# Supplementary material for: Comprehensive Network Analysis of Anther-Expressed Genes in Rice by the Combination of 33 Laser Microdissection and 143 Spatiotemporal Microarrays
Source: PLoS One. 2011 Oct 26;6(10):e26162. doi: 10.1371/journal.pone.0026162 (PMC3202526; doi:10.1371/journal.pone.0026162)
Supplement: Table S11 — Microarray data of Anther_0.7–1.0 mm preferentially expressed genes. (XLS) [file pone.0026162.s012.xls]

## Sheet: Sheet1
Table S11. Microarray data of Anther_0.7-1.0 mm preferentially expressed genes.
RAP-ID	Description_RAP-DB	Description_TIGR	Leaf blade_vegetative_12:00	Leaf blade_vegetative_12:00	Leaf blade_vegetative_12:00	Leaf blade_vegetative_00:00	Leaf blade_vegetative_00:00	Leaf blade_vegetative_00:00	Leaf blade_reproductive_12:00	Leaf blade_reproductive_12:00	Leaf blade_reproductive_12:00	Leaf blade_reproductive_00:00	Leaf blade_reproductive_00:00	Leaf blade_reproductive_00:00	Leaf blade_ripening_12:00	Leaf blade_ripening_12:00	Leaf blade_ripening_12:00	Leaf blade_ripening_00:00	Leaf blade_ripening_00:00	Leaf blade_ripening_00:00	Leaf sheath_vegetative_12:00	Leaf sheath_vegetative_12:00	Leaf sheath_vegetative_12:00	Leaf sheath_vegetative_00:00	Leaf sheath_vegetative_00:00	Leaf sheath_vegetative_00:00	Leaf sheath_reproductive_12:00	Leaf sheath_reproductive_12:00	Leaf sheath_reproductive_12:00	Leaf sheath_reproductive_00:00	Leaf sheath_reproductive_00:00	Leaf sheath_reproductive_00:00	Root_vegetative_12:00	Root_vegetative_12:00	Root_vegetative_12:00	Root_vegetative_00:00	Root_vegetative_00:00	Root_vegetative_00:00	Root_reproductive_12:00	Root_reproductive_12:00	Root_reproductive_12:00	Root_reproductive_00:00	Root_reproductive_00:00	Root_reproductive_00:00	Stem_reproductive_12:00	Stem_reproductive_12:00	Stem_reproductive_12:00	Stem_reproductive_00:00	Stem_reproductive_00:00
Os01g0103100	TGF-beta receptor, type I/II extracellular region family protein.	peptide transporter PTR2, putative, expressed	6.54375	6.31008	6.29919	6.51191	6.63063	6.62227	8.0449	7.74671	7.82203	7.3004	7.1406	6.92237	6.59169	7.16258	6.75253	6.91487	7.35915	7.61141	7.14649	7.87118	7.92747	7.43371	7.64838	7.40609	6.9148	6.3029	7.13474	7.71045	7.8384	7.20536	4.92095	4.01892	4.63685	4.42362	4.40796	4.37271	5.67028	5.87938	5.78513	4.80974	5.04229	5.43915	6.65201	7.11921	7.16649	6.08247	6.87423
Os01g0108000	Conserved hypothetical protein.	expressed protein	8.95275	9.29478	9.04364	9.07634	9.27643	8.93006	9.45215	9.61982	9.38286	9.55921	9.59484	8.76685	9.02796	9.19012	9.08983	9.17893	9.76803	9.86235	8.5697	8.50297	9.12529	9.09935	9.51021	9.5854	8.06366	7.33966	7.91824	8.78543	9.20394	8.30675	8.5703	8.81393	8.80191	8.71434	8.60325	8.85158	8.38477	8.50362	8.78835	9.04944	8.57137	9.00572	9.30702	9.40062	9.16221	9.92696	9.81993
Os01g0110800	Leucine-rich repeat, plant specific containing protein.	TOO MANY MOUTHS precursor, putative, expressed	4.2373	4.22229	6.66828	4.82508	5.56453	5.11918	4.80333	4.36398	4.29888	5.60169	5.26347	5.24373	4.17571	2.97306	3.67779	5.2792	4.42371	4.84242	11.0955	11.0124	9.88893	12.4647	12.0404	11.7882	5.07656	3.38548	5.29025	4.3059	4.3137	5.1961	6.8638	6.82431	6.5647	6.98246	6.99108	6.344	5.78262	6.28682	5.71546	5.82046	6.68242	5.59895	12.3446	11.9645	12.2447	7.17363	12.2654
Os01g0119100	Protein of unknown function DUF563 family protein.	No Hit	7.83844	6.75603	9.14625	6.28954	6.08845	8.1293	6.38121	4.8304	5.2494	4.14177	4.15213	5.20313	3.73321	4.5627	3.45043	4.4908	3.73582	3.19018	9.41971	9.31589	9.6641	9.18371	9.501	9.36396	7.34359	7.73673	7.85391	7.00124	7.69742	8.51423	9.38732	9.03302	9.62552	9.76723	9.41869	9.50085	7.5661	7.70629	8.1946	7.85104	7.55577	7.80321	8.6906	8.12163	8.47636	9.47428	8.5396
Os01g0121800	Hypothetical protein.	xylosyltransferase, putative, expressed	10.3856	10.0398	9.93149	10.6642	10.3966	10.2348	11.1053	10.907	10.9512	11.1849	10.7729	10.4368	11.3132	11.002	10.843	11.1336	10.8421	11.062	10.7149	10.8765	10.8041	11.2229	11.2873	11.3905	10.3377	9.77469	9.97915	10.7435	10.7583	10.507	11.7284	11.1118	11.5904	11.891	11.0564	11.2532	10.9202	10.5937	11.349	10.9065	10.7607	11.3436	11.899	12.0875	12.1616	11.3363	11.7125
Os01g0127100	Conserved hypothetical protein.	No Hit	2.90818	3.24833	3.55927	1.798	2.71788	4.23731	2.83613	1.83373	1.28447	2.16347	2.86815	2.58407	2.10791	1.68268	1.7067	1.28609	1.47219	1.40743	1.63916	1.79187	1.64164	2.3817	2.39964	1.31871	2.83472	0.405625	2.32989	2.65892	1.96239	2.05137	3.21692	4.1248	3.64101	3.1073	4.34682	3.18665	4.38179	4.11211	3.63433	3.99633	3.654	3.20528	1.9183	1.1519	1.40724	1.25094	1.46558
Os01g0148400	Brix domain containing protein.	expressed protein	13.013	13.1445	12.8104	12.1546	12.2668	12.1466	12.1935	12.1199	11.818	12.0389	11.9808	11.496	11.7797	12.1694	11.9039	12.0775	12.3269	12.2486	12.5118	12.1782	12.2977	12.2934	12.4311	12.6482	11.1216	10.7372	11.0752	11.3186	11.3588	10.7599	11.3353	11.1554	11.2553	11.2257	10.6009	11.0321	9.74147	10.0513	10.4093	10.7385	10.0348	10.5222	12.9626	12.9206	12.628	12.1505	12.9333
Os01g0150100	Geranylgeranyltransferase beta subunit.	geranylgeranyl transferase type-1 subunit beta, putative	8.74892	8.89903	7.95105	8.76375	8.83502	8.09302	9.16619	8.70514	8.23755	8.9367	8.93584	8.50461	8.01164	8.18997	8.43993	7.94995	8.47186	7.42266	8.02659	8.18532	8.47455	8.4167	8.62253	8.71046	7.9491	7.25375	8.08589	8.28866	8.1113	7.79488	9.02499	8.56991	8.95192	9.01093	8.0308	8.42041	7.74559	8.43556	8.71771	8.75068	8.5764	8.86986	10.1516	9.87891	9.60019	8.69439	9.73987
Os01g0179200	Syntaxin, N-terminal domain containing protein.	syntaxin, putative, expressed	10.9659	11.1329	10.634	11.1876	11.4164	10.9866	10.8429	11.2991	11.0733	11.2409	11.4724	10.8633	11.7887	11.9063	11.3984	11.7401	11.7529	11.766	11.4803	11.3121	11.6111	11.7679	12.0335	12.0229	10.615	10.0205	10.5448	11.0929	11.5987	10.6601	11.7099	11.8166	11.9843	11.8275	11.7593	11.7476	11.2832	11.0526	11.6173	11.0226	11.071	11.5858	11.8673	12.633	12.5554	12.4021	12.0674
Os01g0191800	Serine/threonine-protein kinase 12 (EC 2.7.1.37) (Aurora-B) (Fragment).	CAMK_CAMK_like_Aur_like	3.78587	2.87399	3.27119	3.26039	3.18576	3.57034	4.86754	4.12358	3.71529	2.86487	2.83086	2.6553	4.4864	4.74125	3.68825	4.35907	3.66961	3.94738	12.0389	11.4505	8.35274	12.4459	11.9268	11.4609	3.62037	5.47206	4.65345	3.49862	4.06617	4.37099	11.9212	11.6891	11.6016	11.8195	11.2992	10.855	9.19369	9.04924	10.1257	9.55387	9.69479	10.4328	13.1915	12.4584	12.4435	6.6169	12.4574
Os01g0229000	Hypothetical protein.	MYB family transcription factor, putative, expressed	0.0835944	0.0470617	2.63008	2.16632	0.547328	3.02023	2.69902	2.242	2.24221	0.395884	1.69398	1.65179	1.38223	2.20524	7.35146	1.01921	3.01228	3.22532	2.12956	3.16248	2.78139	4.56441	4.38412	5.03611	3.28555	4.64825	4.43285	-0.966088	0.915482	3.2594	5.33049	4.55663	4.92662	5.68188	4.51484	4.79473	2.96521	1.81778	3.89261	1.9134	3.27106	4.22837	5.12762	5.10168	5.51171	3.09457	5.19293
Os01g0273100	Cyclin-selective ubiquitin carrier protein E2-C.	ubiquitin-conjugating enzyme, putative, expressed	2.34631	4.89996	5.12653	2.6966	2.62877	3.25413	5.24804	4.74283	4.73897	2.9681	5.09701	2.86964	1.88772	2.2886	0.907185	1.3369	1.04266	3.23084	13.0129	12.5918	9.76507	13.7158	12.9781	12.608	2.6482	5.33416	6.03712	2.33534	5.93456	6.70283	12.5749	12.5705	12.4027	12.4948	12.1941	11.7284	9.57245	9.87544	10.9158	10.1809	10.4662	11.2468	13.9571	13.3326	13.4562	3.41324	13.5548
Os01g0293100	Basic helix-loop-helix dimerisation region bHLH domain containing protein.	helix-loop-helix DNA-binding domain containing protein, expressed	2.98323	3.08399	2.71221	2.57079	4.63211	2.03079	1.93078	1.4039	3.14064	1.70112	1.13764	2.78023	2.52419	3.44803	1.88636	1.15796	2.03374	1.7172	5.45573	4.67017	3.17337	4.19681	4.23051	4.8731	2.96806	0.00105759	3.27034	0.912217	3.04567	4.16749	4.38626	3.21162	4.00183	3.99751	2.69637	3.25168	3.42598	0.674479	2.57653	1.97896	0.600442	2.13446	7.9582	6.58796	6.05789	5.5484	7.72866
Os01g0300600	Intradiol ring-cleavage dioxygenase domain containing protein.	nodal modulator 1 precursor, putative, expressed	10.8756	11.1672	10.2223	10.9783	11.1568	10.3162	10.9934	11.3262	11.299	11.3034	11.5414	10.7728	12.0478	11.9626	11.3938	11.4867	11.9485	11.6089	11.561	11.608	11.2095	12.0493	12.2653	11.9008	10.9518	10.6722	11.2956	11.8269	11.5391	11.0756	12.1736	11.8284	12.2032	12.2262	11.5662	11.6259	10.7439	10.9922	11.4522	11.347	11.0625	11.5317	12.4457	12.8707	12.7993	10.804	12.4687
Os01g0317500	Conserved hypothetical protein.	No Hit	8.28285	8.94781	8.04204	7.33593	7.41286	7.52069	7.92856	8.20022	8.6173	7.50985	7.71392	7.98511	7.97787	8.19905	8.4452	7.2996	7.19475	8.00836	8.39783	7.92763	8.8204	7.42717	7.88343	8.41074	6.81851	6.9107	4.25702	5.94199	6.74046	4.89831	6.56063	6.62048	7.27921	6.28106	6.36819	9.36002	7.84468	7.263	9.60377	6.97766	6.67324	6.48819	8.20465	8.25048	8.4413	6.59399	7.503
Os01g0317800	Alpha/beta hydrolase family protein.	esterase/lipase/thioesterase family protein, putative, expressed	12.8249	13.288	12.7065	11.6698	11.8523	12.0817	13.0682	13.8215	13.6781	11.6867	12.0682	12.0211	13.6428	14.1301	14.0167	12.5067	12.2458	13.1292	14.4384	13.8853	14.2432	13.693	13.6431	13.6455	13.4818	13.1669	12.768	12.484	12.4753	11.892	12.1185	12.4919	12.7139	11.805	12.0513	12.0971	13.0905	12.8908	12.542	12.031	12.0984	12.4796	14.5161	13.9464	14.0654	12.4515	13.4421
Os01g0332900	Hypothetical protein.	acidic leucine-rich nuclear phosphoprotein 32-related protein 1, putative, expressed	12.8413	12.788	12.6064	13.7743	13.554	13.6633	13.8695	14.0422	14.3598	14.1366	13.9491	13.4533	14.5226	14.1913	13.9108	14.4361	14.4099	14.442	13.1387	13.1298	12.8341	13.6105	13.532	13.4505	12.1551	11.453	11.8396	12.8236	13.3141	12.0014	12.8494	12.5099	12.5693	12.9327	12.6301	12.57	12.2259	12.2989	12.4262	12.6946	12.3417	12.4866	14.2203	13.669	13.8999	13.5163	13.6505
Os01g0339900	Thioredoxin-related domain containing protein.	OsPDIL2-2 protein disulfide isomerase PDIL2-2, expressed	11.8186	12.0016	11.4486	11.2614	11.2308	10.9736	11.5535	10.9819	11.2307	11.8182	11.3766	11.1818	11.5438	11.5522	11.6408	11.251	11.4538	11.4974	11.9306	11.9323	11.9449	11.639	11.5281	12.0327	10.9111	10.3915	10.8581	10.956	10.7926	10.6988	12.4088	12.1207	12.4358	12.3141	11.8123	12.1316	10.6704	11.1546	11.8476	11.6437	11.247	11.9051	12.0187	12.3705	12.5303	11.1951	12.0476
Os01g0514600	Calponin-like actin-binding domain containing protein.	fimbrin-like protein 2, putative, expressed	5.42	5.42171	6.42407	5.9841	5.83634	5.85151	5.15744	5.30165	4.77647	5.82423	5.63478	5.46841	4.65758	4.21033	4.41735	4.95177	5.03105	5.29143	10.3006	9.93238	9.48609	10.759	10.7775	10.8822	6.79448	6.74596	7.59706	6.7677	6.70669	7.2758	10.6271	10.1717	10.5596	10.7228	9.86738	9.66826	7.69453	7.9962	9.19414	8.32294	8.6262	9.22769	11.7841	12.2862	12.0688	11.614	12.1049
Os01g0531300	ARM repeat fold domain containing protein.	conserved hypothetical protein	8.19733	8.63961	8.98679	8.08264	8.23018	8.52757	8.53549	8.54879	8.00451	7.59571	8.2343	7.68313	7.0995	7.86985	7.69132	7.31045	8.20163	7.49575	9.31761	8.73586	9.49055	8.87224	9.47406	9.70405	7.5975	7.25411	7.45819	7.96585	8.12534	7.75786	8.7288	8.93927	9.17377	8.91021	8.25529	8.809	8.22736	8.37025	8.77736	8.11213	8.24816	8.98313	9.81595	10.1045	9.81237	10.0797	10.0529
Os01g0559100	Seryl-tRNA synthetase (EC 6.1.1.11).	seryl-tRNA synthetase, putative, expressed	11.3839	11.4149	10.7628	11.594	11.3903	10.9308	11.047	10.9893	10.8697	11.328	11.3326	11.059	10.8977	10.9937	10.8237	11.1136	11.2475	11.0324	11.5442	11.2436	10.9189	11.7377	11.7058	11.6886	10.4906	9.83242	10.54	10.8439	10.6345	10.1813	11.582	11.0486	11.3211	11.9431	10.9113	11.1638	9.63103	10.0098	10.5859	11.0242	10.361	10.7098	11.961	11.805	11.7581	10.5524	11.4689
Os01g0610500	Conserved hypothetical protein.	Yip1 domain containing protein, expressed	10.7252	10.5738	10.094	10.8087	10.954	10.1201	10.6479	10.8342	10.7138	10.8477	10.9729	10.2439	11.2025	11.1587	10.7755	10.6851	10.8933	10.6471	11.1877	11.1421	11.4559	11.5353	11.7294	11.646	10.3827	9.94033	10.3657	10.9437	10.7166	10.0461	11.9919	11.6493	11.974	12.1245	11.6121	11.5369	10.8146	10.6791	11.2901	10.9029	10.7477	11.1603	11.6153	12.5297	12.441	11.8534	12.2267
Os01g0621600	Protein of unknown function DUF1221 domain containing protein.	protein kinase family protein, putative, expressed	6.7783	5.87438	6.59495	6.2172	6.46069	6.90757	6.04857	6.16923	6.09644	6.5707	6.50416	6.86843	4.2686	5.37551	4.79938	5.72268	5.81018	5.77121	7.13286	6.86977	8.1135	6.31185	7.67357	7.33385	5.81612	6.47797	4.28806	6.56906	6.38699	5.71023	7.23314	7.19161	7.5396	7.1481	6.99889	7.11347	7.40709	7.01838	7.37138	7.20815	7.27887	7.06209	4.61723	6.40634	7.31904	8.77667	7.47927
Os01g0632700	Hypothetical protein.	retrotransposon protein, putative, unclassified	5.26654	4.97994	4.632	5.26998	5.00799	4.60637	6.23497	6.01508	5.80795	6.43653	6.04465	5.27651	5.10416	4.84983	4.58761	5.36413	5.62459	5.71702	5.24929	5.34278	5.6739	5.11005	5.41897	5.44153	5.80789	3.99962	5.62468	4.9656	5.59022	5.59523	5.55417	5.53912	5.47096	5.65947	5.35137	5.1335	5.42739	5.7141	5.4642	5.5939	5.34809	5.3034	6.45929	5.85703	5.23208	6.07357	6.14844
Os01g0667800	U2 snRNP auxiliary factor, small subunit.	splicing factor U2AF 35 kDa subunit, putative	7.68775	7.90652	7.21466	7.46022	7.46581	6.64503	7.30568	7.17438	7.19313	7.49447	7.57651	6.93667	7.15005	7.00893	7.27012	6.38525	7.06075	6.32106	6.15692	6.00647	6.39502	6.03057	6.61236	6.22379	4.30356	4.38222	5.76555	5.43679	5.54456	5.33577	5.81304	5.42108	5.62765	5.68303	5.0527	5.12885	5.62808	5.45525	6.06996	5.72694	5.34355	6.38634	7.18491	6.3812	6.21243	7.48151	6.94709
Os01g0672500	Conserved hypothetical protein.	callose synthase, putative, expressed	11.5007	11.804	11.0386	10.3201	10.454	9.91532	11.0279	11.7569	11.7261	10.6705	11.0312	10.1957	11.8058	11.6075	11.2346	10.2757	10.7123	10.5244	10.5015	11.3121	10.831	11.32	11.1974	11.0064	10.8962	10.4322	11.0345	10.8064	11.1053	10.0556	10.9103	10.914	11.0575	10.7998	10.3804	10.3391	9.99923	9.99496	10.5495	9.81032	9.90343	10.5452	11.9981	11.5952	11.5014	10.2221	11.7296
Os01g0745700	Zn-finger, GATA type domain containing protein.	GATA zinc finger domain containing protein, expressed	3.78389	3.17012	4.76139	2.92481	4.61985	5.62514	2.13424	4.34067	3.2202	2.22513	2.21244	4.38319	4.07146	2.60079	0.459743	3.95145	2.40122	0.619939	10.3919	10.3641	8.64707	12.4361	12.0698	11.0569	4.86892	4.15023	5.80786	0.758867	3.40435	4.37969	10.9708	11.0622	10.7203	11.2523	11.2794	10.5253	8.21837	8.25315	9.05973	8.62253	9.14735	9.21517	11.4749	10.9292	11.2754	4.26229	11.7589
Os01g0748200	(No Hit)	expressed protein	7.70082	8.01713	7.55117	8.22841	8.36682	7.54529	8.03442	8.38448	8.40206	8.68339	8.84897	8.74507	9.08219	9.50484	8.82864	9.34458	9.40197	9.40486	7.94664	8.50986	7.41175	8.60331	8.27111	8.11222	8.00671	7.92377	8.33611	9.24082	9.05452	8.36941	8.24555	8.23119	8.1321	8.21074	7.93416	8.21835	7.35892	7.93467	7.86582	8.32165	7.99482	8.02142	8.60693	8.61005	8.71066	7.44125	8.48425
Os01g0759900	Permease 1.	nucleobase-ascorbate transporter, putative, expressed	8.0008	8.08954	7.74837	9.24285	9.22244	8.26219	8.03539	6.872	6.68149	7.70905	7.11577	6.97692	8.75539	7.66692	7.98108	8.71698	8.64227	8.13678	12.2155	11.4541	8.886	12.3002	11.7105	11.9395	5.79706	6.03958	6.20172	6.92011	6.15776	5.67236	10.7188	10.3212	10.2734	10.9699	10.4229	9.76818	7.68086	7.78141	8.78215	8.73199	8.38431	9.27966	13.1291	11.7873	12.0769	6.33132	12.8847
Os01g0760400	TIR domain containing protein.	AP003256-AK101847 - NBS/LRR genes that are S-rich,divergent TIR, divergent NBS, expressed	6.94553	7.18583	6.63395	7.16361	7.01989	6.62869	7.04941	7.66944	7.60224	7.93003	7.67837	7.44674	7.66269	8.1945	7.83817	7.40285	7.64232	8.02607	8.68034	8.33863	7.94447	8.77422	8.6132	8.64057	7.70766	7.52104	8.02274	7.96651	7.75444	7.27603	8.57616	8.50895	8.57483	8.5496	8.10577	8.21302	7.70303	8.193	8.21867	8.12817	8.25544	8.31523	10.0449	9.89619	9.84612	8.59795	9.94182
Os01g0776800	Conserved hypothetical protein.	expressed protein	8.39087	8.01437	7.5429	8.97021	8.46421	7.71898	8.40755	8.28955	8.39103	8.96798	8.82155	8.10642	8.13038	8.27562	7.82679	8.58492	8.83503	8.28804	7.01071	7.75821	7.54574	7.48185	7.49029	7.73416	8.00228	7.10139	7.85155	8.25231	8.66416	7.86211	8.27694	7.64292	7.9954	8.46967	6.96083	8.0934	7.49018	7.91165	8.25857	8.56219	7.92115	8.50578	7.35137	7.59132	7.74677	8.00009	8.34107
Os01g0811400	Exostosin-like family protein.	exostosin family domain containing protein, expressed	7.91953	8.05303	7.35758	8.15909	8.17485	7.45736	8.29064	8.05199	7.59312	8.20929	8.27102	7.37694	7.58108	7.88414	7.70406	7.178	8.19551	7.37021	8.25298	8.2874	8.51345	8.42144	8.8931	8.70877	6.94825	6.25187	6.91131	7.70632	7.52	7.16986	8.75967	8.41551	8.4661	8.86391	8.20402	8.05508	7.13519	7.63967	7.93081	7.06167	7.93923	7.96531	9.61114	9.82933	9.3883	8.77853	9.48424
Os01g0841500	C-myb-like transcription factor (Fragment).	MYB family transcription factor, putative, expressed	10.945	11.1319	10.7972	11.9078	12.0833	11.4879	11.448	11.6286	11.4506	11.6308	11.8044	11.2334	11.3854	11.5002	11.2847	11.1721	11.5482	11.3437	11.2276	11.2016	11.0781	11.6281	11.5669	11.5291	10.6808	9.93734	10.3548	10.5945	11.0582	10.922	11.3174	11.0279	11.4615	11.3997	10.6331	11.2267	10.3981	10.6688	11.2927	10.9607	10.7874	11.3687	12.2269	12.0469	12.0709	11.8675	11.9933
Os01g0861500	(No Hit)	No Hit	2.20698	1.74234	1.99668	2.31681	1.55279	3.55799	-0.0857854	0.869251	3.09538	1.48722	2.65573	1.67548	1.72211	1.61828	1.53952	3.06614	2.35826	3.79079	3.99918	3.33142	2.69759	4.01899	4.33019	4.66839	2.92028	2.06862	3.6404	2.76275	2.00304	4.5297	4.53463	4.8099	4.54515	4.76763	4.98492	4.30684	3.35678	4.42418	3.80587	4.05743	4.56206	4.38463	5.39651	4.67711	4.73038	4.91875	5.23617
Os01g0877400	Avr9 elicitor response-like protein.	galactosyltransferase, putative, expressed	2.25447	3.01493	1.60201	2.64754	2.80803	-0.674799	1.88709	2.0019	2.23462	1.80849	2.7975	2.47716	2.13694	2.14615	1.58607	1.42674	2.25735	1.04306	2.71792	2.03569	5.33357	1.63081	2.12933	1.62265	1.32429	2.95569	-1.37492	2.22238	2.1707	2.08794	2.68796	3.16061	1.58522	2.43833	4.08281	2.10481	3.735	3.77546	3.98841	2.77346	3.1803	1.978	1.80802	1.94704	2.19596	2.55678	1.83369
Os01g0898300	ARM repeat fold domain containing protein.	cyclin-related protein, putative, expressed	10.3102	10.3504	10.4196	10.3454	10.5915	10.3303	10.3093	10.0668	9.86294	10.6006	10.6843	10.1648	10.0839	10.5063	10.1984	10.0858	10.8401	10.3737	10.2263	10.1957	10.4882	10.3427	10.6893	10.7318	10.157	9.6423	9.95968	10.8219	10.3676	10.1688	10.317	10.0925	10.7952	10.4184	9.90652	10.311	8.87971	9.49761	10.0374	10.0745	9.93489	10.2558	10.5224	11.2512	11.1648	10.5073	11.271
Os01g0902100	(No Hit)	multidrug resistance-associated protein, putative, expressed	3.49748	3.75118	3.4843	2.56906	3.36738	5.82347	4.05906	2.52413	3.53134	1.06	4.11983	1.09327	2.40936	2.26822	2.64392	1.32403	1.05808	0.800314	4.11762	3.62614	5.10626	4.34113	4.53869	4.52308	3.07261	5.54071	0.182858	1.18133	2.35008	-1.75408	5.0162	4.76858	4.80694	4.62329	4.1327	3.83827	3.13929	2.4463	3.64011	2.3699	2.23577	2.42979	3.05128	4.38265	3.97396	3.38466	3.96324
Os01g0908100	RabGAP/TBC domain containing protein.	TBC domain containing protein, expressed	8.50604	8.57017	8.12301	9.81603	9.72034	9.20667	9.12876	8.81814	8.58133	9.3873	9.60496	9.00422	7.7236	7.77473	7.94216	8.46003	9.07743	7.8913	8.47065	8.25386	8.60402	8.29788	8.72649	9.10656	7.83233	6.85529	7.36979	7.32387	7.9997	7.79711	8.47533	8.29214	8.62396	8.53066	7.80965	8.24855	7.64927	7.7787	8.28527	7.64693	7.95169	8.40225	9.52483	9.49701	9.46146	8.56813	9.63218
Os01g0914300	Plant lipid transfer/seed storage/trypsin-alpha amylase inhibitor domain containing protein.	LTPL39 - Protease inhibitor/seed storage/LTP family protein precursor, expressed	1.1177	3.08874	1.75613	1.70872	5.54654	1.85947	2.05571	1.92796	2.61067	1.43224	3.08514	3.39664	3.50833	1.84606	2.30772	-0.772229	2.26197	2.43231	14.1044	12.6747	13.967	13.839	14.3498	13.7938	3.70332	2.31453	4.72718	3.07348	4.00265	3.2507	14.3858	14.6121	15.3285	14.02	14.0517	13.7992	11.3049	11.9011	13.4408	12.0967	12.4533	13.8245	13.1808	14.1452	13.8793	6.24605	13.136
Os01g0967600	Hypothetical protein.	expressed protein	10.6891	10.5303	10.1072	10.5529	10.3571	10.1801	10.5739	10.5931	10.4087	10.212	10.3947	9.76003	9.91247	10.3441	10.1758	9.89273	10.4639	10.0022	9.8071	9.92471	9.58157	10.0252	10.168	10.1052	9.37128	8.68406	9.5862	9.8063	10.0484	9.26284	9.42927	9.17387	9.385	9.80868	8.8831	9.49146	8.06266	8.5539	9.06421	9.38431	8.81136	9.30215	10.389	9.95679	9.82457	10.1023	10.1777
Os01g0973500	Protein kinase APK1A (EC 2.7.1.-).	protein kinase domain containing protein, expressed	7.20709	7.22665	7.3161	5.93528	6.06479	6.16205	7.49501	7.62128	7.30615	6.25824	6.26663	6.51256	6.77793	7.43757	7.35227	6.83254	7.10008	7.14527	7.20175	6.77471	6.50083	6.57203	6.87071	6.95155	5.82457	5.94738	6.01249	6.994	6.32411	5.83999	8.66096	9.04093	9.03815	8.72607	8.9569	9.25328	7.72006	7.59479	8.17135	8.28689	7.72819	7.97643	7.83165	8.65409	8.45382	8.45928	8.92359
Os01g0974700	Soluble inorganic pyrophosphatase (EC 3.6.1.1) (Pyrophosphate phospho- hydrolase) (PPase).	No Hit	9.44149	9.69211	8.91186	10.6583	10.5771	10.1082	9.88843	9.48096	9.42661	10.1165	10.1092	9.74876	9.52443	9.40534	9.8334	9.80906	10.3453	9.27102	8.58404	8.75748	9.88177	8.6561	9.53428	9.91625	8.28515	7.54992	8.3135	8.33382	8.30445	8.4158	9.60762	9.28939	9.90904	9.61553	8.79941	9.63385	9.47074	9.68501	10.1197	9.64449	9.82217	10.2835	9.71598	10.4166	10.0825	10.7865	9.75463
Os02g0120500	Basic helix-loop-helix dimerisation region bHLH domain containing protein.	helix-loop-helix DNA-binding domain containing protein, expressed	1.72296	0.991268	2.17859	1.4084	3.77658	2.00557	4.55787	4.4006	4.24896	3.94848	5.88345	2.99355	5.30035	6.0349	5.57504	3.61292	3.94193	4.26457	0.437072	-0.226499	1.71181	4.08489	2.56529	2.64186	3.67296	1.37247	2.92388	2.11306	2.64447	4.96344	1.08536	3.02161	1.15278	0.428434	0.280257	1.50106	3.40953	2.63661	2.17344	2.99164	1.57958	2.98845	2.99374	2.7265	1.99951	3.18375	3.414
Os02g0127000	TPR-like domain containing protein.	tetratricopeptide repeat containing protein, putative, expressed	11.11	10.9063	10.5673	11.2623	11.1903	10.6926	11.2518	11.2905	11.0203	11.3407	11.4579	11.2909	11.4989	11.7407	11.327	11.3127	11.3723	11.0635	11.2407	11.1445	10.5872	11.0911	10.9053	10.7975	11.3574	10.8437	11.6246	12.0017	11.2805	11.1826	10.8956	10.6464	10.8861	10.9775	10.365	10.4987	9.91524	10.1898	10.4076	10.9453	10.3769	10.6111	11.288	11.483	11.2403	10.4469	10.9605
Os02g0199700	Conserved hypothetical protein.	No Hit	6.99233	6.84115	6.68364	4.38887	4.1198	4.53481	7.12236	7.62955	7.46919	7.6309	4.34919	5.09914	8.25306	8.65424	8.45345	6.44833	6.3658	6.95211	6.90337	7.02453	6.01978	5.87382	5.00133	5.17721	6.49289	7.98893	5.87003	3.74632	3.2989	2.98571	5.25155	5.73012	5.58354	5.05282	5.04618	4.90417	5.86311	5.23798	5.0892	5.03547	5.04375	4.78288	7.57121	6.91431	6.94202	4.88196	6.20365
Os02g0260200	Cyclin-like F-box domain containing protein.	OsFBK5 - F-box domain and kelch repeat containing protein, expressed	7.0413	6.7415	7.29698	6.01099	6.20157	6.40054	7.88838	8.04766	7.97398	8.08002	8.6522	7.96587	6.9012	7.07909	6.64575	6.69922	6.67526	6.94962	8.56667	8.25415	7.74609	8.05945	7.78931	7.7526	7.77572	7.35239	8.23066	8.93661	8.94147	7.90128	7.98873	7.84885	8.24342	7.76018	7.40936	7.8423	7.18344	7.40804	7.80659	7.49266	7.20053	7.69936	9.83505	8.52181	8.56959	7.73288	8.63688
Os02g0313400	Apoptosis inhibitory 5 family protein.	apoptosis inhibitor 5, putative, expressed	11.5478	11.9665	11.3023	11.2462	11.4086	10.9937	12.1409	12.2848	12.133	11.9557	11.9562	11.6686	12.3541	12.6286	12.5766	11.5776	12.0116	12.3438	12.5575	12.3334	11.8298	12.639	12.329	12.5073	11.2476	10.6659	11.1433	11.3068	11.8574	11.2428	11.7429	11.8264	11.8152	11.8872	11.5235	11.5041	11.3683	11.6976	11.77	12.193	11.8319	11.9795	13.695	13.0487	12.9689	11.7653	13.0557
Os02g0471100	Conserved hypothetical protein.	No Hit	3.34543	2.03022	3.11012	5.90762	5.43833	5.35302	5.5402	5.3951	5.13429	5.98282	5.95002	5.43333	4.64349	4.74247	4.50125	4.86767	4.91504	4.42806	4.47589	3.24616	6.48188	3.56505	4.56374	3.66076	3.2144	0.410044	2.50983	4.29764	4.38858	2.47823	6.6066	6.09409	6.5236	6.35705	5.39433	5.4121	5.41636	5.6725	6.08216	6.33638	5.5304	6.50522	5.85834	4.42119	4.46203	4.29799	5.00018
Os02g0502400	(No Hit)	No Hit	6.44137	6.71636	6.98923	6.90084	7.42017	7.24584	6.17384	6.11376	5.7378	6.1862	6.53929	6.50688	5.16717	5.94433	5.20956	6.35877	6.92779	5.81579	9.25661	7.95658	9.01697	9.3636	10.3389	9.97412	6.66042	5.69607	7.99438	7.08785	7.23288	7.55486	5.58688	5.28433	6.35647	5.86163	4.92036	5.57395	7.29257	6.36878	6.20665	6.37478	5.96975	6.6477	10.2411	10.2614	10.0664	8.86103	10.545
Os02g0511800	Conserved hypothetical protein.	SAR DNA-binding protein-like, putative, expressed	3.60597	3.64072	3.79996	3.53382	2.89806	3.92363	4.00441	3.75731	3.9665	4.0698	3.01232	4.22576	3.62176	3.63412	3.9101	4.11294	3.34719	3.64572	4.99755	4.41185	4.11843	5.0665	4.88032	5.44116	4.25189	4.29683	5.18595	3.93744	2.39186	2.36368	7.4174	6.93203	8.16845	7.52986	6.82533	7.26116	6.79861	6.24749	7.29994	6.71244	6.9002	7.71285	8.14714	8.25327	8.19729	4.41068	8.4183
Os02g0532300	Alpha/beta hydrolase fold domain containing protein.	hydrolase, alpha/beta fold family protein, putative, expressed	5.64193	5.9317	5.93816	4.00637	4.56458	4.65116	5.36735	5.68831	5.67597	4.60382	4.97381	4.69252	6.54273	5.84844	6.07219	4.81575	4.15787	5.24783	5.27934	5.0684	6.27303	4.68599	4.80056	5.69421	4.78313	4.46814	4.46202	4.91258	5.26193	4.08733	4.97853	5.26896	5.56988	5.31165	5.27487	6.10043	6.17313	5.10511	5.9467	5.69663	5.27216	6.34053	6.37326	5.29367	5.13354	2.83631	5.23531
Os02g0537900	Vacuolar-type H+-translocating inorganic pyrophosphatase (EC 3.6.1.1).	inorganic H+ pyrophosphatase, putative, expressed	11.3729	11.3791	10.5996	11.4449	11.5143	10.8263	11.6911	11.6447	11.4601	12.0212	12.137	11.0417	11.5123	11.6642	11.2488	11.3561	12.0064	11.6137	11.4876	11.5712	11.4159	12.0372	12.1286	11.9962	10.7309	10.2931	11.0297	11.9176	11.9204	11.2259	12.244	11.9724	12.1328	12.1877	11.7295	11.7531	11.484	11.623	11.7475	11.9275	11.5786	11.8382	12.5288	12.5725	12.5575	12.1464	12.7705
Os02g0552700	Zn-finger, CCHC type domain containing protein.	retrotransposon protein, putative, unclassified, expressed	4.62954	6.87646	6.0244	5.6714	4.89485	4.10316	3.57374	8.84455	5.32817	7.5765	8.74406	8.03369	8.6779	5.67983	5.08216	8.4524	5.55823	4.38832	5.00673	8.08001	7.2826	5.64134	4.14612	4.56448	4.35673	6.53492	4.99533	8.48673	9.25944	8.13797	5.97126	7.32871	8.35173	5.89789	4.76668	6.47522	6.62427	9.56061	6.98289	8.20484	9.82958	9.65668	9.5099	4.84754	4.48928	7.69425	8.21227
Os02g0577100	Zn-finger, RING domain containing protein.	zinc finger, C3HC4 type, putative, expressed	9.72517	9.58782	9.1479	8.43751	8.61366	8.3117	8.32128	7.95181	7.52989	7.08191	7.54054	7.41969	7.12023	7.57604	7.43281	7.26352	7.36411	6.57359	8.03837	7.69705	7.73052	9.0275	9.09447	9.09757	8.69344	8.3296	8.93954	7.63736	7.76366	7.45898	8.31118	7.98131	8.43289	8.81441	8.48879	8.56227	7.8611	7.82706	8.17877	7.9257	7.79529	8.21182	8.90357	8.40487	8.44421	10.2276	9.61982
Os02g0580300	14-3-3-like protein GF14-6.	14-3-3 protein, putative, expressed	6.76391	6.7963	6.94282	7.82461	8.14128	7.92823	6.6043	6.62105	6.64399	7.3554	7.68703	7.67619	6.13315	7.26297	7.02678	7.00247	7.53968	7.41566	6.60843	6.62079	6.54121	7.37162	7.29549	7.89163	3.89786	0.462641	3.99621	7.34825	7.55665	5.69974	6.01189	6.30164	6.93759	6.38944	6.20174	6.94521	6.33945	6.46864	6.48863	5.65674	6.40015	6.30909	7.00502	7.2544	7.49913	6.86494	7.55958
Os02g0591500	(No Hit)	expressed protein	2.2454	1.54833	1.42685	2.34855	2.67385	2.76322	1.01137	2.12219	2.10846	2.06785	1.68386	1.25641	2.697	0.79056	1.1997	2.25795	1.31823	3.4734	4.73258	4.15101	2.71302	5.36117	4.96411	4.7626	3.25358	5.04434	3.65187	1.41491	2.08187	4.29692	4.51322	4.43866	4.3446	4.99551	4.85555	3.99592	3.68759	3.32825	2.86925	2.99133	3.08546	3.33578	5.85831	4.85821	5.93761	1.16147	5.83558
Os02g0600100	Proteasome component region PCI domain containing protein.	26S proteasome non-ATPase regulatory subunit 6, putative, expressed	8.74443	8.92404	8.39024	9.71061	9.76206	9.31574	9.59409	9.547	9.29328	9.51289	9.21855	9.2037	9.69512	10.112	10.2982	9.94316	10.146	10.7649	10.4331	9.43585	10.0476	9.72525	9.94445	10.1216	8.71333	8.52271	8.79057	8.99998	8.80465	8.50962	9.01761	8.98059	8.93553	9.15841	8.54623	8.65774	7.95902	8.38927	8.74009	8.83129	8.40557	9.02119	10.4209	10.2463	9.94199	9.99262	10.225
Os02g0602800	Got1-like protein family protein.	vesicle transport protein GOT1B, putative, expressed	10.2657	10.5678	9.85785	10.9703	11.2379	10.506	10.3674	10.5537	10.4545	10.4647	10.7347	10.445	11.0176	11.427	10.9487	11.2065	11.3534	11.0587	10.5536	10.523	10.0104	10.9609	10.8805	10.8102	10.0284	9.62407	9.76226	10.7526	10.5792	10.1448	11.2741	11.2143	11.6979	11.0942	10.8849	11.1178	9.91185	10.0528	10.8163	10.3074	10.2599	10.8123	10.9128	11.1285	10.9901	10.6095	11.0863
Os02g0629900	Conserved hypothetical protein.	No Hit	1.86693	2.8567	3.62086	2.51324	2.81914	2.70032	2.86582	1.7395	0.650005	1.84472	5.73881	2.10159	0.317933	3.31225	3.71767	2.87396	2.01147	4.01059	4.64494	4.0307	3.23116	4.30455	3.80032	4.13522	3.91603	5.76763	5.64571	-0.790153	2.0887	0.887294	1.62908	1.47648	2.64046	2.17271	1.23192	2.23364	3.46415	2.20356	4.35992	2.86059	0.242622	2.55394	5.62295	5.15218	5.33312	2.94421	4.6411
Os02g0634600	Conserved hypothetical protein.	expressed protein	3.55286	3.09249	5.09167	3.47544	2.99969	3.68145	3.73756	3.12866	4.02405	3.95347	3.98841	4.55066	4.09605	3.59921	3.80327	4.00017	3.82639	3.44523	4.20708	4.28583	3.81882	4.01472	4.18446	4.06848	3.83885	5.60432	5.47135	3.79491	3.70046	4.99544	4.07396	4.05794	3.69764	4.02504	4.37845	3.47159	4.49453	4.5658	3.92968	3.99992	4.2402	4.23962	5.9696	5.44416	5.60368	4.99476	5.60962
Os02g0656500	DnaJ protein homolog (DNAJ-1).	chaperone protein dnaJ, putative, expressed	9.43582	9.6813	9.27072	10.0361	10.39	9.73944	10.8898	10.9737	10.8075	11.2186	11.4454	10.8162	10.5751	11.4139	10.712	11.0189	11.5306	11.0476	10.5619	10.5497	9.75594	11.2012	10.9161	10.8893	11.1025	10.5596	11.3285	11.5039	11.7679	11.2126	9.9471	10.0619	10.018	9.97852	10.0174	9.98871	9.45877	9.94544	9.78214	10.2132	9.99485	10.0185	10.8399	10.6887	10.5612	11.3944	11.6549
Os02g0670400	HMGc1 protein.	HMG1/2, putative, expressed	11.1008	11.2547	10.7831	10.5591	10.6279	10.3788	10.0932	9.94663	10.2117	9.32358	10.154	10.244	11.2664	11.6472	11.301	10.0324	9.92776	9.54785	12.274	11.6758	10.077	12.0348	11.8153	11.7695	10.6911	10.1738	10.7607	9.91978	10.6053	10.6585	11.5176	11.5013	11.6137	11.8053	11.5742	11.1346	9.62627	9.62107	10.1025	9.78825	9.85941	10.7468	13.2052	12.4972	12.6884	10.0723	12.6723
Os02g0687500	Zn-finger, RING domain containing protein.	expressed protein	9.5032	9.52832	9.37862	8.70196	9.26593	8.79152	9.2042	9.71917	9.66918	8.47666	9.02083	8.58994	10.0872	10.3826	10.0607	9.2836	9.36927	9.6408	8.38162	8.44413	7.96917	8.43772	8.11835	7.98397	8.55715	7.77464	7.89506	8.93846	8.44162	7.90943	7.98065	8.18051	8.72099	8.13696	8.1797	8.43622	8.52874	8.31283	8.58177	7.6969	8.01316	8.42405	7.87421	7.5495	7.65866	7.70307	7.40376
Os02g0742200	Small GTP-binding protein OsRac3.	ras-related protein, putative, expressed	9.17172	8.88271	9.2654	9.93795	9.71637	9.5684	9.28911	9.17596	9.22833	9.5503	9.12478	9.31257	10.0894	10.3773	10.3403	9.94723	9.97888	10.3605	10.7763	9.81984	9.99032	10.9695	10.9847	11.2245	9.28023	9.25505	9.12248	9.55576	9.15896	8.81812	10.7573	10.2232	10.6783	10.9711	10.1234	10.4686	8.71076	9.10302	9.85677	9.99678	9.34122	10.1731	10.8002	10.6405	11.1487	8.00576	11.448
Os02g0747900	Basic helix-loop-helix dimerisation region bHLH domain containing protein.	helix-loop-helix DNA-binding domain containing protein, expressed	4.69972	4.21245	5.90647	4.48415	3.48807	6.07769	3.19848	3.80393	5.97641	2.88985	2.70068	3.51022	4.52795	3.85792	3.60862	4.17591	4.01575	3.50027	9.4712	8.10001	9.47404	9.78486	10.4884	10.2968	3.49151	4.4665	4.4801	3.07235	3.2783	3.09995	9.32853	9.28925	9.2561	9.70493	9.34638	8.91439	6.91388	7.10478	7.54036	7.25866	7.9335	8.13961	12.8799	12.3132	12.2055	6.77675	12.6278
Os02g0757800	Conserved hypothetical protein.	No Hit	5.08888	3.47774	4.35377	2.62673	3.94525	2.8801	2.08027	4.06337	2.89763	0.59656	1.91379	3.31239	7.10119	2.46964	1.43704	4.27294	2.36089	3.76692	2.91357	2.89959	3.09234	4.48039	3.25595	2.97412	3.60509	4.89098	3.33808	3.25874	3.92359	4.06579	2.7691	3.72636	3.09859	2.61345	4.48683	3.86623	5.06033	4.19293	2.59306	2.91684	5.35536	1.85762	5.18902	3.04148	3.76156	5.48468	3.24541
Os02g0813600	Naringenin-chalcone synthase family protein.	3-ketoacyl-CoA synthase, putative, expressed	3.46669	3.28758	3.69327	5.17366	5.08064	2.5616	3.91904	2.10128	3.78809	3.04021	2.76375	2.04103	3.84138	3.65114	2.07924	3.59906	1.97365	3.9119	8.16443	8.38616	7.87771	8.66322	8.80745	8.44472	8.39832	8.24707	7.02313	9.19715	8.2937	6.85325	2.30823	3.9056	2.01711	1.81219	4.76279	2.33931	4.45997	4.9369	3.23771	4.00621	4.73684	2.44112	7.08754	8.45721	8.0177	9.06602	8.06732
Os03g0108300	Cellulase (EC 3.2.1.4).	glycosyl hydrolases family 16, putative, expressed	5.33621	-0.711363	3.77783	1.42729	1.20042	1.16567	1.88299	1.35545	1.25163	1.55382	2.6643	-0.566986	0.326074	3.81106	1.09451	-0.835357	0.939011	2.53339	12.9296	8.92112	13.7782	10.2361	12.8401	13.2446	-1.59541	4.44058	4.81582	0.39652	1.52686	-1.75004	5.30117	4.74131	6.74452	5.00263	4.69585	3.43176	4.48578	3.2498	4.29101	4.06122	3.9368	6.13933	3.01234	12.5238	14.1874	11.8829	13.3785
Os03g0168700	TPR-like domain containing protein.	tetratricopeptide repeat domain containing protein	5.39049	5.11768	4.93864	5.68781	5.39664	5.32339	4.30832	4.92358	4.54851	5.14035	5.17101	5.38732	4.42001	4.08848	4.62243	5.16798	5.32715	4.83658	9.19134	8.40348	5.68343	9.74685	9.41001	9.31709	5.63266	5.61883	4.32579	4.55326	4.2363	4.71403	9.34516	9.23274	9.08053	9.39525	9.34997	8.81102	7.56424	7.74691	7.58068	6.99165	7.76177	7.77885	10.3589	9.68362	10.0634	4.07705	9.60031
Os03g0198400	Seryl-tRNA synthetase (EC 6.1.1.11) (Serine--tRNA ligase) (SerRS) (Fragment).	seryl-tRNA synthetase, putative, expressed	9.83055	10.2075	9.48039	9.68584	9.7074	9.1584	9.90715	9.71215	9.5917	10.3777	10.4852	10.2071	10.1384	10.5774	10.0153	9.66101	10.1226	9.51235	10.4614	10.3704	9.4237	10.5811	10.3639	10.1195	9.7379	9.48929	10.2663	10.3905	9.87367	9.32421	10.9983	10.6068	10.9589	11.016	10.4673	10.8558	9.57996	10.1955	10.5034	10.7535	10.2901	10.3318	10.5165	10.5015	10.2762	10.4234	10.5171
Os03g0201100	Peptidyl-prolyl cis-trans isomerase like 2 (EC 5.2.1.8) (PPIase) (Rotamase) (Cyclophilin-60) (Cyclophilin-like protein Cyp-60).	peptidyl-prolyl cis-trans isomerase, putative, expressed	10.6772	10.6053	10.2393	10.514	10.4703	10.1329	11.1194	10.7788	10.5127	10.8973	10.6242	9.93688	10.1975	10.4943	10.6308	9.8071	10.5787	10.2034	9.56724	9.36779	9.73265	9.75743	9.8642	10.246	9.37133	8.73105	9.44856	9.03004	9.61059	9.29274	9.96995	9.60653	9.88565	10.1873	9.24179	9.78497	9.0301	9.41924	9.80164	10.0479	9.47223	10.0556	10.2708	10.0572	9.97322	10.2932	10.5622
Os03g0203000	Hypothetical protein.	splicing factor, putative, expressed	8.91964	9.13847	8.48846	8.42369	8.51051	7.93488	9.775	9.82305	9.55334	9.29629	9.27648	8.92467	9.50668	9.72339	9.89022	9.33435	9.59263	9.73364	9.55905	9.34253	9.40146	9.77661	9.77508	9.87941	8.79341	8.21103	8.4803	8.3103	8.73842	8.41686	9.3465	9.07424	9.34221	9.52936	9.0127	9.08178	8.46713	8.60245	9.02771	8.88833	8.65914	9.19158	10.7598	10.2191	10.2571	9.60369	10.4213
Os03g0216600	Neutral alpha-glucosidase AB precursor (EC 3.2.1.84) (Glucosidase II alpha subunit) (Alpha glucosidase 2). Splice isoform 3.	glycosyl hydrolase, family 31, putative, expressed	11.5818	11.7911	10.7754	11.8033	11.8539	11.037	11.9093	12.1567	12.0092	12.7042	12.7921	11.9845	12.5267	12.2648	11.4822	12.3726	12.5875	12.25	12.031	12.4139	11.8229	12.9213	12.7341	12.4427	12.3364	11.9711	12.1531	13.0068	13.0746	12.8864	12.5847	12.3071	12.5687	12.6982	12.176	12.1248	11.9646	11.912	12.0978	11.8182	11.9901	12.303	13.3319	13.2176	13.2245	12.5197	13.3411
Os03g0218200	Conserved hypothetical protein.	expressed protein	4.41559	4.76709	3.37501	6.03812	5.95883	4.33269	6.22857	5.76958	5.32296	7.84796	6.53986	6.04639	4.25777	3.73084	4.59932	4.64779	5.8508	4.70605	5.44767	5.58185	5.69454	6.05724	6.23002	6.11771	4.54555	3.6915	6.68634	5.29987	5.49581	5.61272	6.38985	5.72384	5.78646	6.84697	5.28534	5.52116	5.45775	6.24778	6.58441	6.39859	6.22208	6.80117	8.04128	7.49291	7.34544	7.40096	8.11539
Os03g0220100	Very-long-chain fatty acid condensing enzyme CUT1 (Very-long-chain fatty acid condensing enzyme (CUT1); 56079-54227).	3-ketoacyl-CoA synthase, putative, expressed	9.68427	9.64665	10.4571	8.64957	9.11276	9.85656	9.8092	9.90406	9.91396	8.98532	9.24709	9.31456	8.64406	8.89418	8.83	9.24859	9.45231	9.83425	11.7151	11.8573	13.2888	11.8487	12.7706	12.162	10.9096	10.6018	9.93941	11.1811	11.7364	10.5671	11.8285	11.7617	12.4648	11.2343	11.239	11.0834	10.7231	10.0483	11.5393	10.0348	9.58651	10.4528	7.99024	9.63034	9.69202	9.96069	9.13152
Os03g0227000	Coatomer gamma subunit (Gamma-coat protein) (Gamma-COP).	coatomer subunit gamma-1, putative, expressed	9.45906	9.43957	9.07922	10.2122	10.1462	9.47918	9.88379	9.85482	9.74766	10.1341	10.1177	9.56253	9.88196	9.98293	9.48702	9.91418	10.0851	10.0306	9.61214	9.68095	9.42846	10.534	10.536	10.4272	9.44836	9.12573	9.18244	10.578	10.2868	9.60052	10.1498	9.96132	10.2439	10.5487	10.0517	10.211	9.27279	9.38312	9.72565	9.49932	9.74296	9.90193	10.8153	11.1388	10.9772	10.6295	11.1656
Os03g0239300	Zn-finger, C2H2 type domain containing protein.	ZOS3-07 - C2H2 zinc finger protein, expressed	8.054	7.99563	8.32094	8.85011	9.56102	8.77986	8.61467	8.97863	8.6161	10.0735	10.7795	9.97255	7.51531	7.89561	7.13702	9.25054	9.53042	8.92589	8.49141	8.41479	7.84319	9.62892	9.33394	8.64077	9.26958	8.49155	9.75919	10.9903	11.9061	11.118	9.82974	9.79097	9.41733	9.31596	9.64567	9.7663	9.99962	10.25	9.91346	9.63083	10.1273	9.52509	8.80894	9.24391	9.36569	10.4153	9.87768
Os03g0246800	Guanine nucleotide exchange factor-like protein.	guanine nucleotide exchange family protein, putative, expressed	5.05069	5.49378	4.64547	5.95735	6.05634	5.00168	5.73642	5.84389	5.85655	6.15742	6.15123	4.89683	5.01584	5.374	4.70935	5.93636	6.3949	6.57042	5.71262	5.88595	5.97014	6.05916	6.29027	5.92957	4.74326	5.53955	5.29124	5.58787	5.8076	4.27987	6.17485	6.28701	6.11342	6.09404	5.955	5.78726	5.28924	4.89904	5.08698	5.39898	5.31964	5.26821	5.56535	6.00025	5.73537	5.59814	6.13029
Os03g0252800	Aminotransferase, class I and II domain containing protein.	serine palmitoyltransferase 1, putative, expressed	4.59929	5.44722	4.23171	5.79606	5.90656	5.32849	5.79246	5.84231	5.46825	5.83494	6.41843	5.44326	4.99044	5.28071	4.93024	5.85885	6.58997	5.66871	4.19027	4.54974	4.32502	5.29389	5.39326	5.22222	5.77661	5.54679	6.14052	5.43946	5.92282	5.32078	5.57862	5.7059	5.0752	5.64967	6.25494	6.1868	5.88352	6.21704	5.61781	5.67177	6.05073	5.60947	4.87223	4.95091	4.64204	5.14966	5.50892
Os03g0254000	Disease resistance protein family protein.	NB-ARC/LRR disease resistance protein, putative, expressed	9.17323	9.01884	9.85409	8.12499	8.60537	8.9589	9.88897	10.4572	10.7372	8.8394	9.03501	8.74557	11.3393	11.7775	11.4375	10.4837	11.013	11.3283	12.4499	12.0237	12.9241	12.3258	12.5706	12.4106	9.71268	9.57792	9.54895	10.2929	10.1717	9.54145	3.26059	2.08128	2.17772	2.80564	2.4491	3.12996	3.96586	0.70297	2.78995	3.06231	1.75109	2.74316	11.4678	11.7578	11.6865	10.641	11.4081
Os03g0261900	ARM repeat fold domain containing protein.	HEAT repeat family protein, putative, expressed	12.5304	12.8176	11.6159	11.0015	10.8192	10.2502	11.2435	11.2261	11.1458	11.1008	10.8326	10.2192	11.0511	11.0678	11.3423	10.1526	10.8818	10.8081	10.7251	11.1564	11.3148	10.7773	11.0195	11.2353	9.95679	9.48722	10.2904	10.2547	10.2216	10.0915	11.181	10.6866	11.0895	11.5116	10.3972	10.815	9.86474	10.1811	10.754	10.6562	10.3021	11.0256	12.5548	12.4252	12.3234	10.8276	12.1321
Os03g0278200	NAD-dependent epimerase/dehydratase family protein.	NAD dependent epimerase/dehydratase family domain containing protein, expressed	12.2873	12.0122	13.3236	11.4819	11.4972	12.6788	10.7357	10.7397	10.953	11.0221	11.0411	10.7615	11.435	11.2703	10.9831	10.742	10.9356	11.2625	12.1114	11.9096	12.3296	11.7628	11.8434	12.0575	11.1191	10.916	10.5724	11.307	11.1877	11.1852	11.4642	11.302	11.7545	11.419	10.9252	11.1317	10.5035	10.494	11.2973	10.2776	10.4937	11.282	12.3545	12.9808	13.1357	12.501	12.4514
Os03g0289200	Protein of unknown function DUF649 domain containing protein.	Yip1 domain containing protein, expressed	9.62048	9.79596	9.24112	9.76555	9.83115	9.25038	10.0107	10.5706	10.4376	10.3302	10.5066	9.81177	11.2754	11.1156	10.3996	10.5609	10.6383	10.8462	10.0915	10.209	9.9774	10.9992	10.9709	10.6148	9.55051	8.91923	9.49451	10.3	10.7247	9.73153	10.8534	10.8083	10.9187	11.0397	10.8127	10.6681	10.3318	9.98224	10.5216	10.2635	10.0306	10.581	11.3495	11.6524	11.6207	9.95065	11.0971
Os03g0296000	(No Hit)	MYB family transcription factor, putative, expressed	4.70728	4.31088	3.70963	3.71155	4.61773	3.63875	3.68112	5.70633	3.06009	1.79264	2.71355	3.40296	6.14306	5.18083	5.14513	5.49165	4.48242	5.34644	4.37971	3.26976	2.93299	3.3634	2.42529	2.25961	4.08286	4.6909	3.83745	1.68875	1.52417	3.28082	3.52487	2.45212	1.34215	3.4887	3.01405	1.74651	5.19455	2.81188	1.62819	3.53874	2.85988	1.96102	2.94579	2.94614	3.10962	2.94636	3.28997
Os03g0306200	Cytochrome cd1-nitrite reductase-like, C-terminal haem d1 domain containing protein.	WD domain, G-beta repeat domain containing protein, expressed	9.33201	9.84938	8.96034	9.15455	9.46172	8.85744	9.45388	9.85763	9.54748	9.69568	9.98636	8.79276	9.27238	9.50469	9.15961	8.93318	9.84342	9.17227	7.94915	8.21772	8.54456	8.29463	8.86094	8.86697	8.2131	7.23493	7.68853	7.91444	9.12231	8.202	8.33851	8.53698	8.51069	8.2294	7.9051	8.50067	8.2185	8.60835	8.77087	8.84835	8.80736	8.91426	9.67156	9.533	9.2513	9.45099	9.64948
Os03g0307000	Hypothetical protein.	expressed protein	7.20351	7.09917	7.40281	7.37216	7.33354	7.51694	6.50569	6.58959	6.60271	6.12257	6.28638	7.61956	6.5043	6.40031	6.67013	5.89299	6.3151	6.416	5.39473	5.57146	5.65832	5.61562	5.63204	5.39835	5.33634	5.15918	6.26133	5.63753	5.78023	6.43772	6.00103	6.0013	6.18697	5.97524	6.23227	6.34732	9.52565	7.84267	7.0924	8.0329	7.70607	7.30871	7.71774	5.74415	5.51247	7.05617	5.89975
Os03g0307400	Quinoprotein amine dehydrogenase, beta chain-like domain containing protein.	SMP-30/Gluconolaconase/LRE domain protein, putative, expressed	8.3048	7.89362	7.07585	7.60141	7.61724	7.26525	7.78201	7.77148	7.73683	7.70969	7.46874	7.19392	7.79826	7.59663	7.34041	7.4863	7.6287	7.6516	9.04379	8.68854	7.51006	9.75505	9.54308	9.4749	7.56672	7.31618	7.18581	8.70757	7.98989	7.27441	10.0631	9.62172	9.79305	10.2044	9.76749	10.0643	8.26934	8.83801	9.43762	9.79966	9.06791	9.28379	9.30954	9.70523	9.68514	6.62604	9.39966
Os03g0310500	CAP protein family protein.	expressed protein	10.7272	10.5501	9.93474	10.9641	10.6125	10.1618	10.3672	10.5186	10.4906	10.3803	10.2181	9.57713	10.741	10.4649	10.29	10.166	10.5991	10.2886	9.91454	10.0053	9.82173	10.4607	10.4702	10.4719	9.18021	8.6584	9.1461	9.05349	9.37498	8.92628	10.9851	10.4096	10.6234	11.0158	10.1127	10.3536	9.77266	9.71774	10.2926	10.3075	9.71325	10.3726	10.6748	10.7405	10.6258	8.70354	10.4535
Os03g0344300	SUMO protease.	ulp1 protease family protein, putative, expressed	10.5306	10.3289	9.76171	10.2492	9.94435	9.76158	10.8003	10.611	10.2447	10.6486	10.3614	9.88331	9.85165	10.1527	9.85165	9.66989	10.1828	9.72766	9.21872	9.37314	8.97566	9.46027	9.60873	9.27303	8.90019	8.14557	8.93057	9.58595	9.36972	9.10894	9.43253	8.87653	9.2033	9.69878	8.94834	9.30927	8.15412	8.87422	9.1765	9.96567	9.18514	9.47868	10.4447	9.82634	9.79203	10.1308	10.2784
Os03g0353500	Hypothetical protein.	expressed protein	11.3521	11.7639	11.1038	11.7712	12.0588	11.584	11.8048	12.2708	12.1995	11.7647	12.1468	11.937	11.671	12.2096	12.1804	11.918	12.2622	12.0784	11.8272	11.5418	11.0009	12.0826	11.8152	12.0287	11.0491	10.2293	10.5808	10.5837	11.4259	10.9468	11.0668	11.2648	11.3199	11.5426	11.4262	11.5785	10.8229	10.8988	11.5138	11.2898	11.2413	11.6181	13.0113	11.9684	12.1866	11.7786	12.4749
Os03g0357800	Regulation of nuclear pre-mRNA protein domain containing protein.	No Hit	10.7506	10.9958	10.5196	10.8844	10.9543	10.6561	10.429	11.0153	11.0094	10.6024	10.9916	9.89543	11.2039	11.2136	10.7904	10.5262	11.2292	10.9031	8.94179	9.44309	9.4795	9.22117	9.6219	9.65029	10.0137	9.28138	9.6447	9.51832	10.2754	9.89709	9.34764	9.6119	9.71792	9.35066	8.93928	9.55139	9.95629	9.61898	9.92065	9.60681	9.52861	9.96822	10.28	10.0302	9.99217	10.2833	10.1018
Os03g0400200	Plant disease resistance response protein family protein.	dirigent, putative, expressed	4.79856	4.43713	5.58327	4.30216	4.94111	5.88148	3.38013	4.16987	4.98272	3.3599	3.60966	4.82771	4.35585	4.72644	4.6334	4.54942	3.90149	4.42392	9.25591	7.88797	8.57426	7.80428	7.76875	8.82022	5.27418	6.7706	5.58329	6.90569	5.54612	6.71642	8.25117	8.87338	9.65686	8.29235	8.74104	8.84956	7.22193	7.1505	8.05331	6.97624	6.74935	7.87896	5.15667	8.08765	8.25283	9.19704	7.66728
Os03g0418700	Conserved hypothetical protein.	expressed protein	3.85658	4.52872	4.24745	4.02415	6.37104	4.70001	3.32253	3.54327	3.64495	4.24868	4.61059	3.88099	4.69361	4.16695	3.7757	4.16768	4.26519	4.25115	6.81424	6.40318	6.95477	8.01218	7.84997	7.59839	4.34747	5.77697	7.88959	2.76951	3.0616	2.09289	7.5422	7.50069	8.20457	7.3986	7.21735	8.52275	5.85807	5.97753	6.93729	5.45384	5.93408	6.70679	8.88419	9.14961	9.52218	5.16512	8.92617
Os03g0422200	Hypothetical protein.	No Hit	6.43582	6.55043	6.51802	7.86849	7.73319	7.49628	6.50485	6.80353	6.43307	7.02734	7.18412	7.35139	5.91083	6.48875	6.10527	5.99105	6.88565	6.85752	5.80634	5.99085	5.34404	6.93193	6.76287	6.74202	7.01086	7.34776	7.1695	7.11111	6.40516	6.65427	6.51175	6.58839	6.18113	6.48436	6.787	6.5807	9.64022	8.00296	6.88175	8.20176	7.76457	6.68138	7.68666	6.7311	6.45825	6.73672	6.96445
Os03g0430400	Peptidase M14, carboxypeptidase A family protein.	No Hit	12.7184	12.7449	12.2484	12.1823	12.0096	11.7554	12.8054	12.2987	12.243	12.426	12.2239	11.3455	11.8517	12.0806	12.024	11.2823	12.3181	11.7011	10.7173	11.0417	11.553	11.0434	11.341	11.5785	11.1151	10.4341	11.1657	10.6052	11.3598	11.2014	11.0955	10.6394	10.8399	11.2231	10.4073	10.83	10.293	11.1871	11.1117	11.3693	10.8565	11.5156	12.1561	11.4005	11.3284	11.8528	11.8377
Os03g0599400	Conserved hypothetical protein.	Leucine Rich Repeat family protein, expressed	6.08199	5.59518	6.44928	6.64065	6.92862	6.79981	5.19294	4.93879	5.39743	5.73771	5.49991	6.10128	5.62892	5.6665	5.69044	6.35887	5.68296	6.36109	5.91384	6.29512	5.62501	6.41402	6.00458	6.03055	6.14356	6.26239	5.84839	6.15183	6.29187	5.94406	6.63401	6.77653	6.10384	6.41512	7.089	6.91315	6.22793	6.45339	5.58974	6.19144	5.97712	5.2674	5.8329	5.67024	5.47962	5.61878	5.67155
Os03g0620800	SEC1-family transport protein SLY1 (AtSLY1).	Sec1 family transport protein, putative, expressed	11.4944	11.4575	10.9112	12.1824	12.1747	11.3972	12.0194	12.0557	11.8316	12.6116	12.4219	11.6249	12.6059	12.6414	12.0764	12.2692	12.5247	12.5794	12.223	12.4064	12.2658	12.5707	12.5368	12.4542	11.8815	11.3567	12.076	12.7415	12.9023	11.8305	12.8937	12.5734	12.6025	12.7705	12.241	12.165	12.1501	12.3555	12.5497	12.5315	12.3198	12.5774	12.6476	13.2657	12.9489	12.7089	13.0292
Os03g0648100	Arabidopsis protein of unknown function DUF266 family protein.	DNA binding protein, putative, expressed	11.3125	10.591	9.95917	11.1316	10.6148	10.0779	10.8235	10.3637	10.267	10.736	10.4315	9.76828	10.5404	10.2047	9.87018	10.2982	10.441	10.1738	10.4336	10.4493	10.6468	11.1122	11.3123	11.1067	9.65007	8.84751	9.36543	10.6494	11.0004	10.381	10.6598	9.74431	9.74352	10.592	9.86866	9.26931	8.34185	8.33138	8.84176	8.89906	8.33391	9.19359	12.3978	11.7915	11.7727	10.5862	11.8811
Os03g0651100	Rhomboid-like protein family protein.	OsRhmbd9 - Putative Rhomboid homologue, expressed	9.38203	9.72998	8.86026	9.89748	10.0377	9.22393	10.4281	10.5563	10.467	9.85424	10.1233	9.7981	10.8275	11.1394	10.9271	10.334	10.5731	10.8177	11.0065	10.7025	10.56	11.5797	11.5405	11.5155	9.79205	9.60345	10.1418	10.1211	9.90174	9.71068	10.7639	10.6097	10.912	10.948	10.4053	10.4058	9.36364	9.47959	10.017	9.50534	9.81305	10.1114	12.0011	12.0576	12.2187	10.5266	11.8186
Os03g0653900	(No Hit)	ribosome inactivating protein, putative, expressed	3.58143	2.81788	3.65267	3.08479	2.7075	2.52126	1.96995	2.97688	2.75705	2.37825	2.61079	3.59435	2.48247	3.47776	2.63403	3.30332	2.86059	2.91881	2.55399	3.42423	2.67294	3.80565	3.42664	2.66811	4.26443	5.75575	4.0459	3.56929	3.00129	0.970737	4.08412	4.96542	2.97836	3.77993	5.82747	4.67952	5.0668	5.28849	3.32179	3.32328	4.99042	2.92368	1.9041	2.47871	2.99875	3.18612	1.80463
Os03g0659700	LOB domain protein 6 (ASYMMETRIC LEAVES2).	DUF260 domain containing protein, putative, expressed	4.92554	5.20337	5.45569	5.66272	6.15534	5.32227	4.27662	5.18151	4.59335	5.56687	6.00226	6.10812	4.84833	4.85694	4.14551	6.24135	5.71271	5.70545	7.69257	7.36592	6.94731	7.52678	7.33774	7.46926	5.16202	6.12342	6.15489	5.16763	5.71071	5.65708	6.16866	6.6179	6.71984	6.23822	6.37783	6.03215	6.57631	5.51621	5.99042	5.56376	5.82253	5.99315	9.11708	8.33675	8.45335	8.08248	8.40582
Os03g0664700	RNA pol II accessory factor, Cdc73 family protein.	No Hit	5.36619	5.45883	6.42924	6.82528	6.59343	5.80751	5.8598	6.05004	5.87456	6.31499	6.29139	5.59418	7.03472	7.18272	6.60047	6.74929	6.68576	6.96783	5.31391	5.6468	4.71857	6.43216	6.15843	5.91013	6.17041	5.28574	5.16344	5.45237	5.30742	4.84208	5.58399	5.52405	5.52761	6.03592	5.74133	5.9864	4.88778	4.50576	4.80959	6.65614	5.26917	4.89337	5.72716	5.9087	5.37309	4.40233	4.86054
Os03g0686900	Hypothetical protein.	5-AMP-activated protein kinase-related, putative, expressed	11.7971	11.3166	11.1758	10.9014	10.5494	10.5927	11.4642	11.2578	11.0689	11.2769	11.2053	10.4301	10.5566	10.6244	10.2747	10.1925	10.6163	10.017	10.1728	9.90352	10.0472	9.97656	10.4321	9.97018	9.20309	8.50894	8.83285	9.81569	10.789	10.142	8.49768	7.97379	8.37128	8.84277	8.09977	8.48943	7.82544	8.05783	8.43474	8.57389	8.07915	8.53375	10.3365	9.81063	9.69991	10.0881	10.0962
Os03g0712100	Conserved hypothetical protein.	expressed protein	2.05356	2.37416	2.46937	2.15666	2.73242	2.30604	2.24052	1.89338	2.91351	1.9859	2.18817	2.15104	0.86747	0.884974	2.41811	2.50357	1.05308	1.90941	9.37477	8.79556	5.63856	9.93696	9.2709	9.27293	1.61267	3.95649	4.07253	0.981652	1.91875	3.39211	7.98427	8.00432	7.83223	8.04931	7.8298	7.2423	5.56728	5.26477	6.2028	5.90688	6.01184	6.38195	10.4933	9.27586	9.40689	1.44251	9.7345
Os03g0725800	Basic helix-loop-helix dimerisation region bHLH domain containing protein.	helix-loop-helix DNA-binding domain containing protein, expressed	9.4366	9.31629	9.3612	7.95172	8.10404	7.88299	10.8892	10.7823	10.5782	10.0326	10.4866	10.7279	8.92951	8.56697	8.45015	8.61797	8.48896	8.1475	10.3294	11.6003	10.4546	11.7857	11.2689	11.2763	11.4613	11.3171	10.8723	12.8517	13.079	13.1028	11.1598	10.9476	11.3485	12.2822	12.1917	11.8873	9.36611	9.81568	10.8308	10.4209	10.5703	10.7206	11.7626	10.6948	10.7705	10.2692	11.3397
Os03g0753500	Conserved hypothetical protein.	expressed protein	12.9981	13.0544	12.7016	13.0091	13.1395	12.48	13.0897	13.5453	13.5448	13.031	13.338	12.6344	13.5003	13.9333	13.5594	13.3177	13.8338	13.7443	12.5765	12.946	12.0832	13.1455	12.7396	12.5684	12.7467	12.0679	12.6641	13.6594	13.8852	13.1426	12.0892	12.0073	12.0999	12.0803	11.7375	11.6576	11.7653	11.8182	12.014	11.8323	11.8326	12.2743	13.4072	13.1349	13.0925	12.3933	13.4395
Os03g0770900	Hypothetical protein.	expressed protein	3.09233	2.84499	3.86734	3.21845	2.84059	3.01862	3.68146	3.1813	2.89305	1.68664	2.59619	3.03309	3.34727	2.70454	6.59749	3.1109	2.77603	2.67328	10.1282	9.81308	6.89381	10.5602	10.1073	9.8622	0.879609	4.45563	4.35322	2.53052	2.96357	3.35004	9.9793	10.001	10.058	9.81035	9.38699	9.14458	8.05983	7.35879	8.51974	7.29191	8.24871	8.79752	11.3	10.9535	10.826	3.18057	10.7102
Os03g0773000	Protein of unknown function DUF1005 family protein.	stress-induced protein, putative, expressed	11.761	11.5155	11.8176	12.1294	12.2281	12.1554	11.5476	11.823	11.9328	12.4248	12.7245	12.2474	11.211	11.7762	11.6866	12.243	12.3267	12.8533	13.2383	13.6295	13.0906	13.8727	13.7396	13.776	12.2657	12.0502	12.0799	13.5127	13.8035	13.2961	12.763	12.7657	13.2555	12.7287	12.4337	12.4517	11.9545	12.0358	12.9077	12.5207	12.396	12.9456	13.8687	14.3751	14.7236	11.5599	14.0149
Os03g0791200	Aldehyde oxidase and xanthine dehydrogenase, molybdopterin binding domain containing protein.	aldehyde oxidase 2, putative, expressed	0.765743	2.35423	0.766093	3.53135	3.33102	1.2911	3.17756	1.91341	2.69638	3.06811	1.59789	2.93041	4.50456	4.02	4.01631	4.0176	4.15885	4.33532	0.129085	0.434631	1.99806	0.385035	0.297962	1.33357	4.29996	3.92084	4.02097	2.52664	0.370736	3.37596	0.327895	1.33018	1.68336	1.37775	0.232444	1.49405	3.16043	0.700913	0.100145	0.269998	0.342025	1.68722	2.00824	0.732321	1.57303	1.07841	0.295953
Os03g0805500	AMP-dependent synthetase and ligase domain containing protein.	AMP-binding enzyme, putative, expressed	10.8085	10.4714	10.7753	10.7694	10.5144	10.5648	10.7517	10.1362	10.0894	9.84505	9.38865	8.9124	10.352	10.034	9.81969	9.25967	9.85954	8.72683	9.93072	9.98102	10.2506	8.98869	9.79446	9.81917	9.46588	8.81205	9.27002	8.91611	9.22372	9.05725	10.1639	9.59712	9.45226	9.91079	8.86357	9.2528	9.35664	9.64211	9.88247	9.85341	9.36612	9.77307	9.87176	10.428	9.85332	11.6448	10.1256
Os03g0821800	Glycosyl transferase, family 2 domain containing protein.	dolichyl-phosphate beta-glycosyltransferase, putative, expressed	9.32645	9.3567	8.70567	10.0937	9.9417	9.26741	10.063	9.61114	9.44273	10.4842	10.5214	9.90372	9.70013	9.69289	9.41423	9.98499	10.3103	9.79491	9.82827	9.58372	9.73099	10.1772	10.3225	10.1807	9.55065	8.99059	9.30802	10.19	9.88462	9.51066	10.3177	9.98411	10.3749	10.7012	9.68603	10.0711	9.72727	9.26899	9.81017	9.72995	9.58029	9.95766	10.2554	10.3469	10.3016	10.069	10.4532
Os03g0826400	RNA-binding region RNP-1 (RNA recognition motif) domain containing protein.	RNA-binding motif protein, putative, expressed	10.5421	10.1177	9.51669	10.5354	10.0983	9.69276	10.9689	10.565	10.1815	10.683	10.0659	9.55486	10.5328	10.6319	10.2653	9.9564	10.2897	9.88269	9.76258	9.64217	9.27469	9.60282	9.61276	9.49451	8.83677	8.17646	9.03883	8.69703	9.24442	8.11552	9.79403	9.31351	9.01972	9.77918	8.73065	8.80471	8.10229	8.71552	8.90005	9.79156	8.90477	8.86781	10.5614	10.2593	10.0054	9.69392	10.145
Os04g0172100	Hypothetical protein.	No Hit	6.91586	6.55258	5.77553	6.48818	6.48137	5.31418	6.98368	6.92897	6.72656	4.85765	5.34715	5.54252	5.65254	5.71022	5.83454	5.90452	6.11204	6.13679	7.08527	6.70728	6.90454	7.89935	7.78129	7.83864	6.37271	6.64896	6.86523	5.53379	5.07046	5.68746	7.19178	7.08275	7.24605	7.78159	7.49017	7.25825	5.66057	6.0838	6.80331	5.57417	5.9591	6.67329	8.00582	8.12659	8.12752	6.66161	7.5046
Os04g0228100	Conserved hypothetical protein.	expressed protein	3.65252	3.80825	4.13273	3.72874	4.17372	4.72727	4.83464	5.30625	4.27509	3.00567	4.51308	3.1141	3.50805	3.12769	2.90829	3.69644	2.49622	3.24778	12.4964	11.8041	8.39934	13.0313	12.3586	12.0994	1.3173	4.63779	5.0547	2.10813	5.28143	5.37167	12.1118	11.7292	11.7659	12.1973	11.407	11.2005	8.90188	8.91648	10.1889	9.34326	9.95959	10.5613	13.459	12.7113	12.788	5.23155	12.8838
Os04g0375900	Kinesin, motor region domain containing protein.	kinesin motor domain containing protein, putative, expressed	3.6863	2.86931	2.43644	5.23957	4.96331	3.83798	5.05303	4.63453	4.39414	4.47828	4.70417	3.57625	2.96865	3.85126	3.36882	4.24183	4.6684	4.50586	9.53314	9.4554	6.85016	10.4641	10.1982	9.75104	3.57147	4.23884	6.15262	3.53323	5.09929	5.84669	10.0787	9.76124	9.66845	10.1951	9.36141	8.91771	7.50297	7.39147	8.33118	8.01987	8.23065	8.86766	11.3095	10.6963	10.5312	3.25066	10.9344
Os04g0381000	Dynamin-like protein.	dynamin family protein, putative, expressed	8.87717	8.91039	7.87301	8.60186	8.52544	7.84607	9.32486	8.76597	8.47556	9.37971	9.08293	8.53295	8.88907	8.78706	8.8152	8.84865	8.9786	8.48686	8.32191	8.30022	7.93292	8.36077	8.19956	8.61899	8.13161	8.06494	8.28823	8.33128	8.40632	8.09968	8.80456	8.44418	8.68768	9.07739	8.2453	8.40925	7.73478	8.01877	8.17002	8.53572	8.04818	8.62444	9.91583	9.43752	9.34333	9.31511	9.74594
Os04g0412700	Conserved hypothetical protein.	expressed protein	3.65916	3.97114	5.16377	4.82532	4.77393	5.94573	4.55743	3.9917	3.82203	3.88646	3.16554	3.41858	1.85183	2.63848	2.82986	2.63162	3.07497	6.84126	8.01382	7.83677	5.82731	8.7913	8.09671	8.03411	4.2482	5.18222	4.30821	3.54091	3.14828	4.6499	7.60606	7.90032	7.69243	7.87988	7.78859	7.3985	6.21451	5.57254	6.55439	5.29712	6.31953	6.66084	9.04169	8.29136	8.42129	2.69913	8.22938
Os04g0432500	Thioredoxin-related domain containing protein.	OsPDIL5-2 protein disulfide isomerase PDIL5-2, expressed	10.7446	11.2591	10.6822	10.8522	11.1774	10.4916	10.917	11.491	11.3032	11.5953	11.9611	11.3951	11.4324	11.6476	11.2545	11.658	11.6628	11.8325	11.0796	11.4337	11.0912	11.3329	11.0993	11.2623	12.1207	11.7112	12.386	12.6865	12.1129	12.2411	11.4498	11.615	11.9831	11.2854	10.9236	11.6399	11.4904	11.2095	11.8214	11.2448	11.5661	11.9299	11.1078	11.7725	11.8087	11.4297	11.2378
Os04g0445000	Potassium channel SKOR (Stelar K(+) outward rectifying channel).	potassium channel SKOR, putative, expressed	4.3094	3.9452	3.97537	4.88522	4.98943	3.92445	3.04592	2.88351	3.16894	2.5331	1.95933	2.59399	3.29708	2.19715	2.16762	3.36897	3.13197	1.9067	5.11768	2.65209	5.42447	2.91371	4.14499	4.54888	4.10072	5.30936	4.97289	2.20143	1.94752	3.54205	10.5326	9.81323	9.38125	9.8787	9.62	9.69852	9.06407	9.47254	9.67417	10.4914	10.3148	8.80947	1.71777	6.62723	3.1191	9.04118	4.5049
Os04g0457500	Gamma-glutamyltranspeptidase family protein.	gamma-glutamyltranspeptidase 1 precursor, putative, expressed	11.2381	11.2467	12.1817	10.8833	11.2328	12.0032	11.1795	11.2243	11.3302	10.7349	11.3766	10.7142	9.80937	10.0981	9.88459	9.08587	9.76224	9.16395	11.3331	10.7396	11.3594	10.6882	10.6761	10.9021	9.87664	9.75432	9.83024	9.81613	10.4921	9.85495	8.6723	9.33846	9.43966	9.39475	9.34314	9.27335	7.87222	7.91648	8.61952	8.73711	8.67379	8.47289	8.92095	9.17465	9.42352	10.38	9.37521
Os04g0480300	SWIRM domain containing protein.	SWIRM domain containing protein, expressed	11.4214	11.4872	11.0955	10.548	10.6566	10.1796	11.2926	11.7086	11.4878	11.1002	11.4001	11.1247	11.2526	11.8117	11.3856	10.7349	11.322	11.0766	10.969	10.7873	10.1329	10.9913	10.9124	10.6656	10.5165	9.8794	10.3993	10.4693	10.8889	10.7465	9.96551	9.96145	9.91431	10.0093	9.65553	10.0237	9.88489	10.3829	10.1364	10.7373	10.4163	10.3246	11.8018	11.5319	11.3133	10.4062	11.4258
Os04g0497400	6,7-dimethyl-8-ribityllumazine synthase, chloroplast precursor (EC 2.5.1.9) (DMRL synthase) (Lumazine synthase).	6,7-dimethyl-8-ribityllumazine synthase, chloroplast precursor, putative, expressed	10.2648	10.1717	9.79754	9.62426	9.54052	9.48478	9.88917	10.2124	10.1804	9.98478	10.2113	9.51684	9.43641	9.39469	9.66909	9.26227	9.43127	9.32212	11.5403	10.9515	11.5436	11.4874	11.7357	11.8044	8.85165	8.49075	9.53203	9.64303	10.0821	9.31562	11.1868	11.0644	11.2308	11.3596	11.2069	10.8492	9.16483	9.41019	10.2676	9.71977	9.6216	10.4711	12.1507	12.3054	12.0736	10.8102	11.8794
Os04g0499200	Enhancer of rudimentary family protein.	enhancer of rudimentary protein, putative, expressed	11.662	11.7578	11.4952	10.2	10.3279	10.5172	10.6609	10.241	9.84738	9.25153	9.47384	9.25716	10.0449	10.6466	10.3519	9.2066	9.33848	9.09994	11.7983	11.6068	11.4199	10.5407	10.5062	10.8066	9.55451	9.45737	10.8351	10.0562	10.0046	9.20755	11.369	11.2318	11.6373	11.2594	10.4574	10.6751	10.1938	10.5233	11.0885	10.6682	9.87992	10.9342	10.7126	11.3861	11.1091	12.4902	11.4571
Os04g0502900	Calcium-binding EF-hand domain containing protein.	EF hand family protein, putative, expressed	11.7952	11.5807	11.4377	12.2046	12.1921	11.8503	11.7562	11.4228	11.2968	11.9508	12.1909	11.3132	10.4395	11.2209	10.9673	10.319	11.1299	10.182	9.93317	10.5783	10.5457	10.0576	10.0652	10.2555	10.7012	10.5028	11.0079	11.4282	11.2737	11.1255	11.8585	11.6354	11.8819	10.9606	10.4466	11.1349	10.8954	11.4909	11.4153	10.6471	10.7456	11.2209	10.2506	10.7838	10.1885	13.2481	10.8069
Os04g0544900	Alg9-like mannosyltransferase family protein.	Alg9-like mannosyltransferase protein, putative, expressed	7.69723	8.55149	7.80069	8.49381	8.99096	8.21814	8.39067	8.59802	8.556	8.1922	9.02225	8.18798	8.52273	8.55822	8.46155	8.29171	9.03547	8.18943	8.69557	8.58876	8.67118	8.9354	9.29209	9.19061	7.70212	8.23858	8.43992	8.18734	8.50254	8.14595	8.59346	8.95523	9.15523	8.71004	8.59908	8.76289	8.04587	8.44507	8.7533	8.19789	8.4724	8.88433	10.4212	10.163	9.9123	9.05129	10.207
Os04g0577600	Conserved hypothetical protein.	No Hit	3.82139	3.13063	4.56878	3.14456	3.26154	3.99844	4.05236	4.00164	4.04679	3.57347	3.93752	4.02449	2.99942	2.87489	4.05498	2.86963	3.07116	3.61888	5.81917	4.84249	4.7107	6.01285	5.59225	5.21765	4.91693	4.96263	3.79339	3.43332	2.99769	4.28353	4.88798	5.73105	5.2339	3.67924	4.87122	4.55	6.16279	5.25673	4.64065	4.7563	4.50914	3.42955	5.92146	5.21118	5.29183	4.02249	5.49184
Os04g0589600	Glycosyl transferase, group 1 domain containing protein.	glycosyl transferase, group 1 domain containing protein, expressed	9.58975	9.45447	8.7992	9.72792	9.64023	9.36627	9.94278	9.29434	8.99808	10.2651	9.96657	10.0854	8.6647	9.22158	9.17751	9.44497	9.48268	9.35379	9.5046	9.19678	9.03584	9.91479	9.56468	9.82374	9.83248	9.5301	10.2119	10.7713	10.1664	9.72177	9.35377	8.80573	9.41594	9.52818	8.69012	9.17146	7.4132	8.76053	8.8957	9.43349	8.78469	9.26027	9.36605	9.46992	9.24932	10.2362	10.0829
Os04g0606400	Mannosyl-oligosaccharide 1,2-alpha-mannosidase (EC 3.2.1.113).	glycosyl hydrolase family 47 domain contain protein, expressed	11.6737	11.9343	11.6724	12.0631	12.1957	11.78	12.2132	12.1865	12.236	12.9003	13.0298	12.3603	12.2263	12.2262	12.1351	12.3112	12.6615	12.2942	11.6965	11.7997	12.1162	12.096	12.043	12.4583	11.9911	11.5611	11.8916	12.4789	12.6565	12.3068	12.4299	12.3562	12.8687	12.6352	12.2549	12.9146	12.0359	12.0332	12.6329	12.2425	12.1683	12.5843	12.3832	12.6837	12.8799	12.9419	12.7957
Os04g0609700	Zn-finger-like, PHD finger domain containing protein.	PHD-finger domain containing protein, putative, expressed	9.56025	9.63374	9.25208	9.54654	9.45329	9.01049	9.88699	9.61621	9.59043	9.68079	9.67885	9.02971	9.72117	9.65131	9.61199	9.0207	9.59967	9.39984	7.98615	8.6853	8.95772	8.1447	8.46995	8.69227	9.05851	8.46259	9.10512	8.62906	8.75467	8.77739	9.29502	9.03036	9.36612	9.23153	8.59922	9.1671	9.37325	9.04516	9.29909	9.27539	9.05936	9.32708	9.68288	9.43395	9.46438	9.59024	9.27731
Os04g0662800	HMG-I and HMG-Y, DNA-binding domain containing protein.	RCC2, putative, expressed	11.3959	11.3046	11.0663	11.4113	11.3382	11.1062	11.3435	11.3962	11.0737	11.2702	11.3994	11.0362	10.4536	11.0938	10.8881	10.9484	11.1256	10.9352	12.8617	12.3282	11.6001	13.317	12.988	12.8139	10.5399	10.118	10.4708	10.4947	10.7913	10.0716	12.6397	12.3205	12.3964	12.439	12.1929	12.0074	11.3947	11.5059	11.7815	11.3135	11.8985	11.6606	13.5614	13.2024	13.1038	11.8055	12.9481
Os04g0670000	Reticulon family protein.	reticulon domain containing protein, putative, expressed	7.21412	7.14987	7.1189	6.93919	7.45256	6.6377	7.53129	7.59054	7.51369	7.14822	7.3854	6.77419	8.07434	8.03732	7.5885	7.16592	7.48758	7.17526	8.74295	8.67268	8.1459	9.00601	8.72309	8.46776	7.43797	6.96729	7.2418	7.78753	7.57642	6.90497	9.16643	8.98973	9.03674	9.28696	8.86475	8.60002	7.31142	7.52041	8.1574	7.61729	7.72713	8.12785	9.25652	9.21043	8.9212	8.62562	8.64341
Os05g0110900	Protein kinase APK1B (EC 2.7.1.-).	protein kinase APK1A, chloroplast precursor, putative, expressed	11.4882	11.2725	10.724	11.9527	11.9583	11.3825	11.6464	11.7515	11.4137	12.352	12.1845	11.9045	11.4454	11.9049	11.5023	12.1344	12.4754	12.534	10.3338	11.0726	10.4552	10.5659	10.2375	10.2285	10.9839	10.7275	11.3003	12.4377	12.0801	11.3243	10.7354	10.5627	10.7605	10.8063	10.3173	10.6548	10.3935	10.7106	11.1653	10.9909	10.8355	11.0457	9.07244	9.81348	9.50653	11.5306	9.98493
Os05g0120100	Splicing factor RSZ33.	splicing factor, arginine/serine-rich 7, putative, expressed	10.3219	10.2794	9.44611	10.0621	9.82405	9.2931	10.2122	10.6811	10.807	10.5252	10.6784	10.4762	10.5213	10.7544	10.532	11.0526	11.0123	11.0503	10.8004	10.425	9.91371	11.6915	11.3354	11.3411	10.5582	10.2527	10.5105	10.9191	11.102	10.5402	10.3737	10.1708	10.2374	10.7346	10.1953	10.3613	9.97585	10.126	10.3506	10.7268	10.2057	10.5829	11.6499	11.173	11.3854	9.65543	11.4556
Os05g0125200	Protein kinase domain containing protein.	lectin protein kinase family protein, putative, expressed	4.89298	4.9201	5.00444	3.96553	4.3864	5.08192	5.99023	6.27947	6.0438	5.76142	5.53889	4.87255	6.45943	5.47826	4.87694	4.98282	5.54665	5.63477	9.3035	9.23044	9.76156	10.1347	10.7437	10.1691	7.50475	7.29159	8.57642	8.10567	7.9825	8.2366	10.0949	10.1455	10.1073	9.73025	9.55252	9.3404	9.56052	9.77438	9.75815	9.55064	9.46477	9.84564	10.5689	10.9442	10.8162	9.98114	10.9551
Os05g0144300	Type III restriction enzyme, res subunit family protein.	expressed protein	11.5818	11.6914	11.1959	12.0146	12.0927	11.4125	12.0392	12.3534	12.2166	12.2852	12.3823	11.5333	12.3878	12.3508	11.97	12.1414	12.4739	12.5642	10.6872	11.3414	10.6669	11.2502	11.0008	10.955	11.0018	10.4548	10.903	11.3745	11.8872	11.1139	10.6951	10.5017	10.6215	10.6495	9.98472	10.5875	10.702	10.6967	11.173	11.2229	10.9284	11.1724	11.9264	11.1401	11.2548	10.9777	11.3305
Os05g0156300	Protein disulfide-isomerase precursor (EC 5.3.4.1) (PDI) (Prolyl 4- hydroxylase beta subunit) (Cellular thyroid hormone binding protein) (p55).	OsPDIL2-1 protein disulfide isomerase PDIL2-1, expressed	13.6129	13.7565	12.997	13.0077	13.0872	12.5291	13.2588	13.3654	13.2639	13.0468	13.1239	12.8892	13.7134	13.7101	13.5438	13.1589	13.1805	12.8281	14.3477	14.1127	14.1105	14.4713	14.3656	14.5168	13.475	13.0978	13.5296	13.2591	12.9196	12.8271	14.0412	14.0674	14.5457	14.1184	13.7692	13.9056	12.7758	12.67	13.4358	12.5647	13.1707	13.6586	14.7335	14.9708	14.9475	13.4343	14.3915
Os05g0196200	Ndr family protein.	pollen-specific protein SF21, putative, expressed	6.13197	6.03567	7.00568	7.33268	7.25068	7.72301	6.91663	6.42619	6.0487	6.53818	7.37971	6.82196	4.66747	4.25628	3.88708	6.05279	6.13668	5.41795	8.81268	7.35163	8.28642	7.55467	8.25304	8.45605	8.35248	8.63661	8.90697	7.89588	9.34022	8.53025	7.77582	8.07501	8.24308	8.42867	7.82402	7.83603	7.05059	6.99745	7.93243	7.37009	7.85431	7.27794	7.21094	8.49177	8.95725	10.1787	9.94514
Os05g0205100	NLI interacting factor domain containing protein.	NLI interacting factor-like phosphatase, putative, expressed	2.8462	2.80121	3.05192	3.59623	2.66401	0.19265	3.88414	3.5044	3.94192	3.59193	3.45795	3.75312	2.26565	3.00896	3.70181	2.98099	3.1767	4.41449	10.8025	10.5593	7.31056	11.98	11.4311	10.9115	4.36103	4.36784	4.05344	3.88404	3.60287	4.69874	11.0485	10.4258	10.1969	11.0635	10.3333	9.52524	8.0315	7.81286	8.8271	8.26308	8.583	9.23644	12.6112	11.5307	11.762	2.26171	11.9257
Os05g0230600	WD40-like domain containing protein.	expressed protein	10.8583	10.848	10.238	11.135	11.0012	10.3241	11.113	11.0097	10.8432	11.6555	11.4333	10.7869	11.1075	11.3512	11.1965	11.0705	11.7818	11.9151	10.7662	10.9413	10.7873	11.3871	11.3404	11.4591	10.5644	10.1368	10.7599	11.3698	11.122	10.7706	11.4983	11.089	11.3754	11.5751	10.6306	10.8907	10.1235	10.4684	10.6571	11.1893	10.6773	10.9292	11.5493	11.7842	11.5864	11.1609	11.7898
Os05g0297900	Signal peptidase 18 subunit (Fragment).	OsSigP4 - Putative Type I Signal Peptidase homologue; employs a putative Ser/His catalytic dyad, expressed	6.69219	6.803	6.52909	6.61425	6.48535	6.38444	7.79334	7.42568	7.28411	8.00505	7.81379	7.8677	8.1934	7.92277	7.40385	7.61121	7.38147	7.14093	8.49547	8.0403	7.62862	8.07661	7.87239	7.74202	7.57078	6.92481	7.87006	7.812	7.47273	7.4035	7.96973	7.82158	7.81825	8.04851	7.59283	7.61754	6.86965	7.26519	7.33503	7.61764	7.4568	7.27169	8.46555	8.71813	8.62643	5.23959	7.90684
Os05g0301500	Ribophorin I (Fragment).	dolichyl-diphosphooligosaccharide--protein glycosyltransferase 67 kDasubunit precursor, putative, expressed	9.91305	10.2651	9.41471	10.8519	10.9152	10.1714	10.7007	10.9378	10.9802	11.4515	11.5226	10.9448	11.1408	11.2447	11.2215	11.1673	11.5739	11.8754	11.3754	11.2303	11.1636	11.9225	11.9412	12.1365	10.2498	9.75625	10.1044	10.8325	11.0311	10.2672	11.7337	11.5829	11.793	11.8742	11.3048	11.4389	10.5374	10.5767	11.0179	10.9918	10.8549	11.2505	12.4794	12.5746	12.7748	11.1902	12.6073
Os05g0371200	26S proteasome non-ATPase regulatory subunit 14 (26S proteasome regulatory subunit rpn11).	26S proteasome non-ATPase regulatory subunit 14, putative, expressed	11.3023	11.3336	11.1333	11.4496	11.5632	11.4159	11.3686	11.0244	10.7952	11.4231	11.4244	11.1926	10.4741	11.1942	11.2629	10.9234	11.24	11.1095	11.574	11.1991	10.778	11.6821	11.4625	11.7421	10.446	9.86326	10.669	11.1156	11.4202	10.8996	11.076	11.045	11.1811	11.0455	10.6529	10.7901	9.72515	10.2383	10.4838	10.8988	10.4258	10.629	11.8334	11.3844	11.3525	11.6662	12.0638
Os05g0411300	Conserved hypothetical protein.	bZIP transcription factor domain containing protein, expressed	10.766	10.4785	9.92128	11.7444	11.524	10.8179	11.3091	11.3168	11.013	11.7902	11.5394	11.3925	11.3145	11.5654	10.7019	11.6037	11.4715	11.0325	10.253	10.505	9.31441	10.5565	10.159	9.77876	10.8306	10.602	11.2984	12.0515	11.7361	11.1666	10.5927	10.0871	10.1013	10.4564	9.77029	10.1076	9.97056	10.6391	10.4435	11.1408	10.5921	10.5139	10.5478	10.1218	9.87764	8.43939	10.0849
Os05g0412900	Conserved hypothetical protein.	No Hit	6.26095	6.59692	6.62012	4.29793	4.50689	5.11932	7.85474	8.61566	8.65077	7.35547	8.30503	7.80931	5.55786	5.62456	5.55795	6.30238	6.75913	5.8835	6.40436	5.15484	6.25299	5.72272	6.69676	6.85322	5.98685	5.82585	3.9319	5.68674	7.55613	4.99307	4.43623	5.21803	5.79627	4.36056	5.68969	5.40819	5.61762	5.06407	5.26338	4.58822	5.29742	5.00836	6.49132	6.791	6.83306	7.52661	6.98963
Os05g0426800	Conserved hypothetical protein.	expressed protein	3.15858	2.6278	3.95621	1.87638	2.54134	3.59786	3.77883	3.31038	3.27755	3.13121	2.5003	3.05477	3.05713	2.5111	2.75535	2.14285	1.81351	1.76491	10.1934	9.35912	8.05813	10.2321	10.0453	10.4312	2.71692	3.85811	4.88366	2.82953	3.38188	6.11566	6.67736	7.01579	6.83261	7.07929	6.93908	6.20982	6.05534	5.19015	5.65842	5.5142	5.73661	5.65296	11.9048	10.9638	11.1844	9.00883	11.6607
Os05g0427200	Glycosyl transferase, family 31 protein.	galactosyltransferase, putative, expressed	7.1648	6.66826	6.91186	7.20007	7.00337	6.83108	6.06383	5.17359	4.93865	3.63845	3.97022	4.44973	4.67096	6.60336	5.09922	4.97879	5.63299	4.76729	4.42976	5.18543	6.18564	3.50205	3.95304	4.90038	0.895966	1.47213	3.85351	3.61833	2.45117	-2.02948	4.53883	4.26092	4.89011	4.62708	3.71474	4.91643	5.13808	4.9639	5.4899	0.386095	4.55894	4.90512	5.24058	6.18931	5.48193	5.56022	4.89288
Os05g0446300	G10 protein homolog.	G10 protein, putative, expressed	10.8324	11.2313	10.7229	11.3693	11.6103	11.1415	11.1276	11.4868	11.3624	11.3973	11.9141	11.7168	11.5271	11.6927	11.3915	11.7157	11.6447	11.5658	11.0659	11.3782	10.7813	11.4921	11.1733	11.2934	11.564	11.3259	11.9414	12.2116	12.2348	11.7651	10.6775	10.8295	11.195	10.878	10.7682	11.2856	10.5389	10.45	11.1296	10.5879	10.7962	11.3851	11.3185	10.9643	10.9153	10.8157	11.1527
Os05g0452900	Conserved hypothetical protein.	phosphatidic acid phosphatase-related, putative, expressed	8.83793	8.87556	8.65652	9.03231	9.33769	8.88359	9.6933	9.65459	9.45556	9.69007	9.65861	9.46242	9.85318	9.97332	9.29712	9.71034	9.7436	9.24355	9.86711	9.58795	9.0686	9.69092	9.54727	9.29603	9.21045	8.93598	9.78956	10.3811	9.754	9.38217	10.4174	10.3967	10.4801	10.3186	10.3108	10.2586	9.44381	9.72876	10.0111	9.94586	9.88735	10.0364	9.9219	9.9476	9.73836	9.79252	9.95458
Os05g0459000	C-myb-like transcription factor (Fragment).	MYB family transcription factor, putative, expressed	0.889677	-0.111162	2.52557	3.35751	3.37591	2.77653	2.74491	2.06771	3.31469	3.25141	3.20037	3.11665	3.4403	3.77796	3.41276	3.99623	3.84153	4.33698	2.87308	3.45593	3.2815	3.68304	3.24819	3.02004	4.06281	4.25975	2.45605	0.972473	2.51668	2.05562	4.5464	4.04713	4.29293	4.68387	4.16154	4.01523	3.34776	4.06237	3.81278	4.40609	3.61413	3.78568	4.90815	4.06998	4.34259	1.81781	4.16976
Os05g0494500	Conserved hypothetical protein.	domain of unknown function, DUF250 domain containing protein, expressed	11.4462	11.6352	11.4715	10.5297	10.6716	10.4544	10.8862	11.6101	11.9639	11.592	11.5751	11.3623	12.4728	12.6677	12.3959	11.4271	11.8935	12.6782	11.906	12.1979	12.2256	12.5683	12.3687	12.4448	12.0262	11.701	11.5813	12.2101	11.9475	11.7027	13.076	12.9781	13.3314	13.1831	12.8116	13.0328	12.0915	12.1639	12.8338	12.294	12.0977	12.7672	12.9173	12.9049	13.2841	13.1522	12.7675
Os05g0566400	Blast and wounding induced mitogen-activated protein kinase.	CGMC_MAPKCMGC_2	10.1754	9.52276	10.9688	9.15577	8.80628	9.28764	10.074	9.45643	9.67053	6.96146	7.50131	7.10504	9.27208	9.39926	8.82859	7.71016	8.1679	7.37524	9.83786	9.54409	10.0496	8.75947	9.06005	8.58723	8.92018	7.86109	8.44344	8.00385	7.73917	7.76631	9.75578	9.21261	9.62246	10.2535	9.41462	9.65968	7.8361	8.20878	9.19255	8.68996	8.01907	8.68696	7.70646	8.73336	7.70954	10.0833	8.14239
Os06g0144800	GTP-binding membrane protein LepA homolog.	GTP-binding protein GUF1, putative, expressed	10.511	11.0659	9.76544	9.94167	10.0278	9.30765	10.6004	10.253	10.1434	9.9994	10.1198	9.68783	9.90657	9.9317	10.09	9.46414	10.1749	9.43095	9.34226	9.28648	9.36109	9.7403	10.0519	10.0921	9.00693	8.31956	8.82834	8.53389	8.61503	8.72693	9.74823	9.38552	9.69108	10.077	9.06036	9.43797	8.18699	8.66222	9.04502	8.88666	8.7334	9.56112	11.2861	10.4688	10.507	9.76097	10.579
Os06g0208200	(No Hit)	hypothetical protein	5.9855	5.87952	6.32244	5.51861	5.7076	5.12563	5.94641	5.11538	4.70388	5.74266	5.96309	6.31587	4.11656	3.98931	7.22731	3.8897	4.25459	4.2197	8.28082	7.88707	7.92569	9.13713	8.85086	8.641	3.22851	4.96475	5.06817	5.49201	5.58198	6.57129	8.60717	8.29388	8.84532	8.51855	7.90986	7.77254	6.03504	6.33639	7.17259	5.93207	6.93681	7.21857	9.61805	9.85621	9.74623	8.85293	9.34395
Os06g0212900	Heat shock protein Hsp70 family protein.	DnaK family protein, putative, expressed	9.2776	9.572	9.70095	10.2219	10.4293	10.9848	7.84283	6.13036	5.99698	4.62882	4.80224	5.53544	4.71342	4.30639	4.43439	3.469	4.17581	3.82232	8.34382	9.54281	8.54808	7.56279	7.68984	7.94531	6.02609	5.91402	6.75641	6.54957	6.39498	7.4025	6.52476	6.51006	6.82702	6.68179	6.72999	5.95884	4.64994	4.64483	5.53986	4.92061	5.62695	6.13321	7.83235	8.20682	8.3711	8.30648	8.65723
Os06g0554300	Hypothetical protein.	expressed protein	8.10396	8.00242	9.32365	6.66372	6.8764	8.36421	8.12669	7.78578	7.84384	6.69529	6.85642	6.46863	7.56542	7.79653	7.22479	6.85097	7.05675	7.1209	12.1559	10.6222	11.7731	11.2327	11.5961	11.7088	8.47945	8.65938	8.66046	7.50015	7.96737	8.41633	11.6355	11.5289	12.3108	11.6546	11.1958	11.3271	10.0228	10.1907	11.1933	10.1894	10.1841	11.5859	11.8256	12.9634	12.9133	10.954	12.1571
Os06g0584200	Conserved hypothetical protein.	expressed protein	8.19849	8.66249	7.64581	8.07088	8.3209	7.48477	8.92693	9.45095	9.2716	9.06598	9.3413	8.30155	9.88389	9.66989	9.17466	9.18774	9.35745	9.73614	8.7508	9.38901	9.03567	9.71796	9.72781	9.61306	8.76659	8.64698	9.16729	9.30201	9.64419	8.59179	9.73226	9.62516	9.56276	9.7618	9.42769	9.35712	9.20621	8.95796	9.28602	9.06323	8.79016	9.233	10.3622	10.3966	10.542	9.4182	10.5559
Os06g0585200	Conserved hypothetical protein.	No Hit	8.46631	8.52313	7.50487	8.29771	7.96529	7.21575	9.07144	9.29517	9.05092	9.30857	9.07492	8.04294	9.77222	9.73263	9.29947	8.66823	8.95082	9.51298	8.85214	9.41535	9.03235	9.27355	9.25812	9.00082	8.89073	8.51714	9.12178	9.62002	9.24077	8.91349	10.0075	9.46654	9.5525	10.0932	9.21161	9.14608	7.05858	8.79856	8.99474	9.48272	8.91648	8.98674	10.0621	10.2133	10.0745	9.51458	9.67192
Os06g0622000	CW-type Zn-finger domain containing protein.	CW-type Zinc Finger, putative, expressed	5.21518	6.18969	4.55569	5.4164	5.84627	5.04197	5.14251	5.2231	5.13568	5.47813	5.49563	5.22083	4.92313	4.92887	4.99577	5.05839	6.22196	5.86385	6.79341	7.20982	6.67664	6.93075	6.97187	7.74202	6.41085	6.13423	6.94358	5.56779	6.095	6.2313	6.10766	6.30979	6.50209	6.55936	5.88515	6.10497	6.04121	5.9602	6.06195	6.06901	6.03328	6.80851	9.31199	8.31413	8.01911	6.95778	9.00347
Os06g0659600	Hypothetical protein.	No Hit	5.4342	5.44512	5.70656	5.8981	6.15406	6.20307	5.50231	5.31075	5.24397	4.75608	5.37017	6.18657	5.36939	5.72921	5.8138	5.31196	5.74271	6.1686	4.50792	4.83155	4.8459	5.20756	5.07961	5.21747	4.6892	6.30368	4.88978	4.76717	4.91608	5.33111	4.7068	4.9975	4.99662	4.99609	5.2189	5.03479	7.9199	5.81087	4.94586	5.95008	5.74759	4.86556	6.06879	5.08953	4.80954	5.70482	4.76079
Os06g0666600	Glyceraldehyde-3-phosphate dehydrogenase precursor (EC 1.2.1.12).	glyceraldehyde-3-phosphate dehydrogenase, putative, expressed	8.2496	8.82616	8.18975	7.01347	7.57322	7.44875	5.72937	5.80974	5.76552	5.19003	5.73846	4.16872	6.99358	5.32677	5.14503	4.65581	5.02213	6.91511	8.36943	8.62179	7.58844	7.76245	7.93906	8.07234	3.93247	4.67334	5.57868	5.96818	6.18958	4.59448	7.31627	7.07683	7.27505	7.44653	7.51086	6.29752	5.01511	4.20985	5.0882	4.53718	5.29948	4.94841	10.7076	9.4449	9.26299	7.31118	10.073
Os06g0683900	Hypothetical protein.	expressed protein	3.59376	2.97644	3.53964	2.65005	3.62797	3.38903	6.58092	6.15976	6.16234	4.23576	5.09714	4.73506	3.81967	3.82233	2.37679	4.20866	3.2729	3.24378	11.6204	11.6792	8.87964	12.1339	11.4918	10.9848	4.21389	7.46244	7.06465	3.7872	6.88649	8.02891	12.0219	11.675	11.5354	11.8544	11.4352	10.8087	10.181	9.8528	10.6611	10.2208	10.1318	10.9737	13.315	12.6254	12.7488	5.96831	12.5689
Os06g0710900	Hypothetical protein.	expressed protein	9.64925	9.55097	8.74408	10.7528	9.96896	9.60021	10.2385	9.72507	9.94732	12.4504	11.5526	11.4478	12.3774	11.5504	11.7454	12.7537	12.1388	12.4653	10.3586	10.9187	10.0738	10.5738	10.067	10.473	9.47096	9.30611	9.4726	11.968	12.0632	11.3267	11.08	10.4406	10.4259	10.8992	10.0956	10.5788	10.986	11.2063	11.0167	11.604	10.9527	11.5041	11.0217	10.3533	10.5379	11.2386	11.1045
Os06g0731100	Zn-finger-like, PHD finger domain containing protein.	PHD-finger domain containing protein, expressed	8.11794	8.4247	7.87085	9.30119	9.36229	8.67623	9.508	9.44259	9.22787	9.92097	10.179	9.52082	8.93625	9.30882	9.12584	9.18002	10.0019	9.73556	9.69133	9.82529	9.70075	10.1202	10.3279	10.0196	9.67916	9.06446	9.93384	10.7491	10.6421	10.3235	10.2766	10.4287	10.4542	10.0813	9.91679	10.0484	9.74235	10.2605	10.4295	10.4724	10.4294	10.6241	11.8678	11.4941	11.3457	11.0095	11.4545
Os07g0100600	Peptide transporter.	peptide transporter, putative, expressed	6.41826	5.66445	6.74311	7.15762	6.62242	6.56271	5.09973	5.27536	5.10874	3.89307	4.63574	3.99275	5.52028	6.2418	5.63012	5.12337	5.529	6.22062	6.19865	4.78454	6.29877	5.54551	6.37843	6.49474	4.01992	4.42182	4.70221	3.96358	5.25414	4.05783	4.11206	2.76066	3.46465	4.06042	3.00491	4.38378	4.63353	4.32733	4.9027	4.34242	4.38701	4.35376	2.67914	7.48635	3.92751	9.11649	6.38202
Os07g0161000	TPR-like domain containing protein.	tetratricopeptide repeat, putative, expressed	10.6647	10.4928	9.99821	10.9437	10.754	10.1482	10.885	10.4756	10.29	11.1052	11.1101	10.3647	10.1236	10.2095	10.0034	10.0414	10.4127	9.64075	10.0872	10.1987	10.1432	10.261	10.2387	10.3409	9.8301	9.01264	9.95702	10.059	10.4686	9.90208	10.4847	9.90749	10.3424	10.6884	9.59593	9.82052	9.13253	9.41594	9.95581	9.95537	9.72958	10.204	11.1531	11.418	11.1125	10.9662	11.0171
Os07g0184300	40S ribosomal protein S15 (Fragment).	40S ribosomal protein S15, putative, expressed	9.23969	9.02268	7.62937	8.84341	8.49042	7.56325	9.27481	9.43466	9.22735	9.39332	9.20812	8.92734	9.63959	9.21658	9.24636	9.24554	8.90537	8.99776	10.4274	10.3784	9.81054	11.1195	10.7354	10.6846	9.23798	8.71051	9.15696	9.33131	9.44228	9.19681	10.7567	10.2975	10.438	10.986	10.3253	10.0007	8.64902	8.75022	9.43227	8.89738	9.22368	9.49655	11.1796	11.1349	10.9488	8.92628	10.6402
Os07g0230500	Excinuclease ABC, C subunit, N-terminal domain containing protein.	GIY-YIG catalytic domain containing protein, putative, expressed	3.74293	3.3107	4.13453	4.32872	4.24367	4.07777	4.95101	4.71532	4.39526	4.4643	4.32403	4.29825	4.24248	4.7983	4.26092	4.99168	5.06114	4.39488	7.95638	7.18116	4.45031	8.63742	8.2848	8.17181	5.01664	5.19807	6.3511	3.98669	3.55887	4.67619	8.5479	8.05198	8.25509	8.58744	7.92855	7.82053	7.10253	7.73133	7.82096	8.08645	8.0654	7.75862	8.89226	8.44221	8.43814	5.3736	8.63898
Os07g0283200	Conserved hypothetical protein.	expressed protein	4.41927	4.78739	4.23079	4.82276	5.12648	5.10353	5.22277	6.03825	5.30565	5.33316	5.60546	5.02508	5.72324	6.0955	5.426	4.50212	5.48662	5.85715	4.73788	4.80939	6.91949	4.51927	4.80148	4.86789	4.71097	5.4301	4.87531	5.37246	5.73435	4.95378	4.25609	3.90658	4.74837	4.6326	2.39766	4.13589	4.98138	4.42776	4.20028	4.54537	3.63641	4.64005	6.62071	6.24176	6.44725	5.08498	6.35118
Os07g0468500	Leucine-rich repeat, plant specific containing protein.	leucine rich repeat protein, putative, expressed	3.27684	1.97307	2.77603	1.46838	1.10096	2.53436	1.93173	5.68855	0.428305	0.697389	1.96476	3.05646	0.994733	4.78092	3.99887	5.99715	1.63548	3.74434	3.36392	1.85341	3.73084	1.533	1.6619	-0.0651117	4.82093	4.73537	4.23844	6.00692	6.3742	3.82945	2.40624	3.20855	2.27603	1.63356	2.79061	2.7439	4.80816	4.03579	4.59478	4.68554	4.01431	4.93495	2.37918	3.28641	1.5312	5.65685	3.09132
Os07g0474300	Conserved hypothetical protein.	expressed protein	2.17694	0.658396	1.21523	2.16648	2.82805	1.20966	2.83936	2.09611	1.8821	2.97197	1.88318	1.90394	-0.0537911	0.0935914	2.64795	0.458777	1.88157	0.814358	9.28693	9.0424	6.15377	10.1839	9.64107	9.06128	3.0024	4.41975	4.0169	2.44853	4.07583	3.77703	8.63186	8.6678	8.4694	8.92527	8.90452	8.28189	6.1496	6.19953	6.74509	6.02293	6.81783	7.23331	10.4615	10.095	9.94955	1.91456	9.7355
Os07g0495000	Protein of unknown function DUF923 family protein.	cupin 2, conserved barrel domain protein, putative, expressed	10.5522	10.3759	10.5686	9.85492	10.0201	9.78066	10.1641	10.5883	10.1387	9.7516	10.2701	9.41047	9.68996	9.88633	9.57583	9.39531	9.9085	9.18504	10.6457	10.7033	10.3373	10.2135	10.4579	10.3875	10.3035	9.78698	10.7851	10.2673	10.4475	9.47834	10.6383	10.497	10.7177	10.809	10.1633	10.684	9.72369	10.0546	10.4683	9.7093	9.95962	10.5562	10.7688	11.2663	10.6759	11.788	10.8854
Os07g0498400	Protein kinase domain containing protein.	leucine-rich repeat receptor protein kinase EXS precursor, putative, expressed	7.93018	7.31443	7.27219	7.88064	7.31591	8.20251	8.59992	8.49583	8.11576	11.1255	10.8019	10.3734	6.37419	6.09146	5.76504	9.4309	9.50412	8.91049	10.4702	10.8971	10.4556	10.7741	11.238	11.1299	9.10088	9.64001	10.826	11.3064	12.2855	11.698	11.5559	11.0472	11.1211	11.7583	11.3525	11.4018	9.67177	9.26672	10.2384	10.313	9.59234	10.3461	11.9987	12.2417	12.5448	11.8279	12.4953
Os07g0507200	Cloacin family protein.	targeting protein-related, putative, expressed	6.03032	5.7933	5.7059	6.13001	6.90964	5.83478	6.8721	5.77197	5.612	5.633	5.9186	5.79671	4.60732	4.61513	5.21005	5.05853	5.39675	5.12219	11.3951	11.2646	8.78314	12.1493	11.9314	11.6768	6.15299	5.30159	6.19787	4.7568	5.48487	6.28138	11.7123	11.3949	11.4852	11.6596	10.9779	10.5404	9.61137	9.2001	10.1199	9.54049	9.74037	10.3288	13.3907	12.5698	12.5672	6.98239	12.9102
Os07g0510600	Conserved hypothetical protein.	No Hit	6.93318	6.50228	7.12626	7.09205	7.04441	7.10785	6.2962	6.36766	6.44095	4.92091	3.93187	4.19028	6.39842	6.43496	6.20744	4.85646	4.66638	5.84425	5.78479	5.63471	5.66678	4.84734	5.67418	5.18833	5.10255	4.7253	4.87178	3.21151	4.15974	5.45133	5.60368	5.3039	5.47165	5.45472	5.88143	5.72457	4.87102	4.91075	4.58149	4.55755	4.90229	3.98443	2.67321	4.73242	3.43732	5.38347	4.57504
Os07g0572500	Hypothetical protein.	expressed protein	5.97297	6.29323	6.26401	5.91946	6.45437	5.93912	6.07397	6.55882	6.52471	6.73905	7.14299	6.82981	7.83297	8.00854	7.50775	7.49306	7.46147	7.83344	5.52746	6.30831	5.46271	6.62	6.31932	6.19968	7.12766	6.4094	6.81651	7.57665	7.96537	7.36002	6.25702	6.67269	6.91467	6.2097	6.69704	7.22967	8.49104	8.36376	8.06122	8.18495	8.4392	8.14075	6.61855	6.06147	6.30902	7.10358	6.96778
Os07g0588200	Actin-binding FH2 domain containing protein.	formin, putative, expressed	10.7302	10.2691	10.5674	10.1614	10.0201	9.79917	10.8081	10.6033	10.6597	10.2665	9.89073	9.64304	10.5916	10.5362	10.5112	10.1859	10.4803	10.4241	10.1752	10.599	10.7431	9.36852	9.39041	9.70225	9.75441	9.74731	9.67254	10.539	10.8603	10.6223	10.2416	9.73135	9.84061	9.97908	9.31009	10.0273	9.84755	10.2944	10.2331	10.3491	9.88724	10.3851	8.18777	10.3053	10.3464	12.0809	10.3788
Os07g0676200	Hypothetical protein.	No Hit	6.87821	7.00871	7.0802	7.22557	6.94332	7.29565	7.82824	6.20329	6.31035	7.51902	7.01805	7.31432	5.6056	4.8342	6.02911	5.77884	6.57608	5.48803	5.23541	5.30344	6.93868	4.632	5.38965	6.30757	6.25403	6.7486	7.05869	6.00467	5.91674	6.95841	6.53067	6.10652	6.83661	6.21474	5.58322	6.33768	6.28118	7.04487	7.02213	7.41478	6.71959	7.45753	7.85952	7.31971	7.34898	7.94326	8.02283
Os07g0681700	Glycosyl transferase, family 8 protein.	glycosyl transferase, family 8, putative, expressed	4.11214	3.21711	5.07677	4.0675	4.06722	5.09776	3.63004	3.55856	2.6132	5.25213	5.58465	4.62181	4.05309	3.46619	2.87213	4.12021	4.90725	4.76452	9.12034	7.95626	9.58387	8.61072	9.18388	9.41097	4.27587	5.58035	5.52524	5.3556	5.79294	5.9562	8.38173	8.17578	8.64472	8.43564	7.5057	7.93351	6.61694	6.67282	7.56283	7.50393	7.0346	7.76994	9.4695	10.248	10.1167	9.09134	9.87528
Os07g0686600	VQ domain containing protein.	VQ domain containing protein, putative, expressed	5.6953	5.1446	6.32576	4.38923	4.52838	5.78943	4.10347	3.9695	4.83616	4.31387	3.88352	4.30567	4.45359	5.18573	5.28949	5.73447	6.44156	7.71744	5.2671	6.02726	5.50167	5.28128	5.55379	5.34684	5.68955	5.87041	5.6197	5.89051	6.139	6.95032	6.77095	7.24205	7.01723	7.17661	7.34725	7.17165	5.15789	5.71156	5.8808	5.32831	5.63997	5.1501	6.06998	6.37767	6.26992	6.47503	6.75821
Os07g0695900	Myb, DNA-binding domain containing protein.	MYB family transcription factor, putative, expressed	10.0593	10.5705	10.1361	9.96764	10.3156	10.3169	10.6963	10.7943	10.4551	10.6133	10.9062	10.3759	10.2124	10.5113	10.5335	10.0637	10.6224	10.4307	9.37474	9.63414	9.40033	9.93978	9.73168	9.6081	9.94387	9.32046	10.0142	9.88036	10.1134	9.32323	9.50235	9.56722	9.84055	9.52531	9.16928	9.54911	9.60308	9.82532	10.0995	9.95418	9.77075	10.4334	10.9254	10.1137	9.85374	10.5799	10.5754
Os08g0112900	Lipolytic enzyme, G-D-S-L family protein.	GDSL-like lipase/acylhydrolase, putative, expressed	1.62972	1.42462	-0.183847	2.70529	2.5699	3.07505	1.6826	3.68822	0.29198	2.86544	2.40531	1.02169	2.48733	0.930258	0.451226	2.76442	3.26037	2.73496	9.35349	8.67938	2.28565	9.29493	9.28389	9.68225	3.47732	5.3003	4.55165	3.07622	2.25643	2.09615	3.64196	3.23131	3.64488	2.92911	2.50265	3.05508	2.15282	3.3044	3.6325	2.72605	2.33064	3.2148	11.4326	10.4051	10.3693	3.43188	10.8167
Os08g0129700	NAD-dependent epimerase/dehydratase family protein.	NAD dependent epimerase/dehydratase family protein, putative, expressed	12.4018	12.3962	12.8031	11.512	11.7666	12.0936	11.2446	10.7915	10.629	10.7242	10.7804	10.4015	10.8545	10.9849	10.7527	10.5736	10.7149	10.336	11.4921	11.1002	11.4732	10.3145	10.7747	11.0086	10.4325	9.97929	10.6094	11.2012	10.8615	10.0636	11.5497	11.336	11.6149	11.5488	10.9986	11.2331	10.6066	10.5915	11.205	11.2179	10.77	11.1434	10.3441	11.5688	11.089	12.7794	11.5022
Os08g0141400	FAD-dependent pyridine nucleotide-disulphide oxidoreductase domain containing protein.	external NADH-ubiquinone oxidoreductase 1, mitochondrial precursor, putative, expressed	6.93172	7.02489	8.32182	6.82397	6.49642	6.88308	7.16774	7.02843	6.8793	8.42628	8.30669	8.26735	7.95666	7.68479	7.37923	6.92524	6.89395	6.99429	9.18546	8.74546	9.38437	8.17198	8.20934	8.51801	7.70313	7.41086	7.76606	8.97197	8.37047	8.30137	9.98156	9.88768	10.6002	10.6107	10.1805	10.3059	8.26806	8.45389	9.44251	8.92681	8.56688	8.93893	9.8992	10.7585	10.4664	8.49409	9.92788
Os08g0159000	Myb, DNA-binding domain containing protein.	MYB family transcription factor, putative, expressed	10.4935	10.584	10.6144	11.5012	11.6513	11.4108	10.3564	11.0475	11.0026	10.9345	11.3937	11.0779	10.9442	11.2493	10.7407	11.3607	11.6184	11.4312	10.8526	10.5475	10.4256	11.167	11.1404	10.8318	10.1597	9.49074	9.63545	10.7868	11.0047	10.4621	11.0414	11.0833	11.304	11.1899	10.9773	11.1302	10.1416	10.3307	10.8663	10.5264	10.3896	10.9341	10.6814	11.2791	11.2857	11.2929	10.8523
Os08g0193600	Cyclin-like F-box domain containing protein.	OsFBX266 - F-box domain containing protein, expressed	6.96377	7.00559	6.46788	6.56898	6.64843	6.27704	8.01882	7.99015	7.90918	7.75532	7.76039	7.07749	7.98259	8.37962	7.58857	7.67382	7.88952	7.54495	6.41998	6.92335	6.04101	7.01707	6.60119	6.3534	6.08626	6.16195	5.46726	6.94823	7.39376	7.10454	3.88233	4.45284	3.63545	4.23663	5.06135	5.06159	6.37162	5.05382	4.87573	5.37838	5.26218	4.67953	9.21432	8.27474	8.7022	8.60719	8.85337
Os08g0200100	Acyl-[acyl-carrier-protein] desaturase, chloroplast precursor (EC 1.14.19.2) (Stearoyl-ACP desaturase) (Delta(9) stearoyl-acyl carrier protein desaturase).	acyl-desaturase, chloroplast precursor, putative, expressed	11.4456	10.8539	12.4838	9.35659	9.34761	11.4381	9.48707	8.97329	9.33638	6.03638	6.09101	6.34347	11.8912	10.4053	10.3573	10.2983	9.70883	9.67163	12.7808	11.6681	13.008	13.0105	12.9507	13.4821	6.37411	7.62102	6.37496	6.36936	7.80684	9.00768	10.1785	10.6987	10.1631	10.5249	10.1304	9.77217	9.10414	8.58333	8.99056	8.35001	8.90063	9.13407	7.66382	7.31651	7.73517	4.75638	7.02964
Os08g0207800	Peptidase aspartic family protein.	expressed protein	4.69211	2.9049	4.43147	3.6009	3.14134	3.17265	4.34204	3.61732	3.61432	3.40016	3.25667	4.11192	3.71763	3.10824	3.60942	4.19157	4.94264	5.95494	5.66275	5.27512	5.72134	4.90994	4.71592	5.8519	6.78469	7.05949	6.85431	6.74289	6.33867	6.24715	6.42006	7.04363	7.59397	6.28313	5.50861	5.97118	5.39583	5.11913	5.87252	5.51706	5.35584	5.07612	3.31489	2.38958	3.63807	2.8189	3.02692
Os08g0208200	Peptidase aspartic family protein.	expressed protein	2.80366	1.553	2.48402	3.39859	3.89147	3.11734	3.15031	3.53187	4.01712	3.78011	3.63904	3.27568	3.69961	4.10888	2.45892	4.24398	4.30168	4.38835	6.10166	3.25461	5.97841	4.60446	6.12847	6.51825	1.81798	5.24963	4.16573	2.81916	2.31151	2.22027	1.39554	1.7854	1.62155	1.18476	2.80761	1.03297	2.37841	3.27661	2.18985	1.07268	2.01471	1.75647	6.24151	7.94585	7.8487	7.24264	7.67536
Os08g0330900	Cyclin-like F-box domain containing protein.	OsFBX286 - F-box domain containing protein	5.98264	5.99424	5.65364	6.03487	6.0897	5.22128	7.48512	7.41527	7.33157	7.02437	6.8678	7.17546	8.33759	8.17329	8.15631	7.98432	8.24879	8.31513	7.46161	7.08301	7.03997	7.65189	7.85164	8.14024	7.07991	6.62271	7.11296	5.58771	6.39587	6.35833	8.4988	8.34408	8.94541	9.41797	8.4349	8.38995	7.37206	7.352	8.21254	6.87345	7.14148	8.06513	8.89077	8.49898	8.54383	6.89873	7.34788
Os08g0401500	Mandelonitrile lyase-like protein.	HOTHEAD precursor, putative, expressed	2.93793	2.6	3.80653	2.79046	2.34053	2.94754	2.58816	2.56892	1.83365	1.58757	1.71327	3.02171	2.48044	2.97203	0.821756	2.72129	2.0228	2.56087	9.93741	8.04382	11.2238	8.09645	10.0277	10.2987	4.17614	3.58131	4.74802	3.20465	3.70206	3.85929	1.97562	1.62664	1.94557	0.943326	1.29304	1.12225	2.87978	-0.0745706	-0.191538	1.02037	-0.509119	1.29136	6.0285	8.60519	8.15746	8.33985	8.21399
Os08g0421800	Mitogen-activated protein kinase kinase kinase 1 (EC 2.7.1.-) (Arabidospsis NPK1-related protein kinase 1). Splice isoform 1S.	STE_MEKK_ste11_MAP3K	2.90834	3.33218	2.93621	3.89725	3.69632	3.61775	3.88725	3.40341	3.54975	3.78217	3.16238	2.59721	2.7427	2.88673	2.37859	4.10947	3.29949	4.23524	9.60968	9.35605	6.60345	10.1321	9.85698	9.85501	-1.14185	4.1544	4.59316	3.43597	3.71284	4.94789	10.0831	9.76513	9.8955	10.0944	9.38355	8.99751	7.62726	7.509	8.32266	7.75737	7.96784	8.63784	11.4439	10.5886	10.6152	2.18221	10.6544
Os08g0453700	RbohAOsp (Fragment).	ferric reductase, putative, expressed	6.10685	6.35404	6.37432	9.46019	9.11289	9.66389	8.28332	8.66619	9.14651	11.1086	10.8681	10.2382	11.6471	10.8868	9.6736	10.3331	11.0356	9.76666	9.02293	9.64266	9.31223	9.11363	8.69865	9.10082	8.62569	9.00264	8.23586	10.0537	10.2473	9.97409	10.0405	9.79681	10.1974	10.3084	9.71186	10.2383	9.31919	8.90851	9.41137	9.0502	8.79421	9.20979	5.86694	9.13376	9.04344	11.3012	9.09938
Os08g0454600	Hypothetical protein.	expressed protein	7.58642	7.8029	6.23818	5.78927	5.64039	5.13413	7.75521	7.78197	7.70635	7.08411	6.87002	6.88747	7.86595	8.08731	7.73087	6.2041	6.22031	5.44607	8.24987	8.30313	7.86996	8.42233	8.45319	8.25352	7.69916	6.94018	7.18538	8.39763	8.79575	7.81859	7.95548	7.76229	7.45461	8.02964	7.91434	7.79063	6.01109	6.30902	6.84476	7.35633	7.47679	6.65733	9.77831	9.44332	9.39597	8.22252	9.64433
Os08g0512400	Protein of unknown function DUF296 domain containing protein.	AT hook motif domain containing protein, expressed	12.0927	12.0928	11.1434	13.1522	12.7415	11.9436	13.3876	13.361	13.1256	13.5677	13.3641	12.9215	13.5341	13.5231	13.1938	13.974	13.7927	13.9529	12.3031	12.6928	11.7417	12.9173	12.5969	12.5186	12.665	12.1377	12.7184	13.3174	13.5515	12.5636	12.2573	11.9222	12.0897	12.3549	11.5756	12.049	11.251	11.4574	12.3699	12.6387	12.0859	12.1625	13.3541	12.435	12.5848	11.8773	12.7694
Os09g0133200	Glucose/ribitol dehydrogenase family protein.	dehydrogenase/reductase SDR family member 2, putative, expressed	11.7234	11.7937	11.7525	12.1766	12.147	12.0709	12.0971	11.867	11.6416	11.8583	11.8399	11.9934	11.6428	12.0104	11.9514	11.9115	11.8836	11.8967	12.5117	12.0638	12.0083	11.9184	11.6971	12.0348	11.9253	11.9935	12.6107	12.9399	11.9305	11.9843	11.7783	11.7563	12.1606	11.8829	11.4908	11.8062	11.0835	11.3892	11.8195	11.7499	11.3556	11.9945	11.9891	11.6556	11.5522	12.2758	12.2256
Os09g0277800	Enoyl-ACP reductase (Fragment).	enoyl-acyl-carrier-protein reductase NADH, chloroplast precursor, expressed	5.31394	5.79207	4.94463	6.87394	7.2699	5.89669	7.35407	7.63119	7.26464	8.4882	8.40528	8.13807	7.09535	7.23411	7.16252	9.51726	9.90069	9.83842	11.3111	10.3344	11.3272	11.2316	11.9894	11.6385	8.22005	7.25475	8.77342	8.60662	8.45704	8.10571	9.74729	9.63285	9.62768	9.88512	9.1164	8.87561	7.73029	7.90196	8.9446	8.33902	8.40714	8.89391	12.0045	11.6825	11.4272	9.56902	11.4719
Os09g0286300	Protein of unknown function DUF566 family protein.	expressed protein	3.46241	1.42329	2.37791	3.08456	3.12205	3.39807	3.91615	3.59584	2.94889	3.8962	2.18716	3.16131	3.11593	2.85859	1.68416	2.54517	2.21333	3.02569	8.31879	8.06739	5.76498	9.13412	8.79692	8.71129	2.93619	3.26471	5.44269	1.19458	2.85393	1.5045	8.66553	8.56363	8.54619	8.4687	7.89017	7.66365	6.17311	6.00007	6.92062	5.83166	6.50735	7.02821	10.1774	9.67151	9.76743	2.55808	9.44063
Os09g0380600	Conserved hypothetical protein.	expressed protein	1.7096	0.875682	3.51158	2.62695	2.58236	2.80088	2.01601	1.56639	3.05272	1.98304	1.45602	2.45521	0.137355	2.90322	0.889143	2.65346	2.19673	2.86206	2.47194	1.50415	2.7144	1.31013	2.41284	2.38109	3.82952	4.33129	3.44141	2.13567	0.523694	3.45985	2.9572	2.20751	3.12649	3.60692	1.87946	2.87406	2.23821	-1.11104	3.24558	1.33038	-0.97537	2.55132	3.02917	1.13058	2.5805	2.79283	2.85458
Os09g0400000	Sinapyl alcohol dehydrogenase.	dehydrogenase, putative, expressed	12.3789	12.3547	11.4704	10.4867	11.0858	10.8809	12.686	13.3475	13.0215	11.1872	12.0025	11.4744	10.7833	11.3282	10.9376	11.6511	11.6353	10.9237	11.7579	11.7295	10.6071	11.6862	10.8928	10.6437	12.6015	12.3081	12.6352	13.1718	13.303	12.2591	7.06137	7.0542	7.69079	7.55408	7.82403	7.69122	8.24717	7.97167	8.8045	8.09887	8.17023	9.12655	11.9207	11.8881	11.2683	11.8376	11.8146
Os09g0420300	Methyladenine glycosylase family protein.	methyladenine glycosylase, putative, expressed	6.33418	5.76073	6.67621	6.40869	6.37829	7.19705	6.28061	5.87368	5.53781	6.19472	6.00686	6.36622	5.35316	5.37836	5.29466	4.92087	5.11686	5.80642	9.16803	7.88325	8.95969	8.20897	8.85405	9.09221	6.36999	6.83394	6.97264	7.4891	6.81894	7.63892	11.5891	11.2027	11.5417	11.9364	11.2148	11.6128	10.4512	10.2785	11.2762	10.4687	10.0642	11.0123	3.44778	10.0843	9.09708	13.06	9.80065
Os09g0423800	AP2-1 protein (Fragment).	AP2 domain containing protein, expressed	11.1245	11.2422	10.0301	10.5654	10.4501	9.36729	9.83415	9.85458	9.76793	9.47866	9.61507	8.84239	9.17728	9.07718	9.28343	9.17275	9.77227	8.50267	9.75545	10.5066	10.8805	9.19509	10.0925	10.0586	9.12415	8.48796	9.51652	7.90943	8.50493	8.23605	9.45481	8.84678	9.09477	9.01452	8.30496	9.1275	8.8486	9.57512	9.46119	9.77375	9.04702	9.59741	8.62627	8.85207	8.70339	9.78583	8.61396
Os09g0428000	Glycosyl transferase, family 2 domain containing protein.	CSLC2 - cellulose synthase-like family C, expressed	9.24234	8.90061	9.79566	9.63502	9.77532	10.6553	9.23827	8.47379	8.4695	8.77161	9.14402	8.61541	8.56681	8.07288	7.93037	8.39491	8.74999	8.09243	10.9198	10.3601	10.929	10.7753	10.9218	11.1858	8.74847	8.45616	8.64858	10.1066	10.3678	10.2181	11.0375	10.5225	11.2668	11.168	9.81483	10.504	8.6044	8.81661	10.2607	9.23154	9.25233	10.6058	11.199	11.5999	11.7029	12.1911	11.5151
Os09g0438400	Choline/ethanolamine kinase family protein.	choline/ethanolamine kinase, putative, expressed	11.4665	11.3918	10.8948	10.382	10.3183	10.0393	11.2384	10.9024	10.4578	10.5212	10.1474	10.0499	10.5148	10.8913	10.725	10.1027	10.2683	10.5082	10.6007	10.569	10.2138	10.1938	10.073	10.1741	9.93698	9.73208	10.2325	10.8163	10.6043	10.2982	10.309	9.94441	10.3543	10.6532	9.83244	10.0707	9.68557	9.63619	10.0925	10.3711	10.1199	10.3269	10.7796	10.5775	10.3484	10.1852	10.6304
Os09g0458300	Leucine-rich repeat, plant specific containing protein.	No Hit	2.94133	3.42561	-1.21546	2.79	2.93098	2.49236	2.07759	2.80253	3.57477	1.74417	2.75686	0.186064	2.50906	2.95771	2.31253	2.78195	2.21609	1.10246	5.90725	4.34084	5.72903	6.56629	7.15514	7.53237	3.97573	5.16233	1.09266	1.49012	3.15773	-2.90227	7.50889	7.59603	7.86715	7.58648	7.67896	7.50839	5.8758	6.04757	6.8289	6.38074	6.11429	6.01409	6.2203	7.78984	7.63524	5.86576	7.9743
Os09g0459800	Short-chain dehydrogenase/reductase SDR family protein.	zinc-binding alcohol dehydrogenase domain-containing protein 2, putative, expressed	6.62719	6.43303	5.92628	7.22248	6.38634	5.96236	7.5648	7.45124	7.2638	8.082	7.23698	6.51352	8.19071	7.72952	7.4212	7.45077	7.69358	8.23364	4.90676	6.08115	6.06683	5.42151	5.56488	5.57093	5.66115	6.48492	5.37083	7.13771	7.35403	5.11548	6.30468	5.58349	6.02406	6.64362	5.77555	5.77488	5.42266	5.95163	6.7327	6.40084	5.59858	6.54605	7.20757	6.49291	6.10904	6.35228	6.77557
Os09g0480400	Glycosyl transferase, family 8 protein.	glycosyl transferase 8 domain containing protein, putative, expressed	4.55732	3.0663	5.03293	3.29763	3.18229	4.46442	4.02639	3.57483	2.55608	3.036	2.24333	1.65505	2.92382	2.69527	2.80309	2.69015	3.1241	2.98628	9.61698	8.92726	8.76884	10.0816	10.1579	10.1926	4.40037	4.92685	4.51473	2.73511	2.89733	2.63541	8.57543	8.19645	8.38673	9.05739	8.11912	7.7476	5.65714	5.7947	6.60646	6.60456	6.41081	6.99029	11.2819	10.7397	10.8118	6.98709	11.1185
Os09g0516500	3-beta hydroxysteroid dehydrogenase/isomerase family protein.	sterol-4-alpha-carboxylate 3-dehydrogenase, decarboxylating, putative, expressed	8.91294	9.28106	8.9978	9.56597	9.9198	9.41331	9.79957	10.2494	10.1409	10.3829	10.8342	10.0275	9.47535	9.70504	9.45368	9.80645	10.3153	9.81575	10.8262	10.6056	11.2829	11.0026	11.2021	11.1523	9.47377	8.6372	9.24615	10.5511	10.662	10.0399	10.6214	10.6144	10.8979	10.6445	10.3653	10.562	10.0488	10.1758	10.3602	10.2317	10.3449	10.7068	12.1712	12.0219	11.9474	12.1419	12.2567
Os09g0538500	Male sterility MS5.	tetratricopeptide repeat domain containing protein, expressed	2.53138	-1.25498	2.74965	3.08605	2.46926	3.45914	3.38996	2.11788	3.31687	2.02186	2.18948	2.78092	0.718755	0.800335	1.67661	2.3263	-0.0614374	1.23842	10.7112	10.0152	6.83181	11.5735	10.8521	10.4911	-0.729917	5.41642	3.60049	0.416813	3.01886	4.54345	10.0859	9.87111	9.60797	10.1309	9.90105	9.08156	7.04939	7.70014	7.97656	7.90974	8.15795	8.29431	11.7235	10.8056	10.8428	0.696435	11.1441
Os09g0557600	Non-protein coding transcript, unclassifiable transcript.	No Hit	9.23847	9.3791	8.903	9.58472	9.56435	8.96933	9.7094	9.8522	9.87944	10.6162	10.1967	9.6238	10.1872	10.1596	9.94112	9.93544	10.2662	10.8174	9.36206	9.79254	10.0647	9.74333	10.0001	10.1474	9.51426	9.25033	9.47475	10.4417	10.3856	9.62899	10.2467	9.78657	10.2313	10.1246	9.56397	9.82291	9.14943	9.30736	9.8197	9.58981	9.21551	9.78728	10.27	10.6446	10.8771	10.3855	10.6021
Os09g0557700	DOMON domain containing protein.	DOMON domain containing protein, expressed	7.98529	8.38704	7.81334	8.38689	8.52937	7.9908	8.07633	8.89754	8.483	9.01077	9.3669	8.15905	8.98781	9.19268	8.5241	8.95131	9.36359	9.24479	8.16791	8.67524	8.72058	8.49294	8.88957	8.70976	7.92418	7.87757	8.34004	8.93149	9.4813	8.02665	8.91157	8.93885	8.92637	8.92296	8.39214	8.51596	8.34234	8.16555	8.54032	7.82939	8.35224	8.43136	9.13611	9.84069	9.61636	8.94653	9.43382
Os09g0559800	Transporter-like protein.	transporter family protein, putative, expressed	8.50184	8.48285	8.66872	8.82047	8.83588	8.9056	8.88494	8.9203	8.95438	8.55381	8.71109	8.67138	9.21864	8.95064	8.96407	9.02142	9.10874	8.99271	10.244	9.62157	10.3646	9.91649	10.4774	10.5917	9.01982	8.83795	8.47561	9.22276	8.57741	8.27011	10.5168	10.3059	10.8311	10.9716	10.4564	10.7662	9.31685	9.26087	10.2345	9.66303	9.52405	10.2832	10.0447	10.9521	10.9763	11.4723	10.8946
Os10g0130800	NB-ARC domain containing protein.	disease resistance RPP13-like protein 1, putative, expressed	5.04098	6.02663	5.95761	5.67233	6.12482	5.98592	4.40949	5.24099	4.84063	4.33667	4.89111	5.8406	4.58993	5.07195	4.80832	4.76686	5.29635	5.32561	6.72153	5.59648	7.26122	6.2428	7.24645	7.48096	5.22624	4.75076	6.13537	4.09708	5.53739	5.89747	3.73723	4.20828	4.50282	3.66935	4.05172	4.05178	7.91689	6.08144	5.10633	6.1558	5.59406	5.32683	8.0039	8.12549	7.8848	6.8319	7.96342
Os10g0135400	Cyclin-like F-box domain containing protein.	OsFBX359 - F-box domain containing protein, expressed	8.28951	8.54298	8.11519	8.52347	8.68935	8.3017	8.68393	9.09506	9.06058	9.30103	9.56562	8.96682	9.27438	9.18426	9.0273	9.0172	9.39163	9.57921	8.04693	8.67616	8.49823	8.58578	8.5502	8.65356	8.50016	7.86028	8.45704	9.69199	9.65786	8.84497	8.49906	8.54397	8.62462	8.22816	8.11561	8.3837	9.29447	8.99622	8.87319	8.9693	8.8894	9.12518	10.0421	9.42079	9.5402	9.39777	9.83961
Os10g0147200	Pathogenesis-related protein 5 precursor (PR-5).	thaumatin, putative, expressed	4.86445	4.59594	4.91738	3.33607	4.62597	3.21202	6.84953	7.53955	6.61944	6.89804	6.77782	7.16571	3.02777	3.65815	2.80199	5.53683	4.03185	4.35222	9.92655	9.64937	8.47366	10.8642	10.3689	9.62787	5.61803	6.5348	6.87888	7.59834	7.28544	6.46497	9.34307	9.63996	9.359	9.68393	9.73522	9.46721	8.36933	8.57847	10.4609	9.84559	9.46039	9.50817	11.2245	10.1206	10.3609	4.18109	10.4668
Os10g0427700	Conserved hypothetical protein.	No Hit	5.67072	5.659	6.48895	5.46618	5.88085	6.07631	5.68099	6.3224	6.60479	5.14991	5.40478	6.08285	6.76856	6.46931	6.45823	5.85321	6.10754	6.7115	4.99593	5.30875	5.5526	4.89603	5.27278	5.12702	5.41235	4.98938	4.72173	4.43177	4.82222	4.39277	5.40381	5.72156	5.92059	5.44382	5.78257	5.69347	7.71013	6.33335	6.07968	6.28441	5.86555	5.7727	5.89078	5.77196	5.72021	5.61846	5.03686
Os10g0497000	ARM repeat fold domain containing protein.	expressed protein	10.8974	10.7769	10.5761	11.2083	11.0398	10.5481	11.5319	11.3702	11.096	11.8363	11.7123	11.2262	11.2602	11.3142	11.0058	11.1962	11.4429	11.3298	10.5069	10.9461	10.5762	11.0939	10.7841	10.5638	11.3577	10.705	11.3094	12.1834	11.5799	11.1762	11.348	10.9905	11.2145	11.1295	10.5545	10.8534	10.8959	11.2496	11.4873	11.7784	11.4241	11.3947	11.8389	11.318	11.1436	11.8081	11.3162
Os10g0550500	Pectinacetylesterase.	pectinacetylesterase domain containing protein, expressed	2.71915	2.68213	3.6857	5.18404	5.20843	4.96572	5.36488	4.9484	4.31242	5.93448	5.49248	5.70296	2.44728	3.1579	1.65788	3.43443	4.24494	3.79665	7.60714	5.30156	10.2815	5.98905	8.72395	9.67415	4.00835	5.29861	5.05821	3.46322	4.0563	3.99646	5.48046	4.67276	5.78382	6.19774	4.78376	5.34219	4.53181	4.14255	5.16308	4.84247	4.17193	5.87868	4.63059	10.5987	10.117	8.56462	10.6316
Os10g0572900	Protein of unknown function DUF296 domain containing protein.	AT hook motif domain containing protein, expressed	2.85392	3.33435	3.43622	4.07719	4.5721	4.24703	3.45812	3.21571	2.28142	3.50818	4.42142	3.7714	3.33983	3.51991	3.66517	4.76952	4.31688	4.82501	5.45022	5.48674	3.53379	6.7756	6.21653	6.30612	4.41464	4.3678	5.55551	3.86152	4.21527	2.11766	6.42917	6.73891	6.75012	6.54163	6.75354	6.66952	6.10099	6.20917	6.41241	5.87918	6.17208	6.34121	7.72073	6.7938	6.80766	4.18869	7.42594
Os11g0109700	Uncharacterized Cys-rich domain containing protein.	SAG20, putative, expressed	5.38121	5.44653	6.64083	6.15976	6.18673	6.97945	6.50167	5.94139	5.80328	7.32137	7.37112	7.37564	4.156	5.44567	5.12	4.32587	5.49695	6.68019	8.06068	7.01646	8.53921	6.80939	8.23215	8.44321	5.56629	4.01021	4.72503	7.3771	7.74788	6.66929	5.67355	5.81957	5.96883	7.00638	6.75127	6.99365	5.41013	4.78052	4.8515	5.36637	5.01343	4.72286	6.9149	8.06702	7.86475	9.51907	8.80578
Os11g0116500	Chloroplastic outer envelope membrane protein (OEP75) precursor (Outer membrane protein).	outer membrane protein, OMP85 family, putative, expressed	6.4114	6.28714	6.57627	6.79736	6.56342	6.46874	5.76444	5.25294	5.03264	5.05973	5.01386	5.35078	4.89721	4.96752	5.0575	5.1551	5.41862	5.09001	5.6076	5.06369	5.47375	6.03481	6.49727	6.73714	2.18625	3.43929	4.17971	2.92541	3.11247	3.8571	6.54372	6.48359	6.74927	6.54898	6.26333	6.19243	6.45757	6.02742	5.64564	5.57873	5.32073	5.71414	6.88822	6.89515	7.06742	4.77735	6.93963
Os11g0129600	Engulfment and cell motility, ELM domain containing protein.	ELMO/CED-12 family protein, putative, expressed	9.23146	9.61987	9.45165	9.10658	9.42213	9.14195	9.51259	8.89299	8.82719	8.59729	8.83726	9.15431	8.73777	9.3078	8.7778	8.61969	8.72621	7.75702	9.85233	9.40783	9.87741	9.25658	9.68702	10.1302	9.53048	9.29738	9.99846	9.94457	9.56603	9.46326	9.56313	9.36198	10.2524	9.73041	8.64955	9.53867	8.31164	8.83829	9.43772	9.43759	9.05657	9.82639	10.4043	11.1061	11.103	9.9088	10.8385
Os11g0151200	Conserved hypothetical protein.	No Hit	4.68609	4.13563	4.43385	4.98665	4.65876	4.43545	4.74445	4.47576	5.07053	4.0282	4.13187	4.86088	4.71741	4.65502	5.03187	5.3835	5.4728	6.26741	4.8894	4.24246	4.0922	5.83356	5.60311	6.04848	5.25838	5.88864	4.54039	3.43112	3.38171	4.52186	4.89166	5.28551	5.65288	6.10645	6.03182	6.01954	5.96406	5.77557	5.82189	5.18322	5.34376	5.55178	4.87384	4.82026	5.33672	4.02437	4.46237
Os11g0157300	Harpin-induced 1 domain containing protein.	harpin-induced protein 1 domain containing protein, expressed	8.5755	8.78604	8.77545	9.22099	9.2099	9.01173	9.67534	9.6156	9.63694	9.83161	9.79878	9.09888	9.5052	9.42246	9.23217	8.98081	9.23265	9.79908	9.2329	9.59534	9.78622	10.0317	10.1062	10.1956	8.49451	7.84487	8.40786	9.33905	9.76	8.92432	9.93343	9.97024	9.94603	10.0357	9.86662	9.70626	9.32296	9.2339	9.80089	8.88908	8.95935	9.5293	10.4085	10.5605	10.6926	10.8166	10.5592
Os11g0264600	Conserved hypothetical protein.	expressed protein	11.1228	11.0109	10.7342	12.0565	12.0407	11.7662	11.0126	11.4174	11.5094	11.3566	11.5545	11.3457	11.3934	11.8826	11.751	11.5863	11.9515	12.2309	11.3595	11.3709	11.2967	12.2132	12.1444	12.2722	10.9714	10.7779	10.8229	11.5217	11.2999	10.846	12.1266	11.8475	12.2637	12.171	11.6648	11.9196	10.4153	10.7067	11.3758	10.5708	11.0021	11.4158	11.4432	11.9824	12.1041	11.1494	11.8425
Os11g0430000	Serine carboxypeptidase I precursor (EC 3.4.16.5) (Carboxypeptidase C) (CP-MI).	OsSCP50 - Putative Serine Carboxypeptidase homologue, expressed	6.14783	6.02013	6.2288	5.16987	5.06228	5.506	4.82538	4.97828	5.06509	4.29777	4.78861	5.84273	5.24706	5.47449	5.30159	5.04103	4.86156	5.55392	5.14085	4.95681	5.13655	5.49914	6.12536	5.11662	6.13554	6.14638	5.77154	5.26088	4.93732	6.65329	7.13501	7.2801	5.41118	6.92242	8.03137	8.39697	7.19033	6.92979	5.70525	4.50927	6.64754	5.40731	4.89979	4.96335	4.41802	4.51689	4.17089
Os11g0481200	Hypothetical plant protein family protein.	growth regulator related protein, putative, expressed	12.6458	12.268	11.7687	10.847	10.2857	10.1757	12.0394	11.9846	12.1847	10.9597	10.9953	10.6364	12.0569	11.6543	11.8895	11.3391	11.1361	11.2105	11.4325	11.2084	11.5242	11.0963	11.4114	11.6875	10.487	9.93951	10.1758	10.4801	10.6352	10.2977	10.9562	10.4736	11.0195	11.2285	10.0114	10.6785	9.61329	10.003	10.5428	10.2729	9.85101	10.6187	11.8044	12.2506	12.441	12.1533	12.1451
Os11g0488100	Hypothetical protein.	No Hit	12.4956	12.2646	11.5958	10.6493	10.6726	10.2495	11.6174	12.319	12.5835	10.0252	10.2331	10.7517	12.993	13.0174	12.9819	12.5746	11.7024	11.4745	10.9708	11.4885	10.1897	10.5808	9.65746	9.535	12.9186	13.0284	13.2077	12.2192	11.1473	10.073	11.8679	11.6199	12.1699	10.6419	10.3885	11.2401	12.8304	13.0396	13.5519	13.0844	12.8135	13.0999	7.75066	8.6761	8.6893	8.26984	7.48661
Os11g0531800	Hypothetical protein.	expressed protein	4.84974	4.68374	2.93286	5.72629	5.65811	4.09961	4.3719	4.45865	4.69443	5.85239	6.08247	5.79023	4.92882	5.01083	4.73691	5.19092	6.36861	4.82699	4.16509	4.04828	4.56516	3.62016	4.15224	3.98641	4.28217	5.22196	4.74904	4.0326	4.15517	4.82616	4.46431	4.12334	4.83914	4.69096	3.86956	4.20924	5.05836	5.3329	5.15752	5.42629	5.00476	5.88956	7.09103	5.57708	5.8706	3.63421	5.65609
Os11g0554300	(No Hit)	No Hit	3.38881	2.86233	3.06652	3.08212	2.11211	4.12617	2.03609	2.67387	2.7683	3.43153	2.78154	2.70667	3.39067	3.7071	2.01247	4.63938	3.43777	9.02956	3.40008	4.43581	2.45896	4.9651	4.68733	2.56136	5.75497	5.89294	3.49462	4.39119	3.33901	5.19544	5.08036	5.98894	3.95876	4.56047	6.89437	5.31826	5.672	6.46281	3.92024	4.04758	6.04579	3.56817	2.25066	3.60883	3.14697	4.12586	2.04791
Os11g0592300	Glycosyl transferase, family 8 protein.	GAUT2/LGT2, putative, expressed	7.28922	7.76639	7.72161	7.58173	7.92303	7.48898	8.08247	8.00379	7.46	8.25772	8.17665	7.36591	8.43317	8.41496	8.13775	7.45911	8.04805	7.75527	7.21462	7.36283	7.1159	6.84472	7.07829	7.12261	5.82459	4.77539	6.56416	7.08536	7.77494	7.2821	6.51295	7.01604	6.55539	6.68502	6.56556	6.91856	6.6289	6.92168	6.47526	7.48351	7.21958	6.76492	8.35624	7.96723	7.83103	8.59753	8.4589
Os11g0593700	Cyclin-like F-box domain containing protein.	OsFBDUF58 - F-box and DUF domain containing protein, expressed	7.7384	7.34269	7.25716	8.38927	8.05111	7.79602	8.25837	8.09193	7.99148	8.38557	8.18937	7.73303	8.71305	8.69637	8.28596	8.58316	8.58504	8.46992	7.69958	8.21959	7.59958	8.29296	8.06984	8.14892	8.41154	7.62583	8.17566	9.00044	8.84747	7.92733	8.6573	8.1522	8.27302	8.91956	8.00636	8.14424	8.28874	8.04911	8.25438	8.43906	8.30811	8.51377	9.07864	8.92582	8.65551	8.80928	8.70982
Os11g0606100	Hypothetical protein.	disease resistance protein, putative, expressed	7.53521	8.68511	8.0935	8.17834	8.54318	8.2595	6.39129	7.21114	7.13678	6.6459	7.54825	8.05728	7.50416	7.83985	7.5995	6.47994	7.76557	7.84168	6.39891	6.63944	6.76717	6.84062	7.19214	7.03211	5.18916	6.62365	6.10374	6.31909	6.99826	6.64755	6.14001	6.38372	6.64094	6.48363	6.25906	6.66577	9.64096	8.0779	7.22578	8.5458	7.99937	7.19053	8.6745	7.4105	6.96916	7.67116	7.39648
Os11g0685400	Hypothetical protein.	expressed protein	3.58146	4.29774	4.5984	4.229	3.72351	5.09328	3.578	4.00486	3.79678	4.28122	4.62537	5.02246	5.0959	4.97782	4.54693	5.04155	5.08812	5.40976	4.79121	4.9485	3.99722	5.27858	5.82353	4.54037	4.99381	5.17618	3.57361	4.6687	4.81034	5.0957	6.35442	6.51248	5.26577	6.04384	7.2255	7.14672	6.79977	6.72968	5.5984	5.24484	6.28772	5.23467	6.24435	5.65894	5.71288	4.10494	6.20032
Os11g0706600	Thaumatin, pathogenesis-related family protein.	No Hit	1.81863	2.75573	4.00462	2.78712	3.369	4.88465	1.98551	2.88266	2.41376	4.00793	4.54966	4.43087	3.01687	1.70948	3.44813	3.84236	3.12073	3.39422	7.17511	4.98594	7.23982	6.283	7.07764	7.02704	1.72883	1.78706	4.94002	4.29522	3.95742	4.00659	6.02394	6.47193	6.8771	5.62385	6.58462	6.63252	5.58196	5.09126	6.02782	5.43565	6.46834	5.77059	8.61339	8.53339	8.46128	5.75205	8.9457
Os12g0165000	WD40-like domain containing protein.	WD domain, G-beta repeat domain containing protein, expressed	10.1145	10.3281	10.0488	10.5618	10.6189	10.2697	10.8483	10.7669	10.7794	10.9919	10.9459	10.4538	11.0046	11.0152	10.67	10.9104	11.1302	11.1743	10.2605	10.4339	10.4269	10.5297	10.3891	10.4797	10.6492	10.2489	10.629	11.0386	11.0181	10.6846	10.5249	10.2495	10.6895	10.451	9.9825	10.4353	9.98843	10.4029	10.8342	10.4615	10.2353	11.0269	10.764	10.7592	10.7167	11.3331	11.1741
Os12g0197900	Conserved hypothetical protein.	expressed protein	9.85698	10.0169	9.9924	9.97718	9.91461	9.63307	10.5392	10.5714	10.4197	10.665	10.9435	10.3038	10.3837	10.4788	10.2555	10.0012	10.3237	10.3039	9.85942	9.73912	9.8668	9.87176	9.79452	10.1158	10.4306	9.66867	9.94764	10.4272	10.6301	10.6192	9.79408	9.68928	10.1055	9.93328	9.30788	9.9463	9.61575	9.77452	10.1132	10.0337	9.88285	10.2861	10.1516	10.5173	10.4176	10.8319	10.4054
Os12g0263100	Zn-finger, DHHC type domain containing protein.	zinc finger family protein, putative, expressed	3.80302	3.71616	4.74317	4.04463	3.7265	3.52264	4.1708	3.80577	4.10348	3.05961	3.83015	3.67831	2.89896	2.25551	2.57837	2.95023	2.66651	1.86046	10.5082	9.87016	7.06868	11.0231	10.6878	10.4875	4.80153	4.46004	4.48142	2.41601	3.9525	4.21235	10.3425	10.398	10.5758	10.4543	10.0884	9.73164	8.24893	7.77843	9.02953	8.15139	8.44837	9.42347	11.7875	11.2676	11.4845	3.42122	11.1834
Os12g0267900	Zn-finger, RING domain containing protein.	zinc finger, C3HC4 type domain containing protein, expressed	2.06522	2.05402	3.04764	7.42936	7.62802	6.45348	6.64839	6.0265	5.37947	7.9752	8.25902	7.24848	2.91431	2.523	2.73469	5.74093	7.55238	4.29425	8.39155	8.09664	5.48791	9.25671	8.77717	8.79921	6.13883	4.66442	6.33611	7.16156	8.05879	7.10165	8.52833	8.36657	8.26992	8.63426	8.06379	7.51892	6.12123	6.38162	6.96213	7.01166	7.1142	7.44636	9.97411	9.23008	8.96744	7.21151	9.20965
Os12g0289800	Protein prenyltransferase domain containing protein.	tetratricopeptide-like helical, putative, expressed	6.26397	6.4627	7.80553	6.54088	6.52828	6.04898	6.84628	6.64445	5.83408	6.85222	6.7025	6.00293	5.70052	5.68319	5.87526	5.47328	6.54825	6.01511	5.31398	5.38193	6.31224	5.46867	6.30984	6.24173	5.46529	4.98686	5.05056	5.36271	6.15322	5.7699	5.74495	6.15742	5.49681	5.65615	6.23673	7.53116	6.00029	6.23041	5.69104	5.68665	5.9968	5.99135	7.93886	7.3885	6.65439	6.96968	7.90986
Os12g0406100	Glycoside hydrolase, family 43 protein.	expressed protein	12.1408	11.6961	11.6307	12.0312	11.9119	11.4031	12.0818	11.5145	11.6497	11.6625	11.2284	11.1513	12.8829	12.6563	12.4101	11.7927	11.6627	11.5821	11.161	10.847	11.0832	10.3157	10.3391	10.6411	11.1339	10.8257	11.1296	11.7498	11.3385	10.7286	10.4077	9.8099	10.501	10.425	9.36454	10.0656	9.93362	10.27	10.6857	10.7401	10.0581	10.8243	10.5065	11.7155	11.1361	13.0505	11.2986
Os12g0512000	Flavin monoxygenase-like protein floozy.	flavin monooxygenase, putative, expressed	6.57223	7.0537	7.19056	4.00854	4.7776	5.20283	5.66851	5.54471	4.73355	3.31808	3.88612	4.88466	5.21515	5.62056	5.25258	2.80978	3.65971	3.96879	7.67745	7.60452	8.44353	8.09187	7.30209	6.08216	5.54474	5.32924	3.71954	4.45432	4.07882	-0.20441	3.54703	4.89961	4.64738	3.79713	4.1101	4.02144	6.00831	4.77941	3.93052	6.07463	5.09287	4.08233	3.50883	3.13359	3.59503	3.34362	3.18085
Os12g0604800	TPR-like domain containing protein.	tetratricopeptide repeat domain containing protein, expressed	10.1749	10.4498	8.77902	10.125	10.2311	9.17667	9.98515	10.2467	9.63127	10.4057	10.5768	10.2548	10.0085	10.5697	9.9566	10.1745	10.7904	9.72155	10.8538	10.6263	9.13785	11.1622	10.7354	10.629	10.3538	9.72545	10.5458	10.6404	10.4899	10.3003	10.61	10.3211	10.2673	10.8478	10.3886	9.97778	9.25986	9.44975	9.62053	9.94575	9.89657	10.167	11.895	11.4197	10.9542	10.0681	11.2025
[truncated: 129 more columns]
