# Supplementary material for: Comprehensive Network Analysis of Anther-Expressed Genes in Rice by the Combination of 33 Laser Microdissection and 143 Spatiotemporal Microarrays
Source: PLoS One. 2011 Oct 26;6(10):e26162. doi: 10.1371/journal.pone.0026162 (PMC3202526; doi:10.1371/journal.pone.0026162)
Supplement: Table S21 — Microarray data of Lemma preferentially expressed genes. (XLS) [file pone.0026162.s022.xls]

## Sheet: Sheet1
Table S21. Microarray data of Lemma preferentially expressed genes.
RAP-ID	Description_RAP-DB	Description_TIGR	Leaf blade_vegetative_12:00	Leaf blade_vegetative_12:00	Leaf blade_vegetative_12:00	Leaf blade_vegetative_00:00	Leaf blade_vegetative_00:00	Leaf blade_vegetative_00:00	Leaf blade_reproductive_12:00	Leaf blade_reproductive_12:00	Leaf blade_reproductive_12:00	Leaf blade_reproductive_00:00	Leaf blade_reproductive_00:00	Leaf blade_reproductive_00:00	Leaf blade_ripening_12:00	Leaf blade_ripening_12:00	Leaf blade_ripening_12:00	Leaf blade_ripening_00:00	Leaf blade_ripening_00:00	Leaf blade_ripening_00:00	Leaf sheath_vegetative_12:00	Leaf sheath_vegetative_12:00	Leaf sheath_vegetative_12:00	Leaf sheath_vegetative_00:00	Leaf sheath_vegetative_00:00	Leaf sheath_vegetative_00:00	Leaf sheath_reproductive_12:00	Leaf sheath_reproductive_12:00	Leaf sheath_reproductive_12:00	Leaf sheath_reproductive_00:00	Leaf sheath_reproductive_00:00	Leaf sheath_reproductive_00:00	Root_vegetative_12:00	Root_vegetative_12:00	Root_vegetative_12:00	Root_vegetative_00:00	Root_vegetative_00:00	Root_vegetative_00:00	Root_reproductive_12:00	Root_reproductive_12:00	Root_reproductive_12:00	Root_reproductive_00:00	Root_reproductive_00:00	Root_reproductive_00:00	Stem_reproductive_12:00	Stem_reproductive_12:00	Stem_reproductive_12:00	Stem_reproductive_00:00	Stem_reproductive_00:00
Os01g0100100	RabGAP/TBC domain containing protein.	TBC domain containing protein, expressed	10.7265	10.0138	9.85404	10.7482	10.095	9.56068	10.767	10.195	10.1746	10.0685	9.55632	9.36475	10.2763	9.78588	9.91229	10.1011	10.0566	9.79787	8.49756	8.69378	9.14358	8.67116	8.96345	9.39445	8.99398	8.19717	8.47747	8.07073	8.44636	8.46751	9.22203	8.39384	8.91381	9.56117	8.22004	9.0502	8.31718	8.30901	8.97263	8.56272	8.35378	9.2866	9.36221	9.34519	9.32988	9.47391	9.20789
Os01g0113000	Peptidase C48, SUMO/Sentrin/Ubl1 family protein.	conserved hypothetical protein	7.0305	7.36516	6.15411	7.76248	7.42645	7.38981	7.49581	6.37865	6.59005	7.35772	6.986	5.61475	5.51824	5.64622	5.81245	5.36953	7.15628	5.31348	5.89616	5.61741	6.50576	5.80563	6.46549	7.43852	5.10983	4.97085	5.54391	4.28489	4.5694	4.04261	6.70651	6.22611	6.77034	6.91502	4.81356	6.29372	5.97574	4.93277	6.06225	6.15116	5.14379	5.56652	8.50877	7.7513	7.93775	7.34423	8.68873
Os01g0118600	Protein of unknown function DUF563 family protein.	glycosyltransferase, putative, expressed	3.43974	2.25724	4.90659	3.33063	3.75349	4.29493	4.00283	3.84224	2.66138	3.33843	3.4937	4.29458	3.82421	3.28465	4.44326	3.54218	3.60456	4.25332	7.67618	7.07188	7.07116	7.62579	7.48595	7.70565	5.37036	7.8939	5.78021	6.73342	6.68314	6.78063	8.22304	8.43586	8.97575	7.92271	8.00797	8.04089	6.68596	7.01829	8.09957	7.13572	6.96743	7.97935	6.44818	8.48698	8.62662	7.99974	8.33044
Os01g0135000	Hypothetical protein.	No Hit	1.49834	4.21599	1.17352	2.50405	2.58598	2.43052	0.658459	1.0343	3.13908	2.071	1.61171	4.57769	4.0387	0.40735	0.815361	0.334607	1.3567	1.13085	0.0908704	0.602619	1.58468	0.361377	0.660677	0.0657599	1.51048	3.71995	3.34762	0.115862	3.33675	-1.33137	3.84605	3.37591	3.75872	3.76927	1.88157	3.35929	4.05055	1.75205	3.36934	4.10544	2.95098	3.50433	1.1838	2.17068	2.34692	2.16765	2.50874
Os01g0135700	Flagellar calcium-binding protein (calflagin) family protein.	OsCML16 - Calmodulin-related calcium sensor protein, expressed	11.0065	11.0162	11.8264	10.3153	10.3822	11.0634	9.52144	9.49282	9.54885	10.2325	10.262	10.5868	10.1405	9.79649	9.41455	9.79481	9.75186	9.53392	9.32876	11.106	10.2103	9.03101	8.36717	8.7393	9.71599	9.20167	9.39118	10.3157	10.407	11.4877	7.34815	7.96042	9.04478	7.15333	7.36795	7.82421	8.2598	8.10786	8.96959	8.07076	7.93061	8.57161	8.34132	7.59115	7.53701	9.29141	8.0561
Os01g0136300	Conserved hypothetical protein.	expressed protein	8.57018	9.00534	8.83789	8.26752	8.51575	8.81776	9.34717	9.61912	9.07829	9.98173	10.867	11.0922	8.21573	9.33195	8.86983	9.48965	9.32264	8.35536	9.68207	8.97995	9.93693	9.48941	10.2392	10.4048	8.64118	8.56172	9.54777	10.5505	11.2526	10.9792	8.38769	9.15159	10.0856	8.84863	8.3723	8.22312	6.8546	7.11001	8.18146	7.78986	7.78535	8.49884	8.80922	10.3691	10.1613	9.53908	10.1322
Os01g0140400	Leucine-rich repeat, plant specific containing protein.	leucine-rich repeat protein-related, putative, expressed	4.60001	4.86027	5.72058	4.81792	4.79227	5.86896	4.79245	4.50365	4.2808	4.49966	4.4756	3.99461	4.12481	4.51842	3.64422	4.70268	4.38658	4.11371	6.85927	6.11943	7.24905	7.40828	8.18634	8.05207	5.25341	5.74408	3.87683	4.27445	4.19406	5.13769	7.43235	7.51334	6.9859	7.28129	7.50817	6.7522	6.28681	6.66462	7.80554	5.47679	6.48239	6.41238	8.15043	8.52236	8.38902	7.61288	8.45646
Os01g0144000	Conserved hypothetical protein.	expressed protein	10.4687	10.1593	10.1702	10.2557	9.72066	10.1336	10.1166	10.0897	10.3501	10.3626	10.13	9.98503	10.1524	10.1188	10.448	10.0124	9.83378	10.1145	11.3553	10.5761	11.4528	11.6372	11.7194	12.2833	9.92389	9.70021	9.94585	10.4802	10.3866	10.2387	11.0366	10.6052	11.0405	11.4465	10.7034	11.0447	9.73092	9.82791	10.5583	10.0843	9.84267	10.509	11.9376	12.1672	12.5288	11.7599	12.4313
Os01g0150400	Protein tyrosine phosphatase-like protein, PTPLA family protein.	expressed protein	3.30443	2.99944	1.64445	2.94923	3.05999	2.64944	3.04814	1.12314	2.50717	2.2509	1.91276	0.388626	2.53239	1.95483	0.808007	2.80644	3.07737	1.36129	3.54787	2.37606	3.06185	2.22845	3.31301	2.96631	2.85939	2.46103	3.79518	3.8742	2.62571	6.13007	3.38594	4.04965	3.44975	4.50742	5.1055	3.3276	2.48116	4.90244	1.75138	2.47057	4.21214	1.90335	5.04797	4.93485	4.38222	3.60308	5.41398
Os01g0150800	Protein tyrosine phosphatase-like protein, PTPLA family protein.	expressed protein	3.83851	3.86664	4.03013	3.63197	3.44868	3.0538	3.76014	3.76452	3.79679	3.61381	3.46031	2.88456	2.94245	3.03665	2.76292	3.27991	3.41532	4.93308	4.48392	4.05847	5.11915	3.96712	4.08851	3.62174	4.15464	4.763	4.65065	3.77447	3.31925	3.92819	4.47197	4.80781	3.64299	4.15947	5.50819	3.51767	4.64382	5.18851	3.56019	3.83396	4.8276	4.12614	4.37295	4.2664	3.69569	4.99304	4.72464
Os01g0167500	Conserved hypothetical protein.	transporter-related, putative, expressed	11.0209	10.9871	11.2391	10.6256	10.7809	10.9718	11.4637	11.9933	12.1466	10.9929	11.472	11.199	10.9055	10.8751	10.6782	10.6451	10.9876	10.5255	11.9458	11.8414	12.1255	12.0786	12.1821	12.3418	12.7074	12.3327	12.0363	12.5824	12.204	12.4327	12.0854	12.014	12.6939	12.5379	12.1898	12.6246	11.0108	11.5173	12.4345	11.5768	11.561	12.3643	11.8534	12.4477	12.8643	11.1001	12.4069
Os01g0167900	Conserved hypothetical protein.	KIP1, putative, expressed	3.28394	3.06576	5.34154	3.85659	3.79828	5.86692	4.84515	4.33654	4.76252	4.32671	4.22385	5.02042	3.65839	3.29496	4.46452	3.85782	3.70457	3.84842	9.24325	8.02951	9.91275	8.62373	9.4123	10.0094	6.07496	6.08389	5.66814	5.90496	5.69942	5.21807	9.33345	9.52715	9.601	9.67825	9.37237	9.07707	7.6943	7.83318	8.53139	8.08568	8.01406	8.71048	9.7155	8.72138	9.3982	6.50606	9.90957
Os01g0186900	Hypothetical protein.	transposon protein, putative, CACTA, En/Spm sub-class, expressed	7.74384	10.0709	11.3328	7.35897	6.48528	6.83308	8.35004	8.65351	9.23703	6.62287	7.78526	8.041	9.38768	9.01574	9.37476	8.26096	8.24217	8.22321	8.67097	11.531	10.2267	6.89352	5.97465	8.78166	9.45344	10.5772	11.1994	10.5014	9.32561	8.26004	9.04416	9.55019	11.402	8.92885	9.74891	10.2543	9.93003	9.89801	11.1903	9.44153	9.30068	9.98458	8.93076	6.50742	5.1627	7.26538	3.86563
Os01g0190500	IQ calmodulin-binding region domain containing protein.	IQ calmodulin-binding motif family protein, expressed	3.03153	2.09852	3.84585	1.90731	2.31734	2.68685	3.41289	2.86089	3.08507	2.70701	2.05374	3.5209	3.34645	3.31791	2.0382	2.99725	2.34488	0.124005	8.15959	7.13818	3.74253	7.76404	7.51247	7.31201	4.38483	5.28481	3.8756	3.78182	2.87635	4.43357	7.47536	7.59546	7.60706	7.38361	7.41409	6.75492	5.18707	5.55625	6.04113	5.62563	5.88809	6.47792	8.01241	7.5795	8.04559	2.16611	7.15851
Os01g0195200	Serine/threonine-protein kinase PBS1 (EC 2.7.1.37) (AvrPphB susceptible protein 1).	retrotransposon protein, putative, unclassified, expressed	4.06001	3.70052	4.27932	3.61659	4.36187	4.8677	3.27262	3.67611	3.44649	4.33256	4.07715	3.69765	4.04563	2.14904	1.4758	3.59783	2.66275	1.49093	7.72372	7.58305	7.83867	9.48596	9.84009	9.61762	4.59723	4.29756	5.14452	4.46348	4.52216	5.13878	8.14751	8.20509	8.29725	8.81198	8.37168	7.80439	6.74066	6.11825	6.68772	6.59301	6.86612	7.02597	9.49677	10.0447	9.94987	8.79551	10.2972
Os01g0212000	Conserved hypothetical protein.	No Hit	2.44591	1.92208	2.31916	1.38033	0.466179	2.61963	1.91419	0.692461	-0.617819	0.884242	0.915443	-0.614313	2.86552	2.11945	4.99058	3.09214	1.4471	0.567119	8.12459	7.35856	7.65894	8.95663	9.2612	8.6355	4.80133	5.88027	5.01325	3.86091	2.81166	5.58134	7.9205	7.49515	7.97931	7.9873	7.46576	7.00503	4.3427	5.50006	6.53158	5.4763	5.8207	7.03681	8.62019	8.52689	8.5827	5.46382	9.19528
Os01g0223600	Protein kinase domain containing protein.	inactive receptor kinase At2g26730 precursor, putative, expressed	11.619	11.2455	11.6074	9.65366	9.4923	10.3056	10.8821	10.8328	11.0723	9.84448	9.65906	9.56721	11.4528	11.2075	11.3457	10.2462	9.88562	11.3398	12.2606	11.7645	12.1889	12.4991	12.6432	12.9894	10.2723	9.88055	9.75944	10.4725	10.7382	10.5082	12.4869	12.2041	13.0039	12.5238	12.2327	12.3938	10.9675	10.7332	12.0816	11.2113	10.8543	11.8555	12.4392	12.456	12.9525	10.1309	12.4415
Os01g0228800	Conserved hypothetical protein.	expressed protein	9.23123	9.11759	8.65569	9.67718	9.57115	9.10625	10.4286	10.2597	9.79895	10.8878	10.7571	10.2208	9.67182	9.83456	9.40013	9.80406	10.3373	9.19295	9.05914	8.67245	8.64588	8.73661	9.06512	9.05717	8.89485	7.86751	8.32715	9.02778	9.68215	9.03347	9.0953	8.89903	9.06271	9.64276	9.02232	9.52451	8.01035	8.29835	8.66718	9.22142	8.76724	8.99101	10.017	9.5311	9.13687	10.218	10.1256
Os01g0232100	Tonoplast membrane integral protein ZmTIP4-3.	aquaporin protein, putative, expressed	5.87098	4.80307	7.26973	5.228	5.11171	7.00514	7.93818	7.25149	6.58348	9.34461	8.13773	10.0908	8.63566	8.14886	9.11445	10.9195	10.1135	10.3157	9.70282	10.5086	9.93325	9.68894	9.56737	9.59891	13.0934	13.2176	14.4969	14.7451	12.2405	13.8216	6.65011	5.79986	6.88828	7.04975	6.01159	6.30723	10.244	9.93485	10.496	10.8412	10.4999	11.0692	11.1142	10.2805	10.4033	11.795	11.4813
Os01g0258000	Conserved hypothetical protein.	expressed protein	6.33618	5.98992	5.27432	7.0598	6.45377	5.96983	6.4612	5.93931	6.46346	7.08303	6.64392	6.50158	6.78411	6.11228	5.7901	6.22255	6.48989	6.32778	6.31836	7.11003	6.49399	7.54713	7.09583	7.21505	6.65821	6.5818	6.14187	7.13063	7.19724	6.72987	7.2726	6.69222	6.58728	7.50158	6.62622	6.79275	6.30495	6.49713	6.62232	6.60738	6.57403	6.75681	7.56905	7.09509	6.72574	7.58159	7.00803
Os01g0260700	PUR-alpha/beta/gamma, DNA/RNA-binding family protein.	PUR ALPHA-1, putative, expressed	12.6234	12.6538	11.6207	12.473	12.4269	11.4478	12.9758	13.1676	12.7612	12.8107	12.8381	12.6141	12.9867	13.3191	13.0129	13.0658	12.9568	13.0679	13.4783	13.3881	12.408	13.4716	13.1815	12.9332	12.431	12.3362	12.7099	13.3395	13.0034	12.5173	12.8502	12.5784	12.4555	12.6904	12.404	12.3017	12.3546	12.3517	12.4633	12.3611	12.8412	12.6306	13.9787	13.7368	13.555	12.5956	13.383
Os01g0278000	VQ domain containing protein.	VQ domain containing protein, putative, expressed	10.9068	11.4801	11.6046	11.6251	12.1061	12.0302	9.20631	9.49527	9.25311	9.50663	10.1609	9.76676	9.78408	9.94302	9.78835	9.0456	9.63411	10.0898	9.19286	11.601	10.033	10.0979	9.49466	9.55251	9.1064	9.04937	9.30712	10.0952	10.6916	10.1208	9.25447	9.87171	10.1685	9.03741	9.71754	9.16494	8.71852	9.21227	9.52097	8.96959	8.12314	8.89792	10.2485	8.98533	9.14137	10.9684	9.36714
Os01g0283000	Conserved hypothetical protein.	sugar transporter superfamily, putative, expressed	4.22211	4.44902	3.75396	5.20802	5.00707	3.90632	5.02212	5.10732	5.29145	6.07443	6.02738	5.09906	5.91493	5.84198	5.97049	5.68957	5.88739	5.46177	6.86205	6.61724	6.32428	7.92478	7.92371	7.67347	5.79255	5.67063	6.27408	6.28969	6.47435	6.64167	7.55548	7.08979	7.17743	7.77352	6.97612	6.87577	5.65404	6.1238	6.46916	6.43663	6.44272	6.61533	8.35966	8.26768	7.98126	7.83151	8.68395
Os01g0300200	ATP:citrate lyase.	ATP-citrate synthase subunit 1, putative, expressed	12.2009	11.9761	12.1033	12.6287	12.4959	12.5977	11.875	11.7812	11.7066	11.9916	11.9906	11.3146	11.888	11.7981	11.5968	12.0784	12.2558	12.0129	13.147	12.5751	13.4923	13.1233	13.61	13.709	12.0451	11.691	12.4388	12.622	12.3572	11.8362	14.0187	13.4141	13.8598	14.0214	12.9388	13.0519	12.1243	12.3287	13.0997	12.7903	12.5149	13.2419	13.5807	14.6481	14.6318	13.6833	14.4847
Os01g0311400	Zn-finger, RING domain containing protein.	RING-H2 finger protein, putative, expressed	10.614	10.3242	10.4613	11.4792	11.2064	10.9919	11.7299	11.4458	11.512	11.3396	11.1051	11.2005	11.6631	12.2655	11.8202	11.2484	11.2444	11.878	10.674	11.1066	10.304	10.8592	10.2962	10.1761	12.1143	11.522	11.6324	12.59	11.6845	11.538	8.92543	8.67118	9.10878	8.93252	8.28416	8.24561	8.31062	8.34676	9.40222	8.72717	8.34312	8.78627	10.7962	9.87189	9.87346	9.98892	9.82407
Os01g0312500	Pectin methylesterase isoform alpha (EC 3.1.1.11) (Fragment).	pectinesterase, putative, expressed	6.23651	4.79474	10.6877	3.15685	3.31476	9.82013	4.26866	3.22895	3.03523	2.33174	1.88572	3.83183	3.44187	3.94727	3.4281	3.22813	2.3539	1.32224	11.8376	10.3879	12.3415	12.1594	13.1057	13.3148	4.09794	4.0835	4.54961	3.33987	2.60038	4.49729	10.5629	9.96647	10.1277	9.8563	9.0013	8.25427	5.89093	5.78134	7.26005	6.69103	6.87995	8.67387	11.0838	13.2804	12.8592	10.3857	13.2134
Os01g0315600	Conserved hypothetical protein.	esterase/lipase/thioesterase family protein, putative, expressed	3.4655	3.26126	4.48496	2.24045	3.43052	4.95967	4.09362	2.26352	1.94555	1.77243	2.10183	3.16019	3.10107	2.12612	2.22339	1.89546	4.63021	4.81475	6.57161	6.57298	8.10153	7.04249	8.14831	8.23867	-1.53369	6.22317	3.40999	1.66256	1.89678	1.49918	4.87103	3.56762	5.51495	5.70842	1.02325	5.57046	6.222	2.01331	4.43702	4.24814	2.47249	4.49497	6.91378	8.30356	8.1119	6.46526	7.96366
Os01g0315700	Hypothetical protein.	expressed protein	3.63507	3.9627	1.56983	3.34108	3.17202	3.18581	2.06549	2.72345	3.39356	2.78576	2.57455	2.57709	4.56421	4.08212	3.91551	3.75649	3.71745	3.72558	10.5555	9.15792	11.113	10.1913	10.9093	11.108	5.88818	5.7099	6.6002	4.80306	4.44928	2.12151	8.7486	8.15907	9.07038	8.25984	8.06508	8.03956	6.75128	6.42338	7.56859	6.85321	6.30957	7.51302	8.76302	10.4695	10.4426	9.71491	10.2284
Os01g0315800	NAD-dependent epimerase/dehydratase family protein.	NAD dependent epimerase/dehydratase family domain containing protein, expressed	11.7376	11.8058	11.3252	12.1679	12.2286	11.6786	12.0751	11.9766	11.8152	12.6273	12.3626	11.7961	12.7262	12.6505	12.4219	12.9016	13.0838	13.1848	11.934	12.5433	12.4442	12.4106	11.9578	12.3187	12.3073	12.1429	12.3292	13.3652	12.8997	12.3897	12.0383	11.8907	11.9721	12.1448	11.6729	12.2248	12.2058	12.4266	12.4836	13.2212	12.6661	12.6024	10.8009	12.2012	11.8816	14.0827	12.3846
Os01g0325400	Hypothetical protein.	No Hit	9.05485	9.32252	9.00872	8.0494	8.55817	8.33789	9.89659	10.5073	10.0896	10.1121	10.2225	9.01488	7.72911	7.6491	7.15242	7.95306	8.46141	8.32488	8.01003	10.2082	10.2253	8.27236	8.35264	8.49987	9.08495	8.94167	9.22419	9.49411	11.4493	8.3752	8.38955	8.79307	8.77744	8.34683	7.97103	7.99576	10.7609	9.33558	8.88798	9.0459	9.15755	8.71456	8.41946	8.57925	7.69477	10.5674	7.79848
Os01g0329300	Glycoside hydrolase, family 28 protein.	retrotransposon protein, putative, unclassified, expressed	-0.429914	1.0034	4.26152	1.41241	-0.299635	2.48664	0.904904	2.5376	3.54119	0.890058	1.85927	0.357232	2.43453	1.89204	0.694979	1.94132	1.34044	2.74544	2.53592	0.258014	0.795413	-0.349733	0.329429	1.18987	-0.251965	5.93506	2.98018	1.49443	1.68632	0.922643	6.92264	7.23228	7.32744	4.14789	4.16703	3.9816	4.03578	3.66592	4.61692	1.52725	1.12759	8.15812	3.68129	2.15525	2.29682	1.69492	2.40604
Os01g0347100	Protein of unknown function DUF1399 family protein.	DUF1399 containing protein, putative, expressed	7.89073	8.16053	8.12718	9.40525	9.54502	9.58027	7.53128	7.48909	7.62906	10.4372	10.3837	10.5058	8.71271	9.01847	9.04265	10.1333	10.1885	10.286	8.45386	8.89333	8.38845	9.25619	9.27783	9.68933	8.44009	8.16096	8.7276	10.5967	10.222	10.0207	9.97365	9.75147	10.3503	10.3477	9.64068	10.3895	9.6445	9.4348	10.219	9.76419	10.0125	10.4599	8.61407	8.89033	8.66396	10.4496	9.87374
Os01g0378100	Peroxidase precursor (EC 1.11.1.7).	peroxidase precursor, putative, expressed	7.19082	4.94957	10.4316	4.68291	4.82624	9.15873	5.17814	2.75531	2.94621	2.4688	1.6568	3.02315	2.19948	2.68264	0.536594	1.71054	1.73884	1.04142	9.3334	6.0643	9.70824	6.91486	9.22935	9.7193	1.89075	4.4833	4.15144	1.67891	2.35889	1.58827	6.188	6.68089	7.20006	6.5839	6.37393	6.712	2.93533	0.962237	4.89103	3.21696	3.97173	4.37338	2.43469	7.61436	9.44067	9.59433	8.91211
Os01g0382400	Pathogenesis-related protein PRB1-2 precursor.	SCP-like extracellular protein, expressed	8.47119	7.72815	9.47793	7.42958	6.91206	8.77227	10.6219	9.2405	9.5309	9.09067	9.33003	10.994	4.08337	2.59846	2.3383	3.63905	4.34524	3.77112	10.6423	10.8592	7.94618	10.2245	7.02676	8.49754	11.6514	10.5172	13.0968	10.6164	11.7996	11.9705	4.03662	4.7735	3.33051	3.28366	5.3651	3.69227	4.6718	5.30658	3.86496	3.54782	4.88158	3.21544	3.66921	3.13619	4.29843	8.01896	3.35082
Os01g0384800	Hypothetical protein.	PRAS-rich protein, putative, expressed	7.92582	8.70979	9.27536	9.33726	9.19885	9.03926	9.33318	9.74566	9.63549	11.2374	11.3021	11.5407	9.24829	9.65824	9.49277	10.5364	10.6338	11.3195	8.76805	10.3567	9.70674	8.56672	7.92876	8.0572	10.0266	9.67963	10.1816	10.9262	10.8575	9.34842	9.45856	9.67899	10.5014	9.29866	9.28672	9.81703	9.7749	10.0176	11.2795	10.6632	9.92579	10.592	10.2323	6.81535	6.45761	9.28174	7.06355
Os01g0512200	Adaptin, N-terminal domain containing protein.	AP-3 complex subunit delta, putative, expressed	9.00837	9.23793	8.85716	9.76467	9.91939	9.32429	9.50324	9.9959	9.92184	10.6168	10.9716	10.1001	10.1718	10.2339	9.61842	10.1406	10.7009	10.4487	9.3942	9.73225	9.59237	10.1772	10.1856	10.4542	10.0604	9.60946	9.9662	10.9119	11.1089	10.2075	10.4568	10.1559	10.5725	10.2441	9.84494	10.0227	9.75683	9.92219	10.2233	10.2162	9.99433	10.3905	10.5963	10.8415	10.956	10.3572	10.809
Os01g0530100	Conserved hypothetical protein.	expressed protein	7.29363	7.14342	6.53502	5.53197	6.00454	4.45896	6.23932	6.50572	6.8171	5.01281	4.98352	5.10821	7.64011	8.34456	8.14255	6.4282	6.30876	6.80707	8.16097	7.06208	7.85698	7.10634	7.40084	7.39119	5.80748	6.19835	4.0034	4.04171	4.80958	4.61523	6.18282	6.23545	6.19829	5.99527	6.0602	5.35655	5.14787	4.87291	5.35445	4.56666	5.21985	5.11694	7.17833	8.48722	8.29544	6.7762	7.21159
Os01g0531400	Protein of unknown function DUF642 family protein.	expressed protein	8.61611	8.66826	8.8163	8.63841	9.01945	9.61679	7.60166	6.66146	6.55854	8.1304	9.10715	8.59413	7.33092	7.39361	7.3019	8.34128	8.13065	8.19543	14.4194	13.588	13.6336	14.5151	14.5807	14.6301	7.69023	7.44499	8.00456	9.45553	10.298	10.0634	12.6942	12.571	12.711	13.0089	12.3675	12.4485	10.6375	10.4712	11.3673	11.4939	11.4619	11.8524	15.2279	14.8222	15.0054	12.5689	15.2862
Os01g0543100	Peroxidase 72 precursor (EC 1.11.1.7) (Atperox P72) (PRXR8) (ATP6a).	peroxidase precursor, putative, expressed	5.43269	4.58632	6.32606	5.37459	5.02291	5.94526	7.02135	6.23227	6.93916	6.75575	6.5977	6.84248	6.41031	6.28369	5.92995	6.95818	6.63394	6.95145	11.2418	10.8059	9.6197	11.9887	11.777	11.1157	5.94958	5.42579	6.44558	8.05836	7.29317	6.9843	12.3892	12.4406	12.2712	12.5228	12.5653	12.4323	11.547	11.2769	11.5024	11.121	10.86	11.3428	12.9638	12.6938	12.5564	11.3853	12.6825
Os01g0545100	Hypothetical protein.	MYB family transcription factor, putative, expressed	2.83253	2.47652	2.33888	2.90684	2.21074	1.08708	2.68917	1.529	2.93289	3.18819	2.30768	2.50434	3.30044	2.3732	3.03698	3.76934	1.10033	2.4593	7.62618	3.95486	7.7731	5.62784	7.0946	7.89002	4.10285	6.07992	5.07004	3.83502	2.89078	4.23189	5.51662	4.09792	5.25416	4.94197	2.82225	3.61256	1.08242	1.74686	4.25343	3.89191	2.01049	4.65319	5.66855	9.28986	9.62805	8.12901	9.4938
Os01g0566800	Basic helix-loop-helix dimerisation region bHLH domain containing protein.	No Hit	3.59966	2.70306	8.35527	5.59543	4.74759	8.70939	8.78897	7.84675	7.34434	7.37196	7.41944	8.20314	2.66755	0.25467	2.74117	3.42608	2.69788	2.91689	9.37117	5.17862	8.90058	6.69361	8.56042	7.25523	6.91559	7.68421	7.09625	5.09473	6.68848	8.23553	4.78637	5.357	5.03459	5.11614	5.7188	4.93067	5.41766	4.3603	4.7476	4.43006	4.45123	5.22473	8.41607	7.18061	6.08607	9.62666	7.45336
Os01g0570800	IQ calmodulin-binding region domain containing protein.	calmodulin-binding protein, putative, expressed	11.5241	11.5122	11.6383	11.7642	11.7119	11.9274	11.4718	11.7351	11.6981	12.6111	12.7442	12.371	11.2431	11.355	11.2623	11.5461	11.693	11.3812	10.5922	11.565	10.9376	10.1004	10.4275	10.4456	10.4125	9.91756	9.94087	10.7849	11.2883	9.97036	12.0958	11.7902	12.4523	11.6764	11.4864	12.3376	11.6524	11.8999	12.3334	12.3952	12.2561	11.661	6.84392	6.96453	6.55851	8.79918	7.19206
Os01g0597600	Amino acid/polyamine transporter II family protein.	transmembrane amino acid transporter protein, putative, expressed	3.47214	3.54276	8.8641	3.92867	3.29704	4.70837	5.93489	4.27351	5.39957	4.60822	5.74283	4.14223	4.53691	3.72299	3.28181	3.97753	3.68776	4.14988	6.40994	7.32241	8.98376	5.3571	4.86511	5.90572	4.56057	4.47625	4.74423	4.46076	4.86681	5.23259	4.61342	5.18868	6.67146	4.93784	5.96581	4.55734	5.14519	5.24107	5.83611	4.6759	4.8444	4.56065	1.57591	2.53438	2.23298	2.63764	1.62617
Os01g0631700	Ser Thr specific protein kinase-like protein.	serine/threonine-protein kinase, putative, expressed	3.35339	2.90949	4.37047	3.38508	3.09663	4.29877	2.98783	2.846	2.51834	2.41943	3.42081	2.54026	2.9861	1.0443	1.45072	1.09376	2.31873	1.4791	8.07017	7.36581	8.97312	8.28774	8.88695	9.44319	4.72912	4.84451	3.08461	3.23072	3.3786	5.17873	6.58846	6.28541	7.35571	6.71282	6.1533	6.06438	5.30456	4.72536	5.84066	5.16533	5.3911	5.722	8.57479	9.16495	9.6326	3.67274	8.55807
Os01g0634300	Heat shock protein DnaJ, N-terminal domain containing protein.	dnaJ domain containing protein, expressed	4.57112	5.15315	4.57968	5.85437	5.94306	5.1819	4.56106	5.16944	4.28947	5.42704	6.12658	4.81598	4.55983	4.6823	6.74727	4.29858	5.53473	5.04909	4.94846	5.32612	5.4797	6.67412	6.89253	7.04809	4.43497	4.05533	4.30806	4.68075	5.64533	5.54534	6.74145	6.60593	7.03065	7.41948	6.74243	7.5716	7.13552	6.62885	6.90351	7.64811	7.48852	7.28415	6.3108	6.4389	6.13339	8.21089	7.79269
Os01g0647700	Epoxide hydrolase family protein.	hydrolase, alpha/beta fold family domain containing protein, expressed	7.93545	7.81911	7.57881	8.52262	8.63981	8.22306	8.603	8.71569	8.58422	9.2772	9.18464	9.03988	8.57039	8.83942	8.84432	9.11954	9.42825	9.94399	9.54466	9.83208	9.42993	10.3457	10.215	10.1104	9.33269	9.15236	9.63631	10.8263	10.5551	9.94644	9.82611	9.5002	9.96365	9.98789	9.49992	9.71883	9.4672	9.52238	9.77072	9.38103	9.72921	9.98709	11.2691	10.5153	10.639	9.86132	10.7975
Os01g0650700	Conserved hypothetical protein.	expressed protein	8.99215	8.96614	8.13197	9.81246	9.38221	8.76613	9.75943	9.06523	8.61692	9.79211	9.40529	8.5533	7.86611	7.93522	8.05003	7.98866	9.07521	7.49815	7.00958	7.44741	8.08201	7.28898	8.05919	8.35135	9.02393	7.15125	8.79701	7.96718	8.35266	8.83639	8.45851	7.6432	8.12424	8.64746	7.00264	8.13281	8.66384	8.90266	9.03761	9.56413	9.07534	9.30033	9.54934	9.23376	9.01221	9.45437	9.26639
Os01g0652000	Conserved hypothetical protein.	No Hit	2.61966	3.87198	2.79764	4.17367	5.22105	2.81265	2.2469	3.59462	1.76605	3.728	2.95103	3.49528	3.66751	3.49788	3.52002	2.06464	4.01001	5.09054	11.8722	10.44	12.436	12.8046	13.5368	13.0636	4.03375	5.25607	4.6842	3.38786	5.27405	5.96632	9.38148	9.48064	9.56558	9.40648	9.24953	8.75376	7.37057	7.28146	8.39164	7.6909	7.96061	8.57802	11.0221	12.2121	12.4157	9.47654	12.7386
Os01g0652800	Hypothetical protein.	expressed protein	8.51354	7.78846	10.2473	7.4708	8.03402	10.0058	6.33844	5.31585	4.87748	4.59205	4.23156	5.48906	3.16855	2.79438	6.44595	3.87417	3.64142	4.48833	13.5412	12.5636	12.6294	13.2305	13.1776	13.3018	6.6799	6.99635	7.22295	6.81704	6.57452	7.53124	12.809	12.9276	12.981	12.5381	12.5533	12.3723	11.3602	11.3713	11.7978	11.7603	11.5482	11.6514	14.0959	14.1096	14.3571	12.2082	13.9859
Os01g0686000	Conserved hypothetical protein.	expressed protein	10.2042	10.5327	10.4033	8.81687	9.13818	10.1157	10.1203	10.7692	10.5501	7.83037	8.11904	8.9875	8.68383	9.46345	9.40849	7.00346	7.35935	7.27187	10.0977	11.0237	9.75296	9.34162	8.93128	9.21608	9.50966	9.36321	8.76959	9.43542	9.32378	9.02279	8.43738	8.71116	8.93686	8.56619	8.41924	8.62649	7.15675	7.73672	8.66065	7.67401	8.22405	8.54141	9.11447	10.1975	10.3387	10.7959	10.1254
Os01g0687900	Non-protein coding transcript, unclassifiable transcript.	No Hit	2.64892	3.00921	3.65609	3.20989	2.83392	2.00047	3.48681	3.22425	3.18776	3.46853	3.69746	3.15643	3.54254	3.66007	2.63561	3.73076	3.56952	2.61972	2.90232	3.44308	1.52396	3.11904	3.17491	2.35131	2.67538	3.98115	3.92091	3.17121	2.90792	3.8973	3.28587	4.13276	2.48889	3.105	4.71224	3.09495	5.21268	4.98716	2.42267	3.58653	4.33326	3.3209	2.97556	3.4044	3.54212	3.65662	3.25054
Os01g0692700	Hypothetical protein.	zinc finger, C3HC4 type domain containing protein, expressed	11.733	11.9096	12.0714	11.2981	11.6454	11.6064	10.9776	10.8443	10.7648	11.1278	11.2528	11.1312	10.4877	11.5288	11.2931	10.4597	11.0157	10.9641	11.062	10.7979	11.2622	10.6173	11.2121	11.6053	10.5125	10.0919	10.7649	11.7277	11.5409	10.9975	10.3844	10.1742	11.2903	10.6482	9.89014	10.5077	8.60735	9.1182	10.0676	9.91504	9.56869	10.484	10.4238	10.8514	10.8743	11.7826	11.3608
Os01g0693400	AP2 domain containing protein RAP2.8 (Fragment).	B3 DNA binding domain containing protein, expressed	11.2286	11.9201	11.214	11.199	11.2457	10.6883	11.1311	11.8253	11.816	12.6466	12.8864	12.6493	11.3768	11.7052	11.1646	11.9085	12.1156	12.2482	10.0971	9.96775	10.1444	10.3873	10.2515	9.32993	11.5971	11.7899	12.6096	12.728	12.4884	12.14	10.213	10.6629	10.6474	10.2276	10.6586	10.8141	10.4717	10.9594	11.2127	11.7387	11.3202	10.3354	10.9899	9.83332	10.3439	11.0565	10.3901
Os01g0699500	Protein kinase domain containing protein.	STE_MEKK_ste11_MAP3K	7.78959	7.74452	10.1094	6.16712	5.85257	7.06737	7.89107	7.37154	7.99809	7.68773	8.30437	8.50568	6.92651	6.82079	7.06008	6.71801	5.84905	6.21907	8.6267	8.94317	12.5692	6.96037	6.8969	7.07221	8.3365	7.80505	8.93621	9.08587	9.05699	9.51481	10.4271	10.2945	11.4572	9.64451	9.75511	10.3105	9.89767	9.92706	11.3013	10.6127	10.0048	9.67159	9.73835	8.59893	7.93948	8.76807	7.94944
Os01g0699600	Protein kinase domain containing protein.	STE_MEKK_ste11_MAP3K	5.24264	6.57422	9.31083	4.05295	3.69738	5.41556	6.43088	5.30422	5.83237	6.05012	5.99658	6.43527	5.06435	4.08392	4.17091	6.374	5.48401	5.87964	8.57101	9.49556	11.8522	6.6748	5.00696	5.5328	8.77186	8.0706	9.28716	9.39929	7.74872	7.98648	11.5622	11.16	11.913	10.1717	10.3968	10.7973	10.2473	10.404	11.4052	12.0989	10.3811	9.78327	6.43551	4.18977	3.6074	5.61081	3.95197
Os01g0702700	Transcription factor MYB1.	MYB family transcription factor, putative, expressed	9.2157	8.74341	9.71957	8.86802	9.57347	9.91495	8.13588	7.41462	7.58449	8.06055	8.19007	9.097	6.34152	6.58822	7.45462	9.61818	9.19745	8.91506	12.3234	12.0395	12.4747	11.6565	11.9303	12.2903	10.5966	10.6942	10.5238	11.9693	11.7455	11.8113	10.0175	10.3656	10.2983	10.2186	9.9278	9.87358	9.71339	9.25466	9.86844	8.89739	9.53041	9.78415	9.03348	13.157	13.4554	13.2608	13.0528
Os01g0709500	Serine/threonine-protein kinase PBS1 (EC 2.7.1.37) (AvrPphB susceptible protein 1).	protein kinase family protein, putative, expressed	10.9499	10.9903	10.9012	10.2837	9.8467	9.89772	10.313	9.64115	9.74939	9.62572	9.96167	9.10047	9.88809	9.67781	9.8446	8.91789	9.69844	9.12597	9.80241	10.142	11.3548	10.1213	11.27	10.988	8.02779	7.80761	9.18553	8.57979	9.65443	8.59999	10.3501	10.3141	10.5487	10.336	9.64402	10.0545	9.60628	10.321	10.6918	10.0701	9.72261	10.4624	11.9834	12.1761	11.9661	12.3327	12.0845
Os01g0714600	Conserved hypothetical protein.	expressed protein	7.69264	8.86785	8.83597	8.08936	8.34507	7.75484	8.87297	9.27417	9.0278	9.59665	9.8229	9.37398	9.65392	9.01667	8.59179	9.57834	9.5486	9.03722	7.56222	8.95996	8.30568	8.64739	7.14842	7.67978	8.84442	8.61482	8.32986	9.68091	9.78938	8.01895	8.39329	8.64666	9.51062	9.36699	9.42432	10.0855	10.1815	9.59494	10.2363	9.88163	9.90288	10.9053	7.4117	4.78202	5.1473	8.01865	5.71406
Os01g0725000	(No Hit)	expressed protein	12.6583	12.5099	12.5525	9.99232	9.6798	9.28233	11.5972	12.0011	11.8195	10.23	10.2318	10.6189	12.6057	12.3884	12.2708	10.7071	10.5453	10.7582	11.1279	11.8741	11.3278	9.43268	8.9684	9.18774	10.6674	10.4725	11.1486	10.7104	10.7871	9.65053	8.6263	8.5898	9.42533	8.66531	8.2534	8.82419	8.91396	8.86318	9.80159	9.1964	8.90755	9.51932	11.2225	10.2918	10.0268	9.61462	8.58648
Os01g0727800	Protease-associated PA domain containing protein.	OsSub3 - Putative Subtilisin homologue, expressed	11.108	10.6862	10.9381	12.7461	12.5157	12.7161	13.2794	13.2075	13.0726	14.0642	13.8861	13.2528	11.2387	11.4921	11.3715	12.5499	12.591	12.8011	11.4893	10.792	11.3306	11.5942	12.6293	12.3705	11.9917	12.0301	11.3155	13.3926	13.3282	13.6325	11.2156	10.6538	10.9184	11.1386	10.5432	10.3025	9.24455	9.14796	9.71393	9.35088	9.85818	9.5863	8.95473	9.83967	9.94769	9.43835	10.0533
Os01g0740400	Protein of unknown function DUF1005 family protein.	stress-induced protein, putative, expressed	8.54219	7.75449	9.20243	6.55342	6.32277	7.27709	7.3214	6.10629	6.477	5.25538	6.1068	5.65142	8.14404	7.34274	7.51675	6.07739	5.72598	7.10498	10.4937	9.45084	10.7691	9.85998	10.0953	10.3041	8.04885	8.27428	7.78121	8.71663	9.38326	9.53936	10.7949	10.4188	11.4515	10.4281	9.78727	9.87092	8.39073	8.74089	10.0271	8.94419	9.06272	9.89405	9.9366	10.6386	11.1766	9.15037	10.7425
Os01g0744000	Kinesin heavy chain (Fragment).	kinesin motor protein-related, putative, expressed	8.44928	8.19227	9.03186	7.43378	7.5914	8.43082	7.52672	7.3944	7.20217	5.52652	6.39638	5.80687	6.26001	6.16931	6.01649	5.39909	5.38639	4.50708	12.1811	11.2668	11.5428	12.2147	12.6582	12.6283	6.91759	6.88876	8.15969	5.33246	6.87197	6.94831	11.1527	11.2193	11.3795	11.3458	10.8533	10.7514	9.20148	9.12788	10.2117	9.37738	9.53755	10.3029	14.2402	13.9621	13.9371	11.0932	13.7863
Os01g0744400	Tropomyosin family protein.	retrotransposon protein, putative, unclassified, expressed	7.84747	7.62479	7.18107	8.41888	8.17787	7.70627	8.27382	7.57674	7.55903	8.61997	8.30553	7.90589	8.05904	7.70713	7.63973	7.87386	8.32414	7.95535	8.62774	8.20161	8.76142	8.87479	9.17795	9.13295	7.66508	7.42112	7.49679	7.98452	8.2604	8.2328	9.26958	8.88296	8.94013	9.33974	8.83514	8.53557	7.89323	8.14792	8.64286	8.29651	8.07467	8.68647	9.85298	10.0968	9.87148	10.3588	9.93349
Os01g0745400	Non-protein coding transcript, unclassifiable transcript.	No Hit	2.22684	3.12073	3.81296	3.70625	3.77368	3.38305	2.99523	3.41679	3.49869	3.13592	3.59756	3.42066	3.45652	3.01582	2.73463	2.66698	3.32051	3.1056	10.3269	9.23942	8.1639	10.26	9.76663	9.83335	2.65636	5.03347	6.46305	2.79543	3.95494	5.38234	9.27535	9.4972	9.53482	9.16376	9.27623	8.58412	6.81105	7.06959	7.99397	7.65404	7.64155	8.65179	12.556	11.3902	11.5103	9.51077	12.138
Os01g0746400	Conserved hypothetical protein.	transposon protein, putative, unclassified	3.04701	2.66224	3.34079	3.75266	3.36856	4.6394	2.19383	2.67968	1.99247	1.58023	3.01392	4.08779	3.12415	2.51031	2.30439	3.63663	2.82952	0.56895	2.65183	3.24622	3.18483	3.52873	3.52881	3.11036	3.51837	4.76552	4.31621	3.6848	2.51981	2.21034	2.70262	4.59921	2.1939	1.91865	5.29457	2.78718	6.83154	5.90496	3.68916	3.98303	5.62178	4.26196	3.69102	2.69305	2.23228	2.87067	3.07359
Os01g0747300	Uncharacterized plant-specific protein DUF506 domain containing protein.	plant-specific domain TIGR01615 family protein, expressed	13.2815	13.7592	13.586	10.792	11.0071	12.6879	11.4126	11.5247	11.6355	8.28609	10.1837	9.64127	10.4837	11.1593	10.9445	8.67772	8.22479	8.17732	11.6	12.0077	11.9936	11.8547	11.6845	12.0704	10.4596	10.0385	10.9767	10.3162	12.1391	11.8459	10.8245	10.5843	11.223	11.8879	11.6389	12.3487	9.55936	9.80641	12.1984	12.2479	11.7038	12.4708	10.5497	11.0172	11.0593	13.7969	12.3709
Os01g0748900	Membrane attack complex component/perforin/complement C9 family protein.	MAC/Perforin domain containing protein, putative, expressed	9.69949	9.42614	9.45632	9.54851	9.40989	9.18762	9.63193	9.6207	9.48046	10.1543	10.1309	9.74922	9.75278	9.68815	9.05214	9.67823	9.78784	9.44092	9.51719	9.74917	9.18459	9.65759	9.60043	9.26442	9.53409	9.15249	9.46299	10.4535	9.94421	9.58046	10.4017	9.70498	10.1484	10.5436	9.41448	10.0423	9.31875	9.68724	10.4915	10.3364	9.84757	10.2252	9.61473	9.73856	9.76312	10.0158	9.67211
Os01g0753800	Conserved hypothetical protein.	expressed protein	3.43856	1.50393	4.37088	2.17361	0.954701	3.19007	1.83026	1.6263	1.45804	-0.416738	1.67171	4.08887	1.60892	1.59775	0.907037	3.1195	1.11737	7.97362	14.0599	11.5189	14.4455	12.94	14.0802	14.3619	3.54887	4.89631	6.19749	2.94557	3.36431	4.92326	9.5963	9.71211	9.7288	9.96307	10.0186	10.1334	8.14553	8.33632	8.75923	9.38447	9.22906	8.56943	12.0712	13.8761	13.9773	10.7845	14.2357
Os01g0755500	Transcription factor PCF7 (Fragment).	slTCP3, putative, expressed	6.84102	6.27809	6.49389	7.22232	7.76499	7.58782	6.51801	6.66356	5.86768	7.21105	7.54966	7.119	5.79394	5.91247	5.88958	6.69092	6.54519	6.4036	11.5988	11.5198	10.1289	12.9056	12.2189	11.6196	5.54713	4.85075	6.07936	6.34016	7.48538	7.54281	3.44197	5.12827	3.52928	4.18884	5.44278	4.47362	4.74322	4.51491	2.92155	4.00707	4.73201	2.80034	11.3985	10.9912	11.2781	8.82867	11.2802
Os01g0758700	Hypothetical protein.	No Hit	9.46919	9.34236	8.47176	8.87774	8.54472	7.901	9.03116	7.66266	7.40283	8.49842	7.90818	7.19737	6.17518	6.03029	6.11902	6.46411	6.72041	5.97254	9.4701	9.80899	9.99034	9.82156	10.1272	10.3722	8.31294	8.45012	9.18586	7.72855	8.36192	8.58475	10.2625	9.45915	10.0018	10.5438	9.09731	9.65797	8.22058	8.80437	9.27078	9.36356	8.94429	9.61729	10.2013	10.618	10.2676	10.9178	10.9267
Os01g0766900	CSLC7 (Fragment).	CSLC1 - cellulose synthase-like family C, expressed	8.41077	7.98337	8.84439	9.27031	9.23394	8.85115	9.62089	9.87729	9.49278	9.70218	9.72125	9.07075	9.31397	9.37663	9.1164	10.0231	10.2028	10.5819	10.4212	10.1019	10.4437	10.4686	10.6378	10.6828	9.72438	9.36524	9.6279	10.3338	9.98136	9.73445	11.0072	10.4981	11.0915	11.1681	10.6466	10.4548	9.40631	9.24628	10.5449	9.37	9.8411	10.3619	11.6787	12.0404	11.9206	10.7225	11.4138
Os01g0769000	Conserved hypothetical protein.	expressed protein	9.94947	9.71931	9.76643	9.19507	9.17858	9.00291	9.73253	9.73619	9.62257	9.50904	9.51509	8.68879	9.94331	10.335	9.75554	9.28273	9.81336	9.98915	9.14232	9.63189	9.5341	9.73587	9.80852	9.73475	9.81119	8.98811	9.97794	9.96106	9.77289	9.17194	10.0985	9.79624	10.2077	10.4774	9.68442	10.1683	8.92497	9.00679	9.71386	9.8005	9.54996	9.74799	9.19507	9.81503	9.5082	10.0605	9.95856
Os01g0785900	Zn-finger, C2H2 type domain containing protein.	ZOS1-12 - C2H2 zinc finger protein, expressed	2.46502	3.01606	3.93422	2.83057	2.1631	3.11938	6.78248	3.21406	3.3001	2.37279	3.14895	3.14275	2.73189	2.7593	3.24172	2.58799	2.79638	2.93431	11.0113	10.1269	9.53683	11.3429	11.328	11.0805	3.31449	5.57034	5.08286	3.36069	3.54607	5.05664	7.49829	7.64702	7.73672	7.25347	7.2472	6.56736	6.16127	6.11333	6.514	5.83305	5.86802	6.19619	11.1576	10.7971	10.9246	5.94207	11.0124
Os01g0786500	Plastocyanin-like domain containing protein.	early nodulin 20 precursor, putative, expressed	1.93309	0.353312	0.756324	2.18703	1.66807	1.00577	2.84578	1.03255	1.43375	2.57646	1.85192	0.546539	0.949367	1.20017	1.19148	1.35815	1.83945	-0.650135	10.5663	9.41979	10.5611	10.6043	10.4306	10.0663	2.1045	-2.41387	3.24245	0.781054	1.86506	2.92459	10.7546	10.5567	10.7897	10.5996	10.0779	9.72615	7.72312	7.89858	8.78823	9.24353	8.8733	9.188	9.51345	11.8316	10.9843	1.83391	10.0614
Os01g0787000	Haem peroxidase, plant/fungal/bacterial family protein.	peroxidase precursor, putative, expressed	7.96408	7.3078	8.81653	8.26943	7.96633	8.60473	6.56128	6.25963	6.54754	7.07998	7.13564	7.70835	8.89218	8.01306	7.52514	8.01527	8.2803	8.04169	8.24084	9.45742	8.75901	8.96329	8.02724	8.21967	8.74192	9.35825	8.38293	9.54635	8.88959	9.38262	10.0727	10.1757	10.5459	10.5068	10.6298	10.9292	10.1556	10.0208	10.2482	10.0541	10.0874	10.2172	2.93802	6.96552	6.31484	10.4811	6.26048
Os01g0797600	Ethylene responsive element binding factor3 (OsERF3).	AP2 domain containing protein, expressed	13.5759	13.4254	13.1935	14.4043	14.2189	14.3455	13.7969	13.8834	13.3502	13.8094	13.7224	14.046	12.4827	12.4558	12.3336	12.6246	12.1793	12.1148	13.3258	13.5912	13.1596	13.4403	13.0248	13.2404	12.994	12.8205	13.3258	14.2696	14.0917	14.1626	12.1513	12.0157	12.8311	12.6257	11.7829	12.4696	11.4883	11.9175	12.8088	12.7125	12.2388	12.7461	13.7436	12.4255	12.456	13.2962	13.2719
Os01g0819100	Protein kinase domain containing protein.	inactive receptor kinase At2g26730 precursor, putative, expressed	5.68838	5.70181	5.9873	4.85193	5.30408	5.65708	5.52896	5.32913	6.04277	4.43529	4.5092	4.10787	3.4434	4.071	8.00799	2.96348	4.02148	3.92771	11.2953	11.2	10.4334	12.172	12.0085	11.6996	5.08793	6.25402	6.43959	5.13998	5.31538	5.18571	10.4731	10.622	10.3712	10.6808	10.8864	10.0298	7.99752	8.33267	8.97405	8.65335	8.90786	9.02458	12.4815	12.1883	12.0374	8.91465	12.0254
Os01g0819200	Synaptotagmin C.	NTMC2Type1	3.56622	3.74564	1.35179	0.770208	2.24593	3.3395	2.07399	2.39757	1.60216	0.639028	2.61143	-0.0653336	4.53508	2.96032	1.57866	3.16659	2.75592	3.25938	5.70251	3.43094	5.9411	4.71436	5.8219	5.75508	2.64996	3.93318	3.90707	3.45592	1.67562	2.23204	4.89862	4.81169	4.99895	5.28302	5.31735	6.00077	4.97369	4.70432	4.18604	5.27937	4.73733	4.50447	3.79163	5.12375	5.13862	5.90834	6.10714
Os01g0821600	DNA-binding WRKY domain containing protein.	OsWRKY21 - Superfamily of TFs having WRKY and zinc finger domains, expressed	2.5397	2.2832	4.05649	3.15697	2.26895	3.66983	4.40859	3.72342	4.39076	3.55429	3.50041	3.68057	3.27132	3.45406	3.63215	3.7811	3.108	3.98059	5.30061	7.3742	6.90119	5.01439	4.12051	4.14997	7.03719	6.446	6.58697	6.82556	6.8308	6.30879	6.18991	6.02404	6.31891	6.16326	6.24331	5.73117	7.66868	7.81897	7.5422	7.77531	7.03171	7.73232	2.76782	2.98839	2.15926	4.71038	2.55778
Os01g0821900	Protein kinase domain containing protein.	receptor-like protein kinase precursor, putative, expressed	5.33951	5.47813	5.11493	5.65283	5.79549	4.89154	6.27363	6.28849	5.86972	7.19884	6.96711	5.84233	6.11672	5.99376	5.84586	6.69832	7.75131	6.94691	11.9202	11.9198	10.9375	12.5853	12.4841	12.186	5.88828	4.28541	5.66421	5.04831	6.04255	5.48572	10.831	10.4626	10.2199	10.7199	10.345	9.56519	9.09335	8.59722	9.2398	9.03948	9.27145	9.27157	13.7999	13.4549	13.3113	7.26876	13.248
Os01g0823500	Uncharacterized plant-specific domain containing protein.	DUF623 domain containing protein, expressed	6.48325	6.63798	5.88903	6.40247	6.89976	6.00233	7.86407	7.40016	7.4803	4.91239	5.32616	6.12479	6.06861	6.01665	6.03695	3.36499	3.16241	4.02858	7.85776	7.16636	8.30393	6.72577	8.25129	8.67043	5.54031	5.78877	6.2906	4.72736	6.24764	6.88117	5.89452	5.98835	5.67965	5.94439	6.27383	6.09066	5.36305	5.72926	5.36357	5.37113	5.35473	6.56025	5.63596	6.97387	6.97571	9.89245	7.57678
Os01g0824500	(No Hit)	expressed protein	3.54018	3.06748	2.95778	1.70029	3.48554	3.13185	1.76632	3.06	3.71403	2.02293	2.15791	3.10376	3.7408	2.795	0.875998	4.09257	1.94046	2.57908	9.05537	8.23462	6.29866	8.72585	8.71645	9.18853	4.49459	5.21651	4.09839	2.377	1.3297	5.02671	3.86074	3.44322	3.62416	3.60658	3.8159	3.34212	4.59633	2.95972	2.0557	2.91066	3.0742	3.30542	10.5138	8.91644	9.125	3.60486	10.4839
Os01g0829100	Major sperm protein domain containing protein.	ankyrin homolog precursor, putative, expressed	6.94805	7.21245	7.71459	7.49861	7.78111	7.62233	9.1256	8.74383	8.59691	8.59104	8.31846	8.12761	7.57726	7.77303	8.02862	8.01176	8.09011	8.95221	11.5217	10.2587	12.1004	11.5252	12.0502	11.9267	9.22867	8.65509	9.10099	10.6093	10.0197	9.81732	11.1555	10.7676	11.4934	10.8268	10.4415	10.1925	9.52271	10.1996	10.8985	10.9535	10.4947	11.1179	11.138	12.3925	12.2029	10.4892	12.2173
Os01g0835000	RabGAP/TBC domain containing protein.	TBC domain containing protein, expressed	9.35244	8.77387	8.97794	9.54827	8.9189	8.57064	9.22301	8.45888	8.49431	9.66295	9.29101	8.70121	8.44715	7.98902	7.82692	8.73889	8.97895	8.33454	10.7143	10.3145	10.8555	10.4304	11.1902	11.3756	8.21194	7.93978	8.81576	8.14827	8.92884	8.47409	11.4447	10.5311	11.1339	11.2667	9.77741	10.1086	8.97726	8.9835	9.9781	9.74475	9.14378	10.0672	11.9955	12.5307	12.3667	10.536	12.1188
Os01g0844500	Peptidase A1, pepsin family protein.	aspartic proteinase nepenthesin precursor, putative, expressed	9.15773	8.67758	9.69433	7.21959	7.15343	7.72549	8.79815	8.50057	8.99513	6.98063	6.99631	7.86899	7.39486	6.85926	7.04929	6.43049	6.20421	7.67768	11.8199	11.6456	11.8424	12.6821	12.255	12.1335	9.35718	9.20997	9.87578	8.36249	8.69902	9.0992	9.87107	9.95651	10.103	9.61855	9.46155	9.48695	9.75017	9.59824	9.60699	10.1833	9.09659	8.80005	12.8654	12.3565	12.6994	10.5913	12.3909
Os01g0853400	Coronatine-insensitive 1.	OsFBL4 - F-box domain and LRR containing protein, expressed	11.9882	12.04	11.2506	11.9149	11.9702	11.3431	12.184	12.2381	11.6311	12.1242	12.2062	11.6562	12.2784	12.861	12.2637	11.8973	12.2722	11.8841	11.7723	12.3793	11.6961	12.3659	11.8915	11.9103	12.6316	12.3608	13.4073	13.7447	13.0399	13.1305	11.8481	11.7276	11.8301	11.9162	11.2667	11.7446	11.7362	12.273	12.2106	11.9736	12.458	12.4628	12.4199	12.7446	12.4877	12.707	12.9357
Os01g0865800	AOBP (Ascorbate oxidase promoter-binding protein).	dof zinc finger domain containing protein, putative, expressed	3.11404	1.9375	2.8038	1.44943	2.51673	1.99715	1.05236	2.11222	2.32743	0.994789	1.89277	2.94335	4.51175	2.96266	2.34382	3.38743	1.376	2.05706	6.02595	4.22238	6.28151	5.14635	5.91173	6.42729	3.93249	3.59564	3.46827	1.12104	1.57571	3.58291	4.83587	5.42067	5.4925	4.55552	5.34538	4.85331	4.90147	4.32244	3.27288	3.33389	4.63852	2.76751	2.27243	5.83184	6.92312	6.03711	6.37391
Os01g0867700	Protein of unknown function DUF649 domain containing protein.	Yip1 domain containing protein, expressed	9.65763	9.74056	9.08738	10.292	10.1678	9.67559	9.37102	9.52487	9.72461	9.76904	9.88286	9.30918	10.2516	10.0809	9.88372	10.0561	10.1493	10.3196	9.82788	9.80471	10.1507	10.5449	10.7549	10.7013	8.84222	7.97056	8.09288	9.36772	9.85805	9.0216	10.7377	10.6628	10.7588	10.8064	10.6513	10.5241	9.78568	9.43541	10.2838	9.1761	9.59953	10.1138	10.8864	11.6387	11.6526	11.1073	11.2735
Os01g0875300	UspA domain containing protein.	universal stress protein domain containing protein, putative, expressed	5.54709	3.87132	5.94479	4.39219	4.56613	6.26334	5.64855	5.8497	5.52899	4.26857	4.78567	5.18928	2.73988	3.78453	3.22651	3.98818	3.69658	4.18322	11.6213	10.2633	10.5564	10.9674	11.1156	11.2193	6.7072	7.83659	6.81062	6.47713	7.03181	6.63233	10.4879	10.2722	11.3386	10.2439	9.23426	9.05867	8.51978	8.54997	9.82878	8.30895	8.96744	8.88362	11.9351	11.9894	12.4157	8.0515	11.7293
Os01g0880200	Glycosyl transferase, family 8 protein.	glycosyl transferase, putative, expressed	10.2073	9.24469	11.1771	12.8913	12.6506	13.1556	9.91228	9.25332	8.9745	12.2607	12.3962	11.8571	7.24358	7.43545	7.40087	8.87068	9.15205	8.8932	11.5991	10.3474	12.4981	11.8909	12.3283	12.6876	10.2531	10.2025	10.5452	12.3303	13.0795	12.8446	11.1511	10.685	11.0607	11.572	11.1827	11.5465	9.53218	9.18471	10.1656	9.79133	9.5106	10.0529	10.8456	11.517	11.5711	13.3259	11.8846
Os01g0882100	Thioesterase superfamily domain containing protein.	No Hit	3.68337	3.86915	5.88099	3.86918	4.02821	3.89766	3.66387	3.15787	2.90547	2.71553	2.94665	2.66189	4.94372	4.73071	6.63559	4.55183	4.17751	4.06434	5.07591	5.39636	6.78139	5.4013	4.89275	5.9474	4.99215	0.424827	3.01237	2.11849	1.44303	4.77962	2.14405	2.78036	1.67526	5.2385	4.40644	5.48642	4.24747	3.76451	4.47906	2.82428	3.6023	2.19237	3.1593	5.17936	5.45178	3.90952	5.09805
Os01g0883900	Putative methyltransferase DUF248 family protein.	methyltransferase, putative, expressed	8.03553	7.9055	8.29337	9.14013	8.88521	9.05526	8.32334	7.97695	8.14917	9.16531	9.00302	8.36016	9.23359	8.82211	8.66368	9.56146	9.45936	10.0485	11.6642	10.8869	11.6569	11.6799	12.1055	12.476	8.62638	8.67176	9.2462	9.05132	9.85238	9.96392	11.7199	11.2129	11.5322	11.8998	11.1012	11.3456	10.6961	9.98093	11.2459	10.5448	10.456	10.8236	12.5874	12.8822	13.093	12.0449	12.8325
Os01g0897700	Formin-like protein.	formin-like protein 1 precursor, putative, expressed	5.16342	4.47052	6.65539	4.74504	4.62226	6.13508	4.15332	3.26659	3.99697	4.06426	4.47364	4.72306	4.12226	3.80865	2.83695	3.83333	4.68335	4.27092	8.82221	7.56385	9.28742	8.06127	8.76853	8.52946	5.92015	6.39283	6.90731	5.14932	5.75529	6.53559	9.35025	9.10909	9.16945	9.11245	8.7275	8.59035	8.43903	8.20688	8.55459	7.86311	7.78645	8.48406	9.6372	10.4226	10.5615	10.2667	10.2095
Os01g0901000	Arm repeat-containing protein.	armadillo/beta-catenin repeat family protein, putative, expressed	7.91344	8.11763	8.09117	7.88905	7.93756	8.33433	8.43367	8.63607	8.57716	8.15855	8.51412	7.98115	7.76172	8.10112	7.71225	7.50607	8.20838	8.15232	9.57628	9.66783	9.07258	10.3927	10.1978	10.0923	8.96861	8.87459	9.28664	9.7438	9.82955	9.46823	11.1986	11.0796	11.2538	11.3188	11.1753	11.1058	9.85424	9.86384	10.5813	9.70909	10.2134	10.7236	11.6436	10.7095	10.5869	11.4194	11.0858
Os01g0926600	Pectin-glucuronyltransferase.	exostosin family domain containing protein, expressed	8.87132	8.30824	10.3587	7.30079	7.58234	9.37765	7.98998	7.89919	7.56254	6.74078	7.53135	7.08211	5.55455	5.41681	5.04532	5.2786	5.61615	5.75485	11.781	10.9765	12.5613	11.5075	12.2893	12.3861	9.28292	9.20298	10.0636	10.3075	11.1078	10.6812	12.208	12.0772	12.627	12.233	11.8254	12.1748	10.5142	10.5261	11.6301	10.7308	10.8323	11.5116	11.2628	12.4637	12.5998	13.1295	12.6721
Os01g0931200	ARM repeat fold domain containing protein.	expressed protein	3.97133	3.56666	4.16031	3.57971	3.76016	7.40033	4.20625	3.99472	3.91597	3.46633	3.48759	4.13369	3.52815	3.15768	3.61956	1.71228	2.49613	3.5148	11.7764	11.2194	7.76875	12.2974	11.5905	11.1146	4.78105	5.77998	4.27751	2.60181	4.42743	4.64834	10.7713	10.6537	10.5566	10.7617	10.4661	9.84925	8.04749	7.9637	9.11511	8.21712	8.92805	9.45163	12.813	12.0862	12.1547	2.70998	11.7915
Os01g0942900	Ankyrin repeat containing protein.	expressed protein	12.7236	12.759	12.0998	11.5257	11.6186	11.016	12.5376	12.3945	11.9475	11.4797	11.4408	10.3452	12.3864	12.6671	12.3447	11.4672	11.7191	11.6786	11.6956	11.7761	11.7102	11.4709	11.5042	11.6015	11.6379	10.9964	11.5101	10.5297	10.8913	9.93552	11.3493	11.2762	11.2101	11.4076	10.7865	10.8051	10.8014	10.7281	10.919	11.1525	10.6254	10.8574	12.3438	12.4241	11.9176	11.9579	12.2039
Os01g0947900	(No Hit)	No Hit	5.6875	5.48788	6.11792	6.17437	6.0148	5.91521	6.02505	6.18464	5.86179	6.45732	5.98435	6.69604	5.94487	4.97048	4.67604	6.26176	5.67638	5.12846	6.53661	6.41859	6.8367	6.37669	6.83301	6.82921	7.18947	7.49436	7.30955	9.18402	7.55316	6.59414	7.76993	7.54304	7.97886	8.05575	7.06084	7.55278	8.06595	8.01194	8.53626	8.23394	7.41318	8.44721	6.59555	6.44336	5.80468	7.6251	6.77395
Os01g0948000	(No Hit)	No Hit	5.50438	5.38862	5.95008	6.16662	6.1765	6.20624	5.86088	5.25467	5.58923	6.49417	5.90616	6.58816	7.11897	4.80669	5.20205	6.01815	5.56464	5.4105	6.49736	6.61977	6.95766	6.29668	6.72346	6.80195	7.17758	7.64409	6.81672	9.13565	7.68281	6.44244	7.75853	7.54031	7.91504	7.98837	7.06125	7.63715	7.80951	7.92215	8.46581	8.26185	7.42223	8.38495	6.62746	6.50349	5.61786	7.66909	6.68285
Os01g0952900	Conserved hypothetical protein.	expressed protein	4.62072	4.60594	6.66426	5.60378	6.1381	5.78682	5.34546	5.65792	6.17683	7.68919	7.58364	7.06671	5.18342	5.16959	4.60183	6.3005	6.51433	6.33013	6.158	5.93229	7.46133	4.0994	3.78399	4.22404	5.576	5.63683	5.10627	5.45343	5.50022	4.76502	5.73856	5.80036	7.52499	5.83725	6.27849	6.18031	5.96339	5.73118	8.79341	6.39847	5.52134	5.88227	1.76756	2.66356	1.68406	3.13276	2.07175
Os01g0955100	Regulator of gene silencing.	OsCML31 - Calmodulin-related calcium sensor protein, expressed	7.17017	8.99494	9.43018	6.26455	6.12961	6.38506	7.72143	7.7814	7.71597	6.33785	6.43994	6.55069	8.3937	8.37886	8.10899	6.14458	6.41559	6.73625	7.98396	9.38554	8.91281	5.85018	4.65919	5.45256	7.27236	7.37632	7.42446	7.42587	6.26319	4.91259	9.47807	9.37281	10.4568	9.04769	9.43406	9.48165	8.75917	8.98638	10.1897	9.67685	9.28307	10.0301	1.70258	2.53904	2.33254	6.65457	1.76908
Os01g0963800	Hypothetical protein.	expressed protein	4.0236	2.1756	4.54192	6.32185	2.14172	4.1807	3.99736	3.45937	4.18527	3.89481	1.65642	3.39489	2.14681	2.32319	3.55559	2.934	1.66243	2.82392	8.6874	8.04953	5.46297	8.34337	7.9687	8.55117	-1.72218	3.76077	-0.0476712	2.17539	-0.588832	1.43386	6.31224	6.64468	6.13788	5.87065	5.92093	5.18441	5.32522	4.55195	4.75109	5.45159	5.18993	4.03009	10.91	9.9326	10.1037	2.08408	9.98173
Os01g0972000	Protein of unknown function DUF1117 domain containing protein.	zinc finger, RING-type, putative, expressed	6.85507	6.45016	6.91602	7.06013	6.33168	6.37062	6.65963	6.59705	6.93103	8.49038	7.84923	7.53585	7.09891	6.89006	6.86832	7.29512	7.88133	8.55275	5.48945	6.5117	6.13184	5.92149	5.70518	6.02844	6.30424	6.36233	6.07414	7.60019	7.75583	7.02472	5.38007	4.53797	5.2067	6.04454	5.45229	5.5002	4.83892	5.75368	5.96845	6.38029	5.7021	6.47385	6.04835	4.54297	4.79678	6.99952	5.68762
Os01g0975000	Protein of unknown function DUF966 family protein.	domain of unknown function DUF966 domain containing protein, expressed	6.0435	5.58613	7.3836	5.80421	5.47574	6.45402	5.57823	5.22426	5.826	4.83415	5.15637	5.35346	7.58985	6.60329	6.54713	5.21655	5.42732	5.53504	6.07309	7.27696	7.25548	6.29215	5.94036	6.63672	6.84018	6.48351	5.14042	6.22936	6.14667	5.87306	7.89062	8.18301	8.35503	8.00672	7.91987	7.8419	6.91551	7.48719	7.7467	6.50788	6.55752	7.62031	5.33257	5.53342	6.16009	6.13304	5.1693
Os02g0138000	Leucine-rich repeat, plant specific containing protein.	retrotransposon protein, putative, unclassified, expressed	6.63336	6.00559	8.64095	3.95073	4.37969	7.19295	4.55486	3.68048	3.35344	3.81288	3.4551	4.81739	3.33638	3.63299	3.58116	3.21764	3.02746	2.52477	8.66544	8.76649	8.27553	9.5616	9.72238	9.50103	5.4016	5.44442	4.3714	4.65651	5.70773	5.59703	11.3132	11.1531	11.4971	10.7889	10.8758	10.1348	8.43822	8.25859	9.84054	8.69393	8.99538	9.97121	11.3926	11.4037	11.3063	6.03559	10.4403
Os02g0150300	FAD-dependent pyridine nucleotide-disulphide oxidoreductase domain containing protein.	apoptosis-inducing factor 2, putative, expressed	9.17246	9.35411	9.12335	9.90093	10.1614	9.60345	9.38934	9.2777	8.90466	10.045	10.1309	9.92981	9.34809	9.71694	9.36408	10.0713	10.1475	9.83827	11.3717	10.9896	10.9053	11.1257	11.1135	11.4408	9.99667	10.1401	10.5298	11.0652	10.212	9.77788	11.9145	11.2748	12.1251	12.1679	10.9135	11.3154	9.69987	10.1681	11.3226	10.9411	10.6533	11.5311	11.5572	12.6472	12.2946	12.4832	12.3094
Os02g0154700	Leucine-rich repeat, plant specific containing protein.	No Hit	3.56511	3.93311	5.21023	3.66496	4.28731	4.48211	4.3831	4.06921	4.50029	5.28524	4.79753	4.94737	3.57532	3.99179	4.35638	3.51025	3.40996	4.83703	5.01913	4.20745	5.32696	4.95814	5.47605	5.93017	4.32939	4.35951	4.73525	5.03218	4.52174	4.58772	4.61513	5.08725	4.64217	5.04345	5.21835	5.16989	6.34233	5.34387	5.04299	5.37228	4.88154	5.19991	4.41982	3.49606	4.31074	4.691	3.4485
Os02g0164300	Glycosyl transferase, family 31 protein.	galactosyltransferase, putative, expressed	10.7714	10.5439	11.0321	10.4519	10.4286	10.7967	10.1181	9.21582	9.13068	9.59234	9.39467	9.27539	8.69315	9.09023	9.34675	8.42504	9.25961	8.75643	10.9677	10.2699	11.6319	10.3316	10.8335	11.3998	9.50219	8.91375	9.52659	9.19865	9.49334	9.89125	10.946	10.7689	11.1116	11.2683	10.7376	10.8781	9.60589	9.69748	10.3343	10.3991	9.85886	10.32	10.4602	11.6933	11.2744	12.979	11.7325
Os02g0180000	Protein phosphatase type-2C.	protein phosphatase 2C, putative, expressed	6.54083	5.86461	7.1296	5.87827	5.81362	6.27838	7.45307	6.78601	7.16319	6.38793	5.96659	6.72227	6.47944	6.57363	6.63343	6.52509	5.83301	6.2054	7.84402	7.10455	8.13036	8.04165	8.50985	9.0846	8.21167	8.18017	8.91403	7.77846	7.20504	7.65123	9.24221	8.76344	9.08148	9.16906	8.5447	9.00915	8.11622	8.45804	9.19498	9.37489	8.53982	8.57417	6.96452	8.48132	8.77044	10.3355	9.05957
Os02g0192500	Beta-1,4-mannan synthase.	CSLA1 - cellulose synthase-like family A; mannan synthase, expressed	8.81182	8.12019	9.82693	8.03752	8.07748	10.1632	7.58523	4.89418	5.80442	7.0812	6.93492	8.09216	3.47001	3.13162	3.69776	3.89948	3.40538	3.09711	12.6772	11.547	11.9419	12.6331	12.849	12.8331	6.90628	7.77057	7.86374	8.01537	10.7706	10.7663	13.9407	13.6018	13.7029	14.073	13.7528	13.6151	11.2668	11.2948	12.2905	11.9108	11.6934	12.0926	13.6808	13.5451	13.8103	11.9502	14.1175
Os02g0203600	(No Hit)	No Hit	6.65979	7.02867	7.9248	7.43708	7.86085	8.224	6.76257	6.6317	6.71773	5.86723	6.22408	8.37033	4.43413	4.51611	5.94412	4.59205	5.71731	6.15528	5.31841	4.62021	6.79009	4.43215	5.48279	5.94395	6.10511	6.5636	6.607	5.26643	5.67054	7.34712	6.72552	7.13653	7.87038	7.19009	7.413	8.24491	11.3431	8.9712	7.87922	9.16883	8.8774	7.33407	7.97098	5.18797	5.19333	6.88347	5.51341
Os02g0219700	CD9/CD37/CD63 antigen family protein.	No Hit	7.86338	8.10116	8.3331	7.04935	7.28246	7.79486	7.02089	7.7714	7.94805	7.32838	8.00257	8.12768	8.89942	8.84761	9.27132	8.58289	8.27866	9.16552	8.68403	7.88794	9.04056	7.91509	8.45371	8.99931	7.14774	7.38678	5.98804	8.8433	8.93983	8.5126	7.54485	7.54025	8.16045	7.04677	7.22355	7.90456	9.34894	8.78617	8.36381	7.95766	8.49142	9.05021	9.91946	10.2054	10.7781	7.75826	10.0816
Os02g0232500	Leucine-rich repeat, plant specific containing protein.	leucine-rich repeat-containing protein kinase family protein, putative, expressed	9.07076	8.58588	8.65191	8.85133	8.32666	8.32384	7.46971	6.72536	6.80398	7.92543	7.57956	7.18983	6.98328	6.73923	7.17004	6.93616	7.56217	6.83576	6.87395	7.24806	7.62919	7.06049	7.42402	7.77068	8.3526	7.61215	8.21353	7.06022	7.6236	7.53273	6.20121	5.93659	5.70828	5.85523	5.97023	5.94357	6.56292	7.37678	7.49594	7.68627	7.00372	7.30797	8.60904	7.92573	8.01357	7.30383	8.39241
Os02g0273000	Uridine kinase-like protein.	uridine/cytidine kinase-like 1, putative, expressed	6.37227	6.32504	7.04568	6.30408	6.29446	6.65412	8.1001	7.62184	7.18226	7.11981	7.31759	6.56416	6.27103	6.59054	6.51563	5.92434	6.36734	5.87706	8.71289	8.06412	8.68313	8.00003	8.24715	8.51804	7.24421	6.44178	7.98005	7.01642	7.18511	7.05647	8.75906	8.56753	8.94566	9.14804	8.27163	8.43381	6.77838	7.11237	8.44279	8.09814	7.46136	8.27067	9.95838	10.1809	9.74653	10.6576	10.2546
Os02g0326600	Pattern formation protein EMB30.	pattern formation protein EMB30, putative, expressed	10.0557	10.2642	9.83156	9.73169	9.82819	9.28182	10.2717	10.5942	10.4364	10.4104	10.6365	9.89745	11.4795	11.2778	10.5004	10.5166	10.6425	10.5074	10.8052	10.7572	10.4162	10.6668	10.689	10.4492	10.6263	10.3983	10.5889	11.2929	10.8937	10.0354	11.0222	10.7406	10.9737	11.0462	10.0223	10.5517	9.64623	10.1252	10.729	10.7541	10.1421	10.4965	11.354	12.0427	11.8815	11.2439	11.4986
Os02g0433900	Hypothetical protein.	expressed protein	5.91578	6.18764	6.63366	6.41317	6.55034	10.0022	5.32533	5.42545	5.32045	5.29282	5.32642	5.8408	4.90116	5.27796	5.50887	4.99296	5.09917	5.3691	10.0776	8.45667	9.3858	9.20854	9.71838	10.1685	6.13334	6.37058	5.51	5.68438	5.82591	5.62515	8.66955	8.75813	9.39563	8.71678	8.31988	8.40929	7.01474	6.95016	7.37893	7.14927	6.88914	7.68892	11.5242	11.2991	11.222	8.70762	11.356
Os02g0439200	Hypothetical protein.	retrotransposon protein, putative, unclassified, expressed	8.61917	8.83429	8.52317	7.75181	7.84056	7.91387	8.11304	8.89156	8.41806	8.08958	8.73998	7.37817	8.00472	8.55111	8.04159	8.19957	8.41752	7.74915	8.07212	8.39746	8.13377	8.29042	8.42289	8.32302	5.4929	5.91905	5.86483	6.19356	8.14724	7.07183	8.27955	8.12128	8.36072	8.35154	8.1772	8.32352	6.89221	7.11428	7.26656	6.27624	7.04841	7.6829	9.79886	9.90455	10.3466	10.6581	10.4016
Os02g0460000	Conserved hypothetical protein.	transposon protein, putative, CACTA, En/Spm sub-class, expressed	7.55044	7.2573	7.87642	7.02746	6.16675	6.2123	8.27828	7.91196	7.76898	5.00405	4.90034	5.40341	5.87987	6.72185	6.77603	4.44689	3.76687	3.85074	5.52024	4.59308	4.59675	5.60289	5.57869	5.41544	6.59953	5.74704	5.87807	3.8727	3.37692	4.68271	3.96706	4.20543	3.59493	4.30637	4.86068	3.67525	4.22791	4.52675	3.45801	4.98919	4.69454	3.81442	7.5838	6.74118	6.58004	4.67671	8.04349
Os02g0461800	Hypothetical protein.	No Hit	8.14627	8.66498	8.69683	8.04811	8.42548	8.34289	7.5875	8.7191	8.9308	7.42379	8.08162	8.47593	8.34172	8.97664	9.01074	7.91392	8.69827	9.23987	5.67494	6.18097	6.88677	5.71567	6.2925	6.68022	6.53595	6.2358	6.07647	6.79704	7.56943	6.62639	5.87715	5.91541	7.16647	6.09196	5.65989	6.52246	10.8144	8.07679	7.16905	7.88289	7.98928	6.8589	7.45872	6.62466	6.8137	7.30276	6.76738
Os02g0462800	WRKY transcription factor 42 (Transcription factor WRKY02).	OsWRKY42 - Superfamily of TFs having WRKY and zinc finger domains, expressed	4.78961	5.22972	6.28524	5.1398	5.46816	5.64114	4.81872	4.95904	5.45043	4.54437	5.05898	5.94219	6.10546	6.17101	5.52306	6.73203	6.15958	6.4405	6.08253	6.47803	5.91032	6.3843	5.99725	4.90212	5.25977	5.316	5.05348	5.27967	4.90991	5.11443	4.67621	5.37411	5.77233	4.54316	5.16474	5.16077	7.07346	5.9361	6.1728	5.45149	5.74828	5.36446	6.07397	5.62762	5.27014	5.9322	5.16781
Os02g0507100	Conserved hypothetical protein.	expressed protein	3.89784	4.72543	5.2394	2.47533	2.58822	2.59847	3.08752	3.58458	2.93446	2.38615	1.58847	2.16306	1.94618	-0.10965	2.27628	1.63864	1.39261	1.62592	8.49669	8.39274	8.35818	9.28882	8.86871	9.21992	5.1031	4.6037	6.48973	3.87039	3.36927	4.72065	5.48099	5.84914	6.63172	5.72166	5.71908	6.0072	4.14612	4.22049	5.97449	4.6623	5.02279	5.33738	9.32818	9.63074	10.1113	8.51737	9.2233
Os02g0518800	Hypothetical protein.	expressed protein	4.91379	5.02334	3.97804	5.09404	5.10174	4.18446	5.78378	5.39679	4.98813	5.46683	4.97845	4.47362	4.89152	4.57801	5.31535	4.28862	5.14832	4.49067	3.53781	4.08877	4.65201	4.06653	4.54431	4.1896	3.17689	1.76646	0.897325	3.50614	4.06923	4.83504	5.15285	5.09299	4.22843	5.0315	5.6292	5.24186	5.09904	5.51474	4.8226	4.23613	5.08431	4.92671	5.67501	6.26362	5.38331	5.34693	5.83703
Os02g0530500	Conserved hypothetical protein.	conserved hypothetical protein	3.69943	3.97826	4.76153	2.84523	2.56112	4.26296	2.43211	1.87464	3.26342	1.60834	1.52223	3.21908	3.45817	2.96542	3.14578	2.33133	1.85508	1.79688	8.8701	7.85709	8.08397	8.34356	8.66303	8.19005	4.92059	4.37065	5.23823	4.15386	3.53504	5.55916	5.11035	4.50414	4.852	5.4128	5.07668	3.4817	4.47093	4.15844	3.17094	3.24287	3.88687	3.58988	9.02561	6.69692	6.86143	3.89761	7.06453
Os02g0537100	Pectinesterase inhibitor domain containing protein.	pectinesterase inhibitor domain containing protein, putative	5.6549	5.72214	6.33037	6.23473	6.04805	6.26709	5.91802	5.30511	5.57844	6.4275	6.03742	6.78521	5.49712	6.00698	5.41766	5.88482	5.76467	5.50616	6.69235	6.52516	7.16476	6.35135	6.785	6.98564	7.26067	7.72138	7.07109	9.1913	7.50164	6.33734	7.85121	7.50871	8.00051	8.07855	7.12676	7.60736	8.22321	8.02582	8.58119	8.14244	7.62124	8.42909	6.70355	6.65509	6.10732	7.68845	6.84725
Os02g0543000	Abscisic stress ripening protein 1.	abscisic stress-ripening, putative, expressed	13.0029	13.1495	13.243	13.0116	13.5751	13.5855	12.8817	13.4427	13.4137	13.2532	13.8126	13.934	13.1897	13.3853	12.7206	14.2979	14.458	13.5129	13.3973	13.8838	13.2353	14.3	13.094	13.1905	14.9248	14.5689	14.6561	15.2423	14.7953	13.9008	14.126	14.4851	15.203	14.0551	14.3312	15.1665	13.6504	13.6252	14.7213	13.6221	13.8737	15.1042	10.8329	12.7733	13.6046	14.749	13.7649
Os02g0555300	No apical meristem (NAM) protein domain containing protein.	no apical meristem protein, putative, expressed	2.47568	4.11687	3.21566	2.52652	3.5643	4.09583	6.57053	6.49053	3.81398	7.2933	6.82151	7.3476	6.63716	7.61177	7.59368	9.32789	9.1439	10.2164	6.54629	4.75859	4.56474	6.63981	6.67328	6.1063	4.79044	5.72506	5.19288	7.59735	5.85218	5.85695	7.99751	7.8319	7.9763	7.94116	7.48006	7.71872	8.43341	8.42729	9.1865	9.41663	9.88684	8.94874	11.3325	9.41385	9.17125	7.07954	10.1462
Os02g0559800	Zn-finger, RING domain containing protein.	RING-H2 finger protein ATL3F, putative, expressed	5.97561	6.10275	10.1384	7.07061	6.15191	7.3057	9.66733	9.01542	9.02241	10.2922	10.5506	10.3477	10.5768	8.94662	8.68558	10.765	9.78049	9.85661	11.2525	10.9976	11.3666	8.1864	6.49499	7.42229	10.0926	9.74982	9.66516	10.8141	10.4492	9.43164	9.97224	10.0985	11.7099	10.0902	9.88352	10.3095	10.7013	10.614	12.6313	10.6622	9.99274	11.081	9.59042	7.5097	7.0214	10.2742	6.20277
Os02g0560600	(No Hit)	No Hit	5.86266	6.10933	9.27748	6.86154	6.64225	7.49467	8.36381	8.21373	8.2085	9.25022	9.7819	10.0185	10.0716	9.24989	9.49221	10.0365	9.08284	9.63946	10.0864	9.69963	10.3509	7.53295	6.26656	7.11122	9.04577	8.94677	7.9437	9.8859	9.90783	8.53901	8.43104	8.73462	10.6838	8.54012	8.84442	9.31726	10.5015	9.7003	11.4903	9.72341	9.02603	9.89529	8.66917	6.60674	6.62692	9.23711	6.28091
Os02g0561400	(No Hit)	No Hit	5.44471	6.11401	9.36359	7.02707	6.52441	7.58184	8.38329	8.43859	8.37554	9.04718	9.77454	10.0883	10.1798	9.25324	9.57315	10.099	8.93306	9.70688	10.2181	9.70816	10.3954	7.49706	6.34106	7.16757	9.19328	8.87722	8.05903	9.99004	9.97187	8.5408	8.5197	8.82878	10.8156	8.65708	8.86035	9.4082	10.5843	9.81859	11.6203	9.74745	9.09825	9.9916	8.70206	6.7028	6.92183	9.18627	6.25911
Os02g0561900	(No Hit)	RING-H2 finger protein ATL4O precursor, putative	5.66166	6.15886	9.3259	6.99282	6.71972	7.52387	8.48431	8.30199	8.32726	9.25832	9.86458	10.0787	10.2186	9.30534	9.56903	10.1285	9.0722	9.7265	10.1445	9.8694	10.4322	7.63748	6.34216	7.26368	9.20573	8.85527	8.10946	9.94325	10.0403	8.62039	8.54496	8.87722	10.8227	8.73332	8.92492	9.45809	10.6121	9.77452	11.6471	9.73505	9.23135	10.0648	8.78189	6.78636	6.7924	9.34258	6.3804
Os02g0579300	Myb, DNA-binding domain containing protein.	MYB family transcription factor, putative, expressed	8.03691	8.65743	9.99668	6.29759	6.14436	7.76675	6.82453	7.70429	8.74012	4.76937	5.58711	7.28958	8.13267	9.09835	10.4757	5.50192	5.69284	7.65187	11.7024	10.3102	11.1125	11.467	11.5507	11.8527	7.91611	8.53797	6.90296	6.52128	5.90054	6.82227	7.19884	7.26875	8.70913	6.72234	6.87329	8.36038	8.9427	7.46767	8.22006	7.61872	7.33511	7.33996	11.5108	11.5525	12.1373	9.01661	11.8043
Os02g0611300	Nuclear protein SET domain containing protein.	SET domain containing protein	7.4385	7.27709	7.32423	7.59042	7.65854	7.57933	7.46057	7.09653	7.36317	7.0306	7.15527	6.7404	7.47939	7.34829	7.19613	7.09773	7.40626	7.07514	7.81254	7.57272	8.51066	8.4911	8.63042	8.75072	7.21089	6.88125	7.14678	6.43593	6.23626	6.80113	7.83754	7.65784	8.15237	8.08046	7.56729	7.91671	7.24682	6.85532	7.38299	6.9043	6.84212	7.43235	8.97298	8.70212	9.17504	8.10948	8.95633
Os02g0613900	Adenine phosphoribosyltransferase 2 (EC 2.4.2.7) (APRT).	phosphoribosyl transferase, putative, expressed	9.14996	9.26661	9.68146	6.56456	6.75432	7.54392	9.07352	8.95798	8.51473	9.34312	10.3495	9.97916	4.95213	5.499	5.74871	4.79006	4.61582	4.16195	11.9838	11.37	10.5298	11.4424	10.8896	11.2532	5.29973	5.93233	7.38846	7.91388	10.7403	7.90028	8.27159	8.71493	7.92454	8.52427	8.59812	8.4763	7.04476	7.02336	6.37903	7.5534	7.75653	8.51212	11.6808	10.3306	10.5408	12.2321	12.2807
Os02g0616100	Leucine-rich repeat, plant specific containing protein.	uncharacterized protein At4g06744 precursor, putative, expressed	4.5051	2.48273	7.51481	1.14416	0.97872	4.93943	2.38673	1.60741	2.16935	2.75373	0.96474	3.96224	2.28951	2.57688	1.19409	2.14796	1.91277	1.43313	16.1681	12.6858	17.1034	15.1495	16.0196	16.8192	2.30844	5.46108	4.31879	1.41174	2.4526	3.30575	3.80544	6.20813	5.89584	4.6992	5.0833	4.21677	4.30763	2.16015	3.90857	3.66842	4.99631	2.62277	14.2423	16.4257	17.0576	15.1384	15.9246
Os02g0619600	von Willebrand factor, type A domain containing protein.	zinc finger family protein, putative, expressed	7.55944	7.55196	8.58371	7.10743	7.38205	7.74045	6.63798	7.03548	7.11502	5.37173	5.06298	5.32403	6.80386	7.58234	7.76074	6.30294	6.58009	7.56965	9.22074	8.27479	9.03411	9.20477	9.37608	9.6993	3.50271	5.31329	3.16303	5.40955	4.447	4.75521	8.15378	8.45644	8.67154	8.18268	8.36347	8.51007	7.83458	7.16718	8.19576	7.492	6.94682	7.42478	10.1187	9.72118	9.92112	8.86178	9.79805
Os02g0631700	ZmRR2 protein (Response regulator 2).	response regulator receiver domain containing protein, expressed	3.52473	3.62977	3.69181	3.27182	3.34748	0.862585	5.48145	4.91691	4.63849	3.51483	3.27813	3.68838	4.49485	4.98531	5.00218	4.0514	4.0178	4.14798	8.06647	6.6296	5.93072	7.86765	7.82773	8.18352	5.50195	5.0318	5.1563	3.97926	4.61066	3.8424	4.13645	4.91633	1.21752	3.15858	5.76598	3.64903	5.15199	5.89345	3.80635	4.01814	5.14537	3.16305	6.36448	7.69953	7.00142	3.9901	6.82879
Os02g0633300	EspB-like protein.	transposon protein, putative, unclassified, expressed	10.8232	11.0393	10.6651	9.23752	9.6401	9.87388	11.6834	12.2742	11.8652	10.8757	11.3637	10.3147	11.5812	12.1757	12.1281	11.6943	12.1194	11.9355	10.2547	10.369	10.8858	10.5632	11.1968	11.4003	10.8439	10.3694	10.8938	11.6383	12.1018	11.2446	11.4335	11.2391	11.9537	11.2853	10.5511	11.2617	10.6967	10.7591	11.8101	11.0498	10.8819	11.4623	9.4478	11.0796	10.6188	11.6593	10.2685
Os02g0639500	Major pollen allergen Lol pI family protein.	expansin precursor, putative, expressed	0.253538	1.54713	2.49091	2.5077	2.62331	2.8223	-0.71265	1.19317	1.32085	2.40849	1.16129	0.287449	2.62817	2.63968	1.12037	0.996044	1.59306	1.23449	10.0575	8.5058	10.2063	10.3422	11.1115	10.7694	1.61557	-2.61875	4.1504	2.49197	1.84824	3.42065	9.43712	8.737	9.02496	9.78276	9.08187	8.5062	5.95226	6.46019	7.58084	6.60161	7.15381	7.35676	9.26357	10.3654	10.1172	6.02639	10.4847
Os02g0643200	YABBY protein family protein.	YABBY domain containing protein, putative, expressed	4.2991	2.54809	4.40122	3.95205	3.92402	4.89631	3.21934	3.95027	2.28249	4.09325	2.03866	3.91255	2.71194	3.6188	4.10505	2.93568	2.96719	3.62442	8.19322	7.55183	3.89964	7.63538	8.07619	8.95288	4.11015	5.76783	4.67515	3.19449	3.83893	2.8741	4.7595	4.99017	3.99919	4.50667	5.67071	5.06674	5.3169	5.05382	3.8746	4.91565	4.75408	4.0099	6.57687	4.60249	5.0919	3.92975	5.19908
Os02g0643800	Auxin responsive SAUR protein family protein.	OsSAUR11 - Auxin-responsive SAUR gene family member, expressed	6.73989	7.05928	7.53165	5.12134	5.36247	6.21639	6.8386	7.11874	7.06918	5.42594	5.90771	5.92204	7.31284	7.33268	7.11327	6.08598	5.85574	6.12698	7.92324	9.25931	8.4508	6.2372	5.53596	5.42566	9.61694	9.5584	9.01759	9.01574	8.14732	7.81325	6.46562	6.52867	6.60072	6.99621	7.75426	7.84135	6.73876	6.73041	7.22754	8.38474	8.50505	7.45068	6.37709	4.88781	3.83384	5.1906	4.29197
Os02g0653900	Lipase, class 3 family protein.	triacylglycerol lipase like protein, putative, expressed	12.2963	11.7823	12.8528	11.626	11.2405	11.7038	12.8874	12.799	12.8003	12.1272	11.9595	11.9967	12.5241	12.1506	11.9597	12.3515	11.7346	12.4076	11.5225	12.2226	13.0443	12.4084	11.8561	12.1092	12.1008	11.7868	11.0741	13.295	13.0248	12.3139	11.4866	11.1982	11.4851	12.0981	11.8551	12.222	11.1001	11.0702	11.4347	11.9828	11.1795	11.141	10.1047	10.0748	9.4309	10.3045	9.93531
Os02g0656100	Conserved hypothetical protein.	expressed protein	8.48147	6.77179	9.52232	6.63384	7.03035	8.63513	2.79756	3.57587	3.38915	1.17769	3.75844	1.77891	3.64465	3.53114	2.50958	4.1886	2.85772	1.41197	10.8819	9.08096	10.593	10.5811	11.4539	11.0344	-0.780966	9.02103	4.0091	1.06413	2.34598	3.02762	8.62407	8.70613	8.76402	8.91298	8.94063	8.28091	7.26427	6.60862	7.25138	7.20247	7.40305	6.99872	11.4655	11.8907	11.9168	11.3971	11.7585
Os02g0657000	AP2 domain-containing protein Rap211.	AP2 domain containing protein, expressed	8.94126	9.10559	9.79772	7.86449	7.84506	8.55126	6.02676	6.12291	6.40347	4.73412	5.10567	6.09204	6.06052	6.08001	5.73013	3.99297	3.98595	3.6623	10.8906	9.95911	12.0604	10.6892	11.7361	11.4794	6.01171	5.95703	6.41728	4.90611	5.92865	7.17841	9.97593	10.3569	10.6714	10.99	10.9156	11.1115	9.63223	9.14112	9.743	8.75107	8.88739	9.63414	12.224	12.2814	12.16	13.8804	12.6589
Os02g0667300	Conserved hypothetical protein.	expressed protein	5.74462	5.83896	5.82024	4.47948	5.3254	5.13324	6.12983	6.08909	5.86204	6.18665	6.57457	6.90082	4.28299	3.45206	3.06125	3.50472	2.521	1.0558	8.85738	9.39255	8.90128	9.02509	8.75735	8.87405	9.59493	9.56622	9.95593	10.0281	9.82355	10.332	7.26265	7.49963	8.67718	7.7502	7.60254	7.49857	5.25271	5.44968	7.00345	5.70883	5.98364	7.2978	9.44132	9.84735	10.1577	9.17308	9.09283
Os02g0669500	Conserved hypothetical protein.	expressed protein	9.2687	9.56703	9.47072	9.27885	9.02686	8.95009	9.90799	10.151	9.78053	10.4537	9.93944	9.79594	11.0424	10.9101	10.4097	10.9046	10.1416	10.537	9.44448	11.573	11.3911	8.98005	8.0743	8.07607	10.0313	9.57622	9.59281	10.3173	9.57774	8.45686	11.3343	10.8746	11	10.6095	10.8449	11.1702	10.5573	10.5467	11.0086	10.6573	10.256	10.3507	11.461	8.92711	8.6612	8.37534	8.90963
Os02g0671800	Hypothetical protein.	retrotransposon protein, putative, unclassified, expressed	3.27517	2.20209	3.16562	3.00612	2.87662	0.646321	3.40567	3.17481	3.72349	3.1663	3.62756	1.67202	4.33664	4.00853	3.74015	2.51863	3.92173	4.69654	5.17344	5.15531	5.74395	3.62476	4.05992	4.20791	5.88851	6.1021	6.36177	5.52589	5.50049	5.01085	4.95052	4.78085	5.15032	3.69503	4.73845	3.80177	4.80031	3.91085	4.89843	3.88461	4.14812	4.39554	6.86102	5.03805	4.52084	4.69616	5.1048
Os02g0675700	Putative methyltransferase DUF248 family protein.	dehydration response related protein, putative, expressed	9.02728	8.74583	9.91417	7.47163	7.394	9.22832	8.17654	8.44186	8.83928	7.5061	7.36817	7.64487	8.16019	8.26375	7.99346	6.9566	6.79287	7.62702	11.8843	10.6938	11.6644	12.1702	12.7327	12.3663	5.49748	6.08361	4.98177	5.33857	6.02751	6.18918	11.4343	11.01	10.9778	10.713	10.6616	10.2025	8.43938	8.53718	9.2839	9.15497	8.96144	9.88943	11.5203	12.001	12.1244	12.123	11.9945
Os02g0681200	Zn-finger, RING domain containing protein.	zinc finger, C3HC4 type domain containing protein, expressed	9.85746	10.5728	10.359	9.33906	9.25554	9.16018	10.7993	11.1361	10.719	10.493	10.936	10.4921	10.1425	9.98328	9.58255	10.2612	9.88326	10.196	9.52692	11.4745	10.8726	10.0849	8.93288	9.25849	11.746	11.3881	11.4844	10.9309	11.3075	11.3098	9.99241	9.85059	10.7394	10.4044	10.4075	10.5731	10.4467	10.0612	10.9992	10.1933	10.0735	10.7426	9.22946	7.67856	7.27729	9.04612	6.74054
Os02g0688500	ALG6, ALG8 glycosyltransferase family protein.	glucosyltransferase, putative, expressed	7.59845	8.04422	7.43618	8.42807	8.60074	7.7224	8.76429	8.94152	8.80454	9.56186	9.481	8.81683	9.37813	9.11545	8.98666	9.13549	9.48867	9.58907	9.48062	9.33474	9.53891	10.1075	10.2495	10.459	8.36838	7.75696	7.98744	8.94835	9.26176	8.3323	9.88284	9.96618	10.1421	9.92369	9.64479	9.60238	9.22828	9.09582	9.65375	9.35534	9.22538	9.72465	10.961	10.9094	10.9171	11.2133	11.4207
Os02g0688800	Zn-finger, RING domain containing protein.	RING-H2 finger protein ATL3J, putative, expressed	5.52502	5.04426	5.31658	6.19055	5.54623	5.85826	5.1481	5.34184	5.94003	5.20668	4.49703	5.20275	5.62469	5.74363	5.77122	5.65074	5.63224	6.48314	4.77876	4.70596	3.40808	5.39384	4.99383	5.11918	5.11292	5.73246	4.3506	5.1751	4.39366	4.39743	4.75968	5.15997	4.53744	4.93247	5.69886	4.47738	4.86064	5.2492	4.35254	4.34688	5.00659	4.49423	5.39578	4.53549	5.47937	3.65801	4.79146
Os02g0690000	Conserved hypothetical protein.	expressed protein	4.4273	5.03877	3.44493	7.56808	8.16132	6.38594	5.99545	6.69655	6.11456	8.52384	8.96882	8.29938	5.82417	6.50748	6.35203	8.30979	8.68549	8.72419	9.70439	8.2851	9.56805	9.31936	9.72831	9.01527	7.12345	6.43637	8.15786	9.39609	8.94503	8.1452	6.47828	6.80504	6.66851	5.94946	6.15919	7.10411	7.11011	7.7855	8.17538	9.02032	8.874	7.93165	10.4516	9.05364	8.95521	9.88728	10.2556
Os02g0695600	Conserved hypothetical protein.	expressed protein	9.18622	8.92918	10.2387	8.88539	9.02236	10.6304	6.89571	6.60205	5.85869	8.80476	9.10868	8.89642	3.76967	4.84383	4.26545	6.05241	6.54564	8.31504	11.2334	9.91061	10.6687	10.7507	10.8615	11.2773	6.37462	6.85148	8.33366	9.5255	9.56482	9.52709	8.9895	9.07334	9.13011	9.25435	9.28577	9.33792	6.8444	7.54316	8.68133	8.78771	8.68064	8.50768	11.2896	11.1988	11.5046	13.0525	12.2506
Os02g0712400	AP2 domain containing protein RAP2.9 (Fragment).	expressed protein	8.79814	9.13144	8.55029	8.94517	9.18659	8.628	9.17036	9.53758	9.39246	9.77821	10.295	10.1154	8.95254	9.61238	9.50624	8.90028	9.41174	9.17536	10.0407	10.2089	9.40782	10.4675	10.0802	10.1039	9.6018	8.26559	9.24701	10.6676	10.9247	10.6969	9.52291	9.64223	9.91581	9.6881	9.58635	9.88679	9.10408	9.28822	9.7172	9.4637	9.95107	9.81926	10.8994	10.4213	10.4618	10.3787	10.5441
Os02g0719000	RHO protein GDP dissociation inhibitor family protein.	rho GDP-dissociation inhibitor 1, putative, expressed	0.650819	0.458436	3.86384	1.8715	2.86525	4.72984	0.972915	1.8671	1.08535	1.93401	1.67146	2.36479	1.5252	-0.553559	1.20436	1.11755	0.933971	2.8117	12.3473	11.5143	11.5567	12.7147	12.441	12.1994	3.60585	5.44338	5.67351	3.84542	4.80103	5.77647	9.81727	10.154	10.4879	9.80447	9.85596	9.26693	8.04637	7.804	9.08291	7.99029	8.69709	8.54126	13.6127	12.9816	13.2137	8.63954	12.8254
Os02g0721700	Conserved hypothetical protein.	GPI-anchored protein, putative, expressed	12.462	12.4376	12.971	11.4591	11.8478	11.9026	10.1638	9.97619	10.1966	9.7934	9.82639	9.89005	10.7083	10.6296	10.8509	9.52115	9.67417	9.88929	12.3471	12.0543	12.5608	12.5737	12.5448	13.0329	11.1698	11.0924	10.7677	11.2385	11.0855	11.3182	11.9954	11.9596	13.0107	11.9798	11.7456	12.2281	10.8623	11.0543	11.8007	11.5281	11.2205	11.6474	12.5063	12.8757	13.1305	11.2185	12.4558
Os02g0725000	Protein kinase G11A (EC 2.7.1.-) (Fragment).	AGC_PVPK_like_kin82y	11.1978	11.1994	11.2395	9.04965	9.14908	10.1282	10.2247	10.2683	9.98677	5.16771	5.85811	6.38052	9.17454	9.16083	8.95962	6.11588	6.25498	5.87506	10.2548	10.1839	10.529	10.3761	10.516	10.4541	8.3749	7.54182	8.06737	7.14574	7.99836	8.13796	10.4176	10.3387	10.5659	10.3201	9.79218	9.81333	9.3105	9.40024	9.81648	9.34589	9.16929	9.97638	10.9539	11.4024	11.2119	10.2367	11.0866
Os02g0726300	Dof zinc finger protein.	dof zinc finger domain containing protein, putative, expressed	13.0761	12.8227	13.2968	11.549	11.7312	12.6293	12.6785	12.6891	12.889	13.0378	13.5916	13.1446	11.5356	12.3537	12.0713	11.0715	11.5311	12.0555	11.4337	11.7706	11.2422	10.5566	10.3637	10.4334	11.8462	11.352	12.0772	10.8357	12.1176	12.4021	10.1699	10.4937	10.6937	9.39338	9.66457	9.10336	9.39985	9.51878	10.7924	9.03385	9.32967	9.06528	10.6819	11.096	11.0606	13.2598	11.0283
Os02g0739400	Avr9/Cf-9 rapidly elicited protein 231 precursor.	glycosyl transferase 8 domain containing protein, putative, expressed	11.3134	11.091	12.6307	10.1644	10.3721	11.4401	9.53475	9.41382	9.15962	9.58831	9.41023	9.80394	9.92358	10.089	9.84899	9.75022	9.92838	9.86049	12.8478	12.0528	13.2291	11.5628	12.4138	12.3192	9.35051	9.34915	9.56056	10.5253	10.3592	10.1369	14.0055	13.8207	14.2234	13.8685	13.7652	13.6014	12.3428	12.3897	13.2744	12.6776	12.4587	12.869	11.4021	12.998	13.0796	13.4799	12.5889
Os02g0753900	Conserved hypothetical protein.	expressed protein	4.39516	4.80237	4.73872	4.93536	4.59812	5.0641	4.49609	4.37657	4.25236	3.97124	4.33777	5.04419	2.36457	2.99304	2.59012	3.61061	2.94641	3.42809	5.32765	6.20635	6.41533	5.09305	5.29907	5.90044	6.20168	5.93092	6.74987	4.84312	6.84159	7.01664	4.23109	4.56208	5.51434	4.16757	4.64066	4.49131	2.99518	4.03216	3.30118	3.1132	3.8722	4.0961	3.7001	5.75876	4.61522	8.86316	5.24586
Os02g0755000	Putative methyltransferase DUF248 family protein.	dehydration response related protein, putative, expressed	7.83776	7.34894	8.23462	9.11952	8.44387	8.90108	8.57408	7.88541	7.5573	9.01439	9.09343	8.06602	5.91886	6.05671	5.95316	7.0177	6.84927	7.37451	10.4825	9.5376	10.8588	10.3253	10.9449	11.3424	7.79187	8.16406	8.52393	8.20789	9.04948	8.54506	10.4711	9.91304	10.4758	10.6703	9.69043	10.0516	9.26645	9.30422	10.1837	9.76507	9.69009	9.65951	10.4233	11.5447	11.4608	10.8545	11.4737
Os02g0756100	Conserved hypothetical protein.	expressed protein	6.16268	5.73267	5.44093	5.80705	5.85675	5.6835	6.68523	6.21227	6.49187	7.85572	8.14984	7.6269	4.76707	4.92608	4.13708	5.98893	6.34561	5.89734	10.4738	10.1084	8.25289	11.4288	11.2804	11.3743	6.27559	6.09029	7.09967	7.66509	8.55501	8.22188	5.97125	6.28455	5.40918	6.0645	6.85061	5.32338	5.58919	6.33815	4.29065	4.64484	6.33475	4.63306	12.1454	10.7823	10.7446	8.59606	11.798
Os02g0759000	Conserved hypothetical protein.	helix-loop-helix DNA-binding protein, putative, expressed	6.48194	6.38438	6.92671	6.50162	6.86185	7.58417	6.38976	6.42484	6.26107	4.02161	4.64193	5.86578	6.52805	6.92215	6.95617	6.46131	6.22815	5.93325	7.94383	7.89035	7.08126	7.04398	6.78244	7.83163	6.05321	6.9436	6.00827	8.21811	7.50595	8.67398	9.01582	9.29094	9.93366	9.20669	8.77923	9.17175	7.12739	7.43236	8.88166	7.68417	7.71041	9.21128	7.69012	8.17633	8.22002	7.83553	8.04159
Os02g0767000	Remorin, C-terminal region domain containing protein.	remorin C-terminal domain containing protein, putative, expressed	8.82282	8.56169	8.58098	8.81265	8.79179	8.83916	9.19915	8.96788	8.85693	8.84928	8.81346	8.89448	8.77756	8.87539	8.49949	9.01228	9.02236	8.33587	11.1309	10.3538	10.138	11.5212	11.4911	11.4481	8.35421	8.37596	8.03773	8.53156	9.104	9.55527	10.1647	9.78254	9.91501	10.4023	9.66654	9.42587	7.44809	7.68866	8.468	7.64708	8.12529	8.93157	12.3536	12.0697	12.1542	10.4178	12.3285
Os02g0773400	Ion transport protein family protein.	cyclic nucleotide-gated ion channel, putative, expressed	8.2478	8.1877	8.1075	8.22909	8.12116	7.99395	8.21545	7.64498	7.35494	8.06012	8.01516	7.05629	6.99745	7.33296	7.33343	7.18317	7.37429	7.41854	8.48733	8.42017	7.6549	8.89502	8.73176	8.93889	6.63862	6.5365	6.70348	7.85611	8.1322	7.2927	7.1412	6.79741	6.938	7.56414	6.8551	7.09958	5.04421	5.28287	5.60955	6.93675	6.57005	6.97243	10.6684	9.56933	9.5299	9.93415	10.6998
Os02g0786500	Pathogenesis-related protein 1 precursor (PR-1).	SCP-like extracellular protein	3.35628	2.31758	3.30793	2.36177	2.0052	1.88645	2.03376	2.59245	1.68113	2.50361	2.50955	3.0005	3.40524	1.83395	3.42375	3.428	2.36904	2.6519	8.31119	7.46804	7.06742	8.39567	8.14905	8.28713	4.02257	3.8191	4.41053	3.25563	2.11952	4.09391	8.58207	8.19121	9.40274	8.84066	8.99316	8.86339	6.1008	6.5011	7.97099	7.15275	7.0688	8.05696	7.73086	8.01546	8.22028	6.04588	7.83699
Os02g0787800	Diacylglycerol kinase, catalytic region domain containing protein.	diacylglycerol kinase, putative, expressed	10.5229	10.4263	10.5106	10.298	10.4141	10.1611	10.3678	10.2048	10.1865	10.3108	10.361	10.0581	10.1321	10.0161	9.88941	10.0982	10.2849	10.3115	9.7604	9.92184	10.3047	9.96924	10.2616	10.3875	9.56321	9.15584	9.63315	10.0102	9.99266	9.6055	9.21602	9.01412	9.39075	9.36134	8.98593	9.34543	8.90417	8.92263	9.33559	9.10802	8.96246	9.53158	10.3194	10.4156	10.5464	9.94933	10.4485
Os02g0792100	Non-protein coding transcript, putative npRNA.	No Hit	7.57833	7.5754	7.90886	8.8174	8.76935	8.64084	8.50731	8.50755	8.53657	9.51547	9.1122	9.79059	8.47181	8.16596	8.31706	9.25185	9.17644	9.38204	8.57236	8.49156	8.68099	8.92755	8.8516	9.02239	9.08461	9.11389	8.99525	10.183	9.24724	9.59514	8.99702	8.58773	9.36393	9.21625	8.40105	8.99184	10.5022	9.30059	9.70244	9.93408	9.42919	10.1759	9.93058	9.23879	9.80879	8.84706	9.86287
Os02g0805000	Adaptin, N-terminal domain containing protein.	AP-1 complex subunit gamma-1, putative, expressed	8.82749	9.00955	8.73228	9.28001	9.38992	8.68763	9.52518	9.36938	9.35987	9.55212	9.61712	8.94053	9.74687	9.30055	9.21796	9.21378	9.56277	9.06676	10.5907	10.346	11.3536	10.4978	11.2922	11.4024	9.03976	8.93713	9.30955	9.37621	9.2933	9.36202	11.0386	10.696	11.3865	11.1203	10.2184	10.4787	9.63027	9.39126	10.5807	9.42594	9.68973	10.5529	11.8655	12.6887	12.6454	11.3663	12.206
Os02g0811000	Ribulose bisphosphate carboxylase, large chain family protein.	DUF640 domain containing protein, putative, expressed	2.45952	2.48447	2.46127	2.34335	2.61245	0.194738	2.01497	2.28759	3.39365	2.36035	2.47453	2.75675	2.7049	0.858938	2.90888	3.05352	2.77114	2.31558	8.35587	9.21762	7.11933	9.06821	8.31671	8.67615	8.20701	8.15376	8.97932	9.15789	8.63529	8.55548	2.27514	2.27668	1.05539	2.27333	3.45989	2.2323	4.28489	2.98163	1.85008	3.3664	3.01604	2.20505	2.90942	1.64202	2.24296	1.9991	2.46639
Os02g0818500	Conserved hypothetical protein.	pib, putative, expressed	2.74672	2.68016	4.90769	4.9375	4.55555	4.76546	4.99078	4.69107	4.0265	5.56251	5.78426	5.82538	4.02874	4.19367	4.15632	4.25433	5.54759	5.3526	5.27771	4.08445	6.5624	6.77463	8.17653	8.07455	3.6285	-1.96752	5.67639	4.19638	5.01241	4.19117	5.60473	5.22845	6.06305	6.57465	5.24459	5.83675	5.6424	5.27106	6.4408	5.20286	5.42887	6.61391	6.62694	7.60247	6.9676	7.07086	7.75895
Os02g0820400	Transferase family protein.	transferase family protein, putative, expressed	9.90489	9.71652	10.2023	8.34798	8.38075	8.72327	10.165	10.4052	10.5136	8.53185	8.49416	8.70344	10.6041	10.7394	10.6183	9.47427	9.15525	10.1101	10.7477	10.4201	10.8198	9.94061	10.2597	10.3139	10.6843	10.6202	10.0474	10.4691	9.69236	9.46207	11.0691	10.7657	11.3798	11.1455	10.7097	10.8881	9.95076	9.95717	10.9084	9.34886	9.88796	10.7151	10.1463	11.6735	11.7153	10.5731	10.8763
Os02g0829000	Non-protein coding transcript, uncharacterized transcript.	expressed protein	5.85429	5.21668	7.55525	4.77553	4.4864	8.07125	5.1398	4.8175	5.36863	4.37208	4.67617	4.9106	3.87831	4.15251	3.80512	3.96973	3.47213	4.17294	6.87555	4.76853	7.84096	7.07719	8.63267	8.81071	6.50577	4.26121	7.22555	4.9172	5.03468	5.59905	3.90047	3.25434	5.19596	5.87208	4.29731	5.43175	6.00126	4.8192	5.7096	5.32472	4.75048	6.50721	6.74682	9.90638	10.2684	9.64177	10.2583
Os02g0830700	Leucine-rich repeat, plant specific containing protein.	inactive receptor kinase At2g26730 precursor, putative, expressed	3.91894	3.77181	4.03702	4.38214	4.56106	4.21312	5.31007	4.88032	5.14463	4.48476	4.28257	4.36003	2.3202	3.62643	2.72374	1.54737	2.71815	4.0441	11.2541	10.8716	11.0968	11.9424	12.0017	11.7856	4.37158	-0.73413	4.81482	3.61647	3.67056	4.3067	10.0641	9.85766	9.85909	9.97801	9.70977	8.95823	7.50045	7.2415	8.30195	6.05329	8.27797	8.91987	12.5162	12.0447	12.072	7.14832	11.7943
Os03g0107700	EL2 protein.	expressed protein	5.72956	6.11481	7.21837	7.53634	7.26724	7.24364	7.72108	7.38378	7.3871	9.42368	9.18159	8.91855	7.84898	7.38419	6.96111	8.18294	8.46435	8.98075	7.47443	8.84215	8.59517	8.4562	7.60142	7.83668	8.40186	7.96612	9.55217	9.70773	9.50298	9.25788	8.66985	8.78245	9.03832	8.90309	8.72441	8.81093	8.03919	8.51473	9.58041	9.56054	8.84973	8.85638	9.01104	6.89328	7.28233	9.57123	7.64522
Os03g0114800	Protein of unknown function DUF791 family protein.	major facilitator superfamily domain-containing protein 5, putative, expressed	8.02985	7.32846	8.84179	10.5507	9.93299	10.2708	9.02503	8.48735	8.47075	10.8517	10.7017	9.80371	8.30903	7.95859	7.89189	9.44731	9.49015	9.66271	11.9698	10.6687	12.1329	11.7588	12.3231	12.7297	8.90136	8.94556	8.95675	10.8011	10.7265	9.93603	11.2051	10.6919	10.8508	11.3278	10.4712	10.7839	9.99884	10.0205	10.7719	11.1661	10.9032	10.3607	11.791	13.323	13.1338	11.6514	12.9353
Os03g0127200	NAM protein.	no apical meristem protein, putative, expressed	1.57441	1.7502	3.80591	3.15016	2.26407	2.27189	2.69986	1.25971	2.56391	1.02285	2.47491	3.44253	2.1381	3.0219	1.8739	-0.522606	0.59825	2.02051	4.50796	3.42316	4.18458	4.02403	4.41275	4.22721	3.03366	-0.990767	5.64707	1.4437	2.83004	3.55299	4.17606	4.48381	4.38544	4.45975	5.00815	4.56237	4.17805	3.9324	4.30356	4.14866	4.19809	3.78998	5.22999	5.26522	6.27257	3.96038	5.4207
Os03g0127700	Protein kinase domain containing protein.	leucine-rich repeat transmembrane protein kinase, putative, expressed	3.10228	1.61499	2.88745	3.05761	2.44797	3.27245	1.83272	1.70969	2.13699	2.45036	1.01085	2.19166	2.69178	2.27881	2.4179	1.25599	3.85628	3.06793	8.79465	8.12691	8.68915	9.44095	9.68822	9.33339	1.77892	4.32743	4.41213	2.3283	2.18174	4.30167	9.70037	9.39122	9.90484	9.79477	9.26361	9.06303	7.12079	7.38867	8.54504	8.03386	7.83497	8.62575	9.67952	9.85155	10.1681	7.26011	9.68311
Os03g0137200	Protein phosphatase 2C-like domain containing protein.	protein phosphatase 2C, putative, expressed	9.09245	9.02553	9.16845	10.4395	10.5663	10.4019	9.66291	9.92351	9.67011	11.1298	11.0447	11.1911	9.44648	9.81459	9.89843	10.5007	10.8351	10.9414	10.1179	10.1249	9.74116	10.6332	10.0207	10.3429	10.7139	10.6763	10.5886	11.7525	11.125	11.2349	9.90542	9.78197	10.2602	9.85961	9.49013	10.2029	9.86294	10.0143	10.5891	9.99652	10.3596	10.5381	10.7543	10.7332	10.877	11.2743	10.5887
Os03g0140400	Cytochrome P450 family protein.	cytochrome P450, putative, expressed	10.0847	9.92927	10.7183	11.0022	11.0307	11.1585	12.0833	11.9885	11.6575	9.73801	10.4911	10.6412	10.2144	10.6156	10.2191	11.1787	10.9477	10.7011	12.6243	12.3547	13.3157	12.6583	12.9488	13.024	12.3123	11.7041	11.1568	12.5941	12.8895	12.163	5.43705	6.20053	6.22821	5.35524	6.27886	6.1752	6.64252	6.52279	6.45165	5.88902	6.5493	6.12883	4.90765	11.3455	8.49538	12.1581	10.5668
Os03g0143900	(No Hit)	dirigent, putative, expressed	6.98353	6.021	7.07582	6.30405	6.46567	6.79099	5.79595	5.64605	5.86879	4.39212	4.75257	5.06676	5.72031	5.67646	6.04147	5.71285	5.43761	5.72178	5.60058	5.07993	4.95897	5.83796	5.58996	5.97248	4.79995	5.5884	4.82084	5.01719	4.87917	5.50374	9.4073	9.03471	9.88441	10.0396	9.54198	9.61892	7.48775	6.92871	7.86882	6.90081	6.22958	8.21113	5.35468	5.0873	5.79798	3.6351	5.58638
Os03g0148400	Conserved hypothetical protein.	expressed protein	6.98158	6.8541	7.04507	6.99539	6.79923	6.73117	7.03254	6.92261	7.03061	7.19894	6.90663	6.86266	6.20017	6.4436	6.39777	5.88294	6.05757	6.43072	7.75451	8.14049	7.6312	8.70009	8.51439	8.65092	7.20898	6.27609	6.60732	7.57301	7.38266	6.4399	7.40597	6.81904	7.05072	7.46178	6.38251	6.92388	5.75868	6.23674	6.9106	7.04611	6.4425	7.02323	9.49152	8.94525	9.04121	7.9399	9.04579
Os03g0161400	IQ calmodulin-binding region domain containing protein.	IQ calmodulin-binding motif family protein, putative, expressed	6.22854	5.71064	6.31729	8.35833	8.39029	8.41762	6.62036	5.62871	5.58619	3.94905	4.36874	5.61954	4.61169	3.69294	3.30859	4.02677	3.0244	2.87042	9.77369	7.88956	10.6133	8.90198	10.5225	11.1613	5.49021	5.87847	6.78186	4.48676	5.54994	7.06052	8.58571	8.20891	9.201	8.71472	8.24393	8.311	6.11205	6.50109	7.57527	6.83605	7.04719	7.59131	8.80464	10.7088	10.5031	7.0658	10.5892
Os03g0165400	Relative to SR12 protein (Fragment).	beta-galactosidase, putative, expressed	5.75196	5.12761	7.8744	7.0874	5.21602	8.20373	1.39145	2.83169	2.27068	3.36674	2.57337	4.15038	1.59869	2.50661	3.08026	3.22873	1.60704	5.44623	13.0793	12.2712	12.8812	13.3598	13.8877	13.9674	4.59147	4.76254	6.72511	3.86308	6.50174	5.87877	12.1581	11.992	11.9725	12.1403	11.5743	11.2687	10.3218	10.0351	10.6446	9.575	10.3315	10.4422	14.5051	14.2865	14.0832	10.9337	14.5286
Os03g0165900	MS5-like protein (Fragment).	tetratricopeptide repeat domain containing protein, expressed	6.75127	7.05563	6.62404	5.84272	5.60675	5.98038	9.25117	9.38396	9.30997	8.46836	9.4754	6.17483	11.0512	8.65869	8.9201	8.93103	11.4189	7.13075	8.47108	9.08807	8.66204	7.97135	7.08092	6.87883	7.23144	6.75533	7.20035	9.32071	9.08143	7.29461	5.65626	6.03708	5.61059	5.82568	6.37388	5.72244	5.07869	5.58907	5.82058	5.55079	5.68351	6.23067	5.68415	6.87058	7.02111	9.26095	5.83734
Os03g0169900	Conserved hypothetical protein.	expressed protein	12.6497	12.6354	12.3425	11.3266	11.505	11.2365	12.5656	12.8589	12.9873	12.0147	12.0462	12.2791	12.2126	12.5768	12.4004	12.2458	12.3457	12.3312	11.2281	11.6314	10.7379	10.9537	10.266	10.4738	11.4651	11.2444	11.5023	12.0239	11.3768	11.3206	10.2145	9.72696	10.761	10.2454	9.60775	9.85681	7.62764	8.4816	9.67195	9.09479	8.69673	10.1664	11.5704	10.5803	11.1362	9.20205	11.2414
Os03g0181100	ZIM domain containing protein.	ZIM domain containing protein, putative, expressed	8.56714	9.27944	13.2287	8.07404	8.21453	9.59201	9.51787	8.69498	10.2018	7.52526	9.254	8.8476	8.63595	9.24603	9.32773	8.46655	8.06049	8.98101	10.7986	11.2915	14.1286	9.93005	9.4526	10.648	9.19371	8.70866	8.99691	8.97406	9.28774	9.65002	10.0731	10.0423	12.0624	10.6717	10.983	11.8131	10.2183	9.94947	11.8341	10.3965	9.73111	10.4763	7.23309	5.4577	5.64757	9.08953	6.98841
Os03g0186800	Modifier of rudimentary (Mod family protein.	modifier of rudimentary protein, expressed	9.90208	9.80095	9.78094	10.109	10.1497	9.85716	10.5177	10.6713	10.8302	10.6379	10.5571	10.5171	11.1434	10.9229	11.0262	10.9509	10.8674	11.2225	9.98482	10.3174	10.3601	10.4936	10.2574	10.6383	10.8082	10.2325	10.3489	10.5566	10.7217	10.8481	10.3259	10.1713	10.7322	10.1929	9.91027	10.5865	10.2866	10.1216	10.7434	10.0945	10.2268	10.754	10.5865	10.63	10.8823	10.5498	10.4033
Os03g0196400	Protein of unknown function DUF588 family protein.	membrane associated DUF588 domain containing protein, putative, expressed	8.05026	8.64366	8.20633	10.2535	10.3533	10.0346	9.00245	9.43186	10.1355	10.3982	10.0731	10.22	12.2745	12.43	11.846	12.2353	12.1528	12.9074	10.8825	10.813	11.8987	11.7058	11.3251	12.0027	10.9521	10.5493	10.2927	11.9389	11.1659	10.7907	8.9484	9.57072	10.1861	9.29176	9.37183	10.6118	8.09656	8.75912	9.06412	8.91865	8.19274	8.81425	10.067	9.78791	10.3961	9.43365	9.78643
Os03g0197800	Hypothetical protein.	ZOS3-04 - C2H2 zinc finger protein, expressed	11.972	11.4414	11.1325	10.7332	10.4197	10.5837	10.4724	10.9686	10.9806	10.6717	10.4005	10.2425	11.5387	12.0192	11.5687	11.0809	11.5173	11.7835	10.0219	10.5775	10.024	10.8507	10.5589	10.3621	10.2323	9.7354	9.76976	11.3692	10.7642	10.5157	9.25274	9.22263	9.02651	9.58226	9.5955	9.70047	9.28782	9.48328	9.58413	10.3155	9.84401	9.67342	9.77478	8.96066	8.62473	8.93941	9.64758
Os03g0198200	Hypothetical protein.	No Hit	7.0175	6.98314	6.42369	7.25809	7.07501	6.28111	5.92984	6.13138	6.26502	5.88471	6.27287	6.83123	7.08266	7.35021	7.34668	7.4224	6.31671	6.62828	6.94068	6.28585	5.91643	7.26547	7.20446	7.65204	7.53448	7.14643	8.32247	7.20657	6.38021	7.09538	4.81114	4.66223	5.41732	6.55403	6.43886	6.47718	5.57807	4.25038	4.68835	4.80884	4.82358	5.49205	6.09783	5.32384	4.97016	6.28328	5.51641
Os03g0203300	(No Hit)	No Hit	5.49925	5.78888	4.82105	6.18812	6.95141	6.43713	6.86737	7.12417	7.06443	4.80453	5.51852	5.04267	5.26725	5.26508	4.19568	5.60336	5.78147	4.34228	3.47651	4.06604	3.75304	4.71655	4.87867	4.59125	5.95839	6.18827	5.94952	3.86307	5.55193	5.68283	3.85664	4.41195	3.86268	4.21869	5.21502	4.5463	5.2909	4.81889	5.10111	3.72539	4.61204	3.68785	2.57885	2.95631	2.38273	4.81674	3.94537
Os03g0204100	Actin-binding FH2 domain containing protein.	formin-like protein 6 precursor, putative, expressed	8.54715	8.00295	9.83236	7.66356	7.23488	7.71505	7.67332	7.51224	7.51495	8.52076	8.578	7.31038	8.90062	8.81719	8.24366	9.06762	9.11211	8.9208	9.0978	8.56914	9.69756	9.10733	9.70249	9.60344	6.74606	6.32124	6.08711	8.61142	9.16458	8.00672	10.5519	10.2387	10.1011	10.624	9.89929	9.95787	10.1572	9.92123	9.85491	9.64642	9.59452	10.0505	11.2165	11.287	11.2343	11.491	11.2408
Os03g0206400	Conserved hypothetical protein.	expressed protein	10.7577	10.4196	12.4423	13.5134	13.6815	13.7864	13.5164	13.6586	13.0473	13.3392	13.6416	14.2006	11.548	11.8013	11.7942	13.6135	13.0354	13.2744	14.0048	13.834	13.9363	13.5904	12.9075	12.7768	14.3896	14.2221	13.5205	15.2855	14.3789	14.5105	13.241	13.3311	13.5374	13.0962	13.3553	13.4701	13.7871	13.5202	13.7962	13.4712	13.5835	13.7439	12.0784	12.2159	11.8533	14.9686	12.2682
Os03g0211900	Leucine-rich repeat, typical subtype containing protein.	leucine-rich repeat resistance protein, putative, expressed	8.86266	9.04105	9.70355	10.3575	10.3699	10.7953	8.74346	8.79887	8.80624	10.1363	10.5182	9.8518	9.2045	8.56131	8.87687	10.5876	10.4892	10.5686	10.8046	9.99757	11.4506	11.181	11.7674	12.2134	9.01255	8.84297	8.89331	9.39282	10.6441	9.55001	10.845	10.9357	11.3214	11.0784	10.7159	11.2164	10.0816	10.087	10.6341	10.4699	10.3148	10.7316	11.4195	11.8031	12.0255	12.0344	12.1462
Os03g0221600	Conserved hypothetical protein.	leucine-rich repeat family protein, putative, expressed	5.58952	5.5122	5.43716	6.07985	6.43934	5.13835	5.87005	6.21144	5.74244	6.37337	6.30686	6.09449	5.12841	5.59793	5.42268	6.87213	6.96135	6.96376	3.66804	4.54314	4.87517	5.46663	5.13666	5.15871	5.74885	6.04797	5.70385	6.31505	6.34059	5.84529	4.37059	4.987	4.96278	5.25963	5.28747	5.19221	5.85141	5.59097	5.84569	5.03251	5.43224	5.55822	3.04354	4.2556	2.91894	5.72615	5.12275
Os03g0223000	Atypical receptor-like kinase MARK.	expressed protein	7.96057	7.48887	9.52986	7.57151	7.36699	9.39791	6.70291	6.82747	7.78686	6.47395	6.75473	7.48763	7.81308	7.1083	7.73686	7.38419	6.83813	7.82688	9.29179	8.49504	10.4983	9.56271	10.2971	10.8996	7.32613	7.54764	5.96957	6.91667	6.72301	7.59842	10.6078	10.6884	11.9263	10.503	10.7917	11.0102	10.2653	9.1312	10.7447	9.27538	9.25446	10.3738	10.1407	11.4104	12.1809	10.4912	10.9256
Os03g0223700	ARM repeat fold domain containing protein.	HEAT repeat family protein, putative, expressed	9.61571	9.75629	9.91014	9.9966	10.0779	9.98482	10.401	10.3659	10.185	10.5097	10.5467	10.5212	9.87757	9.92146	9.72447	9.88136	10.2236	10.2367	9.05778	9.24235	9.42925	10.0994	10.004	10.3432	10.6952	10.4584	10.7261	11.6446	10.9135	11.1724	9.69294	9.40275	10.0582	10.0789	9.35514	10.2243	9.25834	9.87	10.295	10.6118	10.1657	10.3848	9.64517	9.96823	9.84306	10.9932	10.4011
Os03g0234500	Haem peroxidase, plant/fungal/bacterial family protein.	peroxidase precursor, putative, expressed	0.960263	2.40766	2.46721	2.66593	1.91347	1.78103	-0.53171	0.0422401	2.43561	2.75651	1.62701	1.08468	0.828494	2.86674	2.639	4.09182	3.55828	3.33184	6.77473	8.98194	8.62504	7.66893	6.61782	7.25858	6.55623	5.68131	4.8394	6.57865	2.70596	-0.158277	5.88567	6.09891	7.06478	6.60075	5.70392	6.40964	8.05311	8.13871	9.34546	9.40199	8.61384	9.69454	2.4873	2.15808	3.08668	3.23834	2.86374
Os03g0234900	Peroxidase (EC 1.11.1.7).	peroxidase precursor, putative, expressed	2.65803	3.29239	6.25619	2.30817	2.84413	1.4057	1.74242	3.37845	-0.276293	2.2013	2.39048	1.04789	2.50234	2.76976	2.73006	2.90893	2.11659	-0.588748	13.3831	9.68957	13.6521	10.5069	12.0736	12.9605	4.34802	3.47586	5.05206	2.20795	2.58652	-2.92844	11.5742	9.89419	11.1734	11.5863	10.3958	9.75323	6.51802	7.16551	9.87988	9.07716	7.2073	10.0086	10.3671	13.3745	14.1284	11.3465	13.2683
Os03g0237000	Nonaspanin (TM9SF) family protein.	transmembrane 9 superfamily member, putative, expressed	12.2645	12.4427	12.0246	12.4134	12.5594	12.1633	12.4197	12.8825	12.9643	12.6609	12.9897	12.553	13.2961	13.2405	12.72	13.0441	13.15	13.2596	13.3124	13.1251	13.4397	13.5829	13.532	13.5102	13.3161	13.1393	13.1383	13.7898	13.266	13.1213	13.97	13.8686	14.2676	14.0729	13.5955	13.9143	13.1577	13.191	13.979	13.4906	13.1645	13.844	13.634	14.5257	14.7987	14.0905	14.3697
Os03g0241300	Hypothetical protein.	expressed protein	12.4375	12.3624	12.17	12.5625	12.4185	11.7867	12.6752	12.7095	12.4864	12.5497	12.4732	12.0038	12.2209	12.8591	12.7913	11.7374	12.5488	12.4882	11.4047	11.7763	11.2658	11.1817	11.2836	11.2303	11.2871	10.5876	11.3547	11.8353	11.7597	11.0088	11.2755	11.089	11.5516	11.4963	10.5179	11.0979	10.3889	11.294	11.4845	11.8351	11.388	11.5974	12.215	11.6582	11.6425	11.6901	11.7193
Os03g0241900	Senescence-associated protein 12.	senescence-associated protein, putative, expressed	11.6873	11.3403	11.4227	10.8622	10.7616	10.838	11.604	11.6006	11.4911	10.281	10.7025	10.5749	10.2412	10.5406	10.2818	9.34453	9.47022	9.60736	10.5584	11.875	10.9377	10.9736	10.059	10.0697	11.4516	11.2606	11.3936	11.596	11.7487	11.7547	10.5328	10.0948	10.5539	10.1987	9.68735	10.3011	10.695	11.25	11.3604	11.003	10.9008	11.2618	9.64445	10.2187	9.69621	10.5025	9.56483
Os03g0245200	Protein of unknown function DUF1210 family protein.	POEI1 - Pollen Ole e I allergen and extensin family protein precursor, expressed	3.35148	3.05827	3.01653	3.441	3.46544	2.44494	2.16193	2.2187	1.89343	2.57221	2.25014	2.89088	1.90957	3.22628	2.18084	2.43551	2.63076	4.24576	13.2446	10.4001	12.9148	12.782	13.4452	13.5136	2.37562	3.53266	5.71342	2.50569	1.38451	4.01525	1.13493	3.75203	2.46065	2.13113	2.69556	1.70673	4.7738	2.24991	1.69833	2.61443	2.25475	1.68258	11.1063	14.589	15.0233	11.1082	14.2768
Os03g0247900	F5O11.14 (ACR8).	ACT domain containing protein, expressed	9.99175	9.68119	9.91826	9.76499	9.26999	9.68268	9.66014	8.90234	8.86212	10.4737	9.94902	10.1749	10.3238	10.2823	10.1705	10.4521	10.0649	10.5819	9.72007	10.2137	9.92392	9.90957	9.85688	9.65376	9.24147	8.92991	8.63209	10.4955	10.0281	9.74325	10.6219	9.84906	10.1219	10.3382	9.65825	10.0345	9.02135	9.81356	10.169	11.1806	10.2947	9.45985	9.91537	9.87544	10.1347	11.0545	10.3681
Os03g0248300	Cytochrome P450 76C4 (EC 1.14.-.-).	cytochrome P450, putative, expressed	3.16346	2.70204	3.07773	3.83992	3.41804	4.45685	5.62398	5.10469	5.12279	5.02568	4.44601	5.16563	5.13166	4.87271	5.05985	7.27352	7.20162	7.58669	5.75726	3.39149	6.46786	4.82925	6.486	5.61305	5.36363	5.76934	5.98421	5.94207	5.96483	6.39096	4.28839	4.66921	2.13582	4.03092	5.74282	4.74412	4.66998	4.77702	2.74991	3.18398	4.27327	3.06779	4.42145	5.44377	4.98808	7.16334	5.00135
Os03g0249100	Hypothetical protein.	expressed protein	10.7475	10.3949	10.8395	9.92785	9.86572	10.2303	10.7297	10.388	10.1257	10.2691	10.0496	11.0331	9.76532	10.161	9.85604	9.8836	9.66453	9.83964	11.7824	11.1106	10.6376	12.0684	11.6005	11.0257	9.43717	9.23234	8.73605	11.1307	10.5695	10.6267	4.15389	4.36408	4.28011	4.68296	4.69051	4.35885	3.59118	4.06884	4.13567	4.07528	4.22657	4.59106	11.2656	10.2374	10.5252	6.93751	10.5775
Os03g0267500	Protein of unknown function DUF620 family protein.	expressed protein	8.3837	7.76712	9.28041	8.42882	8.3142	9.22865	8.7088	8.69839	8.92411	8.35221	8.62327	9.04115	8.9712	9.49281	9.13307	9.85227	9.6957	9.89219	10.5391	9.09959	10.5225	10.1134	10.7816	10.7622	8.95147	8.91931	8.74642	11.3023	9.87738	9.41309	10.4284	10.2162	10.3425	10.6546	10.8486	11.0832	10.4482	10.7417	10.745	11.1085	11.4053	10.4609	8.22251	10.9184	11.4348	12.3482	11.5337
Os03g0268400	Mannose-1-phosphate guanyltransferase (EC 2.7.7.13) (ATP-mannose-1- phosphate guanylyltransferase) (GDP-mannose pyrophosphorylase) (NDP- hexose pyrophosphorylase).	mannose-1-phosphate guanyltransferase, putative, expressed	7.69609	7.40152	8.74736	9.48876	9.92021	10.3522	8.9973	8.95958	8.75728	11.8787	11.9813	11.7686	8.23348	8.62023	8.62255	11.9762	12.1004	11.4037	13.0021	12.5272	11.7338	13.4914	13.181	13.2044	11.1149	11.2455	11.4124	13.797	13.4093	12.8656	14.114	14.1816	14.3138	14.0278	13.9721	13.7576	13.0624	13.0169	13.8635	13.5702	13.3184	13.7371	13.5018	13.559	13.4476	12.9234	13.4411
Os03g0271900	Peptidase A1, pepsin family protein.	aspartic proteinase nepenthesin precursor, putative, expressed	4.53469	3.3485	6.56768	2.42268	1.85786	4.72383	3.17329	2.09824	3.23145	2.08435	1.90822	3.06013	2.53753	1.77261	1.88854	2.2546	1.57771	0.775789	9.30482	7.82262	8.71973	8.28294	8.15835	8.89721	8.69356	8.80107	8.17944	7.05444	7.94578	9.29267	7.82538	8.01741	8.40306	8.11774	7.62958	7.30352	6.77142	6.86059	7.77726	6.18218	7.16317	6.4348	6.86853	8.60079	9.28635	10.2623	8.92468
Os03g0275500	Epsin, N-terminal domain containing protein.	clathrin assembly protein, putative, expressed	13.9445	13.7355	13.3384	13.3585	13.3389	12.7908	14.0045	14.0528	13.852	14.3974	14.4238	13.5162	14.0298	14.0982	13.3667	13.7849	13.8964	13.7259	13.3945	13.7105	13.5371	13.4793	13.5474	13.2644	13.4619	13.0843	13.4453	14.5426	14.376	13.6383	13.9926	13.6329	13.8869	13.9512	13.6031	13.561	13.75	13.5279	13.8743	13.9055	13.7087	13.6521	13.3638	14.0913	13.8663	14.3044	13.7982
Os03g0276900	Glycosyl transferase, family 14 protein.	N-acetylglucosaminyltransferase, putative, expressed	9.04587	8.37093	9.54529	8.52195	8.05933	7.41532	8.72527	8.00142	7.55238	9.05636	8.04936	7.63953	7.99117	7.66886	7.91731	7.84892	7.93137	7.51798	7.53686	7.31906	7.58445	7.26575	7.46288	7.70843	6.50041	6.68768	6.87619	7.44603	7.35914	6.4764	8.83166	7.77074	7.88858	8.60559	7.61518	8.19561	6.89053	7.45783	7.59824	9.22503	7.87618	7.29931	8.65133	8.59413	8.31869	8.24168	8.55717
Os03g0285800	MAP kinase 1 (MAP kinase MAPK5a).	CGMC_MAPKCGMC_2_ERK	9.8947	9.43987	10.1995	10.2147	9.85681	9.79643	9.83594	9.25993	9.30341	10.7302	10.7064	10.3838	9.38632	8.60179	8.16955	10.2098	9.97461	9.46901	10.0025	11.1996	10.4724	10.0246	9.43423	9.43754	10.0416	9.7348	10.2113	10.7235	10.723	9.62246	12.031	11.5791	12.0091	12.4105	11.7902	11.8804	11.2653	11.3864	12.0225	11.9023	11.5869	12.0123	6.58483	7.91219	8.48714	9.63033	8.53908
Os03g0298700	Hypothetical protein.	expressed protein	6.70341	6.65611	6.35801	7.40343	7.36718	6.47994	8.90469	8.9027	8.60097	7.14975	7.47559	6.8599	7.10529	6.47098	6.29089	6.87282	7.10491	6.24102	7.15576	5.79266	7.20188	6.97114	7.49958	7.06924	7.81518	7.94704	6.88725	7.49563	7.83423	6.52511	9.11592	9.08962	9.67935	9.52505	8.88721	9.36197	8.37753	8.56098	9.42418	8.84248	8.77929	9.31629	8.0845	9.04366	9.90679	8.70042	9.1423
Os03g0299200	Glucose/ribitol dehydrogenase family protein.	oxidoreductase, short chain dehydrogenase/reductase family, putative, expressed	10.4811	9.41616	11.8656	9.49834	9.39011	11.3057	10.1827	9.21661	8.98036	9.37954	10.0041	9.92164	8.32502	8.10521	7.21481	9.72224	9.05107	8.86993	11.4906	10.7624	11.7953	9.90375	10.8179	10.2264	12.5224	12.0494	11.1965	11.8261	12.8693	12.9411	11.4164	11.5099	11.8464	11.8906	12.2899	12.2243	11.8842	11.6991	11.7702	11.9059	11.8127	11.8352	5.70918	9.04853	8.2107	10.1705	7.85517
Os03g0301200	COBRA-like protein 7 precursor.	COBRA-like protein 7 precursor, putative, expressed	6.90034	6.69504	7.66708	5.73977	5.7986	6.0512	7.25851	7.08148	7.3267	6.92836	7.05704	7.085	7.81676	7.11982	6.9469	6.82566	6.7391	6.6761	9.75996	10.1222	8.50086	10.1923	9.80088	9.27855	7.67271	7.84805	7.89808	8.28396	8.31993	8.0944	10.9387	10.741	11.1054	11.086	10.4508	10.3582	9.53979	9.53325	10.2805	9.96918	9.55512	10.2736	11.5251	10.9614	11.1116	6.04677	10.8152
Os03g0315400	MYB-related protein 340.	MYB family transcription factor, putative, expressed	6.87245	6.78604	7.61279	7.75695	7.5407	8.52315	8.4396	8.5665	9.09087	8.44844	8.93961	8.30733	6.58569	6.95548	7.10266	7.32941	7.81985	8.60033	7.93669	9.39016	8.99546	7.77205	6.98367	6.96904	11.1392	10.4601	10.6912	10.3263	9.92708	9.38497	6.78858	7.1534	7.5633	6.98901	7.63511	8.07986	8.43317	8.96051	9.1584	6.94582	9.77746	8.40555	2.19147	3.78684	2.88232	7.53408	4.25141
Os03g0321500	Protein of unknown function DUF630 domain containing protein.	DUF630/DUF632 domains containing protein, putative, expressed	11.952	11.4665	11.0738	11.5664	11.0756	10.3468	12.0954	11.7931	11.5014	12.8326	12.2148	11.251	12.4404	12.0761	11.7103	12.2441	12.1654	11.7639	10.9729	11.4486	11.5964	10.4542	11.1266	10.862	10.5366	9.9119	10.4566	11.98	12.3687	10.9492	11.3598	10.3265	10.8842	11.2172	9.67166	10.3015	10.1113	10.2218	10.8853	11.3476	10.4952	11.0581	10.0384	11.5803	11.3237	12.4834	11.1778
Os03g0323500	Arf GTPase activating protein family protein.	GTPase-activating protein, putative, expressed	5.83395	5.75633	4.80289	8.18745	8.03526	7.34425	7.23005	6.80081	6.67554	9.22336	8.76372	8.31582	6.75988	6.70954	6.26502	7.76555	8.31717	7.35032	9.08747	7.55273	9.93253	9.11842	10.3512	10.1772	5.39281	5.10708	5.90278	5.94843	6.34317	5.45099	8.97038	8.53603	8.89151	8.96609	8.18625	7.92996	6.24179	6.5416	7.38275	7.07721	6.79941	7.38812	10.3198	9.76228	9.80373	5.27044	10.2585
Os03g0324600	Disease resistance protein family protein.	disease resistance RPP13-like protein 1, putative, expressed	6.29026	6.65059	7.81874	6.81979	6.99786	7.29489	6.57274	7.44272	7.56666	8.33838	8.48953	8.22993	7.63969	7.31373	7.0395	8.29271	8.31698	8.34482	7.35461	8.08498	7.45726	7.63977	7.31461	7.54757	7.69508	7.35638	7.0514	8.36286	8.28166	7.39813	8.18217	8.36337	8.64016	8.37245	8.17638	8.60193	8.11541	7.81688	8.39993	8.5048	8.03909	8.56238	8.23574	7.90116	7.92617	7.07628	7.87807
Os03g0328000	Adapter protein SPIKE1.	guanine nucleotide exchange factor, putative, expressed	9.73971	9.80106	8.60773	9.9067	9.79677	8.76617	11.1558	11.0536	10.7965	10.1946	9.84332	9.16951	12.1291	11.7731	11.3986	10.4001	10.8849	11.1412	11.9959	12.0617	12.3421	12.8305	12.9452	12.5599	11.0613	10.8419	11.0196	11.3396	11.1748	11.1995	12.1938	11.7078	11.8585	12.1928	11.3824	11.3532	11.3664	11.2152	11.6498	11.681	11.5276	11.8703	13.9676	14.0927	13.8388	12.5313	13.8558
Os03g0334200	Hypothetical protein.	expressed protein	9.07345	8.937	8.71924	10.801	10.7495	10.1471	10.1846	10.0136	9.87669	11.3906	11.3845	10.9492	9.44516	9.61755	8.6923	10.3307	11.0158	10.707	8.94617	9.9008	8.66646	9.43587	9.14321	8.62836	9.88408	9.6087	9.44743	11.1657	11.0884	10.2907	9.81669	9.58646	9.7824	9.86636	9.72186	9.98879	10.0362	10.5214	10.7956	10.9088	10.5656	10.726	7.76959	8.99345	9.05842	9.93525	8.85499
Os03g0336400	Expansin S1.	expansin precursor, putative, expressed	4.804	3.8288	6.0803	3.79534	3.60649	5.93292	3.57555	4.39591	4.22247	3.22639	3.2213	4.28622	4.33108	3.90219	4.18591	4.48221	4.02874	5.20233	11.5916	10.8604	9.52262	11.2972	11.1997	11.5772	5.69558	4.60797	7.59103	5.20134	4.11358	5.65707	6.17516	6.99326	7.2309	6.58279	6.42718	6.78334	8.14606	6.69678	7.0196	6.24785	6.79401	5.92936	13.3693	12.4051	12.8227	9.14262	12.786
Os03g0353400	Poly(A)-binding protein C-terminal interacting protein 243.	expressed protein	7.84358	9.35015	8.49324	6.49225	7.53007	6.84373	8.32839	9.07594	8.44134	7.86937	8.39465	7.90554	8.6018	9.00001	8.8469	7.73577	8.51449	7.56962	7.59737	8.13638	7.82549	6.54394	6.46205	6.50746	7.67225	7.24553	8.1269	8.53133	7.80115	4.93575	6.97476	7.24794	7.84326	7.0694	6.72554	7.26839	7.75373	7.87689	8.22473	7.11509	7.27328	7.63294	11.1712	8.83109	7.33064	7.23195	7.9675
Os03g0361500	Terpene synthase, metal-binding domain containing protein.	terpene synthase family, metal binding domain containing protein	4.58471	4.7599	5.16125	4.69967	4.63076	5.08978	3.80453	5.25188	4.17137	3.31811	4.2258	4.99782	3.73933	4.20631	4.6149	3.96153	4.64942	4.38652	5.50978	4.29068	5.82966	4.6684	4.77098	5.47972	5.2871	6.13389	5.5216	4.77249	4.72085	5.43838	4.93647	5.13904	5.2734	5.09709	5.1288	5.79099	6.68888	5.9396	5.87839	6.44582	6.02357	6.07579	4.5304	5.03689	5.40408	5.71982	5.22819
Os03g0374500	RNA-binding region RNP-1 (RNA recognition motif) domain containing protein.	calmodulin-binding protein, putative, expressed	3.25138	2.35628	1.84656	1.64579	2.12189	3.87064	2.51041	2.26787	1.48224	2.86304	2.23659	1.92778	2.47201	2.50787	2.10857	3.10627	2.43808	2.07724	3.44078	3.43088	3.18014	3.77819	3.66135	4.30543	-0.629339	4.94221	4.73374	1.28895	1.93001	3.08943	5.23889	3.91998	4.93345	5.26701	4.68783	4.81684	3.27065	3.77366	4.02722	5.44437	4.06263	4.63328	5.38091	5.80768	7.08776	2.65674	5.4135
Os03g0383200	(No Hit)	No Hit	1.86506	1.71574	2.79355	1.79488	0.570987	0.464061	2.27911	1.56209	2.15624	1.42192	1.20257	1.01365	2.86245	1.26368	2.27698	2.37557	0.713952	2.80108	1.47935	1.92219	2.50106	1.85306	1.99203	2.78725	4.8027	4.3547	3.97501	3.15361	2.91589	5.06317	2.41162	2.71991	2.11691	1.40525	3.61105	1.47757	2.57052	2.79711	-0.186666	1.61396	1.08822	2.42163	0.85657	1.14816	8.73105	0.825993	1.27775
Os03g0383600	Conserved hypothetical protein.	3-ketoacyl-CoA synthase, putative, expressed	1.80384	1.48556	4.08196	2.6748	1.72717	6.83811	1.87433	1.14708	1.67428	0.631891	2.16906	2.90742	1.74004	2.13917	3.01021	0.418238	2.28316	2.63156	3.89802	3.92322	3.13076	3.87114	3.82005	2.70316	4.54497	5.85114	4.25626	4.0196	2.65907	4.53016	4.72004	5.15978	3.60143	4.3304	6.11084	4.95274	4.828	5.47313	3.57975	3.58004	5.08453	2.823	1.84583	2.28746	2.69123	2.22048	2.10618
Os03g0397700	Serine/threonine protein kinase-like protein (Strubbelig receptor family 7).	STRUBBELIG-RECEPTOR FAMILY 7 precursor, putative, expressed	4.49774	4.02679	5.147	4.55621	4.49644	4.70802	5.54445	4.38756	4.62568	5.25318	4.72124	5.19453	4.12284	3.92375	3.8898	4.53462	5.17631	5.01279	6.29715	6.21452	6.57469	5.85306	5.62017	6.126	6.5115	6.31051	6.22617	6.53024	6.0474	6.90711	5.77228	5.88688	5.27025	6.30454	6.60006	6.08259	5.4181	6.04647	5.34393	5.95133	6.22467	5.76179	2.88646	6.14571	6.87181	7.34663	7.44992
Os03g0399300	(No Hit)	potassium channel protein, putative	6.55483	7.15731	7.55344	7.76474	8.76704	9.00932	8.01751	7.9864	7.39415	8.36911	9.04855	10.0104	6.80587	7.7031	7.89342	8.28166	8.20068	8.86671	11.5444	10.312	10.3411	11.1273	10.574	10.881	9.74524	9.96361	10.5869	11.4337	10.8305	10.8613	8.97254	9.7279	9.5745	8.9283	9.51346	9.56507	9.34579	9.542	9.67927	9.6374	9.95501	9.60503	12.0008	12.2936	12.1706	12.9355	12.703
Os03g0407400	(No Hit)	No Hit	1.75805	1.27146	3.37789	1.62026	2.45978	1.34778	2.89586	2.46245	2.81082	2.7395	2.11636	3.28525	3.2894	2.52936	2.69246	2.82648	1.73329	2.5755	3.03609	3.32317	2.27827	2.23667	1.68435	2.48024	2.88514	4.1937	2.51249	1.90092	2.75923	4.29722	5.23386	5.54101	4.95043	4.96892	5.13797	4.10446	3.44536	4.02071	3.53084	3.87505	3.51055	3.87577	3.33925	2.08679	2.72936	3.22451	2.32704
Os03g0438100	Allene oxide cyclase precursor (EC 5.3.99.6) (Allene oxide cylase).	allene oxide cyclase 4, chloroplast precursor, putative, expressed	12.874	13.2512	13.5404	11.722	11.8717	11.779	12.5918	13.0748	12.7559	11.4234	12.1643	11.5563	12.4856	12.6116	12.2601	11.8468	11.8612	11.7798	13.1494	13.2717	13.8737	12.9058	13.133	13.0819	12.9113	12.3842	12.3506	12.5503	12.3932	12.4752	13.4069	13.4897	14.0214	13.7121	13.8236	14.1567	12.7691	12.5461	13.3126	12.3603	12.2964	13.2301	12.92	13.6263	13.3963	13.2382	13.2154
Os03g0558700	Conserved hypothetical protein.	expressed protein	7.20552	7.10584	7.24321	7.58375	7.63011	7.84977	6.57713	6.39971	6.53217	7.26685	7.23948	7.7333	7.13889	6.692	6.4227	7.56645	7.46925	7.65156	9.45369	8.81207	9.58259	8.62013	8.94954	9.13773	7.50816	7.45251	6.90496	8.30164	7.87696	7.39705	8.16896	7.98278	8.24358	8.01714	7.65084	7.61648	6.58661	7.08809	7.48752	6.65967	6.67629	7.51272	6.9649	8.36715	8.75894	8.21591	8.05377
Os03g0573500	Disease resistance protein family protein.	No Hit	2.19094	2.561	4.98012	2.50545	5.55763	2.91163	2.16679	1.05014	2.32112	2.50564	2.58555	2.5137	2.63318	1.42188	2.70166	2.2817	2.4134	1.79863	2.13209	2.43926	2.46948	2.49243	1.93416	1.07175	2.64011	5.49258	4.2638	3.10296	2.55897	3.68425	3.94775	3.7282	3.93129	3.69105	4.86096	3.88969	4.49144	3.71958	3.11065	3.03974	3.43409	2.51381	2.42229	2.51876	2.3584	2.22748	2.08074
Os03g0626500	Endonuclease/exonuclease/phosphatase family protein.	endonuclease/exonuclease/phosphatase family domain containing protein, expressed	4.63557	4.66275	4.69877	5.31811	5.0806	5.1	6.4989	6.1574	5.63159	5.0529	4.90789	5.49134	6.96516	6.84703	6.48592	7.1199	6.96071	6.8697	4.51966	5.08448	5.3153	4.0803	3.82415	4.04368	6.10673	6.04202	4.96355	5.95984	5.29875	6.0107	3.95354	4.49817	3.83154	4.01794	4.88057	4.00399	5.0542	4.78316	3.51391	3.71089	4.36625	3.88756	5.40621	4.92423	4.86426	5.18311	4.68203
Os03g0640000	Patatin family protein.	PLA IIIA/PLP7, putative, expressed	3.96137	3.8832	4.88906	3.35182	4.1097	4.74788	3.5554	3.57118	3.96476	3.75765	3.87404	4.94417	4.38589	4.22276	3.18821	4.76241	3.53974	4.45832	6.53001	5.4062	6.59923	5.97493	7.2621	7.35177	4.20618	4.65501	4.85237	4.1998	4.93063	3.54314	5.91349	6.3356	6.27252	6.10465	6.96336	6.24552	6.40807	6.62517	5.69611	6.12561	6.25658	6.28644	5.84457	6.14782	6.2042	4.4391	6.34185
Os03g0645300	(No Hit)	hypothetical protein	5.72703	5.3522	5.76616	6.17152	5.96389	5.99311	5.45967	5.30096	5.75433	6.31731	5.81009	6.56327	6.08288	5.11172	4.25063	6.16905	5.6649	5.07955	6.5413	6.26991	6.63176	6.23351	6.70365	6.64433	7.16038	7.61647	7.19583	9.08098	7.48914	6.75425	7.67753	7.37315	7.89274	7.89315	7.03838	7.48393	7.95799	7.94834	8.46547	8.27514	7.41525	8.29459	6.61515	6.50116	6.14164	6.08806	6.67309
Os03g0645900	9-cis-epoxycarotenoid dioxygenase.	9-cis-epoxycarotenoid dioxygenase 1, chloroplast precursor, putative, expressed	9.37694	9.7288	9.88092	10.1077	10.0857	10.483	8.51024	9.07224	9.46822	8.64358	9.15936	9.41749	9.63458	9.52042	9.57344	9.24556	9.36179	9.966	10.2647	9.95244	9.83865	10.6278	10.0808	10.5089	10.1338	10.0117	9.86422	10.0527	9.97281	10.4511	8.95021	9.58257	9.61033	9.19233	9.64815	9.5145	9.18777	8.34029	8.91807	9.02915	8.26588	9.08705	10.3641	10.5736	10.2529	9.26352	10.4917
Os03g0650000	YABBY protein family protein.	YABBY domain containing protein, putative, expressed	11.449	11.6474	11.0548	10.849	11.2488	10.5397	10.6268	10.4921	10.435	9.10345	9.90014	9.31919	8.4602	8.46333	8.1367	8.21334	8.30432	7.57683	11.7865	12.1359	10.8716	12.1623	11.7177	11.6156	11.0081	10.4656	11.4023	10.6892	10.9921	10.591	4.43839	5.49149	3.65608	3.13938	3.42849	3.91297	4.28461	3.29983	2.88757	2.68812	2.75232	2.50057	4.91611	7.1359	7.64272	7.85089	6.82979
Os03g0656500	K-exchanger-like protein.	sodium/calcium exchanger protein, putative, expressed	11.8845	11.7134	11.9994	10.8525	11.1728	10.7741	11.795	11.8259	11.9394	10.1606	9.93438	9.72736	11.6058	11.8816	11.4923	10.9585	11.1736	12.0631	10.5615	11.0027	11.6859	10.9856	11.4585	11.2953	10.4026	9.86724	9.98209	10.8101	10.5734	10.1034	8.65307	8.96823	8.88981	9.17858	9.60146	9.5202	9.58006	9.5392	9.44766	9.72731	9.58284	9.38769	9.93465	10.7593	10.4887	12.0804	11.0058
Os03g0663700	Inositol-1, 4, 5-trisphosphate 5-phosphatase-like protein.	endonuclease/exonuclease/phosphatase family domain containing protein, expressed	8.90224	9.25479	8.02103	7.75706	7.7031	7.28231	8.06082	8.69745	8.33693	8.1045	8.84383	7.10452	7.48709	8.09657	7.65497	7.67504	7.81391	7.52511	7.04266	7.16901	6.72084	7.97861	7.96367	7.98287	6.65935	6.21217	6.25714	6.52234	8.06812	6.50584	6.77209	6.53426	6.50049	7.27621	6.8164	6.40498	5.87305	5.64514	5.681	5.55824	5.93857	6.10371	9.68858	9.70073	9.54109	9.56578	9.36929
Os03g0673800	Protein of unknown function DUF221 domain containing protein.	RXW8, putative, expressed	9.91532	9.77962	9.82039	8.34214	8.37463	8.39343	8.23941	7.65066	7.55938	7.13631	7.18636	6.56442	7.20033	7.12616	7.27517	6.37314	7.04982	6.48775	8.3409	8.47306	8.97741	6.82002	7.59383	7.75078	6.62476	6.55728	6.90967	6.98413	7.3732	7.33093	8.00738	7.74216	7.67034	7.7828	7.20903	7.88759	7.6146	7.99044	7.59663	8.00838	7.8717	8.05789	8.99604	9.27338	9.2425	10.0958	9.41921
Os03g0683700	Protein of unknown function DUF810 family protein.	expressed protein	8.25976	8.40828	8.11828	8.72192	8.83437	8.26079	8.99565	8.63452	8.41505	8.70995	8.76075	8.42514	8.73249	8.90387	8.67385	8.84245	9.24537	9.16367	10.0494	9.99867	9.90461	10.6508	10.8114	10.746	8.81317	8.95817	9.14344	9.29141	9.19516	9.23426	10.6656	10.2611	10.6384	10.6559	9.73468	9.85091	8.90147	9.23093	9.77636	9.21937	9.52785	9.92735	11.6107	11.7098	11.4157	10.315	11.4559
Os03g0692400	Protein of unknown function DUF966 family protein.	domain of unknown function DUF966 domain containing protein, expressed	4.2399	3.79773	4.34229	5.04583	4.90143	6.04095	4.36562	4.4815	4.65858	5.05227	5.30948	4.59965	2.00109	3.12835	2.65733	3.52809	4.54777	5.1194	9.06732	8.48799	9.39616	10.0837	10.4595	10.3061	5.44551	4.28853	5.37804	4.62962	5.88726	6.18255	7.44867	7.08709	7.51859	7.87984	6.83839	6.74135	4.55729	4.71228	6.29219	5.40898	6.19761	5.97773	9.9024	9.80586	9.86034	7.48815	10.1382
Os03g0703100	Beta-glucosidase.	Os3bglu8 - beta-glucosidase, exo-beta-glucansase, high similarity to Os3bglu7, expressed	7.079	7.3505	7.25541	6.86987	7.07907	7.09201	5.91561	5.03418	4.13656	5.60684	5.32007	5.16844	4.82859	4.29943	4.26063	5.68722	5.93661	5.6068	12.153	11.3444	11.5642	12.1527	12.4177	12.9079	3.52143	4.76294	6.45779	5.8386	6.37844	6.3856	11.3333	11.0665	11.3515	11.3469	10.7244	10.4196	8.11833	8.6081	9.78514	9.72576	9.45451	10.065	13.9333	13.691	13.5374	9.36792	14.2121
Os03g0708700	Protein of unknown function DUF593 family protein.	expressed protein	7.9822	8.01739	8.13806	7.51548	7.38885	7.5184	9.40135	9.49001	9.6084	7.47046	7.77197	7.44802	9.18104	9.41544	8.89527	7.7251	8.08699	7.54065	9.51624	9.23626	9.1055	9.70103	9.59826	9.51861	9.57433	9.20027	9.58942	8.16668	8.8559	8.56807	9.92529	9.66369	10.153	9.94275	9.46743	9.43351	8.91855	8.73944	9.60605	9.02683	8.74676	9.54261	10.9213	11.2787	11.3332	10.7547	10.9888
Os03g0722500	Glycoside hydrolase, family 17 protein.	glycosyl hydrolases family 17, putative, expressed	5.94694	5.06787	7.26754	5.65378	6.09493	6.51413	9.40918	8.97477	8.47706	7.77488	8.78905	8.03228	6.93065	6.87075	6.96138	6.67572	6.72889	6.81722	10.7006	11.11	10.4949	11.2639	10.8017	10.8183	10.3898	9.92456	10.2829	11.8473	12.2296	12.0682	11.9832	12.027	11.6936	11.9526	12.099	12.1618	11.8311	11.7862	11.6495	11.154	11.4233	11.1792	10.7915	10.3231	9.76707	12.688	10.9724
Os03g0736500	Syntaxin-related protein KNOLLE (Syntaxin 111) (AtSYP111).	syntaxin-related protein, putative, expressed	1.88837	5.39061	3.93942	2.31576	2.03441	2.97114	5.74687	5.05214	5.15168	3.62077	4.66758	3.6362	2.78328	2.20262	2.02177	2.79546	2.01936	2.50101	12.5951	12.06	9.41295	13.6488	12.97	12.6984	2.78481	6.43562	6.66968	1.41851	5.70677	7.45822	12.5158	12.2647	12.1747	12.6053	12.6075	11.8759	10.0023	10.2238	10.8466	10.4625	10.7104	11.1436	13.6584	12.8439	13.0848	3.66113	13.3064
Os03g0745200	Transferase family protein.	transferase family protein, putative, expressed	4.11635	2.80054	4.3471	4.3955	4.48562	4.48373	4.767	4.61339	4.88883	5.07301	4.64556	5.29566	3.46487	4.19573	4.52257	4.77992	5.68834	5.82408	12.4087	11.6912	12.1533	12.8864	12.6426	12.3429	8.35304	8.89878	7.12601	8.54421	7.46346	7.69119	11.1891	11.0051	11.5033	10.6644	10.6485	10.5707	8.87457	8.73008	10.1322	9.23647	8.74421	9.23179	10.6617	11.8531	11.7416	8.61441	11.1508
Os03g0764100	Conserved hypothetical protein.	ZOS3-18 - C2H2 zinc finger protein, expressed	11.7037	12.0038	12.0588	12.5036	12.4499	12.4743	11.8585	12.4858	12.0728	12.5014	12.4452	12.2141	11.8182	12.2391	11.52	12.3024	12.6137	12.7061	10.9301	12.4029	12.0013	11.1165	10.9368	10.6037	11.7823	11.201	11.5878	12.5666	11.9993	11.1626	11.814	11.6652	11.9901	11.6201	11.7883	11.6622	11.3525	11.6092	12.2932	12.3555	11.7093	11.4555	5.26648	8.86166	8.22597	11.6182	8.26365
Os03g0766500	Myb, DNA-binding domain containing protein.	MYB family transcription factor, putative, expressed	5.56437	5.57733	5.03699	5.24164	5.00696	4.99005	6.29468	6.08162	6.13118	6.15729	5.94262	4.88646	6.69205	7.05704	6.98789	6.24095	6.62404	6.23755	6.89707	6.58359	6.64197	6.76553	6.96545	7.37235	4.77572	6.35933	5.56254	4.79087	6.18052	6.68	7.18583	7.0085	6.96048	7.12778	6.89093	6.38302	5.56865	5.6822	6.01821	6.10245	5.97413	6.05713	9.8938	8.79673	8.66829	7.85801	9.39119
Os03g0772900	Conserved hypothetical protein.	expressed protein	2.74647	2.23558	3.33627	2.69137	1.09995	3.17101	1.33327	1.23431	5.82569	1.45005	2.67422	3.26214	3.76751	2.56945	4.09008	3.73581	3.11976	2.56172	3.28407	2.93959	2.20303	3.58983	3.49558	3.42128	4.7051	6.03961	4.18253	2.99616	3.06886	4.7802	3.51058	4.29018	2.68334	2.41053	5.05372	3.07881	4.64914	4.47787	2.94555	2.64267	4.57548	3.04846	6.92482	5.02223	4.99876	6.3875	6.44467
Os03g0793600	Endonuclease/exonuclease/phosphatase family protein.	type I inositol-1,4,5-trisphosphate 5-phosphatase, putative, expressed	4.37874	4.97016	4.05061	4.26594	3.99329	4.51046	3.73542	3.56561	4.18637	3.80648	4.43719	4.25457	5.00091	4.39717	4.2228	4.71239	3.70782	3.31121	6.75482	6.68267	5.1208	7.56305	7.51653	7.50446	6.07054	-2.5743	4.17338	3.31718	3.31337	4.66893	6.93516	6.98835	6.84351	7.09415	7.19442	7.00398	5.86339	6.42391	5.1476	5.41345	6.12069	5.02642	8.3731	7.09442	7.38751	4.02264	7.98396
Os03g0812400	Calcium-binding EF-hand domain containing protein.	EF hand family protein, putative, expressed	4.46739	3.46807	5.35424	5.08748	6.8698	6.35641	5.7969	6.12624	6.20786	7.19698	6.58534	7.42543	5.72106	6.36925	5.37146	7.19265	6.47511	5.28837	6.04808	6.23318	4.98322	6.42607	5.61409	6.33559	5.16459	5.14266	4.57037	7.39175	6.88634	6.33898	5.56986	5.71443	5.67939	6.18398	6.70165	6.72629	6.07888	6.08294	6.1236	7.01567	6.28962	7.19399	6.96592	6.03368	6.20806	4.76388	6.38944
Os03g0816800	Protein of unknown function DUF567 family protein.	DUF567 domain containing protein, putative, expressed	5.57719	5.22971	6.02649	5.74243	5.59915	5.47562	6.02248	5.85906	6.34534	7.43266	7.28625	7.66064	6.87696	6.21445	6.00625	6.58356	6.54122	5.87626	6.37001	7.11737	6.38222	6.13077	5.46073	5.4774	6.67264	6.59424	5.51113	7.29489	6.78294	6.47659	7.30945	7.16352	7.71488	7.45544	7.37817	7.93845	6.61227	7.25465	7.69569	7.85681	7.38105	7.61249	6.74241	6.78279	6.492	5.19755	5.74109
Os03g0817000	Actin-binding WH2 domain containing protein.	No Hit	10.5797	10.4028	9.38295	9.13113	8.77453	8.17953	11.2842	10.9395	10.7592	10.5429	9.90846	8.94507	10.4781	10.6105	10.4334	9.20389	9.96062	10.429	10.0512	10.3813	10.3147	10.5676	10.737	10.5269	10.0256	9.94083	10.5762	9.82256	10.2994	9.72462	9.84038	9.23659	9.60028	9.58786	8.40464	8.88718	8.74977	9.233	9.53781	9.92286	9.21946	9.50789	11.7583	11.1562	11.0562	10.8166	11.4564
Os03g0818800	LIPLESS2.	AP2 domain containing protein, expressed	6.63794	6.75086	6.89794	8.37954	8.80162	8.45568	7.74776	7.27496	7.0674	8.58504	9.26313	8.70785	7.12863	7.49678	7.46799	8.67533	9.49574	8.87339	8.49968	8.62719	8.27721	8.61579	8.91795	9.10624	7.66216	6.48139	7.14539	7.73555	7.77426	8.08758	8.0307	8.59408	8.59639	8.6025	9.08484	9.09127	7.09227	7.59087	7.71615	7.52696	7.79291	8.24572	8.00753	8.75702	7.83961	9.60862	8.55169
Os03g0819400	Heavy metal transport/detoxification protein domain containing protein.	heavy metal-associated domain containing protein, expressed	11.7235	11.7082	11.575	10.6149	10.7849	10.3868	12.1953	12.0045	11.8603	9.49239	10.1447	10.5971	11.1013	11.943	11.6138	10.093	9.8608	9.97718	14.5821	13.3913	12.1571	13.8846	13.4763	13.0021	10.9638	10.9366	11.7376	11.1853	11.2892	11.0614	11.3912	11.2353	11.2511	11.0357	10.6018	10.2607	9.68054	10.4443	11.0158	10.7619	10.2889	10.9292	14.3707	13.3121	13.2312	9.79875	13.6881
Os03g0821300	Protein phosphatase 2C-like domain containing protein.	protein phosphatase 2C, putative, expressed	12.5091	12.8081	12.3572	11.7777	12.0142	11.692	11.7861	12.4745	12.7971	11.8784	12.0832	11.8241	12.6079	12.6211	12.4017	12.3359	12.4078	12.8375	10.8792	11.8461	11.4384	10.8969	10.9061	11.095	11.3033	11.1472	10.7499	12.3859	12.2107	11.2798	11.6199	11.6592	12.0997	11.5732	11.5253	12.3353	12.0649	11.9453	12.576	12.2598	12.3194	12.556	10.8975	11.0737	11.2097	11.5024	11.1401
Os03g0822000	Alpha-expansin OsEXPA7.	expansin precursor, putative, expressed	3.77408	2.59179	3.02418	2.75641	2.63762	3.69174	1.51889	3.31855	0.989198	1.1285	1.80558	1.53268	3.76623	2.30738	1.35349	2.1173	1.79965	2.093	12.8746	10.4236	12.8723	12.1852	13.0368	12.8025	3.92533	4.88511	6.19254	4.54778	4.8183	5.662	9.05431	9.30442	8.98505	9.49528	9.08593	8.37141	6.9965	7.07935	7.85706	7.53081	7.60504	7.59586	11.9084	12.9254	12.8447	10.6951	13.0251
Os03g0823800	Xanthine/uracil/vitamin C permease family protein.	nucleobase-ascorbate transporter, putative, expressed	3.46053	2.85945	3.26534	3.00453	4.20858	4.61818	2.90777	3.28446	1.1585	3.30474	2.20936	2.97762	1.14594	2.23115	2.85116	0.509189	2.23121	2.1915	8.98761	8.76716	7.54578	9.82087	9.69547	9.58319	2.7987	2.40942	4.26712	3.28907	2.40192	3.57579	10.0382	9.44594	9.58833	10.0863	9.24135	8.78927	6.92584	6.73805	7.78099	7.61023	7.32891	8.13387	11.0691	10.5633	10.3491	7.0326	10.8918
Os03g0833800	Glycoside hydrolase, family 28 protein.	polygalacturonase, putative, expressed	7.84722	7.36466	7.22892	8.44439	8.08994	7.85834	8.87231	7.90371	7.7954	9.33925	8.61798	8.43696	7.63837	7.45585	7.80501	8.154	8.25382	8.14864	9.17862	8.41933	8.29939	9.43534	9.35816	9.89304	7.78263	7.09942	7.97208	8.41749	8.22142	8.41987	9.14331	8.45418	8.79432	9.42183	8.23913	8.59716	7.75903	8.3023	8.53146	9.27219	8.51087	8.96724	10.3177	10.2871	10.2533	9.01491	10.6574
Os03g0834300	(No Hit)	No Hit	3.5712	3.274	3.93488	4.32441	4.55319	4.85256	4.40693	4.48964	3.56796	6.77658	7.23609	7.57673	2.4413	3.70621	4.05407	4.71303	4.83175	7.04715	8.08239	7.43408	6.15593	8.18226	7.41794	6.94573	4.1312	4.93349	4.23112	6.41718	7.41537	8.05813	3.64559	4.82826	4.51165	4.10441	5.04546	4.51815	4.81612	4.72247	4.71629	5.32388	5.57398	5.47071	9.0672	8.25592	8.15392	8.96859	9.20734
Os03g0837100	Cellulose synthase-7.	CESA5 - cellulose synthase, expressed	8.76414	8.01075	9.63339	8.32484	8.09434	9.1571	7.38801	6.5008	6.29341	7.42542	7.27508	7.14228	5.27754	5.38845	5.07638	5.79654	5.83791	6.30945	11.5294	10.2059	12.2494	11.8646	12.5709	12.7969	7.02601	7.78591	8.28304	8.51618	9.15069	10.2153	12.3089	11.741	12.5065	12.6144	11.7622	12.0127	10.6078	10.4313	11.5126	11.1591	10.6725	11.5414	12.1306	13.4735	13.7535	12.9486	13.6484
Os03g0850700	Phosphatidylinositol phosphatidylcholine transfer protein sec14 cytosolic-like protein.	CRAL/TRIO domain containing protein, expressed	9.07159	8.41394	9.59732	7.55499	7.30123	8.49147	10.4935	10.0181	9.99693	9.15592	8.62137	8.82278	9.17306	9.25104	8.83629	7.53908	7.68689	7.14388	11.4437	10.5445	11.8431	9.75832	10.6339	10.5208	10.3276	10.2858	9.97416	9.70931	9.75849	9.80309	8.099	7.58316	8.21085	8.02862	7.55332	7.56218	6.96472	6.77404	7.33864	7.34255	6.73215	7.21178	8.959	9.682	9.15986	8.1751	7.51978
Os03g0857500	Conserved hypothetical protein.	receptor protein kinase, putative, expressed	8.19121	8.01651	8.70156	7.1954	7.60654	7.42533	8.37525	8.36742	8.03144	6.27865	6.47455	6.12817	5.02743	5.52448	5.61255	5.68026	5.72434	6.87554	10.683	9.89776	9.47504	11.0581	10.6027	10.5466	5.31728	4.24988	4.60315	3.91942	4.86292	4.97496	10.4046	10.3372	10.6293	10.3804	9.83493	9.37723	7.10084	7.75975	8.9579	8.62158	7.9918	9.44658	11.4571	10.6067	10.8728	9.73137	11.1372
Os04g0126500	Hypothetical protein.	No Hit	4.95485	6.82531	9.42993	8.54201	8.84472	8.58383	6.30938	7.4316	7.54595	7.97901	8.42451	8.47725	5.94548	5.80009	6.3501	8.58692	8.70195	8.96461	8.1965	5.71265	8.84788	7.56043	8.51793	8.6301	5.50706	3.65931	-0.503467	6.64766	8.10447	7.11253	3.16941	3.9933	3.36772	3.31023	4.72823	3.80211	4.6001	4.79042	3.51547	3.12564	4.51834	3.14674	7.36002	6.6798	6.42268	8.98955	7.31498
Os04g0137100	Pectate lyase (Fragment).	No Hit	5.40119	4.52712	7.62763	4.21992	4.55246	8.7852	5.59721	5.23229	4.98268	4.04038	4.37495	5.74633	3.40335	3.64045	5.11575	1.6124	2.98543	3.52311	12.6556	10.0806	13.6722	12.1061	13.9198	14.3024	7.48521	7.30941	8.37742	6.21577	7.46194	8.25256	9.77269	10.1669	10.2307	10.463	10.0214	10.0509	8.40823	8.14136	8.66677	8.72054	9.16728	8.35443	11.3049	14.0344	14.8011	13.6497	14.6067
Os04g0169500	Hypothetical protein.	avr9/Cf-9 rapidly elicited protein 137, putative, expressed	10.1283	9.89657	9.96872	8.65722	8.41438	8.50905	9.32088	9.29674	9.09868	8.31213	8.42969	8.56695	10.2734	10.7309	10.3601	9.40154	8.90357	9.94272	9.75836	9.17789	9.4064	10.4507	10.2562	10.0709	7.16845	6.94006	7.41198	8.32243	8.02781	8.90491	8.85743	8.3399	8.40669	8.92697	8.63906	9.0957	8.28287	8.13461	8.48808	9.37375	8.93345	8.53713	9.41928	9.62182	9.75916	9.45329	9.59162
Os04g0218400	ERD3 protein.	dehydration response related protein, putative, expressed	8.24247	7.99724	8.73156	10.0708	9.84407	9.84928	8.82887	8.73002	8.4738	10.43	10.4468	9.18343	8.2	8.16795	7.77781	9.35758	9.933	10.2792	10.7898	9.77079	11.5727	10.9713	12.0482	12.1099	9.1726	8.87542	9.7165	10.866	10.8771	10.2002	10.321	10.0557	10.491	10.0613	9.84947	10.0949	10.0609	10.5399	10.6413	10.1618	10.9495	10.4529	9.60155	11.9752	11.8405	11.7757	11.6766
Os04g0268000	(No Hit)	No Hit	6.97044	6.45782	6.25266	7.07434	6.49569	7.21814	6.85777	8.18801	7.43742	6.13616	5.15334	6.72148	6.55363	4.80868	6.38849	6.99345	7.47119	5.68233	4.29439	4.94938	5.8475	4.62696	4.70933	4.64861	5.26853	5.93003	5.67951	4.75115	4.5039	5.7828	5.73092	6.14937	5.46283	5.76751	6.50755	6.91387	9.10994	7.06923	6.08693	6.74378	6.7113	5.53814	6.63493	4.97303	4.63278	5.83561	4.68149
Os04g0272200	(No Hit)	cytokinin-O-glucosyltransferase 1, putative, expressed	6.94042	7.02808	7.35062	7.36569	7.67006	8.18713	6.66682	6.3946	6.47517	6.68549	6.64979	7.83892	6.16805	5.31216	5.83517	7.84674	6.71897	6.77147	8.07353	7.23726	7.36255	8.93792	8.90725	8.80944	5.70382	5.80118	5.00068	6.51118	6.32993	7.31025	3.88797	4.47843	2.7749	4.20231	5.352	3.73688	5.11468	5.05353	2.41412	4.81002	4.57571	3.22914	6.97408	7.64797	7.78128	6.00807	7.43261
Os04g0277400	Membrane bound O-acyl transferase, MBOAT family protein.	wax synthase isoform 1, putative, expressed	5.17318	5.5195	5.2242	6.02283	6.28317	4.83803	6.4941	6.62306	6.97685	7.34586	6.97176	6.99547	7.41403	7.19916	6.95737	7.3908	6.98649	7.73171	8.39611	8.94987	8.09278	8.34594	7.91076	7.5903	8.53264	8.10565	8.83215	9.57725	9.11726	8.5531	8.2732	8.29449	8.16349	7.89252	7.95449	7.48643	7.38667	7.65101	7.67878	7.68901	7.71195	7.7438	8.36834	8.43752	8.28423	7.94636	7.96213
Os04g0301500	Basic helix-loop-helix dimerisation region bHLH domain containing protein.	basic helix-loop-helix family protein, putative, expressed	3.79169	2.44703	9.14795	6.2628	3.23253	3.50287	7.66099	5.00439	5.92533	4.36256	8.18169	7.16693	4.27717	1.97948	5.71433	2.81385	3.48194	3.11821	7.48969	7.51775	10.9965	5.2053	4.04344	3.22906	7.36542	6.5195	7.20637	8.35152	7.26961	7.32969	7.02519	7.22148	8.67676	7.30285	6.75106	6.66064	8.41142	6.95746	9.93471	7.63078	6.09744	6.72942	3.00903	4.28597	1.23838	3.25469	2.36417
Os04g0350700	Phytochrome-interacting factor 4 (Basic helix-loop-helix protein 9) (bHLH9) (AtbHLH009) (Short under red-light 2).	BEE 3, putative, expressed	3.54633	7.06457	3.2708	2.85813	2.79184	3.19542	2.68244	1.27346	2.10303	2.66957	1.61257	2.55977	1.98637	2.16785	1.65861	2.71276	1.97435	0.862925	6.6677	5.58714	7.89149	6.96294	8.20823	7.88762	3.79747	4.98719	2.7107	2.21926	3.44393	5.18794	8.46748	8.00379	8.2368	8.69989	8.27211	8.03875	6.84843	6.44029	7.31194	7.40117	6.94146	7.30181	4.30355	7.92942	8.18791	9.46739	8.73058
Os04g0361900	(No Hit)	retrotransposon protein, putative, unclassified	4.59225	4.75554	4.38106	6.16332	6.13515	5.86506	4.75446	4.46886	4.44168	6.24328	5.579	5.31197	5.10282	5.29732	5.8985	5.37023	6.1926	5.68307	4.45636	4.02824	4.38839	5.96076	6.49546	6.70653	5.30366	5.33056	3.69859	4.50434	4.56501	4.83297	5.85241	5.98112	5.96616	6.53439	6.52186	6.29558	5.89455	5.66358	5.08847	5.44913	5.19793	5.18616	5.39934	6.23648	5.8195	6.5294	7.48535
Os04g0380900	(No Hit)	No Hit	9.92351	9.86312	9.9574	8.1491	8.28242	8.27338	10.1105	9.86015	9.17727	8.70196	9.04291	9.09825	7.0193	7.49872	7.50229	6.80288	6.22026	6.46623	10.5801	9.87624	9.68721	9.55534	8.93357	9.7614	9.29657	9.31353	11.6537	9.80006	10.2884	9.32711	8.82233	9.2187	9.18645	8.95271	8.51495	8.71017	8.44804	8.51547	8.81447	9.17115	8.72183	9.65526	11.8369	11.5125	11.6335	12.0568	11.7499
Os04g0382800	Conserved hypothetical protein.	expressed protein	2.58076	1.14977	1.25892	4.41922	4.27992	5.22309	4.6531	4.97125	0.355372	5.42327	5.37274	4.20925	3.68185	2.46971	2.24787	4.25424	3.98559	4.15727	8.97186	8.09598	9.61814	9.70428	10.3152	10.1669	4.72368	5.83195	3.59861	5.22645	5.60254	5.48812	8.86456	8.52397	8.93505	9.12357	8.5053	8.07631	5.5592	5.95297	7.35518	6.74076	6.76237	7.08173	9.87338	9.74309	9.67171	9.17954	10.1597
Os04g0384800	Conserved hypothetical protein.	RALFL22 - Rapid ALkalinization Factor RALF family protein precursor, expressed	5.73838	6.06673	9.11145	6.58986	6.75608	8.81574	5.26046	4.76074	4.70321	4.10264	4.99482	6.48105	3.7633	2.19546	3.27676	3.31711	2.83316	2.8196	10.6536	7.27134	10.5854	10.1293	11.7293	12.2869	3.48359	3.44699	5.73166	2.72357	4.66857	5.88741	2.58256	2.61185	3.68947	2.81503	1.88042	2.25615	4.40416	2.52469	2.15876	2.66048	1.98833	2.36729	7.51643	11.2027	11.0593	11.3979	11.5848
Os04g0397500	Myb, DNA-binding domain containing protein.	transcription factor, putative, expressed	5.66532	5.12274	7.1589	6.37669	6.41953	7.26659	8.07518	7.73078	7.66474	8.01878	8.39561	8.64178	6.11202	6.1824	5.92958	7.22934	6.7557	7.04494	7.65186	6.24702	7.20434	7.24524	7.26328	7.42433	7.65767	7.63343	7.6903	8.22129	8.87797	9.07623	7.24413	6.97276	7.37634	7.48081	7.35014	7.56445	7.14612	6.84865	7.61136	7.23473	7.07617	7.04473	6.37821	6.20212	5.84866	9.31544	6.06862
Os04g0401100	Conserved hypothetical protein.	expressed protein	2.23105	1.30981	0.828243	2.22134	1.32229	2.89259	2.34686	0.332148	2.34664	2.39561	2.62748	-0.429199	3.43154	0.400122	0.150244	2.09797	2.16695	2.2634	5.48083	2.62547	4.95486	3.33205	4.599	4.51799	4.15821	3.87331	2.98606	1.83248	1.34903	4.15954	2.71987	3.05092	1.48674	3.07606	4.64311	2.82441	1.48153	3.40728	1.86641	1.75414	2.97302	0.742247	0.608221	3.74286	4.14565	3.41421	2.52913
Os04g0401900	Hypothetical protein.	Leucine Rich Repeat family protein, expressed	2.10138	3.45164	5.17104	2.93341	3.66014	5.00975	2.97655	4.165	3.89675	2.91997	3.12426	5.02816	3.03758	3.55437	3.7761	3.69448	3.54215	3.87488	5.12261	3.7649	5.37027	5.72154	6.63474	6.34276	3.78314	4.95106	3.65705	3.44343	2.74355	3.78963	4.83844	4.95027	5.04481	4.51001	4.52445	4.4109	5.57555	3.41326	4.31906	4.45564	3.45301	4.4955	7.05406	6.91034	7.28086	6.04289	7.84073
Os04g0402700	Hypothetical protein.	No Hit	11.6531	11.3748	12.0361	13.3363	13.1979	13.6947	12.0778	11.8409	11.8235	12.8639	12.9247	12.8815	12.427	12.6934	12.2993	13.2605	13.1064	13.0588	14.1124	13.45	13.6455	13.8513	13.9588	13.9115	12.0241	11.456	11.922	12.5202	12.4466	11.83	13.7892	13.5921	13.8994	13.687	13.4335	13.1071	11.312	11.5561	13.4621	12.2469	12.1364	13.2211	14.3347	14.8927	14.6951	14.0225	14.2342
Os04g0412900	Sec23/Sec24 trunk region domain containing protein.	sec23/Sec24 trunk domain containing protein, expressed	8.0266	7.87776	8.54988	9.03958	8.80892	8.54248	6.88757	6.37883	6.24107	6.77922	6.85179	6.47102	7.61418	7.45143	7.59879	6.66345	7.43378	7.30201	10.0659	9.72967	10.3905	10.8534	11.3692	11.4367	6.64368	6.45408	7.04204	6.94609	8.07041	8.2751	11.0903	10.701	11.1265	11.082	10.3541	10.2739	8.67599	8.68002	9.74808	9.12313	9.11032	10.082	12.0285	12.2609	12.0759	10.7207	12.4902
Os04g0414500	Hypothetical protein.	OsFBX132 - F-box domain containing protein, expressed	5.17929	4.94123	6.21466	4.67414	4.8742	4.42062	6.07278	6.17045	6.27381	6.14871	6.54888	6.2186	5.52462	6.03341	5.32026	4.52667	5.31081	4.65778	7.84234	7.9109	8.62888	5.75616	7.16895	5.81358	5.91272	6.39019	6.93165	7.78836	8.32417	7.84508	6.27924	6.75135	7.00176	5.67291	4.90426	5.65086	6.78144	7.12965	8.00714	6.96427	6.39029	7.16861	8.70058	7.42791	4.95927	8.84436	6.71508
Os04g0415100	Uncharacterized plant-specific domain containing protein.	DUF623 domain containing protein, expressed	3.60553	4.2999	2.61613	2.75199	3.05366	1.35978	0.979827	2.57825	3.287	2.54625	3.74674	2.1337	3.20955	2.80267	3.09994	3.39468	2.11791	2.84575	9.56264	8.80699	5.05431	8.82854	8.33446	8.61914	3.20499	4.97141	5.38385	3.07371	3.30766	4.52218	7.08355	6.80785	7.41222	7.47378	7.43355	7.47484	5.65891	5.70282	5.94418	6.10052	5.84112	6.52665	9.81433	8.77638	8.89477	6.32428	9.34444
Os04g0418800	Pistil-specific extensin-like protein family protein.	retrotransposon protein, putative, unclassified, expressed	0.879811	4.25394	2.3369	3.38	0.974614	2.87446	1.77873	2.85194	0.849785	2.24931	2.5526	2.12147	0.121851	1.3039	1.96977	-0.964297	2.79246	1.90547	3.96214	5.6601	2.95829	3.18395	4.14636	3.85295	-1.4316	0.875073	2.93081	2.63368	1.91307	1.27247	5.4188	5.97184	5.70044	5.44752	5.74697	5.24048	4.62842	4.36105	3.30086	4.47291	4.05884	3.30959	7.05533	4.51125	4.66134	3.36941	4.68099
Os04g0421900	Conserved hypothetical protein.	expressed protein	6.07265	5.79468	6.1437	6.78511	6.67671	6.07285	6.39071	6.53476	6.33186	5.91229	6.21864	5.39155	6.155	5.8479	6.13361	5.64489	6.35823	5.87561	6.34559	6.15776	6.55685	7.06686	7.22731	7.13406	6.49699	6.43197	5.833	5.63985	5.92181	5.50232	7.75899	7.43202	7.92162	8.07605	7.42915	7.46076	6.26798	6.34669	6.96616	6.16132	6.29914	6.60716	5.98951	7.25075	6.98419	5.39064	6.74809
Os04g0433300	Conserved hypothetical protein.	hypothetical protein	8.16615	8.54475	8.67648	7.14903	7.33651	7.73649	6.81727	7.94084	8.02455	6.57895	7.32087	7.20677	7.71714	7.75514	7.82381	7.4392	7.42701	7.842	7.32874	6.4782	7.74028	6.9949	7.69875	7.63597	7.23003	7.08469	6.43819	7.24431	7.8528	7.1139	9.10059	9.40692	9.96903	9.07967	9.36063	10.0235	9.24599	9.095	9.53101	9.20643	8.62169	9.66528	7.31113	9.08332	9.32878	10.6057	9.0605
Os04g0436000	Conserved hypothetical protein.	expressed protein	5.64608	4.99087	7.83512	6.21933	5.80442	7.67116	6.30334	5.76842	5.62998	6.47059	6.74912	7.56223	3.28303	3.37031	3.35412	4.7486	4.19768	5.43997	11.9265	9.74767	11.3881	11.1318	11.6006	11.3042	9.06082	9.29983	9.09979	10.6495	9.89014	10.217	10.9929	10.9666	11.3743	10.8572	10.0781	10.513	10.2709	10.3553	11.0661	10.2822	9.97718	11.0441	11.0582	12.719	12.8511	12.2891	12.0102
Os04g0441900	Cleft lip and palate transmembrane 1 family protein.	cleft lip and palate transmembrane protein 1, putative, expressed	11.9435	12.0463	11.4273	12.3393	12.3512	11.8578	12.564	12.7722	12.4547	12.8242	12.9529	12.1158	11.6031	12.1032	11.7499	12.3485	12.7157	12.645	11.7491	11.9759	11.4883	12.795	12.5728	12.4583	12.1123	11.6217	12.2227	12.7899	12.95	12.2593	12.3393	12.1008	12.2184	12.612	12.248	12.2118	11.1312	11.5418	11.6435	11.6044	12.1652	11.8679	12.7461	12.6562	12.4915	12.6698	12.7011
Os04g0455700	Conserved hypothetical protein.	expressed protein	7.88319	7.62065	8.71393	8.36886	8.6259	10.0482	8.93739	8.67816	8.98416	8.44349	9.5178	8.82246	7.98519	9.10911	8.54763	7.73614	7.87331	7.71002	8.76501	9.57388	8.50776	11.5083	10.6049	10.8393	9.03701	9.17123	9.33174	9.45579	11.3251	10.3499	8.47451	8.06091	8.19351	8.75895	9.26091	10.19	8.79784	9.53177	9.9969	9.60877	9.76264	9.93897	6.10145	5.99692	5.87743	9.80575	8.52391
Os04g0457700	(No Hit)	expressed protein	1.338	1.71604	3.53458	2.59296	2.77411	3.11611	1.97135	2.93857	-0.512025	2.63412	0.904893	6.80383	2.74193	2.50524	2.81128	1.58053	1.86212	2.22316	7.37653	6.41855	2.85855	9.37657	8.28377	7.08313	2.72483	1.82034	-1.0685	2.99655	2.05259	3.94292	2.99817	3.30193	3.22948	2.7341	3.40393	3.21871	4.6695	1.97621	2.18121	2.72817	2.14298	2.7591	8.05425	7.00633	8.09955	2.27568	7.66907
Os04g0459000	MDR-like ABC transporter.	multidrug resistance protein, putative, expressed	5.25202	5.00042	5.14222	4.32019	4.971	5.08511	5.11754	4.65597	4.76543	3.80646	4.36272	4.03409	6.15955	6.30403	5.53776	5.59114	5.46209	6.69786	13.9328	13.5243	10.7093	14.2724	13.916	13.9957	8.92198	8.52441	9.28688	10.1696	8.17889	6.99472	13.1586	13.4372	13.2757	13.2932	13.3443	12.6495	11.6471	10.8965	11.7705	10.957	11.9056	11.9411	15.5976	13.6092	13.8479	5.3879	14.9978
Os04g0461600	PGPS/D12.	expressed protein	7.85866	7.6694	8.61058	8.78434	8.74077	8.58571	9.01005	8.72837	8.35745	7.79378	7.85348	7.49476	7.75115	8.0513	8.03655	7.50532	7.05189	7.24262	7.67556	7.95328	7.95564	8.0845	7.69451	6.92867	6.48156	6.29756	7.11233	6.4832	6.75299	6.24131	6.85258	7.19603	7.43418	7.74747	7.65515	7.62766	6.01698	5.42232	6.71861	5.58053	5.57279	4.92719	5.49422	5.9386	5.38754	5.99943	4.45219
Os04g0461800	Actin-binding FH2 domain containing protein.	formin, putative, expressed	3.63209	3.27251	3.15112	3.58659	4.62807	3.95258	2.88779	1.763	1.0316	2.02215	2.49332	3.03816	7.11946	2.85113	0.352798	2.41956	1.209	1.90925	8.82231	8.0971	5.87852	10.0002	9.52391	9.35362	3.98609	4.05417	4.63167	2.63577	0.183563	3.10799	7.7112	7.35677	7.40808	7.98465	8.01345	7.19958	5.29865	4.23813	5.54356	5.90389	5.56937	6.19277	9.60729	8.77077	8.99353	4.39938	9.52918
Os04g0465100	Haem peroxidase, plant/fungal/bacterial family protein.	peroxidase precursor, putative, expressed	7.05639	7.43767	7.97588	6.54151	6.53125	7.59813	6.2973	6.59491	6.63999	4.23403	6.04561	5.90789	7.55999	7.0089	7.24984	6.29888	5.68064	6.14932	10.9175	10.7388	10.7747	10.637	10.4386	10.6617	9.29405	8.86507	9.32233	9.64266	9.66591	9.65693	9.5206	9.67486	9.51756	8.92471	8.88717	8.89093	10.7777	10.4927	9.9437	8.34733	9.34678	9.25553	11.1916	11.2419	11.714	10.093	10.6122
Os04g0466000	Conserved hypothetical protein.	No Hit	5.58265	4.96924	6.19029	6.17781	6.19929	7.63692	3.48066	2.84766	2.38332	6.48952	7.08498	8.10444	2.13741	2.33178	1.72438	4.04304	2.77283	4.26981	5.40491	4.25988	5.85296	6.64706	6.64215	6.73537	3.27485	4.20365	3.28467	4.20161	3.50822	4.98241	3.60648	3.09035	2.98046	3.43714	4.01287	4.45695	4.03499	2.54437	2.09644	3.1697	2.71518	2.95715	2.3348	7.48603	8.80549	9.98082	8.0908
Os04g0476000	Cyclin-like F-box domain containing protein.	OsFBO17 - F-box and other domain containing protein, expressed	8.83438	8.73196	8.25773	9.05816	8.93868	8.44224	9.42158	9.14928	8.78592	9.9252	9.52878	9.10872	8.80345	8.8997	8.99325	9.15779	9.54109	9.37772	7.68578	7.92581	7.8652	8.10934	7.99033	8.01896	8.02556	7.7543	7.99809	9.30889	9.46028	8.71142	9.73674	9.36693	9.24396	9.10384	9.06258	9.4505	8.93173	9.51692	9.30683	10.5646	9.68338	8.96367	8.11039	7.54106	7.19783	9.5603	8.36255
Os04g0492800	Calmodulin (CaM).	OsCML22 - Calmodulin-related calcium sensor protein, expressed	11.311	10.7543	11.77	10.4365	10.3234	11.2579	9.83106	9.8068	9.78752	9.72912	9.67719	10.493	9.47881	9.64087	9.64826	10.0349	10.0171	10.5299	10.1654	9.67772	10.2123	9.83613	9.93899	10.1427	8.22543	7.79457	7.78492	9.10816	9.3205	9.26586	9.84161	9.84775	9.84522	9.51904	9.69366	9.3969	8.67013	8.19499	8.92087	8.39702	8.61528	8.40807	7.48336	10.5794	10.2028	11.1468	9.96377
Os04g0493400	Endochitinase A precursor (EC 3.2.1.14) (Seed chitinase A).	CHIT2 - Chitinase family protein precursor, expressed	5.63839	4.7559	7.01087	4.79424	4.49707	6.6013	8.61667	7.67754	7.5145	7.38372	7.86575	8.33976	3.34659	2.86955	2.87742	3.2713	2.72278	4.21303	11.3887	11.6376	8.89136	11.2621	8.58189	9.70255	11.9268	9.95175	13.2425	10.2921	12.608	10.9644	4.81823	5.04306	5.50384	4.72107	5.68101	5.74117	4.5747	5.05029	4.13004	3.61643	4.49988	3.87847	2.396	2.6774	5.12527	7.2017	4.72398
Os04g0498700	Haem peroxidase, plant/fungal/bacterial family protein.	retrotransposon protein, putative, unclassified, expressed	3.07744	2.5346	4.22276	2.35434	1.25168	3.42325	1.48022	1.76151	3.17079	1.90136	2.37392	2.61882	3.29511	1.22551	2.72325	3.52148	1.4906	3.94011	11.1534	10.6244	11.1435	11.3126	11.4757	11.6443	5.23768	5.41184	5.30988	3.62766	4.64147	6.80042	6.36096	5.96037	6.37988	6.15019	6.46531	5.28264	5.864	5.57864	5.57164	4.05814	5.54869	6.53519	10.6464	10.314	10.5795	3.94882	9.72898
Os04g0501800	Protein of unknown function DUF1068 family protein.	expressed protein	10.6933	10.957	10.4915	10.4144	10.5741	10.2295	10.3179	10.3557	10.3145	10.3231	10.6887	10.4049	10.4188	10.3883	10.2389	10.5398	10.3703	10.1789	11.6084	11.373	11.669	11.6427	11.6196	11.7126	10.4745	10.3145	10.874	11.3553	11.3063	11.2581	10.8618	10.8114	11.3651	11.0096	10.4201	10.954	10.2146	10.732	10.8938	10.7335	10.6027	11.0786	11.3671	11.9336	11.9379	12.3665	11.9141
Os04g0502200	Conserved hypothetical protein.	expressed protein	10.255	10.5033	10.151	10.5173	10.5668	10.0673	10.9766	11.0835	11.1659	11.4941	11.542	11.0744	12.0028	11.8637	11.7089	11.4851	11.5372	11.9589	11.4738	11.6718	11.6834	11.7787	11.7619	11.9457	11.5976	11.4279	11.6458	12.3623	12.0288	11.8969	12.1641	11.9761	12.5062	12.0401	11.3478	11.851	11.5581	11.507	12.1803	11.4496	11.6567	12.2817	12.545	12.9286	13.013	12.1517	12.7207
Os04g0505200	Leucine-rich repeat, plant specific containing protein.	uncharacterized protein At4g06744 precursor, putative, expressed	6.84278	6.52759	6.62109	9.19446	8.69014	9.06405	5.68053	4.82807	4.44366	6.01416	7.00978	6.20219	3.81117	3.70531	3.37121	4.61752	4.35279	4.05751	11.2916	9.53132	12.7581	11.5743	13.4613	13.1204	4.26094	5.9665	5.43792	3.62249	4.45535	5.97403	12.4955	11.9787	12.8933	12.6262	12.0568	12.3073	9.36768	9.60573	11.0947	10.6592	9.36	11.6171	10.4478	12.9971	12.7477	13.4812	13.2761
Os04g0508500	Snapdragon myb protein 305 homolog.	MYB family transcription factor, putative, expressed	3.45298	3.33833	4.17723	3.34987	2.51797	4.1807	5.54725	4.77355	4.57956	4.18902	3.52977	5.16541	3.35511	4.11351	4.67604	3.80632	3.73752	4.31135	4.70775	4.1665	4.67278	4.83581	4.67475	4.33114	6.08724	6.59172	5.84066	7.23175	6.08497	7.69588	4.96543	5.44333	4.47039	5.02301	6.35185	5.92729	6.72768	7.57378	6.13142	7.38237	7.63269	6.27498	4.27249	5.15181	4.95322	5.41376	4.53114
Os04g0517000	Conserved hypothetical protein.	expressed protein	5.22893	5.87751	8.92716	7.84226	6.9678	8.24836	7.86176	7.76816	7.76942	6.67257	7.17874	7.28954	8.64803	9.74058	8.61424	8.13715	7.81978	7.76981	13.8768	12.9128	12.7851	13.8788	13.6549	14.011	6.2711	6.618	8.20924	6.96359	6.82112	6.87717	11.1374	11.2818	11.6465	11.0095	10.9914	10.9836	8.23445	8.62991	10.0775	9.03058	9.4231	10.2585	13.8362	13.5956	13.674	7.89104	14.1177
Os04g0517100	Myb protein.	MYB family transcription factor, putative, expressed	6.8691	7.99295	9.33211	6.26348	6.55345	7.55362	6.07291	6.1061	6.4581	6.73245	7.3299	7.5126	6.88168	7.03734	7.19506	7.20826	6.83083	7.73061	9.78393	10.3238	10.6667	8.82343	8.23129	8.93251	7.37308	7.83237	6.29249	8.76921	8.62089	7.2907	10.4304	10.5976	11.779	10.8589	10.4978	11.2674	10.3309	10.1433	11.2176	10.1132	10.0625	11.1069	8.39571	8.89466	8.98721	9.51031	8.5949
Os04g0530100	Beta-expansin 3 precursor (AtEXPB3) (At-EXPB3) (Ath-ExpBeta-1.6).	beta-expansin precursor, putative, expressed	4.54464	3.4604	5.09422	4.21274	4.16791	4.31991	2.72737	2.30863	2.54249	2.57092	5.77958	4.45388	4.16394	3.80608	2.83774	3.73524	3.17853	3.68532	10.5776	9.17856	8.38635	9.99884	9.96579	9.84977	5.17856	5.30351	4.71359	3.99854	3.54991	2.52775	8.72663	8.92428	9.11261	8.95288	9.08443	8.69571	7.17408	6.92082	7.61389	7.06124	7.29334	7.63575	11.5115	10.848	10.8524	5.77878	11.6289
Os04g0532400	Short-chain dehydrogenase/reductase SDR family protein.	short-chain dehydrogenase/reductase, putative, expressed	14.0704	14.1268	12.9427	13.7673	13.7364	12.2356	14.2398	14.1672	14.4421	11.1185	10.9706	11.2408	14.7061	15.1241	14.9689	12.9145	13.0785	12.616	12.8641	12.5309	11.5554	12.3858	12.2864	12.4086	12.9265	11.5781	11.1442	9.99758	9.74579	7.98426	3.50452	3.82104	5.38361	4.03077	3.28679	3.61797	5.02596	4.34454	4.22396	3.43093	3.96311	2.80445	13.4534	12.5871	12.4489	2.39334	11.8067
Os04g0534400	VAP27.	No Hit	8.47855	8.58027	8.21249	8.62076	8.67696	8.28981	8.82028	8.77937	8.60066	8.46101	8.84069	8.50047	8.49761	8.96021	8.57057	8.30704	8.83456	8.40977	10.7529	10.3167	9.50345	11.1782	10.948	10.5253	8.51959	7.95335	8.69808	8.64636	8.84122	8.60052	9.63873	9.54073	9.7537	9.94748	9.52719	9.5556	8.41233	8.58379	9.06878	8.86994	8.79606	9.36937	11.4004	11.5102	11.5462	10.7246	11.4122
Os04g0535500	(No Hit)	No Hit	7.28892	7.18128	8.12585	8.61442	9.07628	8.99435	7.99934	7.73058	7.64749	8.38642	7.80846	8.27598	7.49413	7.64984	7.80594	7.54415	7.63347	7.33804	7.90791	7.16084	8.00209	8.27277	8.23737	8.41155	7.12767	6.04387	6.98428	7.88216	8.14464	7.73124	8.85785	9.02151	9.23001	9.01768	9.30739	9.62036	8.73178	9.07813	9.21736	9.61432	9.67048	9.34541	5.45036	5.97642	6.23466	9.37856	6.53249
Os04g0536500	NAM protein.	No Hit	2.91064	3.62857	6.23721	2.18043	3.01231	4.13817	2.47711	1.97516	2.38303	1.57473	1.86079	5.18261	6.02372	2.85548	2.6061	4.20884	2.66285	2.28897	5.32594	3.50996	5.83519	4.13404	5.20152	4.54451	4.22285	4.96845	4.09921	3.26121	2.31408	0.683202	6.12088	5.68645	5.39055	6.10936	6.08645	5.74228	4.77526	4.1624	6.72255	3.8704	4.10979	4.58142	5.4736	3.58269	7.67678	6.66897	7.23516
Os04g0541100	Gt-2.	expressed protein	5.31421	4.81427	6.89393	5.09342	5.26219	6.91117	5.14514	5.11433	5.11838	5.73027	6.09348	6.89348	4.01615	3.59537	4.19287	4.26376	4.42918	4.64484	9.61245	8.55176	10.3756	10.3851	11.1785	10.9138	6.16383	5.79282	6.03794	6.99512	9.22799	7.77378	9.12972	9.30371	10.1792	9.00754	9.23825	8.92191	7.56666	7.30197	8.96156	7.77021	7.77769	8.80091	9.94395	11.2731	11.2491	10.3225	10.7196
Os04g0548700	Homeobox domain containing protein.	homeobox associated leucine zipper, putative, expressed	7.0946	7.32346	7.74005	4.90937	5.80106	5.89429	8.07467	8.44219	7.83735	6.0735	6.74058	6.7097	6.99617	8.05995	7.60192	6.7657	7.01417	6.54929	7.50329	6.3587	6.68609	6.34514	6.47337	6.26863	6.29419	5.93725	5.94593	5.38751	6.43138	6.46222	6.31237	6.61948	7.11986	6.31757	6.16543	6.13754	6.5771	6.51779	6.38797	6.30497	6.49311	6.21433	9.53218	7.84355	7.64202	8.00684	8.49484
Os04g0550200	Pathogenesis-related transcriptional factor and ERF domain containing protein.	AP2 domain containing protein, expressed	10.5011	9.91634	10.7875	7.77312	7.45095	8.92983	8.3632	7.43659	7.47691	6.97999	6.63203	7.24472	7.95281	6.84417	7.03681	5.77864	5.85266	5.50925	9.20019	10.3583	9.89658	9.5773	8.97976	9.48969	9.3367	9.11306	8.58024	9.75576	10.4147	10.306	8.94912	8.7847	8.89636	9.08841	8.51031	8.66645	7.87381	7.42665	7.97211	7.62915	7.22615	8.18813	9.69161	9.56923	9.53048	11.0526	10.028
Os04g0553500	Pectinesterase family protein.	pectinesterase, putative, expressed	0.387506	3.2918	1.92048	0.831367	1.03516	1.87139	0.991178	1.98441	2.08226	2.43763	1.03369	2.52274	3.32145	1.27583	1.2993	2.34275	1.45383	0.871958	11.6364	10.5532	11.1843	11.5782	12.0744	11.6198	3.96403	3.3312	4.70941	-0.491356	3.44931	4.01879	10.0522	9.32482	9.80975	9.58418	8.24478	8.25317	5.45309	6.27583	7.9988	7.39169	7.04421	9.05787	13.2311	12.5476	12.4829	5.58276	12.6348
Os04g0553800	Glycosyl transferase, family 8 protein.	glycosyl transferase 8 domain containing protein, putative, expressed	8.8149	8.91098	9.11954	8.26315	8.46953	8.26718	9.54033	10.0211	9.65155	9.35414	9.91791	9.39979	9.75787	9.74048	9.24073	9.43741	9.53	9.24157	9.7651	10.0289	8.87544	9.70325	9.21984	8.89101	10.558	10.4694	11.1249	10.7273	10.4613	9.61615	10.9523	11.1095	11.4435	10.8751	10.7606	10.9716	10.1555	10.3604	11.0437	10.3916	10.3253	10.5493	10.2057	10.277	10.1303	10.0054	9.91103
Os04g0557200	Anthocyanin regulatory R-S protein.	anthocyanin regulatory Lc protein, putative, expressed	1.99125	3.31853	3.01351	2.39131	2.43309	2.88308	2.4759	2.11623	2.96225	1.9379	2.28405	2.9303	2.23565	2.93052	0.580586	2.95576	2.10798	2.22676	2.85022	1.89765	1.6469	1.662	1.72888	1.23105	1.99496	2.94536	3.65817	1.96142	2.45018	4.49408	3.81951	2.41521	1.89364	3.01824	4.14289	1.991	3.60789	3.35846	2.15124	2.50126	2.85793	2.2035	2.71326	2.34569	3.14999	1.42631	1.37814
Os04g0560000	(No Hit)	No Hit	5.4809	5.15325	5.57386	6.02962	5.61935	5.64081	5.71604	5.02676	5.25632	6.37891	5.62747	6.33185	5.38748	4.55356	4.84425	5.55336	5.30386	5.47838	6.41018	5.86492	6.85777	6.04577	6.37539	6.72897	6.75611	7.22285	6.82429	8.80358	7.14161	6.33856	7.38445	7.0594	7.62581	7.63846	6.63637	7.20175	7.70479	7.75425	8.14079	8.22362	7.03325	7.97838	6.34485	6.11864	5.52918	7.54391	6.70279
Os04g0563900	Protein kinase domain containing protein.	protein kinase APK1B, chloroplast precursor, putative, expressed	4.53571	4.46559	6.05014	5.48132	5.28643	5.50316	4.13769	3.66476	3.92719	3.98922	3.85635	4.53773	3.29483	3.37085	4.29637	4.24482	4.36456	4.55074	5.12508	5.80764	6.01113	5.44472	4.97093	4.76873	5.33435	5.6324	5.79198	4.5618	4.00667	5.02097	9.62541	9.1447	9.96711	9.06762	8.91352	9.61118	7.39489	7.58024	8.05334	9.34895	7.76679	7.39278	5.71785	4.32511	5.75785	5.06953	3.39095
Os04g0573300	SBT2 protein (Subtilisin-like protease).	OsSub45 - Putative Subtilisin homologue, expressed	7.35039	7.38151	7.64647	6.66612	6.64562	7.40258	6.56256	7.44322	7.13364	7.8515	5.89271	5.87842	4.40146	5.50841	5.18095	5.21225	4.78749	5.41888	12.8331	12.2733	12.9975	13.8114	14.0102	13.9258	7.33479	7.1863	7.69062	5.4988	7.79387	7.97804	8.1992	8.92972	9.34708	8.7456	8.38862	7.5554	7.36044	6.51299	7.73888	7.11768	8.16769	7.79524	13.2061	14.2575	14.1871	8.44943	13.5536
Os04g0576900	Protein kinase domain containing protein.	leucine-rich repeat family protein, putative, expressed	9.08769	9.71826	10.306	9.31775	10.3651	10.8655	8.35957	9.61152	10.1945	8.80794	10.0496	10.7105	9.8923	10.7666	10.7875	9.2966	9.95167	10.6458	11.2307	11.588	9.33199	12.6832	12.37	12.2265	11.0113	11.3057	11.0224	10.696	10.5076	11.4427	11.8448	12.2633	12.4795	11.7908	12.1157	11.7435	11.0483	10.4589	11.2489	10.6248	10.6944	11.1087	13.6259	12.3276	12.5432	9.45735	12.9666
Os04g0580700	MADS box transcription factor MADS17.	OsMADS17 - MADS-box family gene with MIKCc type-box, expressed	2.53961	6.49624	2.3624	1.54789	2.3256	2.0753	2.28657	3.43309	1.81738	1.98912	2.90287	2.74177	2.98348	3.58032	2.62223	3.3899	2.06012	2.52316	1.51743	1.48065	1.34647	2.07081	2.15313	1.83893	1.05388	4.58455	4.7467	2.13367	2.28435	5.49611	1.66304	1.50924	0.691507	1.40751	2.29867	1.97165	2.20886	1.47195	2.26503	0.850744	-0.00848797	2.51948	2.03923	2.49927	2.66912	2.97757	1.71337
Os04g0585100	Zn-finger, DHHC type domain containing protein.	zinc finger family protein, putative, expressed	8.72065	8.78658	8.62669	7.87558	7.72099	7.94654	6.77025	5.83311	5.51677	6.56738	6.65152	6.54896	4.27807	4.58465	4.45142	5.27981	5.7956	5.14026	9.38958	9.03244	9.09428	9.77688	10.0176	10.0561	5.47062	5.07444	5.40623	4.97905	6.01205	6.67327	9.29784	9.02671	9.47441	9.11761	8.23613	8.2853	5.68907	6.45257	8.08132	7.33863	7.50832	8.4187	10.233	10.3143	10.1028	9.41012	10.471
Os04g0590800	Hypothetical protein.	helix-loop-helix DNA-binding protein, putative	3.88891	3.35398	3.55751	3.87293	3.94479	4.00837	0.793024	3.90141	2.41396	3.17238	2.31357	3.73372	3.95177	3.58322	3.6459	4.12052	1.96302	2.64349	5.85622	4.75304	3.88249	6.02495	5.64741	5.63199	4.52284	4.9127	1.83848	3.08531	3.67048	3.24878	5.80833	5.80704	6.42106	6.41609	6.17426	4.93497	5.56321	5.23296	5.5693	4.30373	5.2316	5.00202	7.82593	6.61642	7.01997	3.79969	6.77803
Os04g0599900	ENTH1 protein (Fragment).	ENTH domain containing protein, expressed	8.60148	9.15313	8.63035	9.13733	9.52373	8.75448	9.39075	9.9781	9.62543	10.0822	10.6347	9.77364	9.66281	9.83029	9.36298	9.71379	10.1852	9.79898	10.6778	10.2173	10.6701	10.7454	11.1846	11.0526	9.35633	8.87312	8.92479	10.0204	10.6368	9.71567	11.202	11.3268	11.5293	11.1178	10.876	10.9817	10.8298	10.7708	11.0978	10.8732	10.796	11.0797	11.7068	12.5076	12.2201	10.9032	12.0872
Os04g0600400	Conserved hypothetical protein.	expressed protein	5.76358	5.11316	5.63985	6.01154	5.53927	5.76585	5.80093	5.50605	5.93343	5.25181	5.66129	5.16166	5.61896	5.67793	10.9717	5.88475	5.9368	7.88207	6.24482	5.87319	6.03886	6.72374	6.55932	6.67537	6.77577	6.75415	6.60172	6.65929	5.90335	6.30584	7.26607	6.97474	7.28642	7.83483	7.31424	7.51943	6.4285	6.55158	6.82384	6.75664	6.56515	7.07016	6.96378	7.31948	7.46017	7.5187	7.10602
Os04g0610400	Pathogenesis-related transcriptional factor and ERF domain containing protein.	AP2 domain containing protein, expressed	13.0845	14.1952	13.3874	13.2821	13.4302	12.8768	11.6972	12.1195	12.1297	11.8002	11.8844	11.563	13.0428	12.5888	12.5775	12.2148	12.2235	12.6408	12.1863	14.1215	13.2123	12.4496	11.7934	12.1891	12.0021	12.2096	12.5097	12.7445	12.4821	11.2289	13.0877	13.354	13.6032	13.0188	13.2779	13.5589	12.888	12.9465	13.5089	13.0357	12.5613	12.8217	12.8098	11.0999	10.8415	12.8032	11.1397
Os04g0616400	Receptor-like serine/threonine kinase.	SHR5-receptor-like kinase, putative, expressed	5.05562	4.81455	4.84891	5.14039	5.08591	4.49349	5.38806	4.57459	4.51166	4.99661	5.10284	4.85287	3.96432	3.76512	3.76651	4.42411	4.77372	3.93447	5.28799	5.13747	6.68293	5.43716	6.16563	6.49432	5.5215	5.6188	5.48112	4.82998	4.52126	5.11212	6.22025	5.99034	6.28096	6.17738	6.13217	6.31523	6.1591	6.6091	6.51518	6.9975	6.54065	6.75541	8.37732	7.70637	7.59374	7.35307	8.04427
Os04g0630300	Conserved hypothetical protein.	leucoanthocyanidin reductase, putative, expressed	3.51561	3.61862	6.08655	2.0894	0.878876	3.65506	4.67797	3.17279	2.45487	2.6055	2.2574	2.42101	1.90065	1.91282	2.33385	-0.477217	1.55582	0.721672	9.06781	3.30918	9.51305	4.90384	8.2179	7.15172	3.55906	4.4917	3.43913	2.7701	2.80678	5.72902	2.7113	2.75206	2.37772	2.06439	3.62564	1.45681	2.51547	2.54253	2.47743	3.469	2.99841	2.39182	8.2547	8.36252	8.81299	7.44028	9.0363
Os04g0649100	Conserved hypothetical protein.	AP2 domain containing protein, expressed	5.30231	4.92728	5.54964	7.03802	7.02553	6.84486	6.59735	5.94941	5.42212	5.81977	5.47674	5.32718	5.87969	6.16487	5.97817	6.08717	6.44528	6.84786	5.28006	5.20638	5.73416	6.01748	6.17304	6.34844	5.2425	5.02048	4.49403	4.64627	5.57567	4.52019	5.18276	4.79065	5.18496	5.53013	5.2431	7.36263	5.1121	5.17566	6.56952	5.35624	4.5845	4.58834	3.82471	4.62006	3.10499	5.4686	4.27141
Os04g0650300	Hypothetical protein.	glycosyltransferase family 43 protein, putative, expressed	8.94036	8.49076	10.0661	8.52811	8.2119	9.21485	8.18571	7.859	7.78414	8.96792	9.2912	9.01357	8.70538	8.05227	7.6507	7.61163	7.76174	7.73651	11.8464	10.1371	12.5032	11.0118	12.2843	12.2603	7.5223	7.47696	7.50099	8.38708	9.14325	9.03921	12.8125	12.455	12.6591	12.9865	12.3904	12.4086	10.9112	10.6858	11.6277	10.8896	10.4932	11.518	11.2631	13.047	13.5111	13.2522	13.1836
Os04g0662400	Auxin responsive SAUR protein family protein.	OsSAUR23 - Auxin-responsive SAUR gene family member	3.60853	3.85669	4.56551	2.6129	3.34654	3.74442	3.67656	3.21527	1.98741	3.84053	3.4491	3.8807	1.95546	3.20295	2.05486	2.96701	2.36368	3.74501	7.52463	6.57559	8.56701	5.82723	6.29488	5.7881	7.01768	7.00698	6.80406	5.03293	5.67005	5.8016	7.43231	7.65766	8.41094	7.65456	7.76765	7.62143	5.60816	5.41927	6.46736	6.35634	5.31344	6.5873	7.48532	8.59032	8.09089	9.24009	6.55148
Os04g0663700	TLDc domain containing protein.	TLD family protein, putative, expressed	7.50475	6.99844	7.56387	7.64528	7.67832	7.53472	7.15055	7.24433	7.03963	6.64532	6.82331	6.65793	7.62178	7.94446	7.66164	7.15899	7.05878	7.49492	6.71374	6.64028	6.46632	7.62925	7.37124	7.35916	7.33564	7.43622	7.53666	7.68528	7.55561	8.32936	7.01074	6.45814	6.80759	7.42366	6.65894	7.01696	4.99447	5.114	6.01919	5.76621	5.54445	5.84613	7.14947	7.87976	7.97923	8.08537	7.95893
Os04g0669200	Ethylene response factor 3.	AP2 domain containing protein, expressed	13.7591	14.208	13.8949	13.3131	13.6841	13.0259	13.2515	13.8353	13.8704	13.1292	13.3751	12.9512	13.8908	14.1974	14.0067	13.3821	13.5309	13.7771	12.8946	13.8719	13.6996	12.8091	12.4587	12.5447	12.8576	12.2212	12.5242	13.2123	13.3571	13.032	12.6059	12.8854	13.1902	12.2433	12.4043	12.7144	12.4641	12.6479	13.195	12.4314	12.5771	12.5932	13.6625	12.2725	12.3512	13.5137	12.3024
Os04g0678300	WD40-like domain containing protein.	WD-40 repeat family protein, putative, expressed	8.16792	7.6712	8.26881	8.53027	8.06008	9.12986	6.99743	5.90476	5.65373	7.14758	6.64252	6.48562	3.77248	3.33445	3.49405	5.31557	5.09028	4.44622	8.05156	7.89715	8.3872	8.03123	8.15035	8.55038	6.53228	6.29137	6.63046	6.45899	6.63425	6.32102	8.42823	8.04726	8.42833	8.59866	7.81925	8.10493	6.42189	6.54811	7.39624	7.70299	7.06252	7.28295	9.21881	9.08295	9.02198	8.47068	9.48403
Os04g0684900	Ribonuclease CAF1 family protein.	CAF1 family ribonuclease containing protein, putative, expressed	7.28115	7.05909	8.89506	9.26352	8.25727	8.18225	9.11101	8.17216	7.86947	11.881	10.3587	10.1798	8.75275	7.58118	6.57407	10.4702	10.212	10.4638	9.59964	12.1501	11.4064	8.58594	7.77738	7.73048	9.0461	8.55356	8.59344	11.1303	10.2111	8.45164	10.7294	9.85622	10.8808	10.9112	10.2719	9.8279	9.28149	9.51704	10.7708	10.3408	9.3953	9.86014	8.97212	6.23009	5.99856	8.17743	6.36303
Os04g0685200	Peptidase aspartic family protein.	Eukaryotic aspartyl protease domain containing protein, expressed	10.4589	10.3514	11.3651	8.79514	8.19735	11.0418	8.114	8.09761	7.98394	6.62777	6.59533	6.7124	7.72209	7.62806	7.54634	6.46453	6.04525	7.25468	12.319	12.4962	11.0537	13.464	13.0185	12.9877	5.64302	6.20486	6.7197	4.57635	6.85421	6.73766	10.6384	10.4768	10.4832	10.4307	10.2585	10.4034	9.1513	8.94321	9.86836	8.8229	8.86594	9.69518	14.7824	14.2496	14.6929	12.0552	14.0363
Os04g0685300	Harpin-induced 1 domain containing protein.	harpin-induced protein 1 domain containing protein, expressed	9.45837	9.71733	9.94787	9.90929	9.92977	9.97452	8.71843	8.66187	8.44762	10.8416	10.9328	10.2264	9.83691	9.40266	9.63655	10.0901	10.7448	10.843	10.4985	11.5317	11.7076	11.3652	11.4619	11.482	9.4769	9.01293	10.5119	10.7962	11.3945	10.8433	11.8035	11.895	12.1714	11.8715	11.9375	11.9185	11.3338	11.2903	11.6579	11.8776	11.4512	11.6272	11.9447	12.1063	12.2448	12.5901	12.1429
Os04g0685900	Receptor-like protein kinase-like protein (Fragment).	receptor protein kinase TMK1 precursor, putative, expressed	7.37148	6.93903	7.28317	7.83068	7.64096	7.21063	7.45131	7.32863	6.80639	7.72402	7.5004	6.571	6.2106	6.28234	6.35392	5.97005	6.60068	7.34964	7.52791	6.89741	8.57381	7.72526	8.5007	8.99441	5.55401	5.50123	5.22672	6.28801	7.7638	6.26482	9.04449	8.69248	9.15394	9.0018	8.31516	8.55767	7.90733	7.33205	8.17392	8.25911	7.64288	7.94558	8.4782	9.26472	9.42193	8.77637	9.60432
Os04g0687200	Conserved hypothetical protein.	hypothetical protein	2.12313	4.63232	3.39509	4.56174	4.95279	4.80159	4.36738	4.76739	4.31963	6.14786	6.45773	6.52996	3.55919	3.57677	3.44784	4.82954	5.34495	4.92189	9.33002	8.58034	8.63079	9.85179	9.93636	9.75505	5.43072	4.57466	6.13265	7.29288	8.3645	8.14251	8.18203	7.79624	8.14371	8.33599	7.93219	8.00281	5.33221	6.31915	7.28053	6.859	6.93405	7.64246	11.0694	9.69577	10.2841	7.81007	11.321
Os04g0689400	Protein kinase domain containing protein.	protein kinase domain containing protein, expressed	3.43866	3.31206	4.43553	3.5083	3.72682	4.20733	3.10216	2.91211	3.44693	3.07357	3.69705	3.36495	2.07993	2.4948	2.59141	1.39774	2.83648	2.48004	9.30962	8.87537	8.46093	10.0294	10.0183	9.69184	5.64985	4.18416	5.23798	5.50297	6.20129	5.63026	7.71151	8.13043	7.59387	8.09841	8.11604	7.43758	6.96107	6.80486	6.75744	6.7184	6.8716	7.51747	11.9163	11.349	11.2509	8.16174	11.4016
Os04g0692000	Protein of unknown function DUF6 domain containing protein.	phosphate/phosphate translocator, putative, expressed	10.3166	10.3327	10.1453	10.667	10.8946	10.4444	10.748	10.8837	10.4453	11.1544	11.5074	10.7516	10.0933	10.4445	10.1642	10.4136	11.005	10.343	11.2648	11.267	11.4364	11.4595	11.6781	11.8824	10.893	10.5577	11.5978	11.4935	11.6439	11.3391	11.6375	11.6797	11.9592	11.7073	11.0796	11.4837	10.8214	11.1938	11.5725	11.2734	11.3877	11.576	12.0886	12.4432	12.2288	12.1504	12.6117
Os05g0110000	Zn-finger, RING domain containing protein.	zinc finger, RING-type, putative, expressed	10.2432	10.3865	10.2788	10.3454	10.232	9.8157	10.2445	10.5463	10.5567	11.2036	11.1499	10.8322	10.7543	10.9126	10.2598	10.8421	11.2198	11.3455	10.4235	11.38	10.743	10.9662	10.9724	10.8071	10.214	9.78002	10.1607	11.3147	11.1812	10.082	11.418	11.3362	11.4881	11.4683	11.4546	11.3651	10.9657	11.1678	11.5071	11.4444	11.1787	11.2559	11.1294	10.944	10.9292	10.4226	10.8821
Os05g0114000	PRLI-interacting factor F (Fragment).	soluble inorganic pyrophosphatase, putative, expressed	14.4333	14.3988	14.8205	12.7664	12.4169	14.1195	11.6105	10.3992	10.092	9.5637	8.9103	9.04858	10.1319	10.5565	10.4306	10.0358	9.665	9.90874	13.5707	13.1895	13.9636	11.3246	12.5483	13.2234	7.65897	6.95041	7.52272	8.16782	8.79238	8.83324	12.9997	12.7924	12.9905	13.4933	13.2757	13.2335	10.5045	10.3347	11.373	11.2379	10.7785	11.4222	11.222	12.8572	12.3975	14.1703	13.3393
Os05g0138000	Conserved hypothetical protein.	expressed protein	3.16623	1.75494	2.40764	3.23159	2.75938	4.87504	3.02479	3.25775	2.47583	3.92722	2.84758	2.27027	4.08437	2.82342	3.958	2.78812	2.85094	2.84793	6.42762	3.90567	5.32952	5.37212	5.47722	5.28138	-1.61941	3.74205	4.31036	2.40094	2.09447	3.75786	7.92692	8.16508	8.67744	8.1845	7.89758	8.23678	5.35256	6.22274	7.00948	6.80353	6.35592	7.29676	7.62922	6.06426	5.62069	4.6344	6.71907
Os05g0140500	RNA binding motif protein 8 family protein.	RNA recognition motif containing protein, putative, expressed	11.8189	11.9078	11.9171	11.3377	11.6189	11.4886	11.5919	11.8514	11.9685	11.0525	11.4642	11.3667	11.5255	12.285	12.041	10.9936	11.4177	11.6881	12.2824	11.9393	11.6388	12.2948	11.9267	12.2772	11.746	11.2403	11.6887	12.1023	11.8106	11.6184	10.9161	11.1221	11.5428	11.1603	11.2894	11.5996	10.5935	11.4147	11.5019	11.5691	11.4425	11.6289	12.3939	12.2197	12.17	11.2718	12.1974
Os05g0155000	Protein MFP-b.	3-hydroxyacyl-CoA dehydrogenase, putative, expressed	6.31296	6.59445	6.17916	6.79929	7.62174	6.87629	7.72701	7.74115	7.88583	8.04808	8.24507	8.05095	7.45751	7.56113	7.50872	8.46966	8.93473	8.76941	8.01328	7.56455	8.24748	7.96351	8.1807	8.70209	7.68136	7.42801	8.31199	7.73244	8.20089	8.07028	6.73357	6.78546	7.32827	7.1743	6.73474	7.32082	7.32732	7.23451	8.034	7.31093	7.43489	8.19969	9.4365	9.60028	9.58783	9.48865	9.58654
Os05g0159100	Eukaryotic protein of unknown function DUF846 family protein.	expressed protein	5.72932	5.8518	6.5071	6.2605	6.39714	5.96209	6.47532	6.60276	6.4188	6.24815	6.63801	6.45931	6.39216	6.68512	6.17094	6.09318	6.58563	5.99032	7.39659	6.62083	7.15003	7.18965	7.23799	7.24562	6.2781	5.23081	6.26188	6.23732	6.30319	5.59355	7.47374	7.46045	7.7708	7.89762	7.72051	7.59661	5.99264	6.31903	7.07493	6.77384	6.56782	7.00524	7.48426	8.47259	8.2104	8.11701	7.96999
Os05g0168400	Conserved hypothetical protein.	expressed protein	9.96485	10.0697	9.41522	9.75962	9.73276	9.14365	9.8405	9.85136	9.72804	9.78794	9.96378	9.44548	9.88967	9.9311	9.52762	10.0068	9.91847	10.0696	9.92317	10.2555	9.83697	10.5105	10.3955	10.3361	9.80216	9.25285	9.61403	10.3919	10.4766	9.73198	10.233	9.99099	10.1335	10.5832	9.96369	10.302	9.6945	9.81224	10.102	8.91797	10.2599	10.2884	10.6557	11.0289	10.7883	11.0376	10.8163
Os05g0188300	Conserved hypothetical protein.	GA11916-PA, putative, expressed	4.4123	4.60936	4.54178	4.78247	4.83931	4.28099	8.06789	7.67557	7.60916	7.14415	7.0809	6.88186	6.26171	6.52313	5.94536	6.30909	6.41761	5.97692	7.11695	7.42899	6.6416	7.76929	7.23824	7.19571	8.86533	8.15701	8.4848	8.60836	7.92979	7.72813	7.47177	7.30377	7.45042	7.21212	6.94414	6.65957	6.14319	6.83939	7.34949	7.02501	7.17477	7.24635	8.19496	8.09929	7.8984	7.44941	8.23145
Os05g0189300	Acid phosphatase (Class B) family protein.	HAD superfamily phosphatase, putative, expressed	3.19399	2.68362	5.39744	3.0695	3.09669	2.99896	1.73779	1.91593	0.00280839	2.70222	2.26961	2.74176	1.95294	2.90542	2.58377	1.92852	2.30853	2.64153	11.531	8.23015	12.5195	9.4664	11.5247	11.5427	4.68446	5.16891	-2.50199	2.42857	2.43821	0.563873	2.63691	3.47122	0.936015	2.89059	4.60667	2.63915	4.04997	3.97022	0.479463	2.58305	3.42301	0.956732	5.89528	9.59598	9.31648	9.02	8.945
Os05g0190500	Acid phosphatase (Class B) family protein.	HAD superfamily phosphatase, putative, expressed	2.93626	1.45544	5.02577	2.65638	2.04886	1.06737	2.77575	2.53841	0.787567	2.13924	2.60087	2.46285	2.32204	2.35883	4.57117	2.98624	2.25497	1.71741	13.1942	9.02017	14.4127	11.1979	13.2469	13.6076	3.38008	4.72096	2.07599	3.06063	1.46023	-1.7595	2.03225	2.21438	1.60607	1.29876	3.14435	2.64085	3.09259	0.808376	2.29857	2.36781	2.46858	1.10438	8.12037	11.8191	12.1066	11.7013	11.2741
Os05g0199500	Glycosyl transferase, family 31 protein.	galactosyltransferase family protein, putative, expressed	3.63563	2.19106	2.25272	2.24274	2.02127	0.657436	5.66868	3.26374	2.84791	3.67574	2.87072	2.4016	0.465965	4.6048	3.07792	1.31332	2.3138	2.50771	3.60141	2.75452	2.55855	4.97884	3.94887	3.87199	3.86341	1.51322	7.03527	-0.181059	1.77315	-1.81051	4.07318	4.08855	3.96554	3.96554	4.37225	3.47743	4.74975	1.92066	2.89041	4.20153	2.52819	2.70736	5.1734	5.47851	4.6584	3.61131	4.46707
Os05g0214900	Conserved hypothetical protein.	expressed protein	9.01808	8.44025	9.06457	9.47085	9.07596	9.22778	9.51934	8.95638	9.36381	9.42151	9.68347	9.73769	9.24261	8.70777	8.65391	10.1452	9.20716	9.40173	10.7894	10.7728	10.1908	10.6782	10.3601	10.3228	10.1253	9.68848	10.8101	11.6447	11.4413	11.0962	9.57883	9.60562	10.0242	9.74048	9.48525	9.57398	8.05357	8.15086	8.87317	6.06256	8.79273	9.32374	11.3719	11.2704	11.2259	11.4982	10.964
Os05g0244500	Glycoside hydrolase, family 5 protein.	cellulase, putative, expressed	9.40732	8.93429	10.0482	8.98201	9.20923	9.31345	8.46288	8.00177	8.10487	5.82888	6.22498	5.58786	6.78285	6.26469	6.34625	7.06409	6.76674	6.48617	10.8016	10.229	11.4534	11.3248	11.779	11.2505	7.15633	6.34604	7.27622	5.77973	6.89819	6.24276	7.73783	7.08761	7.57866	8.94655	7.21228	7.68471	7.64738	7.99782	8.87605	7.38524	7.85932	8.26299	11.2152	12.0146	12.1163	9.06868	12.2177
Os05g0252100	Protein of unknown function DUF620 family protein.	expressed protein	5.39244	4.19807	6.71646	2.0585	2.88573	7.25748	4.99832	5.64358	5.85794	4.24722	3.72077	4.40908	3.33078	4.77062	4.27214	0.414504	3.55156	2.33773	7.50897	7.00733	7.73621	6.91452	8.07496	8.49704	3.35776	3.42698	1.97215	2.21372	3.57817	3.88123	9.73034	9.95731	10.7953	10.4001	10.1885	10.4552	7.41548	7.03072	9.07285	6.91993	7.93603	8.11587	8.56061	8.40063	8.81909	6.7451	8.75441
Os05g0273800	Soluble epoxide hydrolase.	hydrolase, alpha/beta fold family domain containing protein, expressed	11.821	11.5773	12.413	11.6185	11.3886	11.4413	12.0845	12.0883	12.1289	10.9914	11.1558	11.0583	11.5853	11.2851	11.3047	11.8619	11.5674	11.9248	13.2035	12.7309	12.374	12.3319	12.339	12.3974	10.631	10.2443	10.4302	11.8735	11.9848	11.3867	11.8172	11.5997	12.1308	12.1482	11.5348	12.2873	8.35351	8.92982	10.0818	10.1733	9.51332	10.6569	13.7012	13.55	13.7631	12.8267	13.7036
Os05g0277500	Rhicadhesin receptor precursor (Germin-like protein).	Cupin domain containing protein, expressed	6.12992	4.859	7.51385	3.09901	2.06709	5.29856	0.594431	3.99228	3.3574	1.85874	2.21403	2.621	1.72665	3.04319	2.33407	1.12286	2.39897	1.09401	10.5873	9.86283	10.0905	11.0608	11.046	10.7568	3.94701	3.34344	3.71056	1.84748	2.34633	2.50478	10.7291	10.4316	9.99662	10.7145	10.0617	9.98052	8.34804	7.91956	8.81728	7.96879	8.34007	8.4265	10.0784	10.9529	10.9006	10.2361	11.3323
Os05g0303300	(No Hit)	No Hit	5.7385	6.39385	6.22364	7.09453	6.4308	7.2593	6.83262	8.12427	7.39049	6.26051	4.91864	6.53678	6.38017	4.58523	6.15417	6.81194	7.44698	5.60323	4.22756	4.68469	5.67716	4.57796	4.58505	6.00698	5.44129	6.73522	6.13977	4.82288	4.10893	5.4824	5.7798	6.00595	5.45205	5.78578	6.50133	6.94092	8.93617	7.03175	6.09308	6.66881	6.862	5.56819	6.58033	4.86082	4.68661	5.68027	4.577
Os05g0319700	Protein kinase-like protein (Fragment).	STRUBBELIG-RECEPTOR FAMILY 6 precursor, putative, expressed	4.44645	3.54567	6.14938	2.99665	3.292	5.83956	2.8232	3.39706	1.69382	1.25492	2.28448	1.67999	2.3531	3.49785	1.22984	2.04499	2.20744	3.52374	7.72185	6.07848	7.36682	6.72821	7.49389	8.16231	2.58843	5.08993	4.50712	3.10949	3.86896	5.92705	9.42686	8.82207	9.46361	9.41809	8.72872	8.73217	6.50711	6.94257	8.7348	7.66005	7.4603	8.56377	7.83834	9.33711	8.79292	10.8595	9.04129
Os05g0324600	Uncharacterized plant-specific domain containing protein.	DUF623 domain containing protein, expressed	1.42866	2.50486	3.44885	2.24968	1.84014	3.88269	3.26047	2.29503	3.58209	2.00477	2.11198	2.47507	1.99109	0.305268	2.44635	2.16882	0.970703	2.0459	4.67535	3.1808	4.39635	3.51743	3.47136	3.93058	4.24966	3.72217	3.08883	3.88127	2.62844	4.20259	7.80915	7.29444	8.00138	7.86671	7.67801	7.46246	4.62881	5.09073	6.36536	6.79108	5.79429	6.73434	5.05602	4.65343	4.76185	4.14406	4.64688
Os05g0341300	Guanine nucleotide-binding protein alpha-1 subunit (GP-alpha-1).	expressed protein	6.73773	6.88106	6.23356	7.24039	7.28218	6.81194	6.81927	6.39865	5.90688	5.79707	6.30311	5.46207	5.33863	5.66685	5.59845	5.52628	6.02769	4.68334	5.91374	5.14869	5.77377	5.98989	6.72161	6.71224	3.97085	4.98432	5.69011	4.60476	5.63351	5.20488	5.68529	5.37643	5.45193	5.91494	5.13719	5.20277	5.09667	4.57348	4.94817	4.59636	4.84825	5.03914	7.50386	7.34623	6.95314	7.06631	7.93048
Os05g0354400	Protein of unknown function DUF231 domain containing protein.	leaf senescence related protein, putative, expressed	10.4963	10.0023	10.517	11.0996	11.063	10.9698	10.5532	10.4289	10.3553	11.1084	10.6515	10.8525	10.1812	10.6582	10.5929	10.7146	10.9041	11.1888	11.26	10.3673	11.3067	11.2038	11.5041	11.8591	10.2387	9.92038	10.0263	11.0476	10.861	11.0006	11.1352	10.5217	11.1953	11.4374	10.6368	10.9521	9.33822	9.38722	10.2743	10.2588	9.67519	10.2581	11.3257	11.54	11.9056	11.7514	12.026
Os05g0363500	ARM repeat fold domain containing protein.	WD domain, G-beta repeat domain containing protein, expressed	2.70221	3.20845	2.3627	4.29088	4.1224	5.5235	4.4684	5.43786	4.86857	5.06808	5.30728	5.18854	2.67306	3.52966	0.538577	5.79893	5.8255	5.31707	9.27875	7.71885	10.6049	9.54469	10.8309	10.6032	5.98264	6.36372	5.29718	6.55752	7.91716	8.59344	10.0658	9.50445	10.5162	9.95596	8.70614	9.43048	7.29096	7.84989	9.29139	8.97933	8.10844	9.79061	9.17138	10.7906	10.7652	10.1055	10.9599
Os05g0369100	(No Hit)	leucine zipper protein-like, putative	3.43288	3.60776	3.54996	3.45725	3.68618	3.15454	7.82851	3.53578	3.60587	3.86622	3.3712	4.25322	4.23529	3.31532	3.4546	4.25987	3.53417	3.67036	5.19962	5.46286	4.85734	5.24097	5.31512	5.29783	6.04396	5.87313	5.07025	5.46472	5.36697	5.34404	7.46263	7.13969	7.31318	7.5531	7.20008	7.40571	6.56285	6.34739	6.91226	7.30362	6.3634	7.10977	6.28225	6.96886	7.00569	6.24291	6.9386
Os05g0369300	Conserved hypothetical protein.	leucine zipper protein-like, putative, expressed	2.67002	3.64195	4.44401	3.74955	3.18355	3.55136	4.2461	3.42949	4.25527	4.41334	4.04455	4.15101	3.76269	3.09166	2.79404	3.92048	3.83476	3.14808	5.44818	5.73629	4.55346	5.74294	5.53919	5.37819	5.83954	5.77855	5.66706	5.82236	5.73529	5.94589	7.41757	7.34318	7.3387	7.63108	7.26853	7.242	6.1404	6.49302	7.00821	6.80046	6.48753	7.2248	6.69598	7.0992	7.10729	6.37516	7.0771
Os05g0369700	Conserved hypothetical protein.	leucine zipper protein-like, putative, expressed	3.24756	2.71131	2.28471	2.27125	3.25195	2.46749	2.15974	3.20852	2.24699	1.90406	2.0828	2.45018	4.3154	1.75644	0.787112	2.76225	1.74938	1.14526	2.99674	0.951705	1.1235	1.6567	2.06075	1.42745	-1.06881	4.98671	5.47848	2.73623	3.3504	3.68002	2.67717	2.63787	2.84312	2.61702	2.87176	3.27209	5.32653	2.58452	3.20097	3.4157	3.63141	2.72259	2.64001	2.92397	2.48297	1.69976	2.31389
Os05g0398800	Protein kinase domain containing protein.	serine/threonine-protein kinase, putative, expressed	8.35166	7.50543	8.94623	7.74227	7.74979	9.32324	5.64303	5.3722	5.21577	6.45072	5.96834	5.95846	2.96937	3.3345	2.13177	4.26778	4.31112	4.34802	10.7833	9.2853	11.3722	11.0036	12.0943	11.9387	3.61217	4.57632	6.70526	5.03502	5.39671	5.08405	8.30009	8.16892	8.81944	8.06293	7.37269	7.72296	5.7221	6.22491	7.60536	6.97059	6.65701	7.84993	10.0663	10.876	11.0035	5.6926	10.9048
Os05g0406600	(No Hit)	hypothetical protein	2.66366	2.71742	3.2665	3.21503	3.29731	4.13373	4.27785	2.57483	1.62768	3.99071	3.57102	4.30952	2.178	2.35731	6.41554	3.25319	2.9297	3.17602	4.47867	3.33568	4.17726	4.84448	5.00825	5.15748	7.6643	4.31656	3.58049	2.78698	2.77416	3.76199	3.85019	4.02284	3.80596	4.26744	4.41021	3.98807	3.5733	3.45416	3.07828	2.8919	3.59168	3.21123	5.7	5.18809	4.5043	4.11634	5.56391
Os05g0406700	Hypothetical protein.	hypothetical protein	4.86881	4.26016	5.34008	5.34082	5.02391	5.60188	5.62231	4.82739	5.04049	6.11622	5.89039	6.56548	3.71012	4.1409	4.87071	4.31383	4.83638	4.71378	5.14622	3.96163	5.79029	5.21976	5.92661	5.89213	3.68648	5.06549	3.52074	4.99153	4.7843	4.91269	5.75136	5.50584	5.46977	6.01589	5.85984	6.13116	5.71009	6.67882	6.222	7.42251	7.24661	6.30888	6.02819	6.05327	6.0323	7.72942	6.77019
Os05g0406800	Leucine-rich repeat, plant specific containing protein.	receptor-like protein kinase precursor, putative, expressed	3.18795	2.22973	2.11444	2.79191	2.85002	4.30162	3.89	2.0973	0.336851	3.49102	3.06366	3.79518	3.74142	3.09218	2.54058	2.98576	2.15715	1.19612	10.0422	8.96924	10.0827	10.9742	11.4309	11.1185	3.97309	5.58533	3.99456	2.8276	3.49969	4.69439	9.0935	8.64912	8.83076	9.2037	8.90437	8.29719	6.71433	6.59567	7.66799	7.13834	7.6999	7.64171	10.6469	11.0881	11.1562	7.75254	10.8511
Os05g0414800	Non-protein coding transcript, unclassifiable transcript.	No Hit	5.2909	4.57081	5.242	5.66917	5.95212	5.65934	6.02735	6.30208	6.58228	6.99132	7.16283	7.26814	7.41238	7.1641	6.64594	6.66173	6.82692	6.59998	7.70658	7.20974	6.81287	7.41362	7.38911	6.80545	7.27192	6.18599	7.08187	7.31478	6.64694	5.90795	6.00574	6.47394	6.54791	5.70709	5.79835	5.4897	6.29792	6.56749	6.62667	6.01506	5.88748	6.70336	8.12729	7.52759	7.76455	6.62644	7.085
Os05g0429100	Conserved hypothetical protein.	expressed protein	12.8703	13.2872	12.9125	12.9211	13.3953	13.2563	12.7269	13.3633	13.205	13.4448	13.9854	13.9281	13.005	13.611	13.2114	13.558	13.4614	13.8398	14.1129	13.7398	13.7121	14.4468	14.4041	14.3218	13.4916	13.0849	13.0043	14.5299	14.8283	14.005	13.8545	14.3077	14.4031	13.8904	14.1479	14.2251	13.9755	13.7021	14.265	14.0241	13.8607	14.2933	14.9157	15.0368	15.142	15.5607	15.0284
Os05g0429900	Y49 protein (Myb DNA-binding protein) (MYB transcription factor).	MYB family transcription factor, putative, expressed	8.65694	8.2352	7.63465	9.23748	9.11189	9.73547	8.11339	7.93996	7.55048	11.095	11.0061	10.5398	7.00493	7.46577	6.94099	9.13092	8.74903	8.6474	9.87152	9.35494	10.6122	9.97007	10.5371	10.7596	8.44028	8.63852	8.62706	8.87106	9.81025	8.54038	10.5111	10.2251	11.3158	10.7298	10.5592	10.5039	8.80383	8.48722	10.06	8.97246	9.15599	9.77382	7.44881	11.0375	11.6082	11.8914	11.6455
Os05g0440000	Zn-finger, Dof type domain containing protein.	dof zinc finger domain containing protein, putative	3.27086	3.12103	3.57566	3.38923	2.83731	2.89488	3.87944	3.85668	4.16808	3.34718	3.50137	4.62014	3.00523	3.72565	3.22306	3.51674	2.72042	3.95683	8.81358	6.63039	8.29128	7.48266	8.16816	8.55526	5.44628	5.76022	4.67364	5.08151	5.98997	6.34458	5.42788	5.80573	5.44579	4.99991	6.04797	4.95467	5.42213	5.99431	4.65494	2.96725	5.676	5.35157	8.43935	9.62979	9.93684	8.18861	9.66723
Os05g0443800	Plastid division protein FtsZ (Putative plastid division FtsZ protein) (Chloroplast division protein AtFtsZ2-1).	tubulin/FtsZ domain containing protein, putative, expressed	5.44407	6.00379	4.74046	5.93138	6.31221	4.94442	6.13461	5.9486	6.01092	6.26983	6.03347	5.86936	6.6715	6.33828	6.45044	6.8321	6.85566	6.94064	11.0701	10.3767	9.52647	11.2183	11.058	10.8467	5.58802	6.19063	6.37238	6.2455	5.50029	5.82383	9.22467	9.50098	9.07654	9.48137	9.12404	8.5256	7.5024	7.62857	7.80649	7.92259	7.81579	8.04544	12.5193	11.4754	11.4536	7.79638	11.5087
Os05g0449200	Transferase family protein.	No Hit	8.97293	8.29208	9.28172	6.97414	7.11893	7.52602	9.184	9.58353	9.8256	7.16027	7.28134	7.36459	8.72259	8.83204	8.65246	6.08897	6.05321	6.85204	7.23304	6.65851	7.36301	8.13818	8.39636	8.25093	9.50528	7.90796	8.95925	5.72117	6.28782	6.05015	3.97699	4.07787	4.72407	5.53059	4.7218	4.99289	5.06116	3.46982	5.14306	3.89723	3.40486	4.32864	10.3065	9.49517	9.65975	6.54114	9.92817
Os05g0449900	Myb, DNA-binding domain containing protein.	MYB family transcription factor, putative, expressed	10.6278	11.1041	10.0097	9.69803	9.9249	9.46597	9.8909	10.18	10.0861	9.26599	8.98604	8.81517	9.59544	9.90992	9.52453	9.22814	9.10674	9.93855	8.86664	9.33892	8.81031	9.28688	9.33623	8.76762	9.01434	8.34123	9.15128	9.06302	9.27089	10.0401	7.94589	7.54433	7.85216	8.55427	8.00979	8.35006	7.83604	7.93012	7.63493	8.0871	7.85619	7.96132	8.95558	8.95276	9.06367	11.6305	9.81281
Os05g0454200	Protein of unknown function DUF315 domain containing protein.	ATROPGEF7/ROPGEF7, putative, expressed	2.69336	2.72535	3.18608	2.97123	2.28253	3.58265	2.44251	1.86314	1.92238	1.79905	1.93899	2.41907	1.69401	2.67905	2.21632	2.85246	1.66696	2.90118	13.3762	10.9149	13.8445	13.3584	14.0818	13.9643	4.59571	3.53232	1.80122	2.6461	2.16648	4.09467	10.717	10.476	10.3791	10.5719	10.3067	9.51383	8.49748	8.229	9.18409	8.56978	8.81789	9.06671	11.4738	12.8716	13.1201	3.00697	12.3608
Os05g0478000	Zn-finger, RING domain containing protein.	RING-H2 finger protein, putative, expressed	9.51326	9.49167	8.66156	6.9653	6.95453	7.06965	7.40379	7.24263	7.17489	6.80281	7.1681	7.09515	6.04616	6.76242	6.53719	5.33325	5.41694	4.54228	9.38184	7.68199	9.79932	8.0732	9.26169	9.28935	7.95019	7.77978	8.46109	7.58293	8.25138	8.39282	6.80855	6.72015	7.03637	7.14549	6.76968	6.86537	5.86953	5.26438	6.58984	5.65564	5.86053	6.32878	3.55063	9.16026	9.87395	10.591	9.84612
Os05g0478200	Conserved hypothetical protein.	expressed protein	9.26769	9.20541	8.85086	9.46747	9.39778	8.99663	9.71358	9.47221	9.51426	10.325	10.1806	9.62887	9.97302	9.89665	9.70184	9.67421	10.0624	9.48357	9.50148	9.5843	9.93997	9.6355	9.88778	10.1282	9.16977	8.61524	9.15784	9.20323	9.46674	9.04162	10.5903	10.1859	10.5978	10.6409	9.79814	10.1198	9.26558	9.39482	10.2384	9.89584	9.40868	10.2429	9.87559	10.733	10.7958	10.5249	10.5573
Os05g0497300	Ethylene responsive element binding factor 5 (AtERF5).	AP2 domain containing protein, expressed	11.717	12.2364	12.7892	11.2744	11.0096	11.5593	11.4994	12.101	12.3907	12.0287	12.4819	12.319	12.4987	12.1585	11.6696	11.7112	11.1143	11.2433	11.9184	13.0717	12.4164	12.3792	12.0451	11.9694	12.5445	12.1875	12.6971	13.284	12.9856	12.5274	11.7936	11.8771	12.488	12.1474	11.8338	12.8386	12.2447	12.6833	13.1267	12.9411	12.4922	12.7143	12.7516	11.4975	11.8429	12.4045	11.9701
Os05g0502200	Phospholipid/glycerol acyltransferase family protein.	acyltransferase, putative, expressed	6.68817	6.28328	6.10155	6.43253	6.37879	5.53013	5.3634	5.93179	5.88826	5.16624	5.10707	4.90357	8.04803	7.54629	7.44479	7.57208	7.4904	7.98597	8.53924	7.8908	8.14004	8.75972	9.14036	9.13866	6.44325	6.46505	6.03022	5.61912	5.76998	5.69628	6.84311	6.33732	6.34101	6.942	6.23594	5.99943	5.53715	5.74504	5.8102	5.94098	5.2763	5.55045	10.7238	10.3591	10.6959	7.72603	10.2214
Os05g0507200	60S ribosomal protein L38.	No Hit	3.98593	5.02456	4.32276	4.83667	5.25741	4.07037	6.13401	6.99073	5.88784	6.15066	7.412	5.67532	7.30392	6.8668	6.72134	6.95103	7.09868	6.871	6.15993	5.52467	5.56902	6.17519	6.1272	6.89869	5.57844	4.90931	4.93048	5.26185	5.86653	4.01841	5.41532	5.79305	5.56073	5.79138	6.01584	4.95003	5.53682	5.68376	4.23773	4.23588	5.6575	4.53037	6.83009	8.16324	8.32537	4.81616	8.13959
Os05g0516700	Conserved hypothetical protein.	expressed protein	6.14107	6.14012	7.93441	6.44207	5.98837	6.77528	6.4793	4.84167	5.18211	5.49045	6.4406	6.50437	3.85541	4.22094	4.09681	4.2719	4.10886	4.63418	8.11404	8.07827	9.51414	7.97764	6.62405	8.02596	7.3377	6.59473	7.95345	7.44842	7.68651	7.40338	7.99296	8.60732	9.57375	8.13388	7.32673	8.16012	6.68323	6.98367	8.26685	6.26919	6.66564	7.13419	5.5123	6.0546	7.23796	9.91275	7.44034
Os05g0521800	BED finger domain containing protein.	No Hit	6.72863	7.13431	7.63871	7.14225	7.1385	7.74829	6.62514	6.91173	7.2372	6.65074	7.09872	8.0706	6.64426	6.66373	7.44563	6.4608	6.75903	7.52497	6.73262	5.52339	6.73663	6.05066	6.02453	6.54253	6.50178	6.85024	5.76978	6.34888	6.58392	7.29401	5.84048	7.09455	6.64043	5.98494	6.08904	6.28671	9.65559	7.54055	6.57674	7.77444	7.23209	6.87489	7.25436	5.82465	6.43615	8.25194	6.23446
Os05g0523300	AUX/IAA protein family protein.	OsIAA18 - Auxin-responsive Aux/IAA gene family member, expressed	5.0552	4.30227	5.08215	7.28424	7.15776	7.82447	4.00362	3.12689	2.95822	5.20985	4.95346	5.05282	3.06744	2.76799	3.81418	6.69782	6.34051	6.1628	7.34648	6.48823	6.89872	7.48727	7.50576	8.3296	5.25975	6.00954	5.77635	6.32579	6.25426	6.4942	5.65404	5.61421	5.6672	6.03532	5.71185	6.08974	4.93773	4.252	4.66618	5.14776	4.71742	5.0363	4.69194	5.63717	6.61717	7.19967	7.86458
Os05g0528000	RbohAOsp (Fragment).	respiratory burst oxidase, putative, expressed	9.00036	8.37635	9.97108	8.84822	8.50489	9.21492	8.85711	8.04092	7.98354	8.63236	8.5566	8.50238	7.82446	7.41603	6.82468	8.09761	8.37952	7.60495	9.85729	8.90127	9.99154	9.83806	10.5245	10.6293	8.83945	8.80849	8.95481	8.95464	9.15623	9.15034	10.8303	10.2987	10.8094	11.1508	10.2711	10.3381	8.91018	8.5288	9.73135	9.02271	9.05996	9.57625	10.6509	11.1898	11.0322	11.5618	11.3565
Os05g0541000	Conserved hypothetical protein.	No Hit	7.55257	7.45209	7.50307	4.8856	5.24085	5.64854	9.1424	9.2288	9.39895	6.35662	6.54331	7.46336	7.94875	8.53373	8.45758	6.63978	6.49113	7.11247	7.29364	7.18919	6.76953	6.21352	5.63237	5.66919	10.0951	9.63614	9.50894	8.43902	9.24158	9.62	5.11888	5.82047	5.62615	5.3811	5.76431	5.54051	5.27509	5.55233	5.74905	3.98865	5.17999	4.96844	3.05778	4.86459	2.71141	8.497	3.2198
Os05g0541100	IQ calmodulin-binding region domain containing protein.	IQ calmodulin-binding motif domain containing protein, expressed	7.28241	6.51893	7.42264	6.0784	6.02543	6.34983	5.53533	5.12859	4.97287	6.01099	5.06162	5.50913	4.51688	4.86136	5.16958	4.68533	5.03698	6.004	7.78714	7.71756	6.64285	7.11487	6.76362	7.61977	5.05456	4.76617	5.39483	6.45145	5.76344	5.80826	7.68464	7.23402	7.60373	7.91716	6.99548	6.97364	5.03249	5.08433	6.01617	6.29849	5.58799	6.48109	7.78063	6.03727	6.49221	5.55421	7.45635
Os05g0542300	Conserved hypothetical protein.	expressed protein	9.42561	8.79998	9.5578	8.86386	9.0627	9.78943	8.50594	8.12004	7.6463	7.83203	8.46355	8.34018	6.49256	5.53524	6.01024	4.83343	5.35621	3.42442	9.27441	9.8972	9.49034	9.94535	9.55578	9.43178	9.14761	8.84074	9.72462	9.19045	10.2243	9.19181	3.08224	4.04335	3.87329	3.29724	4.96373	4.08938	4.177	4.40847	2.81104	2.77883	4.14475	2.27821	10.3226	10.1793	11.5277	10.3151	10.9164
Os05g0542900	Glycoside hydrolase, family 28 protein.	polygalacturonase, putative, expressed	8.41118	8.40633	8.16415	9.91299	10.3543	9.77548	9.22303	9.30776	9.41856	9.78816	10.4724	10.0443	8.12807	9.20045	8.77214	10.0273	10.6084	9.66768	9.98705	10.4845	9.59724	11.6977	10.9138	10.907	10.4276	9.70199	10.5109	10.8281	11.6331	11.0357	9.10919	9.42133	9.31147	9.28834	9.66514	9.50395	8.05655	8.87387	8.84369	8.93807	9.43975	9.71566	10.7305	10.2715	10.3144	8.26384	11.2883
Os05g0545300	Protein kinase domain containing protein.	STE_MEKK_ste11_MAP3K	4.41681	5.08664	5.95027	5.56665	5.49124	6.91976	3.54663	3.19827	2.62863	4.49441	5.29916	4.69229	1.82069	2.88308	2.8703	1.74481	2.97645	2.66845	4.27962	5.1372	8.33479	5.54336	5.34576	5.33455	3.72585	5.1285	5.01678	4.14592	4.73374	4.60492	5.91885	6.22383	6.73935	6.25281	6.51019	6.11606	5.34916	5.31367	5.73261	5.40499	5.96119	5.13311	3.85632	3.5481	3.2647	5.40947	4.4363
Os05g0585400	Conserved hypothetical protein.	expressed protein	6.86269	5.92594	8.32547	7.02449	7.2583	8.5946	8.06092	7.28646	6.55172	7.6462	7.7313	7.69992	5.39341	5.91487	5.76077	6.66884	7.22356	6.33954	12.1099	10.5024	12.4824	11.4005	12.4442	12.6006	6.13026	5.06685	5.39737	6.52599	6.53543	6.57446	10.5774	10.4924	11.0129	10.4347	9.76513	10.029	9.0572	9.05885	9.69732	8.81546	9.15662	9.86476	11.7348	12.7733	12.8105	12.7987	12.4567
Os05g0590000	Peptidase A1, pepsin family protein.	aspartic proteinase, putative, expressed	5.20455	5.33273	6.00801	6.37034	6.51004	6.70624	4.47024	5.49789	4.51597	4.44132	5.02524	5.16359	5.64326	6.0073	5.89779	6.43508	6.40293	7.77341	10.1403	8.85195	10.451	11.042	11.3609	11.2097	3.99488	4.83122	5.71136	3.3416	4.23454	4.37562	6.12738	6.8679	6.59201	6.86686	7.10717	6.1323	4.94216	5.19662	4.7947	4.32636	5.56759	4.85853	10.2682	10.0571	10.3219	5.13439	9.99554
Os06g0104200	No apical meristem (NAM) protein domain containing protein.	NAC domain containing protein, putative, expressed	2.47665	1.20761	2.18841	1.38267	1.77973	0.880635	2.48256	2.65142	2.13132	2.08458	1.49585	1.4766	1.38206	3.06307	2.61905	3.16048	1.8964	1.56092	4.36864	2.91282	4.79102	4.19282	5.05763	4.5173	3.28812	4.07713	2.81736	1.13758	2.08072	1.36527	4.90177	4.81083	4.5	5.08637	4.40611	4.53692	2.87797	3.47278	4.45877	4.71515	3.98599	3.16312	4.49485	5.23598	6.87045	6.89747	6.49115
Os06g0106100	Cwf15/Cwc15 cell cycle control protein family protein.	CWC15 homolog A, putative, expressed	9.33721	9.25057	9.71361	10.0946	10.3726	10.392	9.90529	9.66105	9.47228	9.52506	9.76767	9.51441	9.12043	9.54198	9.03622	10.0884	10.1167	9.83042	9.99005	9.26542	9.28612	10.4804	10.2256	10.5842	9.85691	9.51434	10.1852	9.94576	9.96203	9.57669	9.38831	9.36659	9.75865	9.80989	9.65679	9.92078	8.33367	8.66205	9.04216	9.4907	8.97223	9.16327	8.75224	9.37602	9.05703	10.1251	9.57975
Os06g0121300	P-type trefoil domain containing protein.	expressed protein	0.830081	0.618006	3.71168	1.47712	1.34806	1.67732	2.02633	1.03631	2.56105	1.88318	0.91594	3.62289	2.4594	0.601344	0.0526183	1.24907	1.7046	1.40908	9.16273	8.38498	3.78499	9.90997	8.60177	8.16073	4.48127	4.79862	4.30533	1.82294	1.37059	4.28737	0.636	-0.103173	0.671068	0.150064	-0.278443	0.00136785	0.549113	-0.42221	1.13326	0.050811	-0.770178	1.43327	8.98592	6.26585	6.41451	3.11864	7.02885
Os06g0122600	(No Hit)	conserved hypothetical protein	7.33997	7.70095	6.28188	8.06328	7.54295	7.55725	7.92488	6.81184	7.15141	7.77728	7.32766	6.05816	5.7906	5.87337	6.16898	5.51737	7.54704	5.98219	6.15816	6.00581	6.96543	6.01091	6.90596	7.75169	4.10191	4.12891	6.09528	4.99401	5.08504	4.54927	7.05068	6.40562	7.08023	7.31813	5.30625	6.60877	6.11692	5.10456	6.33695	6.11083	5.48443	6.22525	8.74052	7.93569	8.2985	8.05691	9.10321
Os06g0127700	Oligopeptide transporter OPT superfamily protein.	oligopeptide transporter, putative, expressed	7.7555	7.45877	8.50392	7.66888	8.09451	8.32207	6.70654	6.33869	6.49371	6.32337	6.60223	6.34007	5.192	4.73409	4.84049	5.3252	5.6591	4.6751	6.75004	5.36087	5.82818	3.95029	5.19386	4.47333	3.6089	1.67315	5.17394	3.86578	3.94449	4.9272	7.84518	7.55159	7.61757	7.72474	7.30433	7.85305	5.76509	6.17111	6.22212	6.59572	5.97911	5.86991	4.35931	5.02499	4.55001	6.01623	4.15973
Os06g0133400	Conserved hypothetical protein.	expressed protein	8.94917	10.6857	10.6665	8.8549	8.831	9.22064	9.41587	9.47486	9.4101	9.58856	9.9912	9.9314	10.0969	10.336	10.2608	9.14997	9.22283	9.4644	9.23298	10.5158	10.5672	8.19648	7.31298	7.67764	11.5918	11.3718	12.3176	11.5292	10.3165	10.4571	9.3727	9.46788	10.3268	9.27478	9.49806	9.85275	9.67613	10.3875	11.0594	10.4639	10.3009	10.4813	11.7851	9.49344	8.3921	9.952	9.12352
Os06g0156600	Lipolytic enzyme, G-D-S-L family protein.	GDSL-like lipase/acylhydrolase, putative, expressed	8.52364	4.22528	11.2671	5.78568	5.03725	9.65036	6.725	3.21989	2.27212	2.73437	4.15008	3.64657	3.4357	3.31873	3.11027	3.2317	3.23309	2.33965	12.9939	10.3158	14.1367	12.0739	13.3655	13.9613	4.76244	6.14417	4.99936	4.81556	7.37264	8.84934	12.1025	11.26	11.6886	12.2785	11.3369	11.1533	9.114	9.32113	10.5585	10.7201	10.0835	10.3551	6.46119	13.4797	13.7063	13.247	13.3727
Os06g0183700	Hypothetical protein.	expressed protein	7.56725	8.3298	7.78234	6.12473	6.28991	6.50994	8.74464	8.1412	8.16485	6.64865	6.92946	6.97034	7.3697	7.56846	7.68405	6.63921	6.89722	6.27438	10.3529	9.51164	10.8772	9.11511	10.1909	10.6258	9.51132	9.09044	9.48634	8.78611	8.09065	8.37218	9.52842	9.35471	10.17	9.3226	8.92517	8.98854	7.31621	7.688	8.85118	8.20477	7.88654	8.76942	10.184	10.2055	10.2273	9.21282	10.2585
Os06g0184300	Peptidase C19, ubiquitin carboxyl-terminal hydrolase 2 family protein.	ubiquitin carboxyl-terminal hydrolase domain containing protein, expressed	12.4611	12.7453	11.8483	12.0405	12.4206	11.5065	12.7353	13.0967	12.5941	12.4795	12.8246	12.0939	12.887	13.2086	12.6985	12.4631	13.1792	12.3564	12.8411	13.3355	12.5025	13.0097	13.0832	13.2111	12.6752	11.5745	12.4015	12.2773	12.9562	12.4406	11.8617	11.951	11.7788	11.6892	11.1448	11.6021	12.3952	12.5125	12.4768	12.3159	12.5086	12.8315	14.8386	14.1257	14.4075	13.0247	14.6699
Os06g0211700	Xyloglucan fucosyltransferase family protein.	xyloglucan fucosyltransferase, putative, expressed	0.624055	4.76928	3.65448	1.75251	1.77742	2.44863	1.79054	1.85865	0.354826	2.83247	1.45783	4.0424	4.05055	3.12876	2.85076	3.79338	3.27197	8.4529	4.11882	3.68615	4.35162	4.06852	4.37629	4.97717	5.75276	6.35692	5.49787	4.49101	5.26895	5.05482	3.53658	4.05541	3.90142	3.50429	5.04918	4.33841	3.28824	3.9767	2.52889	0.982218	3.94979	2.24876	0.944067	3.15172	3.53413	4.30713	2.70043
Os06g0227300	Non-protein coding transcript, unclassifiable transcript.	No Hit	7.06245	5.86364	7.89287	6.97225	6.81564	7.92922	6.28947	5.36966	5.18472	6.19269	5.90003	5.89827	7.49467	3.18669	3.88824	5.37099	5.34006	5.33752	9.47438	9.07793	10.1599	9.96465	10.5382	10.7242	7.55614	7.5927	7.60226	7.597	8.34794	8.61949	10.1455	9.38226	9.73499	10.1075	8.9844	9.27902	7.09734	7.40927	8.50331	7.11227	7.7855	8.33984	10.2215	10.9896	11.1381	11.0376	11.1046
Os06g0233800	Conserved hypothetical protein.	expressed protein	10.5254	10.6213	10.9571	8.81982	9.27919	9.22608	9.9847	9.71101	9.63799	7.39681	7.673	9.04475	9.87343	10.7309	11.079	9.41036	9.42758	9.76881	11.7964	12.161	11.1676	11.2524	11.1091	11.9201	11.0857	10.6463	10.3281	11.3851	10.0751	10.6032	8.9757	9.16463	9.49259	9.75445	9.57368	10.3735	9.19528	9.60042	9.89935	9.42492	9.19318	9.87303	13.3622	11.6056	11.8752	9.21827	12.6456
Os06g0255400	NUDIX hydrolase domain containing protein.	hydrolase, NUDIX family, domain containing protein, expressed	11.0026	10.991	11.266	10.2373	10.1745	10.6689	11.2578	11.4417	11.5178	9.35502	9.58667	10.3436	10.6782	11.4758	11.3955	9.58538	9.91025	10.3446	9.17433	10.0356	9.23029	8.40009	8.37587	9.02985	9.38583	9.11451	9.27807	9.3764	8.91928	8.40433	7.2462	7.28132	8.34861	6.97813	7.03966	7.47951	7.46541	8.25707	8.97353	6.93306	7.52126	8.08881	8.68592	7.16207	6.93049	7.47915	6.99813
Os06g0256800	Conserved hypothetical protein.	expressed protein	2.57694	3.30461	4.36097	3.76185	3.77621	5.03241	3.71697	3.59195	4.09655	7.31747	4.635	5.03185	2.19174	2.64652	3.29174	3.86813	3.44485	3.60484	7.19174	5.75779	6.26603	7.43793	7.2933	7.96411	3.73156	4.05193	5.26097	4.26699	3.86718	5.57112	6.78944	7.29933	7.77346	7.24485	7.38059	7.44737	5.2933	5.88234	6.39204	5.6525	6.17642	6.76555	10.3903	9.57	9.78799	7.29917	10.0918
Os06g0266800	GAST1 protein precursor.	GASR7 - Gibberellin-regulated GASA/GAST/Snakin family protein precursor, expressed	4.16565	3.537	4.73832	3.657	3.7066	7.41068	4.43624	4.57355	3.93395	4.30457	4.09515	5.35784	1.50981	2.1198	2.8773	-0.0569471	3.55533	4.01554	12.8226	11.893	10.8898	12.2239	11.813	11.7841	4.62978	3.66086	5.75542	4.07314	3.40948	4.91068	11.3058	11.6598	12.2733	11.0742	11.3938	11.3965	8.32411	9.50394	10.6118	10.4096	10.3447	10.9122	14.2234	14.0002	13.9387	8.19409	13.6354
Os06g0270200	K+ potassium transporter family protein.	potassium transporter, putative, expressed	6.45146	5.9594	7.90287	6.60422	5.42618	7.16033	7.34711	6.99533	7.45995	6.7338	6.42884	6.60852	7.4549	6.72906	6.98769	6.65216	7.32835	7.45798	9.06928	6.63457	8.51728	6.41457	7.51022	7.45375	6.92657	6.74398	5.60923	7.14606	6.52432	5.59357	8.31737	8.21078	8.41286	7.2968	7.11686	7.77602	7.5119	7.6384	8.17451	7.46322	6.97564	7.91564	7.24527	7.44195	7.29819	6.8825	7.44925
Os06g0271100	(No Hit)	No Hit	5.2378	6.28381	6.26756	6.9441	6.40492	7.20186	6.73439	8.06	7.35246	6.10093	4.95016	6.53332	6.52149	4.29131	6.07206	6.78232	7.4677	5.41774	3.89322	4.66396	5.78098	4.81266	4.52289	4.13646	5.59398	6.10073	5.92689	4.76028	4.21545	5.61058	5.71033	6.0676	5.37131	5.78226	6.42907	6.99923	8.75929	6.98983	6.03704	6.55015	6.34321	5.62239	6.35827	4.64354	5.35994	5.60909	4.61759
Os06g0308900	Zinc finger DHHC domain containing protein 15.	DHHC zinc finger domain containing protein, expressed	9.23472	9.41642	9.14357	9.53138	9.81705	9.10911	9.34346	9.71567	9.4873	9.15442	9.5013	9.07041	9.3769	9.64133	9.47752	9.4016	9.7054	9.55738	8.58362	8.47293	8.79806	8.95366	9.12959	9.1769	8.54099	8.2728	8.32235	8.9453	8.73517	8.0863	8.89699	8.702	9.43003	9.54186	8.73456	9.49696	8.53193	8.50176	9.16907	8.76292	8.48677	9.25631	9.21539	9.43304	9.65613	9.91223	9.54199
Os06g0328800	Conserved hypothetical protein.	expressed protein	6.88792	5.8135	8.95217	6.28347	6.40327	9.03993	7.25439	6.89004	6.75559	7.41554	7.67575	6.9767	5.81247	5.83469	5.67351	6.51796	6.77189	7.093	10.8499	10.2791	11.3877	10.8761	11.4039	11.187	8.50149	8.53266	9.13852	10.0258	10.3544	9.81363	10.9406	10.7997	10.5882	10.6381	10.3208	10.2724	10.3833	10.559	10.7392	10.4765	10.2843	10.7657	11.9416	11.8707	11.7856	12.7186	12.1208
Os06g0357800	Conserved hypothetical protein.	expressed protein	5.77064	6.17807	6.09173	6.14749	6.73212	6.7125	3.81163	5.17199	4.72857	3.56539	4.45355	7.32119	4.21635	4.0811	4.37691	3.94652	3.19245	4.38478	4.26198	3.6597	3.68195	4.09516	4.1506	4.81613	4.00397	5.2381	6.22426	4.63049	4.09977	5.71948	3.68944	4.75378	4.57698	3.84575	4.92155	4.60282	10.5377	7.80426	6.06047	8.00977	7.8773	5.65801	7.26936	4.00173	4.32118	5.49287	3.60965
Os06g0474500	Protein of unknown function DUF239 domain containing protein.	carboxyl-terminal peptidase, putative, expressed	3.25446	3.54563	2.01003	3.16543	2.48799	3.21918	3.52432	2.51093	2.16996	2.79433	2.75892	1.26428	3.17241	2.59642	2.54447	3.61004	2.19109	2.48886	11.0951	10.555	10.6919	11.4237	10.9545	10.8239	3.82425	2.83461	6.09741	2.87658	1.90087	3.72472	9.96093	9.83143	9.67498	10.0523	9.63834	9.03047	7.77264	7.89899	8.28721	8.57131	8.49028	8.31148	11.2054	11.7159	12.4461	6.61477	11.4432
Os06g0478600	Leucine-rich repeat, plant specific containing protein.	polygalacturonase inhibitor 1 precursor, putative, expressed	6.3161	6.12933	7.35764	4.58402	4.34053	6.39563	6.00473	5.65445	5.75942	2.59511	2.68619	3.52727	4.62999	3.89353	3.02525	3.65736	2.94979	2.73047	12.7613	11.0262	12.973	12.4715	13.2191	12.9663	4.06696	4.96748	4.21377	4.46953	3.22871	5.41118	9.05478	9.64472	9.5835	8.92118	9.48618	8.75005	7.40642	7.0462	8.14489	7.81897	7.57034	8.74667	13.2401	13.2053	13.2155	7.83734	12.9693
Os06g0564100	(No Hit)	expressed protein	5.0612	5.11986	6.83483	4.08326	3.53566	7.93072	2.72329	3.89974	3.62925	2.10803	3.29427	3.76712	4.3561	3.72618	3.74423	3.17053	3.01662	3.05058	10.6432	7.04863	10.1326	6.25643	8.7884	9.74155	3.24065	3.30374	2.84795	3.41859	3.36787	4.01685	7.70569	8.62288	9.23064	8.19348	7.73355	7.6667	6.47186	6.27562	7.00579	6.60478	7.76534	6.40324	6.02596	10.4431	11.5689	9.33668	11.2289
Os06g0564300	Conserved hypothetical protein.	No Hit	10.3066	10.3809	9.67976	9.94324	9.90022	9.52284	10.222	10.0491	9.89519	10.4648	9.86335	9.38795	10.1293	10.2542	10.1709	9.8132	10.1989	10.1165	9.11269	9.19849	9.14214	9.46405	9.50359	9.54919	8.97752	7.88833	8.52981	9.49959	9.73101	9.00571	8.99579	8.93917	8.68156	9.21482	8.88744	8.8501	9.02932	8.85875	8.88293	9.72643	9.08385	8.97609	10.0941	9.81363	9.59156	9.8208	10.1963
Os06g0602500	Protein kinase domain containing protein.	S-locus-like receptor protein kinase, putative, expressed	7.23808	7.16969	6.5137	8.16162	8.64824	7.59464	8.2308	8.38118	8.93139	11.0339	10.6464	10.0217	10.6508	10.4877	9.68762	9.7625	10.348	10.2988	8.13062	9.19433	8.68067	8.87244	8.00741	8.59818	10.3148	9.79815	10.0968	10.6845	10.8285	9.98772	7.04714	7.15747	8.03363	7.36245	6.46039	7.23248	7.34165	7.20176	8.7181	7.59822	6.82217	8.64927	6.31661	6.54256	7.81904	9.42383	7.51184
Os06g0612300	Zn-finger, C2H2 type domain containing protein.	ZOS6-05 - C2H2 zinc finger protein, expressed	6.98873	6.9881	6.26287	7.62466	7.66932	6.70207	8.14157	8.24513	7.9364	8.29554	8.64291	7.88269	8.25733	8.28828	7.76534	8.44573	8.20355	8.51798	8.34241	9.68501	8.96039	9.61189	8.93005	8.99803	9.39703	8.89865	8.91497	10.9097	10.8241	10.1499	4.51073	4.65881	3.09508	4.4096	5.2521	5.06347	5.92435	5.83448	5.21368	5.84622	6.11915	5.82006	7.78566	8.5775	8.23085	9.27026	8.14212
Os06g0618600	Conserved hypothetical protein.	expressed protein	10.2436	10.1813	10.1705	10.8874	10.9375	10.7457	10.8769	10.5319	10.4832	11.011	10.8906	10.2841	10.5391	10.7115	10.6209	10.7374	11.1175	10.8333	10.7985	10.284	10.9706	10.8435	11.1349	11.4869	9.97182	9.78479	10.1653	10.5007	10.4257	10.294	11.1164	10.7681	11.3142	11.308	10.7318	10.9432	9.83632	10.131	10.721	10.4409	10.1143	10.6768	11.1968	11.8045	11.691	12.1672	11.8992
Os06g0624700	Conserved hypothetical protein.	expressed protein	2.65946	2.55194	4.59855	2.30484	5.76292	2.63688	2.71456	1.18734	1.58443	1.71887	1.78148	1.92038	4.51297	2.62985	2.65854	3.46816	1.61577	2.91408	8.96473	7.21149	10.1349	7.52918	9.07844	8.87377	3.25059	5.75627	2.31418	3.70497	4.60058	5.47853	6.77355	6.39964	6.59577	6.02987	5.33344	4.74072	4.49013	4.49986	5.03226	4.35895	5.07976	5.19472	8.28961	9.04312	8.64639	9.02561	8.68049
Os06g0634500	Protein kinase domain containing protein.	STRUBBELIG-RECEPTOR FAMILY 8 precursor, putative, expressed	5.24725	4.74323	5.24103	5.12015	4.75598	5.45128	4.7849	3.55497	4.35618	4.96118	4.62372	4.87127	4.2859	4.23336	4.34778	4.64066	4.58614	4.48208	8.34223	6.38228	9.74701	7.80906	9.33896	9.67795	4.97304	5.89525	5.51088	6.26804	6.84733	7.84642	9.3176	8.5424	9.27032	9.82905	8.63532	9.18217	7.01219	7.01181	8.25771	7.94567	7.58327	8.35148	7.79066	10.2384	10.5333	10.81	10.4242
Os06g0646400	Octicosapeptide/Phox/Bem1p domain containing protein.	protein kinase domain containing protein, expressed	10.0639	9.87676	9.67888	10.1251	10.1669	9.52444	10.6907	10.6605	10.5368	11.3965	11.2986	10.5743	10.3588	10.5915	10.0719	10.1646	10.6934	10.8062	10.4073	10.8364	10.3517	11.4061	11.1504	10.9709	10.7795	10.4678	11.0752	11.9194	11.581	11.0784	11.0084	10.7423	10.9032	11.3004	10.7287	10.8875	10.6535	11.0922	11.1269	11.4836	11.2339	11.2772	11.6688	11.6415	11.5494	11.924	11.8479
Os06g0663900	Protein kinase domain containing protein.	protein kinase domain containing protein, expressed	6.80132	7.21294	8.75385	5.93284	6.42606	6.64648	8.78516	8.58295	8.57696	7.42242	7.66625	7.31799	8.54235	8.48822	8.11584	7.25161	7.83291	7.19148	8.81358	8.51851	9.51621	7.45807	8.29069	8.65751	8.74551	8.16962	7.5175	8.21016	8.0111	6.13785	7.74151	7.92699	7.94237	7.57033	7.74312	7.95622	7.62921	7.02457	7.46981	7.24379	6.99193	7.05911	7.35542	8.81277	8.27894	8.88338	8.44356
Os06g0693100	Disease resistance protein family protein.	disease resistance protein RGA3, putative, expressed	8.6619	8.4882	8.87542	5.53192	5.93456	6.25997	8.92764	8.81104	8.49682	3.51393	3.72728	2.44091	7.49429	7.76133	7.91757	3.03509	3.84962	3.32682	8.10848	7.74193	8.04826	4.27529	5.92059	5.8698	7.17407	6.47141	7.81168	5.25981	4.75069	5.1783	4.95484	4.95604	5.46503	4.3111	4.29088	3.86565	4.20499	4.68051	5.8918	3.25336	3.92039	3.60535	1.42216	5.87331	4.05582	6.5822	3.61446
Os06g0704500	Leucine-rich repeat, plant specific containing protein.	retrotransposon protein, putative, unclassified, expressed	3.11379	4.19609	3.88672	5.06778	5.11008	4.05763	3.75646	3.84216	3.0115	4.21852	3.91315	3.40534	3.67162	3.54841	3.73301	6.17505	4.46003	4.48474	12.0528	12.1007	11.7323	13.5271	13.3801	13.1593	6.01206	1.1479	5.52325	4.82762	4.07194	4.28574	11.5892	11.6536	11.3668	11.74	11.6038	10.5494	9.5623	9.19139	10.198	9.79082	10.0313	10.202	14.1901	13.9058	14.066	7.76607	13.5494
Os06g0708700	Protein of unknown function DUF6 domain containing protein.	integral membrane protein, putative, expressed	11.7258	11.382	12.0367	10.4875	10.4337	10.9751	12.8933	12.3606	11.986	11.7089	12.2126	11.4451	9.86124	9.988	10.3074	9.92096	10.1401	9.98235	11.4457	11.023	11.7626	11.053	10.7783	11.3991	12.8029	12.5175	13.1884	12.6226	13.0597	12.2108	11.5691	11.4578	12.0996	12.0127	11.2807	12.0801	10.8926	11.4937	12.42	12.8603	12.2613	12.2983	10.2045	10.8287	10.5947	12.28	11.3611
Os06g0709500	(No Hit)	No Hit	5.29604	6.04184	6.16441	6.75994	6.31856	7.17177	6.00151	7.76946	7.11016	5.80709	4.65335	6.42104	6.32086	4.03083	5.72554	6.65837	7.22593	5.21366	3.72597	4.5043	5.38836	4.54502	4.53589	4.63946	6.04338	6.22514	5.62653	4.47988	4.21634	5.51349	5.60319	5.86122	5.11601	5.66987	6.38215	6.87397	8.71763	6.85572	5.99324	6.61791	6.38297	5.31902	6.28649	4.64231	4.59094	4.93908	4.36631
Os06g0717600	Zn-finger, RING domain containing protein.	zinc finger, C3HC4 type, domain containing protein, expressed	8.99557	9.28861	9.80264	8.98753	9.48842	10.2001	8.88545	9.66568	9.81002	9.30628	10.0092	10.3525	8.83121	9.63181	9.37629	9.38821	9.41076	9.71837	11.0935	11.132	11.1131	11.4643	11.1823	11.3607	11.8637	11.559	12.134	12.2949	12.3003	11.8467	8.01815	8.47978	8.68295	8.05307	8.60742	9.10158	7.95124	8.43503	8.46319	8.0918	8.39918	8.61222	10.5404	10.7282	11.0603	10.6898	10.825
Os07g0102300	Conserved hypothetical protein.	expressed protein	10.1782	10.0101	9.91701	10.3681	10.1027	9.97585	10.6512	10.4834	10.4146	10.7075	10.542	9.96026	10.8548	10.378	10.211	10.2509	10.2546	10.2003	10.7171	10.6117	11.5858	10.9722	11.4605	11.5996	9.83099	9.33121	9.66621	10.3751	10.5215	9.98477	10.9141	10.3423	10.9403	11.0382	9.97374	10.6406	10.0675	10.2492	10.8234	10.7919	10.446	10.9262	11.0863	11.5798	11.5815	11.4168	11.3363
Os07g0105800	Protein of unknown function DUF594 family protein.	expressed protein	2.46416	2.92711	3.11121	2.19195	2.97851	1.83414	2.01496	2.10879	5.38362	2.76891	1.94573	2.12826	3.24147	3.22971	1.74184	3.53601	2.07928	1.40176	6.28448	5.29504	5.92604	7.41252	7.64323	7.37267	4.69309	4.36854	3.91155	3.32453	2.96137	3.73756	2.93558	3.31306	3.0755	3.02744	3.38237	2.21128	3.89119	2.9737	2.81154	2.49694	2.33201	2.41852	5.25741	6.12623	6.323	3.47268	6.30008
Os07g0119400	Pectinesterase like protein.	L-ascorbate oxidase homolog precursor, putative, expressed	6.90034	6.28227	6.33705	3.90886	6.36721	3.7824	3.97537	3.79617	4.0883	3.78214	4.3328	4.02165	5.10958	4.74238	4.91303	5.02395	4.17719	3.5104	12.1859	10.7395	12.3035	12.3045	12.928	12.9491	2.18778	4.08212	6.25714	3.73669	5.43838	5.23996	12.7564	12.7633	12.9598	12.6969	12.2776	12.0475	10.9571	10.8056	11.932	11.4226	11.0574	11.5321	13.5201	13.6078	13.8452	7.85901	13.4094
Os07g0119700	Cupredoxin domain containing protein.	PS60, putative	6.14574	5.8781	5.55025	4.53031	4.66263	3.97948	2.76613	3.87606	4.78454	2.89542	4.14989	4.40707	3.88677	4.24937	5.17521	4.03487	3.76574	4.0919	10.893	9.6549	11.6077	11.1332	11.8217	12.1452	4.14441	4.44415	3.686	3.72292	4.84505	4.72786	11.476	11.8068	12.2973	11.3322	11.2155	11.1948	10.2125	9.70509	11.0685	9.91187	10.2638	10.5419	12.3923	12.7007	12.961	6.7462	12.5048
Os07g0132000	(No Hit)	leucine-rich repeat family protein, putative, expressed	5.1347	4.38833	5.37646	4.60715	4.59044	5.29193	4.46292	3.96311	4.67788	4.76341	4.70426	5.24907	3.88768	2.48076	3.35706	3.76782	3.75978	3.55437	5.13209	5.46586	5.28858	5.36869	4.9634	6.29042	6.42867	5.99871	5.54933	7.2213	6.95486	6.89029	4.00663	4.15677	3.08061	3.66714	5.16277	4.11537	4.67531	4.68929	4.59072	4.36628	4.4824	4.5865	6.15429	5.86918	5.91916	5.23251	6.46947
Os07g0145400	Protein kinase domain containing protein.	leucine-rich repeat family protein, putative, expressed	3.91506	2.77547	3.75038	3.03767	1.87884	0.817125	2.99893	0.857921	1.14123	3.19572	1.6126	2.37539	4.39843	2.46592	1.3062	1.97575	2.00112	1.84986	7.67723	7.59034	6.36464	9.18453	9.02862	8.73299	3.13815	5.08301	5.94546	2.14215	0.0635373	3.41328	6.94902	6.78196	6.91221	7.62247	7.09222	6.80961	5.70813	4.58544	5.28363	5.20193	5.16353	5.44213	9.60773	9.14815	9.40673	1.82176	9.6841
Os07g0152200	Receptor-like protein kinase.	receptor-like protein kinase 2 precursor, putative, expressed	3.82056	3.19001	4.35614	4.12715	4.09309	5.30541	4.34359	3.88931	4.04435	3.95093	4.56177	5.2669	4.00728	3.78247	4.0335	5.59618	5.98629	6.09439	7.20244	6.68764	7.08061	7.73205	7.71622	8.75354	3.23229	3.78641	4.17373	6.88469	7.15914	6.55491	7.79167	7.79177	8.65181	7.97929	7.13843	8.19657	8.20021	8.04446	8.3067	8.32542	7.71473	8.8212	8.23897	8.45935	8.64455	8.48717	9.04619
Os07g0158900	Cyclin-like F-box domain containing protein.	OsFBL34 - F-box domain and LRR containing protein, expressed	9.28788	9.08964	8.29764	9.61157	9.47406	8.50656	10.1464	10.2298	9.97685	10.5336	10.4723	9.89434	9.66781	9.74976	9.60954	9.60775	10.2384	9.71084	9.28098	10.0113	9.50803	10.0726	9.71913	9.97257	10.1118	9.62575	10.1852	10.7453	10.6423	10.4197	10.6699	10.206	10.5302	10.8452	9.80822	10.5054	10.6723	11.1744	11.2481	11.284	11.4665	11.3858	10.8099	10.8665	10.5857	11.0397	10.9792
Os07g0160100	YABBY2.	YABBY domain containing protein, putative, expressed	1.64337	2.10831	3.08227	2.97061	3.45685	3.03844	3.27852	2.28685	2.86607	3.96718	3.08689	1.85479	3.00501	1.80423	2.10907	3.09543	4.99615	1.64075	3.29112	2.64621	2.51089	3.09835	3.43946	3.50203	3.14779	5.26145	-0.111957	2.72912	3.60549	3.86766	4.16359	3.69403	2.1242	3.35524	4.51356	4.57462	4.26264	3.80668	1.96488	2.36074	3.66718	3.11817	2.94827	2.70129	3.50964	2.24773	2.34156
Os07g0176200	Tesmin/TSO1-like, CXC domain containing protein.	tesmin/TSO1-like CXC domain containing protein, expressed	6.05519	5.47998	5.77252	9.44276	9.1856	8.68044	7.20646	6.12361	5.84752	10.0795	9.74073	9.27234	6.79168	6.62545	6.36458	9.39253	9.41332	8.8297	8.80241	8.39839	8.27097	9.8169	9.76982	9.89994	7.18021	6.92872	8.07092	9.12719	9.77998	9.91378	9.19603	8.45718	9.28508	9.93257	8.36184	9.48214	8.15199	8.58903	9.63592	9.88449	9.33465	10.0287	10.7437	10.3248	10.463	8.56402	10.6787
Os07g0178100	ETO1-like protein 1 (Ethylene overproducer 1-like protein 1).	BTBT2 - Bric-a-Brac, Tramtrack, Broad Complex BTB domain with tetratricopeptide repeats, expressed	6.33649	5.7124	6.63134	6.45392	6.4037	6.39455	6.21506	6.31512	6.24335	5.70373	5.9004	5.32901	6.66272	6.38135	6.89345	6.26455	6.26545	6.2016	6.52978	6.18187	6.21357	7.27769	7.23535	6.83576	5.84492	6.08989	5.01067	5.92786	5.78314	5.31522	7.38773	6.95999	7.27402	7.72284	7.30399	7.50288	6.37749	6.18061	6.60261	6.21767	6.17441	6.24711	5.94136	6.64809	6.46583	6.43113	6.33782
Os07g0252400	Cellulose synthase-8.	CESA6 - cellulose synthase, expressed	9.84456	9.43671	11.5661	7.96984	8.28652	9.85171	8.06081	7.57556	7.14248	7.285	7.63827	7.0672	7.13148	6.96883	6.56857	6.47383	6.79736	6.46528	12.5065	11.456	12.8325	11.5596	12.4487	12.5642	8.31399	8.69479	8.91842	8.59951	9.19571	8.99237	13.4084	13.4772	14.0355	13.42	13.1314	13.139	11.5042	11.2184	12.5941	8.85771	11.5	12.2925	12.4948	14.052	13.7848	13.6778	13.5273
Os07g0281800	Aldehyde oxidase-2.	No Hit	6.96637	6.66368	6.97238	6.52098	6.18624	6.49093	6.82771	6.15344	6.04415	5.83734	5.66519	4.81073	5.6571	5.3265	5.46869	5.09352	5.69986	4.3166	7.28264	7.9772	8.13236	8.18309	7.5169	8.11694	7.79212	7.26546	8.02277	8.14443	9.48593	8.89869	9.33317	8.87139	9.35051	10.3355	8.50216	9.41394	8.18271	8.60354	9.95298	9.61306	8.55566	10.1621	8.33384	9.11258	9.15939	7.68761	8.92723
Os07g0293000	Cytochrome P450 family protein.	cytochrome P450, putative, expressed	5.53183	4.7642	5.92875	5.12419	5.14033	3.62297	4.12062	3.72434	4.47585	4.47075	3.17611	4.48941	7.29745	6.13706	5.63457	5.46933	5.26042	4.94878	5.71381	6.35105	5.73235	5.57303	5.65831	5.26384	4.71733	5.78906	5.30884	6.96647	5.83922	6.03601	5.59916	5.44192	5.5619	5.56498	5.05451	4.63087	5.33463	5.63424	6.33579	5.90414	5.33329	5.88257	4.57927	6.21424	2.64334	7.47713	4.66101
Os07g0442000	Cyclin-like F-box domain containing protein.	OsFBX235 - F-box domain containing protein, expressed	9.44942	9.07076	8.92459	8.68495	8.5916	8.13305	9.66272	9.20682	8.75474	8.97843	8.94908	8.01084	7.73109	8.00603	7.81347	8.05665	8.75818	7.42919	7.92028	7.56799	8.09153	7.24066	8.13835	7.98619	8.01681	6.63187	7.35484	6.51957	7.24009	7.08548	6.70157	6.58116	6.44707	6.79027	6.55467	6.63261	6.7042	6.80053	6.81445	6.68978	6.65111	6.44751	8.51114	8.34198	8.11542	8.86292	8.55116
Os07g0443500	Myb, DNA-binding domain containing protein.	MYB family transcription factor, putative, expressed	9.92765	9.35883	11.3439	9.06536	8.32002	10.5956	10.4856	10.5966	9.02399	9.62577	9.97002	11.9307	6.65504	8.24035	7.97551	6.69596	6.24858	7.51413	6.84041	4.65257	7.71513	4.09236	4.87031	4.58086	5.00817	4.38913	5.20987	4.3848	4.6044	4.94627	4.6536	5.3351	3.73155	4.37008	6.29475	5.15406	6.53879	6.05852	4.60427	4.36449	5.59381	4.19501	3.22331	3.37596	3.97283	4.23713	2.62002
Os07g0484700	Myb, DNA-binding domain containing protein.	MYB family transcription factor, putative, expressed	9.97986	9.84576	9.52493	9.87994	9.64628	9.06637	10.2067	9.53957	9.12972	10.1423	9.93725	9.36876	8.57739	8.23411	8.7807	8.32642	9.34278	7.86313	7.69324	8.26723	9.07119	7.42702	8.11025	8.45354	7.90158	7.57747	8.64703	7.98767	8.61532	8.16746	9.19066	8.32978	9.22049	9.07468	7.2612	8.7347	7.29391	8.53299	8.8244	9.07601	8.58435	8.96309	9.90343	9.84707	9.43659	10.1498	9.80437
Os07g0491600	Conserved hypothetical protein.	expressed protein	8.38342	7.73006	8.27377	8.68809	8.1172	8.51648	8.75403	8.55169	8.53722	8.72728	8.40078	8.14097	8.95748	8.56398	8.24174	8.7701	8.75653	8.54311	7.99577	8.10485	8.60753	7.93428	8.17136	8.4169	8.65931	8.15119	8.46471	8.68816	8.73277	8.04843	9.56766	8.97373	9.36976	9.72464	8.75589	9.27578	8.28417	8.41933	9.20351	9.25013	8.28912	9.04367	7.11835	8.33056	8.26578	7.51952	8.25378
Os07g0505200	Squamosa promoter binding protein-like 5 (Fragment).	OsSPL13 - SBP-box gene family member, expressed	12.7255	11.6915	12.5722	14.0656	13.4674	13.7251	12.6866	12.5709	12.2787	13.6304	13.9656	13.4893	8.97574	9.0844	8.94312	10.9495	10.9195	10.3359	12.5453	12.1554	11.7625	13.8644	13.2599	13.1724	11.7546	12.1215	11.7631	13.2819	14.5028	14.6175	9.70996	9.14029	9.27327	10.014	9.21925	8.90693	10.5912	10.5888	10.8585	10.2776	10.4275	11.503	16.5824	15.6903	16.0592	14.8729	15.8443
Os07g0508900	Zn-finger, Dof type domain containing protein.	dof zinc finger domain containing protein, putative, expressed	6.61427	6.55576	6.62235	6.42237	6.77439	6.70678	6.58847	7.46905	7.25651	6.55024	7.17325	6.97816	7.21629	7.36195	6.76949	7.42599	7.27765	7.54012	6.83269	6.95919	6.32451	7.17052	7.15482	6.91012	5.36569	4.53215	5.26477	6.95567	7.79573	5.91724	6.86423	7.32477	7.41841	6.81136	7.31867	7.27858	7.84185	7.23949	7.28344	7.09428	7.11266	6.86199	8.42795	8.75217	8.69621	7.95404	8.67193
Os07g0515100	Calcium-dependent protein kinase, isoform 2 (EC 2.7.1.-) (CDPK 2).	CAMK_CAMK_like	10.7378	10.4842	10.5838	11.6493	11.344	11.2142	12.2375	11.63	11.4217	12.5844	12.1582	11.7405	10.4212	10.8306	10.8735	11.4987	11.8651	11.775	11.8433	11.3395	12.1665	11.6936	11.8879	12.2111	11.5382	10.9946	11.5338	11.3057	11.6587	11.4992	11.8922	11.3322	11.7819	11.9562	10.9984	11.2496	10.8609	10.9851	11.5149	11.6694	11.0308	11.5192	11.7412	12.4508	12.4383	12.451	12.397
Os07g0543700	Conserved hypothetical protein.	No Hit	13.1817	13.8527	12.9175	13.5402	14.0297	13.356	13.1259	13.7382	13.6876	14.0759	14.4115	14.0717	13.1786	13.7535	13.1453	13.9701	13.9562	14.5911	14.6011	14.3617	14.4161	15.4114	15.173	15.2854	13.7755	13.385	13.5273	15.016	15.2487	14.2217	14.4667	14.8185	14.9995	14.4799	14.7306	14.6072	14.3008	13.9483	14.4405	13.7485	14.0391	14.6843	16.2797	15.9903	16.2137	15.7116	15.8694
Os07g0561300	Cyclin-like F-box domain containing protein.	OsFBX257 - F-box domain containing protein, expressed	5.63669	6.08161	4.99809	2.93955	2.24753	3.1889	4.71289	4.54523	4.79017	3.82779	2.51066	2.56954	5.90755	5.20982	4.97764	6.08961	4.08635	3.17967	7.26081	7.07133	5.72485	8.11423	7.86958	7.59163	5.38055	5.32233	4.96974	3.65093	2.47356	4.59829	8.52087	8.12584	8.58427	8.78049	7.82389	7.56927	6.25091	6.42906	7.30042	6.85744	6.53542	7.56883	9.25919	8.42403	8.61975	3.46143	8.35976
Os07g0571300	Conserved hypothetical protein.	expressed protein	7.60139	7.00481	7.63351	9.36272	9.59442	9.41905	6.65745	7.11206	7.10928	8.37266	8.43633	8.74376	7.71102	8.18928	8.17583	8.86409	8.93936	9.27642	7.91566	7.47757	7.31949	8.6466	8.58566	8.52205	6.03908	6.26248	6.27133	8.45612	8.03516	8.38189	6.78733	7.13808	7.0317	7.11291	7.339	7.40906	6.3344	6.62199	7.08006	7.48022	7.39433	7.39345	8.08734	7.34131	7.1194	7.86878	7.93831
Os07g0582100	HAT dimerisation domain containing protein.	No Hit	5.80677	5.46192	4.15647	5.49482	5.56302	4.85402	4.68765	5.7287	4.59451	5.28816	5.30618	5.48933	5.00603	5.04421	4.56464	5.1362	5.9579	5.59684	3.61836	3.62181	2.98059	4.07284	4.84013	3.62341	3.93574	2.93951	4.1961	4.15244	3.16979	5.77846	4.84386	5.46799	3.96903	4.51579	6.09846	4.689	8.04176	6.16059	4.50367	5.81878	6.01373	3.99602	5.06347	4.39039	3.55302	4.43269	4.25219
Os07g0587400	Eukaryotic peptide chain release factor subunit 1-3 (eRF1-3) (Eukaryotic release factor 1-3) (Omnipotent suppressor protein 1 homolog 3) (SUP1 homolog 3).	eukaryotic peptide chain release factor subunit 1-1, putative, expressed	14.0292	14.1558	14.0111	14.5427	14.7908	14.7751	14.2579	14.6141	14.3019	14.4104	14.5324	14.2466	14.4614	14.8698	14.6531	14.5797	14.582	15.0146	13.7998	13.6372	13.2512	14.363	14.049	14.1535	13.9293	13.6544	14.4556	14.7053	14.6099	14.325	13.6149	13.5769	13.9523	13.878	13.6118	13.9047	12.838	13.0327	13.5329	13.5954	13.3176	13.4849	14.3788	14.4041	14.2623	14.7654	14.4972
Os07g0592000	Gibberellin regulated protein family protein.	GASR9 - Gibberellin-regulated GASA/GAST/Snakin family protein precursor, expressed	2.17034	3.48881	3.50603	3.24537	3.53604	3.86612	3.22669	3.06369	5.13128	2.95647	2.32908	4.31892	2.89131	3.02811	3.06464	2.42876	2.95369	3.64175	6.02311	5.40596	4.89658	6.07544	5.61427	5.52721	3.08441	6.09238	5.58541	3.40917	2.04653	4.96352	3.4465	3.63574	3.82652	3.4539	4.14909	3.29279	5.7422	4.38251	3.5675	4.25968	4.07485	3.96906	7.0633	6.51724	7.09258	4.2585	6.24837
Os07g0594400	(No Hit)	expressed protein	5.81482	5.31744	6.70868	10.2001	10.4303	10.2652	0.295672	3.13639	3.39128	0.193907	1.35711	3.80024	3.92055	3.69157	2.00778	3.25103	2.68607	2.37096	4.51934	2.18203	2.16431	3.76595	3.17132	3.3599	1.6997	4.6805	3.84102	-0.0221979	-0.134754	3.58418	5.29874	5.3107	5.61577	5.39794	4.30044	5.0589	5.07624	1.56671	4.51127	3.82664	3.3319	4.02587	2.61219	1.59333	2.3251	2.44044	3.41333
Os07g0600700	Conserved hypothetical protein.	X8 domain containing protein, expressed	10.5566	10.0054	10.1628	10.0383	9.85651	9.65888	9.23757	8.8707	8.67517	8.56639	9.09565	7.97647	8.09701	8.25119	7.94897	8.63799	7.99985	8.14879	14.6409	13.4014	14.5079	14.2158	14.699	14.6563	8.25517	8.98694	9.52015	9.14229	9.74346	9.92707	12.9207	12.1921	13.221	13.0048	12.3149	12.0924	11.1183	11.1102	11.9483	11.2629	11.1791	12.6052	14.4038	14.7279	14.6848	14.797	14.6766
Os07g0604800	Alpha-1,4-glucan-protein synthase [UDP-forming] 1 (EC 2.4.1.112) (UDP- glucose:protein transglucosylase 1) (UPTG 1).	alpha-1,4-glucan-protein synthase, putative, expressed	9.50213	9.21161	9.35549	9.52451	9.47314	9.0623	9.70981	9.67442	9.65586	9.78687	9.83358	9.30626	9.87617	9.87329	9.25577	9.56899	9.76936	9.43048	12.7628	11.8175	12.3599	12.5342	12.8579	12.6377	10.169	9.67551	9.79168	11.3813	10.9547	10.4301	13.4691	13.093	13.3596	13.435	12.879	12.614	10.9483	11.5067	12.2362	11.8293	11.7834	12.4365	13.1882	14.1031	13.8575	12.3422	13.5724
Os07g0611100	(No Hit)	No Hit	5.04218	5.99823	6.13297	6.61502	5.92105	7.03979	6.35788	7.78558	7.05308	5.81384	4.71845	6.40746	6.32399	4.18131	5.9691	6.70969	7.13208	5.39707	4.10545	4.45596	5.5121	4.48872	4.4247	4.47816	5.56302	5.53765	5.8919	4.38411	4.3	5.31411	5.55875	5.94398	5.356	5.66316	6.52406	6.86595	8.68182	6.8303	6.16133	6.59115	6.29861	5.42192	6.22506	4.6413	4.47946	5.46912	4.51323
Os07g0616200	Beta-ketoacyl-ACP synthase.	3-oxoacyl-synthase, putative, expressed	11.1324	11.1584	10.4617	10.7912	11.1278	10.8025	9.00382	8.76232	8.49414	7.74953	8.1588	7.42468	7.48219	7.07948	6.73691	7.40322	7.60862	5.95239	11.8897	12.15	11.474	12.2808	12.0423	11.4644	11.9432	12.0371	12.0372	8.57628	10.4132	9.72787	11.0982	10.7027	10.7074	11.0025	10.7555	9.99376	8.01188	8.30965	9.11344	9.0667	8.90226	9.35288	12.5988	11.6137	11.4449	8.60258	11.6609
Os07g0626500	Protein kinase domain containing protein.	expressed protein	7.82317	7.82695	7.41533	8.11958	7.8918	7.19716	8.98691	8.82625	8.64804	9.13299	9.08795	8.57252	8.9506	8.68838	8.34874	8.72314	8.73792	8.98177	11.4894	11.674	10.6625	12.4239	12.1762	11.9891	9.12064	9.12974	9.61365	10.3038	10.5853	10.2176	12.6082	12.2342	12.5839	12.3992	11.8777	11.7162	10.5828	10.1156	11.274	10.6292	10.7787	11.3235	12.9513	12.8597	12.8049	8.80547	12.5889
Os07g0631300	Conserved hypothetical protein.	expressed protein	8.67901	8.20373	8.64279	9.8664	9.42941	10.058	10.185	9.78025	9.65936	9.85943	10.182	9.99358	8.17679	8.6596	8.35196	8.6999	8.31	8.06359	9.64188	10.0919	9.45856	10.1455	9.64362	10.3277	10.97	10.5757	11.6752	11.442	11.3399	11.2586	9.08839	9.01554	9.2946	9.00002	8.46229	9.1904	9.10613	9.18036	9.8351	9.4919	9.21715	9.78004	9.1892	10.5918	10.7418	11.9585	10.9376
Os07g0633400	IQ calmodulin-binding region domain containing protein.	calmodulin-binding protein, putative, expressed	2.04516	2.30733	2.06983	3.43283	2.85578	2.79348	4.00213	2.41388	2.53626	4.19323	1.77415	2.21913	2.77068	2.08522	1.93224	2.80067	2.38034	2.38195	5.814	4.94901	5.65697	5.9574	5.62738	5.50642	4.82553	4.78769	4.78819	3.6569	2.60633	3.6814	7.20248	6.36244	6.96234	7.37858	6.32817	6.36991	5.16393	5.62454	5.94245	5.87607	5.48248	6.20419	5.54898	6.11205	6.17511	3.76536	6.23654
Os07g0635900	Protein of unknown function UPF0057 family protein.	OsRCI2-10 - Hydrophobic protein LTI6A, expressed	10.1102	9.99308	11.5243	10.4168	10.9863	11.4348	9.15359	9.6949	9.53669	9.44671	10.9962	10.3872	9.66433	9.50251	9.36252	9.82959	9.75333	10.0073	13.2744	12.1185	13.1129	13.0692	13.2317	13.279	9.28404	8.80504	8.89489	9.52267	10.5478	10.6601	12.7133	12.9013	14.2503	12.5989	12.5731	13.0076	11.5054	11.0149	13.0733	10.3589	11.7845	12.9494	13.8322	14.7708	14.641	14.6633	13.7381
Os07g0647100	Mo25 family protein.	Mo25, putative, expressed	11.5973	11.4363	10.3081	10.1664	10.0168	9.32089	10.994	10.658	10.4162	9.75055	9.64498	9.13022	10.3013	10.4228	10.4814	9.6962	9.84495	9.21592	10.1527	10.0993	10.3327	10.0094	10.2542	10.3862	9.74567	9.24803	9.52827	9.00225	9.03334	8.66989	10.4546	9.85069	10.2657	10.4433	9.31337	9.71377	8.91969	9.1594	9.79883	9.46423	9.31161	9.92668	11.4742	11.4831	11.154	10.0098	11.0941
Os07g0656100	Protein of unknown function DUF580 family protein.	choline transporter-related, putative, expressed	11.0272	10.4322	10.4725	9.89563	9.41236	9.13011	10.6344	10.3404	10.3352	9.6546	9.28939	9.13514	10.5963	10.4973	10.367	9.31767	9.21465	9.10392	10.332	10.7158	10.2665	10.1654	10.0778	9.92294	9.73944	9.51031	9.2509	10.3366	9.8602	9.80199	10.2108	9.68254	9.86164	10.4086	9.6465	9.83969	9.05769	9.3926	9.6066	9.36917	9.64315	9.41082	10.7303	10.8103	10.6366	11.0559	10.8109
Os07g0660100	Non-protein coding transcript, uncharacterized transcript.	No Hit	11.6079	11.356	11.2581	9.11519	9.45712	9.52331	12.2646	11.578	11.5027	9.98386	10.1429	10.3276	10.6125	11.9017	11.6911	9.95268	10.0111	9.46897	10.2619	10.5397	10.2111	9.57746	9.08537	9.31426	13.8653	13.1033	14.2044	10.8105	9.81266	9.39665	7.85292	8.07542	9.093	6.78234	5.02378	6.14214	8.09956	8.35065	9.3715	7.56547	6.84673	7.66812	4.00924	7.24854	4.97329	8.96369	5.15376
Os07g0675100	Pectinesterase (EC 3.1.1.11) (Pectin methylesterase) (PE).	pectinesterase, putative, expressed	4.66107	1.68325	7.28261	3.46031	3.03774	6.26924	2.66226	1.79106	2.67727	2.11079	2.4564	2.83365	2.63443	3.09185	3.34493	2.86779	2.42722	2.51983	10.8098	9.13765	11.1622	10.0319	11.0024	11.316	2.5954	4.55342	4.40519	2.70473	2.11015	4.02374	10.3611	10.0143	10.4578	9.98017	9.60841	9.30155	7.85176	7.57641	9.28336	7.9388	7.75467	8.95758	10.8754	11.2241	11.4242	10.3148	11.7742
Os07g0680600	Conserved hypothetical protein.	expressed protein	11.2424	10.878	11.0976	11.5027	11.1833	10.3557	11.413	11.2884	11.3353	12.4465	12.0155	11.5598	11.2221	11.3469	11.0346	11.972	12.3171	12.5089	10.4528	12.3175	11.231	10.7406	10.8481	10.7174	10.5699	10.2783	10.1961	11.8622	11.7615	10.7026	10.7075	10.2289	10.8985	10.9081	10.199	10.5102	10.352	10.5484	11.1565	11.1832	10.8379	11.0121	11.8523	11.0982	11.1501	10.7304	11.3145
Os07g0686900	Alpha-L-arabinofuranosidase.	alpha-N-arabinofuranosidase, putative, expressed	3.95591	3.84689	3.7926	4.44795	4.68997	3.98887	3.33219	3.20934	3.67175	3.20067	3.28692	3.99604	3.24214	3.37975	2.24522	4.33788	4.07211	2.04426	6.0579	4.58776	6.65786	5.96635	6.69007	6.50947	0.259166	5.65286	4.7544	2.61416	3.35489	4.67462	7.2578	7.71216	7.46046	7.41802	7.17606	7.36204	7.06539	6.29053	7.19446	6.39622	6.1667	6.77611	6.81452	6.88596	9.11404	9.51802	8.65483
Os07g0694300	Fungal lignin peroxidase family protein.	peroxidase precursor, putative, expressed	9.51059	9.3641	10.4954	9.4341	9.46666	9.94313	11.1325	11.3124	11.1596	10.3295	11.0383	10.5156	10.9626	11.6407	11.4376	11.4454	11.4779	11.8832	11.4668	11.7833	11.4419	12.036	10.9693	11.4005	11.8379	11.9862	12.4364	13.3507	13.05	13.3249	9.84706	9.76193	10.458	10.0235	9.46474	9.81997	11.7071	12.2749	11.5069	11.4758	11.5234	12.0575	10.7209	12.5802	12.5504	13.6146	12.6896
Os07g0694400	Glycosyl transferase, family 43 protein.	glycosyltransferase family 43 protein, putative, expressed	4.09591	3.67003	6.46041	1.94523	2.6996	5.90757	3.46301	2.2026	1.67742	1.4796	2.76722	3.46159	3.7382	3.38344	2.17795	3.96999	1.86111	3.79393	9.65661	7.98662	9.50714	8.53131	8.59128	9.76455	6.08545	6.67569	7.52811	5.39356	7.44177	8.43614	7.24643	7.3868	8.37285	7.55938	7.46571	7.6992	4.84614	5.93387	6.87483	5.98276	6.01855	7.61746	9.21333	10.1903	10.7873	9.56557	10.7303
Os08g0116900	Avr9 elicitor response-like protein.	galactosyltransferase family protein, putative, expressed	4.24535	3.66829	5.34053	4.02437	3.96439	5.05455	4.40031	4.38002	4.22625	3.44427	3.59167	4.36705	5.9229	2.73744	3.62427	3.41438	3.53399	3.82234	5.70801	4.70257	6.65519	4.89117	5.46218	6.15471	5.16663	5.35226	4.73792	4.99018	4.4805	5.38858	5.46921	5.44698	5.99361	5.70843	5.832	5.74025	4.74286	4.99272	4.90011	6.74459	5.22256	4.54813	6.06584	7.23998	7.45093	6.65999	6.66529
Os08g0121900	Conserved hypothetical protein.	zinc finger family protein, putative, expressed	7.10422	7.09566	7.7004	7.27237	7.24305	7.77698	7.63666	7.27889	7.39369	9.45856	9.41692	9.57039	7.2003	7.45624	7.21007	8.55857	8.41641	8.88763	9.11397	8.95073	9.61042	9.2176	9.66426	9.64861	7.91804	8.14585	9.26477	10.156	9.70882	9.3334	9.69944	9.18258	9.81334	9.78532	8.89828	9.75844	8.3386	9.09381	10.0413	9.22748	9.26163	9.5633	8.8133	9.06988	9.13437	9.91159	9.17287
Os08g0135100	Phosphate/phosphoenolpyruvate translocator protein-like.	transporter, putative, expressed	9.67966	9.93433	9.70051	9.66103	9.73014	9.30458	10.2107	10.2866	10.1666	10.3233	10.6154	10.2158	10.3649	10.2521	10.0707	10.4131	10.3088	10.1924	9.90981	10.224	10.2302	9.81433	9.87638	10.3235	10.2777	9.94309	10.0876	11.2007	10.689	10.1739	10.0116	9.65216	10.5345	10.6749	9.89714	10.5884	9.24596	9.18568	9.91137	9.7363	9.83562	10.1187	10.3758	10.5844	10.6154	10.1008	10.5185
Os08g0149600	(No Hit)	No Hit	5.37776	6.21226	6.18669	6.90071	6.37712	7.24894	6.41536	7.97321	7.27585	5.88436	4.86923	6.33477	6.5599	4.32648	5.94933	6.84441	7.41236	5.30234	4.15824	4.72732	6.08799	4.63163	4.66318	4.79438	5.30223	6.44853	5.71511	4.4782	4.36136	5.89263	5.67183	6.06865	5.15449	5.90807	6.55918	6.8537	8.8783	7.00094	6.05111	6.68299	6.5528	5.43128	6.46813	4.82848	5.2527	4.17944	4.41765
Os08g0160700	Non-protein coding transcript, unclassifiable transcript.	No Hit	5.04807	3.90849	5.81148	3.70022	2.88521	4.9816	4.33049	2.96676	3.77183	3.84394	2.78403	2.72159	3.28736	3.23266	1.18605	2.74966	2.5036	2.47328	6.39079	5.7455	8.34093	6.84599	7.63966	7.77168	5.30393	-1.43872	3.75761	3.39806	4.56625	4.10848	6.87757	6.07132	7.05979	7.0334	6.01957	6.51372	3.8781	4.29385	5.6986	4.88112	4.32659	5.94919	8.33095	8.34106	7.91565	8.67992	7.60767
Os08g0164800	RNA-directed DNA polymerase (Reverse transcriptase) domain containing protein.	retrotransposon protein, putative, unclassified, expressed	8.94907	9.56871	8.47163	9.87173	10.0465	9.34319	9.56216	10.0066	9.58025	10.5736	10.8291	9.80687	9.04543	9.38863	9.28217	9.65447	10.8336	10.2163	7.26077	7.14431	8.01096	7.95211	8.77499	9.01916	8.19294	6.9866	8.19619	7.31066	9.14638	8.47836	7.89058	7.76739	8.44611	8.04105	7.52007	8.45251	7.52704	7.24939	8.04029	7.39587	7.98232	7.78658	9.41558	9.75283	9.77095	9.64934	10.0307
Os08g0187500	Roc1.	homeobox and START domains containing protein, putative, expressed	12.7815	12.7314	12.9329	13.1935	13.3845	13.3608	12.8129	12.6336	12.8331	13.145	13.1588	13.3351	12.6461	12.981	13.0221	13.2683	13.1447	13.4125	13.2501	13.2572	12.9633	13.4441	13.2079	13.2322	11.4744	10.9382	10.4997	13.0508	12.6838	11.734	3.5474	3.52858	4.37894	3.6791	5.03328	4.37586	5.88592	4.35925	4.78738	5.25934	4.84845	4.76569	12.4989	12.0706	12.0745	11.1527	11.6827
Os08g0210900	Hypothetical protein.	No Hit	8.13699	8.46274	8.69467	8.95711	9.36888	9.26598	6.20439	6.71285	6.20036	5.93968	6.27121	9.72381	5.69384	5.23921	6.76036	5.28821	5.65415	7.34824	6.77813	6.28568	5.76169	6.50522	6.74379	5.95218	7.71967	8.13053	8.65847	7.22442	6.95533	8.87133	6.83175	7.65385	6.54785	6.77542	8.0619	7.67752	12.897	10.7531	8.6977	10.9575	10.9194	8.30961	10.0349	6.28391	5.58763	8.44225	6.53199
Os08g0226200	(No Hit)	No Hit	10.4719	10.4185	10.2907	8.66246	8.91878	8.48065	10.3218	10.386	9.58457	8.91898	9.57471	9.45203	7.38434	8.02011	7.82264	7.35979	6.7265	6.57765	10.8994	10.4617	10.0162	10.0686	9.59339	10.0789	9.80212	9.76046	12.1042	10.2582	10.7327	9.80565	9.2658	9.54927	9.65954	9.55986	8.90618	9.10015	8.99599	8.76811	9.40325	9.1594	9.26807	10.1469	12.2347	12.0208	12.044	12.2705	11.9471
Os08g0323700	Hypothetical protein.	amino acid permease family protein, putative, expressed	10.9332	10.8968	10.3655	10.9005	10.8256	10.1321	11.0504	11.0955	10.868	11.2171	11.1044	10.4277	11.5125	11.1642	10.8003	11.1153	11.2986	11.1918	11.0068	10.9292	11.3587	11.0571	11.4761	11.4104	10.3022	10.0385	10.5068	11.1846	10.8101	10.2092	11.8139	11.3595	11.5728	11.9334	11.0006	11.2179	10.2456	10.3873	11.1218	10.6395	10.6097	11.0136	11.6163	12.2459	11.9636	11.7746	12.0007
Os08g0375400	Plant disease resistance response protein family protein.	dirigent, putative, expressed	11.7541	11.1501	13.6587	11.8348	11.7242	14.1195	9.01116	7.07493	7.41211	7.4986	7.92268	9.73762	4.73596	4.42305	5.78372	4.76717	4.47611	3.91525	13.4178	12.7601	12.9855	13.1281	12.3554	13.234	10.6649	11.2851	10.9938	10.6189	11.4512	12.7096	9.06373	8.82975	9.58667	9.90557	9.26838	9.08289	7.74356	8.18458	9.04269	8.27807	8.655	8.78598	11.9843	12.081	12.6197	12.6627	12.0632
Os08g0411300	Conserved hypothetical protein.	expressed protein	4.81516	4.73108	7.04684	5.00068	4.89594	6.51663	3.17542	3.55423	3.87261	6.69305	5.51851	5.09879	3.71169	3.95199	5.57551	4.90949	3.95106	4.52356	8.264	7.25471	9.03539	8.00709	8.64979	9.31529	5.02282	5.30392	3.53647	4.93199	6.18661	5.03525	7.39142	8.06711	8.77754	7.43976	8.05155	8.34176	7.34391	7.22249	8.451	7.18268	7.73381	7.97172	7.85838	8.83023	9.1751	8.52047	8.45505
Os08g0413100	Protein of unknown function DUF1262 family protein.	conserved hypothetical protein	5.58826	5.50231	5.9253	6.25696	6.03674	5.98612	5.73667	5.325	5.43909	6.46363	5.9202	6.65099	5.43252	5.07667	4.68232	5.83324	5.65608	5.23282	6.66174	7.03619	6.78482	6.28476	6.7496	6.82825	7.00865	7.57554	7.25138	9.19223	7.46116	6.34421	7.79038	7.45416	7.9618	8.05865	7.09577	7.5776	8.04976	7.99204	8.46518	8.29678	7.49896	8.39052	6.64229	6.50487	5.83476	7.68302	6.81345
Os08g0433400	Myb, DNA-binding domain containing protein.	MYB family transcription factor, putative, expressed	4.43408	3.82187	4.71541	3.8879	4.08743	4.6758	4.34365	4.44868	4.3633	3.82218	3.75908	4.88831	5.30153	5.13049	5.89273	5.44252	5.87293	5.66632	11.3062	9.78838	10.8055	11.1543	11.2003	11.4757	4.94939	4.05956	3.65274	3.59071	3.45846	3.07762	5.71588	5.82882	6.1191	5.8823	6.2161	6.09864	6.00056	6.06866	6.23565	6.1581	6.2717	5.49669	9.58498	10.3231	11.0262	4.81244	10.3296
Os08g0442000	Hypothetical protein.	expressed protein	2.805	0.774655	1.91376	2.84946	1.80997	1.52666	1.40217	1.5524	3.27763	1.87632	2.01259	2.78842	1.26476	-0.589536	0.485131	1.04985	2.95984	2.25856	5.87388	3.33028	6.70322	5.12227	6.381	6.25784	3.88021	4.77409	3.46185	-0.726455	0.192587	2.69145	1.64402	1.79225	0.539587	2.81733	0.732476	1.49395	3.55716	1.30182	1.15751	2.00081	0.41658	2.32156	4.46851	5.9511	5.63791	2.85679	5.52642
Os08g0450100	Pectinesterase (EC 3.1.1.11) (Fragment).	pectinesterase, putative, expressed	2.04298	3.85148	5.1548	4.99239	4.64595	5.70945	4.06417	5.56327	3.48174	5.8121	5.11314	5.1717	4.54497	4.1668	4.21574	3.38257	3.52984	3.54569	7.75793	8.001	5.91504	8.34294	7.54814	7.26122	5.05277	5.2542	5.40032	5.73413	6.04071	7.00024	9.05265	8.5341	8.00686	7.60121	7.46506	6.61116	6.2694	5.83939	6.14145	5.84268	5.93329	6.88083	8.11909	9.54827	9.97046	9.73429	9.42788
Os08g0459300	Allergen V5/Tpx-1 related family protein.	expressed protein	8.64744	8.05922	11.1696	6.82184	6.80602	9.64102	6.48474	5.99635	5.59341	4.52199	4.74045	5.17122	4.94559	5.21698	4.83594	4.39927	4.76313	4.61032	13.1125	11.7387	12.9044	12.5342	13.0616	12.9184	6.70626	6.74684	7.31582	6.94396	7.62863	7.98132	13.1013	13.1081	13.6087	13.3042	13.2441	13.0682	10.3651	10.9665	12.1335	11.5605	11.1728	12.1156	12.7872	13.6773	13.4673	12.6549	12.9725
Os08g0474500	Conserved hypothetical protein.	expressed protein	3.86436	3.51422	5.84854	4.11386	4.54895	6.16989	4.15126	3.94724	4.13772	4.27393	4.21626	5.56447	4.08867	1.7203	3.58673	3.36718	3.26508	7.26049	8.23323	6.24951	8.50852	6.53717	7.60778	7.54838	6.60512	6.66058	6.87682	7.59553	6.43278	7.14397	1.91313	2.24212	2.7182	1.68684	2.70156	2.64143	1.26795	2.51145	2.39361	1.48706	1.2063	1.52841	4.41653	4.80721	5.71025	5.59891	5.34386
Os08g0475100	Esterase/lipase/thioesterase domain containing protein.	gibberellin receptor GID1L2, putative, expressed	8.54851	8.13429	9.10991	9.2545	9.80566	10.0011	8.84184	9.31817	9.35876	9.73803	10.6939	9.94266	9.60364	10.1735	10.177	9.39941	9.61554	10.0809	11.1281	9.8656	11.2486	11.1395	11.4474	11.4927	7.22582	8.19634	7.82117	10.1256	11.6025	10.912	8.04177	8.1572	7.784	6.46836	7.04037	7.03623	9.26823	9.53191	8.82776	7.90765	8.37069	8.43644	10.133	11.6308	11.3251	11.5266	11.5292
Os08g0483800	(No Hit)	No Hit	7.12254	6.87857	6.49273	4.9473	5.00488	5.01499	5.83189	6.02037	5.69064	5.6966	6.22483	5.72586	5.87544	5.65869	5.45703	5.30707	5.35573	5.0097	6.85117	6.43678	6.3485	6.56172	6.00065	5.77546	6.95605	6.10667	6.82464	7.16662	8.03405	7.59247	6.46877	6.81906	6.39371	6.02204	6.51854	6.25851	6.75392	7.27975	7.50051	6.97206	7.06766	7.44293	7.30865	6.929	6.59928	9.09618	7.38412
Os08g0526100	Nucleotide sugar epimerase family protein.	UDP-glucuronate 4-epimerase, putative, expressed	9.75223	9.72398	9.37868	9.2684	9.49885	9.23232	9.78342	10.2723	10.3605	10.6924	11.2425	10.4127	10.54	10.1887	9.87107	10.5453	10.639	10.4997	11.4215	11.3743	11.1473	11.8798	12.2535	12.2103	9.97868	9.92449	-1.98439	11.4169	12.5689	11.3219	9.79369	10.4592	10.5116	9.47615	9.50245	9.77446	9.75259	9.99576	10.2459	8.89485	9.15447	9.53285	11.8012	11.815	12.1409	11.2277	12.2336
Os08g0526200	Hypothetical protein.	expressed protein	5.73701	4.29729	4.04969	3.8007	6.00633	4.40585	4.62576	4.6023	4.18987	5.41089	5.01043	5.51582	3.3829	3.8137	3.38457	3.65779	4.16043	3.9512	6.3562	6.64208	5.83706	6.42761	6.03201	5.36756	6.51246	5.54117	5.18011	5.81822	6.84861	6.28977	5.46616	6.29876	5.76546	5.61327	5.93416	5.46345	5.98314	6.44194	6.91256	6.24937	6.15324	6.12423	6.59254	6.46709	6.73398	8.1626	7.13389
Os08g0531600	LIGULELESS1 protein.	OsSPL16 - SBP-box gene family member, expressed	2.35687	3.82914	3.16897	4.01746	4.33123	4.16529	4.42433	4.34748	3.62291	4.93828	5.69103	5.58618	3.86049	4.2352	3.99118	5.77017	5.61612	5.85911	6.93015	6.25207	5.82255	8.21817	7.58679	7.17382	3.32539	4.83544	5.30505	4.59936	5.65247	5.66385	5.58815	5.24726	4.94353	4.86125	5.72321	5.75781	6.88565	6.76076	6.40064	6.07191	6.26261	6.55364	9.43519	8.67337	9.04761	7.39767	8.53049
Os08g0535900	Conserved hypothetical protein.	No Hit	3.95943	4.55493	3.89784	5.30985	5.60172	4.69028	6.59254	7.06515	6.72781	6.77437	7.15994	7.01169	6.01793	6.38773	5.78005	8.16555	7.97674	6.83082	6.05622	4.54382	7.31893	5.21625	7.70515	6.70058	5.95249	5.03391	5.52065	5.86112	6.35621	5.16794	6.1319	5.59898	5.70426	5.91591	5.60046	5.85942	6.20682	7.0509	6.42353	6.5035	6.12219	5.88193	3.78641	4.01857	3.49803	7.64739	4.0675
Os08g0547800	Esterase/lipase/thioesterase domain containing protein.	CXE carboxylesterase, putative, expressed	8.19032	7.82648	9.04933	8.85513	8.82645	8.93626	8.5071	8.71889	8.93957	8.684	9.32393	9.30676	8.5053	8.83671	8.84571	9.69651	9.51532	9.94072	10.7786	9.35075	11.7308	10.427	11.369	11.5125	9.84134	9.40945	8.98287	10.6124	10.0362	10.0514	11.6109	11.6819	11.5121	11.6329	11.9631	12.257	11.9049	11.0695	11.4968	11.3225	10.9892	11.2759	8.10747	9.7451	10.4989	9.36322	9.94011
Os08g0561800	Conserved hypothetical protein.	expressed protein	14.2348	14.5317	14.4211	14.384	14.8038	14.6749	14.0767	14.8326	14.8976	14.753	15.3012	15.3084	14.3452	15.0009	14.5707	14.8977	14.9365	15.3619	15.5048	15.0405	15.1386	15.9125	15.8262	15.8609	14.9255	14.665	14.3863	15.8249	15.9531	15.5158	15.1727	15.5228	15.8479	15.1885	15.427	15.5834	14.9664	14.8603	15.4327	14.9324	14.9035	15.5898	16.4431	16.3168	16.6344	16.4445	16.3672
Os08g0566100	Protein of unknown function DUF239 domain containing protein.	carboxyl-terminal peptidase, putative, expressed	3.76661	4.30104	5.27215	3.76348	4.43951	5.72762	5.28265	5.64175	5.61896	3.37807	4.11777	4.63458	3.6211	3.76495	3.53227	3.87399	3.25313	3.44143	9.85307	9.53262	8.24706	10.1359	9.9063	9.88256	7.6952	6.68397	7.16596	6.50318	6.95675	7.07825	7.246	8.03828	8.09481	7.00343	7.63886	7.40445	6.40144	6.05193	6.37481	6.02014	6.5463	6.30924	10.7157	9.38754	9.66138	5.65755	9.56812
Os09g0123300	Protein kinase domain containing protein.	wall-associated receptor kinase-like 20 precursor, putative, expressed	10.8164	10.6805	10.5476	9.7582	9.6612	9.49539	10.913	11.2241	11.123	10.1544	10.2944	9.72905	11.0804	10.9073	10.5995	10.041	10.3511	10.3442	10.4364	10.7929	10.9708	10.6176	10.8441	10.8001	10.8422	10.197	10.6056	10.6407	10.5125	9.94923	11.2211	10.9076	11.4793	11.3776	10.5272	10.8008	10.9506	10.758	11.3898	10.8585	10.9179	11.2577	10.8	11.5061	11.3667	10.6413	10.7067
Os09g0237600	Protein kinase domain containing protein.	serine/threonine-protein kinase 16, putative, expressed	4.81364	4.38284	4.96963	6.35469	5.46691	5.02503	5.12306	3.73405	3.917	5.07493	4.74226	4.75738	4.24438	4.08663	3.84284	4.22401	4.52463	4.81421	5.2576	5.07247	5.48504	6.56332	6.4555	6.58694	5.26122	4.74521	5.18088	5.08318	4.82109	4.67188	5.87306	5.12301	5.64094	6.39249	5.18091	5.65935	4.98986	2.73002	4.68776	4.87806	3.83931	5.98394	5.57508	6.39569	5.94268	6.21722	6.46084
Os09g0274100	Conserved hypothetical protein.	expressed protein	5.01662	5.60771	4.58565	6.06019	7.00054	5.03706	5.61817	5.20735	4.93038	7.7241	7.29202	7.06553	5.43254	4.87641	4.71446	7.13476	7.1131	6.76377	6.71269	6.95684	6.17971	7.21564	6.5641	6.28805	6.68457	6.6285	7.52052	7.99854	7.56155	7.56521	5.28028	4.73141	4.85078	5.27089	4.9944	4.60193	3.68245	4.59439	5.04172	5.57525	4.96162	5.40834	7.41432	6.80503	6.5496	7.08137	7.7224
Os09g0321700	(No Hit)	No Hit	8.8435	9.10385	9.2458	9.10095	9.34908	9.4941	8.54283	9.27368	8.97834	8.53644	8.88405	9.68723	6.95715	6.80655	7.04344	7.07713	7.4104	7.8221	7.36829	8.48286	8.79306	7.27599	7.567	7.37946	8.20919	8.31717	8.5865	7.96986	9.70295	8.40962	7.8647	8.30498	7.99392	7.79924	8.27094	8.33542	12.3895	10.0327	8.80796	10.7095	9.81273	8.50079	9.5575	7.30008	6.77822	9.14146	6.92217
Os09g0333500	PDR-like ABC transporter (PDR3 ABC transporter).	pleiotropic drug resistance protein 4, putative, expressed	1.21044	2.16605	1.73047	2.58351	6.35289	1.42046	2.51224	1.57429	2.41678	2.84968	3.10423	1.98504	3.92428	4.43088	3.51747	4.77288	4.34681	4.17312	3.11253	3.8655	4.44243	5.01327	4.70931	5.81096	6.70087	5.64195	7.44919	6.63899	7.69066	7.58537	1.88471	1.37414	1.17495	1.33564	2.51815	2.07573	2.20364	1.4433	2.37885	1.70027	1.10601	0.816093	0.73096	1.94282	2.75617	4.19287	1.46979
Os09g0341500	Cyclin-like F-box domain containing protein.	expressed protein	2.57355	3.0401	5.49376	3.25118	3.75881	8.33173	3.75517	3.74018	3.74502	3.4766	3.50952	2.46134	2.30696	1.74	2.55585	3.49458	3.35437	6.62164	4.37843	5.7019	6.15779	4.67654	4.95086	4.73869	3.15549	2.72159	4.25183	4.36847	4.06217	4.19649	6.13014	6.58606	7.49263	6.83046	7.63779	7.01229	6.29057	7.4547	7.17327	7.74226	6.72587	6.51252	2.33829	1.16655	2.10925	4.19039	1.61779
Os09g0341600	Cyclin-like F-box domain containing protein.	OsFBX319 - F-box domain containing protein, expressed	1.40698	1.89644	3.75791	2.25187	2.60741	2.70574	2.51608	1.9437	2.14626	1.86734	2.21924	2.4515	0.383591	1.39861	5.11083	1.8954	1.11724	2.22988	2.24738	4.74984	4.63906	3.11355	3.534	2.95096	3.05671	-0.738817	-2.0423	2.5053	2.09119	3.80208	4.87245	4.72043	6.13247	5.31218	5.76618	4.92693	4.52297	4.9863	5.95418	5.80623	4.93048	4.46618	3.28967	2.60731	2.68112	3.59412	2.51591
Os09g0363900	Mandelonitrile lyase-like protein.	HOTHEAD precursor, putative, expressed	1.03366	1.96315	1.49683	1.12295	1.9361	0.144126	0.195977	5.71448	2.80085	1.45497	1.29283	0.874041	3.22396	0.624142	0.603549	-1.05279	1.79701	1.73768	13.2846	12.6062	12.3393	12.3836	12.3286	12.3227	3.08793	4.05666	4.01471	1.42753	0.111669	0.547405	2.91734	1.89614	2.30684	2.1721	1.179	2.05804	2.03495	-0.0974182	3.74589	3.68121	2.30811	2.58281	12.6438	12.6648	12.557	7.80401	11.9771
Os09g0372700	ASC1 (Alternaria stem canker resistance protein).	ASC1, putative, expressed	7.11238	7.20605	7.11292	8.63183	8.57714	8.32654	7.7409	7.00985	6.55737	7.76818	7.54267	7.52179	6.19328	6.23189	6.4211	7.246	7.67801	6.85529	9.56782	8.39073	9.7722	9.4082	10.212	10.3849	6.50905	6.28054	6.9308	6.85683	7.27116	6.90925	9.91107	9.64524	10.2239	10.1783	9.22546	9.52779	7.50016	8.17437	9.25058	9.01969	8.55058	9.12069	10.3852	10.7645	10.6755	9.43608	10.6981
Os09g0426000	Protein of unknown function DUF6 domain containing protein.	auxin-induced protein 5NG4, putative, expressed	9.00212	8.9605	9.05632	9.652	9.69446	9.57676	8.37763	8.15595	8.09093	8.17827	8.64507	8.91033	9.04096	9.20133	8.9865	9.61751	9.37936	9.21675	9.37431	9.78846	9.22593	9.73457	9.55196	10.0601	9.9082	9.57158	10.4784	10.5289	10.076	10.4864	8.50765	8.53479	9.2972	9.52079	9.02354	10.3215	6.70815	7.19315	8.26636	8.16114	8.13925	8.80869	8.80657	8.92324	9.00887	7.40724	9.47346
Os09g0426100	Protein of unknown function DUF6 domain containing protein.	auxin-induced protein 5NG4, putative, expressed	6.9312	6.96711	7.76697	6.52752	6.38781	7.30443	6.09468	6.19147	6.68293	5.55536	6.23586	7.00831	6.45623	6.62306	7.00563	6.01012	6.06805	6.95877	7.26505	7.06213	7.55784	6.64422	6.92342	7.41411	6.39217	6.89684	6.22387	6.66177	6.11195	6.91129	7.3426	7.20868	7.50323	7.21669	7.51906	7.2307	7.88494	7.2654	7.39594	7.90934	7.38879	7.29764	8.06483	8.51625	8.617	7.01023	7.57676
Os09g0432000	(No Hit)	No Hit	8.89214	9.05016	9.3571	9.05947	9.39212	9.51576	8.9027	9.26696	9.09103	8.86261	9.06368	9.72649	6.93632	6.92419	7.35099	6.99232	7.63166	8.17481	7.59072	8.53964	9.11604	7.416	7.62358	7.70956	8.39668	8.4561	8.60935	8.18419	9.72497	8.38786	7.88606	8.30096	8.00072	7.74358	8.39646	8.30852	12.4043	10.1821	8.80227	10.8219	9.90848	8.51775	9.59037	7.34643	6.70097	9.44881	7.17594
Os09g0432700	Conserved hypothetical protein.	No Hit	5.37224	4.39707	3.60993	4.6696	3.77116	5.65313	3.7105	2.83812	2.91809	5.23669	3.26732	4.97332	4.83189	2.77199	3.4644	3.53314	4.39611	6.02687	3.94763	3.17985	4.07954	4.26797	4.18892	5.00926	3.95058	4.84137	4.83217	5.62632	4.50659	4.90154	3.85238	3.87232	3.70639	3.79763	4.61465	3.83677	4.80759	4.42878	4.32914	4.52176	4.15123	3.75944	4.26925	4.22376	3.67848	5.92324	5.03223
Os09g0432900	Glycosyl transferase, family 31 protein.	hypro1, putative, expressed	8.87647	8.21622	10.0949	8.30161	8.55279	9.92696	8.01119	7.78221	7.60794	7.00332	7.41668	8.31995	6.81633	7.03118	7.02802	7.64426	7.31021	7.94521	10.9314	11.0426	10.5649	10.9197	10.6012	10.7682	8.24389	8.44347	8.74992	10.3811	9.54587	10.4416	11.4626	11.5588	12.0982	11.7473	12.1166	11.8441	10.7002	10.1881	10.9118	10.208	10.145	10.7736	5.59772	8.66242	7.37399	11.6294	7.93365
Os09g0433400	Non-protein coding transcript, uncharacterized transcript.	No Hit	3.05281	3.60928	3.5249	3.90786	4.05614	3.98254	3.98259	3.85785	4.02616	4.89679	5.03971	5.11173	3.72463	4.01893	3.98752	4.45972	4.15391	4.77193	8.72116	8.12824	7.08604	8.3962	7.76783	7.49221	5.88935	5.85202	5.80018	6.24264	5.84917	4.71929	5.80989	6.39133	6.59447	5.60412	5.33391	5.36755	4.56846	4.728	5.22092	5.18749	5.30621	5.46219	8.27809	7.97379	7.87775	6.17896	7.90928
Os09g0437100	(No Hit)	OsSAUR37 - Auxin-responsive SAUR gene family member, expressed	3.68429	2.74411	3.97005	3.67515	4.36127	4.69056	3.24678	2.62761	2.78022	3.19584	3.82652	3.01511	3.47609	3.69965	3.6694	4.34028	4.21772	4.85437	9.61626	7.83703	8.41536	8.23223	8.84717	8.60405	4.71812	5.7343	5.87499	4.49353	4.41926	5.58667	6.92182	6.88402	7.54143	6.72358	6.83817	6.53105	6.58502	6.09714	7.01358	6.31071	6.13685	6.84824	10.8297	8.90176	9.84479	8.41694	10.2005
Os09g0442900	Axi 1 (Auxin-independent growth promoter)-like protein.	growth regulator related protein, putative, expressed	10.2074	10.0567	9.13334	10.6307	10.475	9.3328	10.8578	10.757	10.4592	11.2783	11.1227	10.3835	10.4667	10.4706	10.2318	10.1423	10.7509	10.2142	9.43963	10.3045	9.82876	10.6122	10.2745	10.386	10.4645	9.83083	10.7337	11.1993	11.1283	10.6493	10.0565	9.61416	9.87711	10.4224	9.40743	9.82631	9.65514	10.0708	10.1688	10.1459	10.1836	10.3286	10.9718	10.7908	10.6057	10.7959	10.7424
Os09g0452200	LysM-domain GPI-anchored protein 1 precursor. Splice isoform 2.	lysM domain-containing GPI-anchored protein precursor, putative, expressed	7.76018	5.23745	5.53334	2.57184	3.5722	5.5901	5.1078	4.44227	4.6224	4.31424	3.63765	5.69266	0.679701	0.687767	5.80325	-1.22928	2.26804	4.53743	9.51344	9.2547	8.91815	10.0357	10.1707	10.244	3.05078	8.46463	5.39246	5.09099	6.01729	5.9722	10.5539	10.4203	10.5621	10.5281	10.2703	9.57384	7.68947	8.07011	9.52346	8.64654	8.84446	9.93177	11.372	11.7577	11.6488	6.05015	10.8083
Os09g0459500	Hypothetical protein.	hypothetical protein	7.91433	7.95239	8.33415	8.35795	8.71064	8.43738	10.8609	10.8875	10.7462	10.641	10.3421	10.9034	10.8862	11.0619	11.1781	10.9141	10.9138	11.0895	9.55673	8.79915	10.3609	9.57652	10.5359	10.6329	10.2131	9.81702	9.84639	11.222	10.8538	10.4682	6.61037	6.66633	5.73844	6.23356	6.33331	6.12026	6.84746	7.6729	7.82885	8.0618	7.52017	7.31848	9.03151	11.2083	10.6325	13.5544	11.1769
Os09g0463300	Protein of unknown function DUF547 domain containing protein.	expressed protein	12.1548	11.5277	12.2031	9.56532	9.7978	9.96024	10.6606	10.5785	10.0842	10.6088	10.7189	9.9828	8.57508	9.08864	9.25784	8.86146	9.88432	8.94035	12.5455	10.6728	12.5903	12.057	12.8902	12.8449	9.05669	8.94816	9.09831	10.4512	10.7523	10.1286	9.86456	9.79777	10.0897	9.934	9.67168	9.23053	7.37996	7.99606	8.95761	8.47729	8.24423	9.30168	13.1334	13.977	13.9729	12.2794	14.1214
Os09g0470500	Homeodomain leucine zipper protein.	homeobox associated leucine zipper, putative, expressed	9.71017	10.0955	10.0213	9.78265	10.3137	9.99022	10.7363	11.2823	11.4379	10.2483	10.6562	10.8096	10.3785	11.0936	11.0268	11.0334	11.5021	11.87	10.5156	10.0485	10.0726	10.0655	9.71495	10.1285	10.2301	9.88358	9.56595	10.3382	9.92823	9.98194	8.41756	9.20107	9.65232	8.60235	9.13936	9.69257	9.28721	9.4647	9.46636	9.04192	9.34157	10.0083	11.2118	10.6483	10.9525	10.0704	10.9626
Os09g0470900	Conserved hypothetical protein.	AGAP005770-PA, putative, expressed	10.2485	10.2993	10.0558	10.6853	10.611	10.3924	10.3969	10.1348	10.2894	11.7148	11.5637	11.007	10.4264	10.7274	10.6978	11.0254	11.3291	11.4644	10.8435	10.8562	11.1304	10.7304	10.8011	10.9989	10.1022	9.87222	9.96767	11.2832	10.8216	10.6706	10.7112	10.406	11.049	10.7701	10.3078	10.8152	10.0253	10.4831	10.5633	11.2724	10.8776	11.1573	11.4451	11.3402	11.3046	11.6173	11.61
Os09g0482900	UDP-glucuronosyl/UDP-glucosyltransferase family protein.	UDP-glucoronosyl and UDP-glucosyl transferase domain containing protein, expressed	8.05141	7.36482	8.38022	6.03524	6.6213	6.19285	7.99735	8.52781	8.2519	6.45344	6.51305	6.72882	9.37782	9.76715	9.61321	8.27467	8.25109	8.22252	9.18203	9.91741	8.97786	8.77874	8.10473	8.73829	8.82494	8.59131	8.40681	9.71921	8.65451	7.70735	8.62029	8.60789	8.4998	8.38141	8.01901	8.19945	7.24439	7.77107	8.05274	8.19783	7.62918	7.79618	7.78145	7.45003	6.98735	7.82744	7.47078
Os09g0493000	Conserved hypothetical protein.	expressed protein	5.76657	6.42933	6.88335	6.39145	6.96875	6.18613	6.88802	6.15367	5.92418	7.64151	7.73603	7.65087	6.92669	7.07551	6.5688	7.45074	6.92587	7.37767	6.15855	5.65111	5.87861	5.54608	6.12533	5.34483	6.87793	6.56467	5.68475	9.13669	8.41221	7.19481	6.89334	6.70057	6.74778	7.21562	6.91764	6.52594	8.59066	8.46076	8.49496	8.7009	8.25891	9.17118	6.40287	6.83554	5.56473	10.0807	6.08047
Os09g0507100	SBP domain containing protein.	OsSPL18 - SBP-box gene family member, expressed	6.65463	6.44688	6.76813	7.10409	7.18016	7.02961	7.67371	6.6296	7.00503	6.8401	7.34452	7.03523	5.54243	5.21636	5.82353	6.22394	6.29938	5.95001	8.53289	8.4339	8.47105	9.65369	9.48726	9.72084	8.34985	7.93921	7.51816	8.58066	9.05524	8.79867	6.62387	6.70513	7.33789	6.61983	7.05011	7.4031	7.56475	6.81829	7.17983	6.03573	6.86944	6.78427	9.83041	9.37106	9.73007	8.08816	9.4307
Os09g0521100	Hypothetical protein.	3-ketoacyl-CoA synthase precursor, putative, expressed	3.10004	3.54751	3.61651	1.4061	3.79117	2.89227	2.58928	3.78743	2.78768	2.27282	2.43176	2.3768	4.12573	2.72156	3.5245	3.05321	3.19601	2.50526	9.77169	10.3061	2.9605	10.8803	9.79317	9.99809	4.27689	3.90543	6.40292	1.34704	2.41141	3.99967	1.84986	2.20277	2.57397	1.39727	0.693121	2.69914	3.44206	-1.2841	2.1563	0.347289	-0.930022	2.90086	9.65829	8.32085	8.83001	4.70487	8.87548
Os09g0536800	Conserved hypothetical protein.	No Hit	4.00979	3.68955	4.44611	4.40389	3.60416	3.97899	4.68117	3.63063	4.04284	4.17058	3.44192	3.7014	3.09736	2.91088	3.2249	3.83506	3.28302	3.65391	4.70151	4.85902	4.36162	4.65457	5.1442	4.71471	5.05798	3.72896	4.29186	3.54954	3.92959	4.41472	6.03319	5.27162	5.29358	6.00405	5.71823	5.38658	4.70645	4.86889	6.61244	3.72021	4.63618	4.8395	5.90104	6.05962	5.6317	5.8428	5.75953
Os09g0539000	(No Hit)	expressed protein	5.9866	5.09638	6.47552	6.79453	6.70304	7.08255	6.45849	6.03845	6.17027	6.29621	6.5064	7.00564	6.02813	6.00842	5.75763	5.71758	5.22723	4.69228	10.9015	10.3051	8.2901	12.3178	12.0501	11.7736	7.42028	6.49819	7.36884	6.25582	7.72642	7.2311	12.4815	12.126	12.1369	12.7562	12.1405	11.7389	9.4092	9.4713	10.8825	9.73604	10.095	10.7717	12.5334	11.4678	11.7057	7.81692	12.2974
Os09g0546500	Auxin induced protein.	No Hit	3.43671	3.66624	3.63508	3.08114	3.96998	3.39848	3.79508	3.64838	4.42284	2.68025	3.4706	3.67348	4.17184	2.51161	2.20696	3.71038	3.44178	1.98554	7.10653	6.03346	6.84831	7.28672	6.99836	7.79847	4.04999	5.22646	6.68221	3.34905	4.36565	5.37041	3.09551	4.03529	3.63316	3.94854	4.2256	2.52196	5.77933	4.15005	3.04815	3.26755	4.10382	2.7411	7.70231	7.80103	8.59526	7.5718	7.42901
Os09g0548700	Conserved hypothetical protein.	flavin-containing monooxygenase family protein, putative, expressed	6.25534	4.59515	6.31596	4.59399	3.87027	5.54438	6.41632	6.59712	7.80545	4.45362	5.39087	6.14662	3.52225	4.82756	5.51624	4.08882	5.29757	6.01279	8.79994	8.60007	5.64443	8.96143	8.37457	8.58283	4.07966	5.12374	6.56293	5.51598	5.86135	5.5781	2.06631	0.978882	2.3468	2.01146	-1.08851	2.35717	4.85794	0.85787	2.9948	2.02715	0.548561	3.66462	8.36947	7.82759	7.86383	5.3767	7.85768
Os09g0552500	RmlC-like cupin family protein.	cupin domain containing protein, expressed	2.58376	1.57855	3.1757	2.95063	2.11082	2.38836	2.22794	2.53857	3.44859	2.18789	2.18079	3.31953	1.30791	3.181	3.59502	2.95048	2.62912	1.76318	9.02561	7.27048	1.88727	7.78319	5.26252	5.66174	6.29415	4.64956	8.20649	3.92775	3.46309	5.21626	4.61037	5.52969	2.34708	4.34434	6.27529	4.88903	4.65723	5.06894	4.31806	2.70063	4.61167	3.13278	2.37023	2.8056	1.2516	2.42025	6.49914
Os09g0555500	Phytoene synthase (Fragment).	phytoene synthase, chloroplast precursor, putative, expressed	7.87633	7.4309	7.90877	5.22035	5.14523	5.69516	7.38405	6.90457	7.2898	4.99979	4.99337	5.63905	6.98966	7.24653	7.44773	5.53335	5.9841	6.3926	4.64136	4.94969	5.49966	4.9008	4.69836	5.00849	6.26076	6.56899	6.41754	8.01928	6.46678	7.25984	3.92602	3.83484	3.94798	3.98685	4.24212	4.42679	4.92803	5.0737	5.39416	4.91365	4.68558	5.05964	6.32004	6.85302	7.39075	8.7602	7.50357
Os09g0559500	(No Hit)	expressed protein	4.62788	4.93681	4.64746	5.1017	4.95064	4.87157	5.75621	6.10768	6.53733	4.62379	4.86788	4.38338	7.16783	7.63517	7.19723	5.89478	5.90436	6.7342	8.35187	7.88379	5.11789	9.1083	8.67261	8.09102	3.93912	3.13648	4.73108	4.84953	4.1274	4.42397	2.72257	2.95649	2.79457	3.33789	3.62658	2.67458	4.73855	3.96699	3.59909	3.92988	3.33188	4.01251	7.50262	6.49989	6.53491	3.66416	7.00257
Os09g0567500	Fatty acyl coA reductase.	male sterility protein, putative, expressed	4.74661	4.579	5.86796	4.42804	4.2881	5.06471	4.97997	3.83332	4.64019	3.93954	2.98894	4.35253	3.29468	3.34905	4.62814	4.39272	4.82658	4.80242	12.1084	11.2592	13.2961	12.411	13.0282	13.1538	5.34451	4.71222	4.62236	4.9686	4.83113	5.73686	11.9309	11.3038	11.7231	12.3094	11.2187	11.2529	10.3868	9.72051	11.4703	10.5704	11.0577	10.5887	9.91874	11.0248	10.5449	8.95067	11.1733
Os09g0567900	Inosine/uridine-preferring nucleoside hydrolase domain containing protein.	inosine-uridine preferring nucleoside hydrolase family protein, putative, expressed	4.80794	5.00132	5.30634	4.02567	4.82798	5.56168	4.65694	4.89583	4.58447	3.75929	3.87258	4.17498	3.969	4.28294	4.49093	5.48461	4.76315	4.78138	5.95285	6.5724	6.47356	5.86845	6.08493	6.51081	6.26066	6.53815	6.3247	6.43457	5.42385	5.25171	6.84425	7.16674	7.57876	7.37317	7.1589	7.64377	5.29345	5.58864	6.76475	5.9624	5.72824	6.87632	3.79698	6.55568	6.27682	7.47133	6.56465
Os10g0100900	Conserved hypothetical protein.	No Hit	6.16913	6.14402	5.87653	7.00053	7.47512	6.75947	8.42451	8.78079	8.59184	7.71629	7.79076	7.75503	7.43705	8.40881	8.15171	8.69485	8.91975	9.50854	6.07237	6.55051	5.85749	7.82979	6.77993	7.21948	8.65437	7.8863	8.11334	8.49954	8.70548	8.18345	6.63947	7.00243	6.90102	6.65712	6.90416	6.88315	8.14322	8.66542	8.59904	8.15463	8.47168	8.16802	7.34115	6.64335	6.62547	5.51896	7.52124
Os10g0132500	Disease resistance protein family protein.	transposon protein, putative, CACTA, En/Spm sub-class	6.67732	5.9012	7.57994	5.71658	4.98461	6.08853	7.14457	6.79233	6.83824	7.06837	6.94391	6.1307	7.49648	6.9039	6.20988	5.79522	6.38585	5.21309	9.14861	9.05694	8.89884	9.31527	9.38684	9.21815	6.45948	6.80247	6.40959	6.83052	8.6063	6.87798	8.53718	8.385	7.86569	8.69451	8.38075	8.23634	6.85708	6.80915	7.70536	7.55861	7.13347	7.64967	10.0284	9.93147	9.71253	10.1627	10.0402
Os10g0149000	Protein of unknown function DUF1210 family protein.	POEI5 - Pollen Ole e I allergen and extensin family protein precursor, expressed	0.0559045	2.69992	1.38305	2.15098	1.87687	2.27873	2.0714	3.00412	1.69677	2.13398	2.30284	0.283611	1.455	2.21474	2.01244	0.824281	2.09192	1.86585	10.8984	5.25345	10.6181	7.93518	10.4942	10.5392	2.70344	3.3939	4.71545	2.79653	2.54787	-2.40157	0.914894	0.604311	0.80033	0.881491	-0.531051	0.11645	4.78739	0.266099	0.351585	2.27942	1.89106	0.38195	4.5914	13.841	12.277	8.1435	13.3594
Os10g0149100	(No Hit)	POEI6 - Pollen Ole e I allergen and extensin family protein precursor, expressed	-0.333273	0.220814	-0.425357	1.27276	2.61566	0.0651805	2.2982	1.07299	1.39516	2.09997	0.380229	1.41585	0.974882	0.752272	0.844506	2.01612	2.30501	2.23903	10.5312	4.83271	10.3758	7.59033	10.1741	10.3135	0.161236	4.17055	3.82152	1.06051	2.97763	4.17808	1.6794	-0.9233	2.26832	1.88299	-0.888157	-0.30185	3.94476	0.883486	0.305633	2.21352	0.0902948	-0.516628	4.30406	13.519	11.8366	7.86499	13.2179
Os10g0149200	(No Hit)	POEI7 - Pollen Ole e I allergen and extensin family protein precursor, putative, expressed	1.97957	2.78432	4.62047	2.604	2.95574	3.95644	2.09619	2.54779	3.41171	2.64241	1.91414	3.62031	2.43927	2.91709	2.81146	0.774049	2.65116	1.97706	12.4758	7.49333	11.7394	8.60982	10.9257	11.2467	-1.27118	2.65651	5.36172	2.3343	3.30024	3.65923	1.39926	1.10772	3.36268	2.07833	0.783467	3.35065	5.23993	2.2194	2.98782	3.39056	2.25973	2.69537	5.98009	14.6188	14.9054	9.0803	14.3151
Os10g0149400	Protein of unknown function DUF1210 family protein.	POEI8 - Pollen Ole e I allergen and extensin family protein precursor, putative	1.37789	2.12373	2.07386	2.93552	2.30397	0.974746	1.21487	2.60359	1.86675	1.61679	1.81513	0.610301	4.14825	2.90743	1.24149	3.02174	1.75034	2.06727	10.7071	5.05732	10.2713	7.80474	10.3262	10.2288	-0.814737	4.82067	3.29671	0.476425	2.15453	3.59423	0.626542	-0.265357	1.39289	2.33671	-0.867771	0.988789	4.33399	0.644708	2.1513	2.31859	0.253355	1.33196	4.45981	13.6513	12.0461	7.81323	13.1204
Os10g0150000	Protein of unknown function DUF1210 family protein.	POEI10 - Pollen Ole e I allergen and extensin family protein precursor, expressed	1.21991	2.68835	2.04665	0.617591	3.07053	1.78637	0.66593	1.81907	3.433	0.88471	0.619807	2.63122	2.94518	1.98316	1.83035	2.40941	1.93163	1.7369	11.5891	6.2966	10.1181	7.30337	9.68684	9.82022	4.04939	0.968546	4.81204	2.48871	2.26891	3.26204	5.35859	4.57883	4.30167	5.61425	5.40443	5.23157	5.28358	5.20749	5.73225	3.98483	4.1149	5.16002	4.97054	14.7884	14.5154	10.4662	14.213
Os10g0351500	Protein kinase domain containing protein.	ATP binding protein, putative, expressed	1.95522	2.48908	3.68084	2.11623	2.56749	3.53485	2.21841	1.73426	2.05039	2.3016	2.55811	1.13683	2.70252	1.30979	0.612209	2.09227	1.37621	1.93297	3.682	2.25923	2.72645	2.78084	2.52691	3.87912	2.0557	3.33712	3.02723	1.81947	2.27456	3.24532	8.40949	8.37032	8.4099	8.06939	8.11028	7.18958	5.4114	6.51831	5.88038	6.64926	5.90012	6.98922	0.928548	1.65578	2.80576	0.729174	2.0092
Os10g0410200	Protein of unknown function DUF635 family protein.	No Hit	4.01762	4.43252	4.51075	4.13879	3.72118	5.14493	4.22202	5.00226	4.6687	6.17638	4.24606	5.56952	5.47178	4.71599	4.89645	4.70781	4.40072	5.31572	7.15072	5.86717	6.32914	8.62428	8.12625	7.85132	5.16609	4.86872	4.20106	4.36357	4.76074	5.46968	7.82404	7.13623	7.47865	8.20918	7.35892	6.89144	6.65785	5.7882	6.21644	5.72993	6.04489	6.86598	9.43406	9.66354	9.7676	6.78601	9.98586
Os10g0412700	Thaumatin, pathogenesis-related family protein.	thaumatin, putative, expressed	3.64005	3.58688	3.20182	3.14206	3.30443	2.53919	2.52908	2.89893	4.8206	3.86644	3.12706	3.45938	4.43828	4.82248	4.71336	4.95995	4.46797	3.9713	7.53376	6.26253	7.15219	8.22471	7.82736	8.03138	3.49132	4.23274	2.91342	3.12153	2.97597	3.20263	8.05062	7.57177	7.46505	7.97502	7.41414	6.69974	5.28911	5.55959	6.99002	7.17921	6.4722	5.99599	7.87447	8.86223	9.46241	3.68357	9.36704
Os10g0413400	Phospholipid/glycerol acyltransferase family protein.	glycerol-3-phosphate acyltransferase, putative, expressed	5.54605	5.89231	6.54591	4.76599	5.50895	6.17995	4.00777	4.97209	4.97288	4.10461	4.8268	5.19881	4.86915	5.27255	5.67939	4.86425	4.8489	5.20596	6.11049	5.36242	6.86578	5.17498	5.94401	6.69787	4.63004	4.74082	4.8315	4.8226	5.11728	4.5794	4.31342	4.44364	5.13144	4.7348	3.4425	4.80947	6.0972	4.50861	4.7272	5.2956	4.45396	4.51009	4.25671	5.5127	6.03752	4.78226	5.56448
Os10g0447900	Conserved hypothetical protein.	Citrate transporter protein, putative, expressed	13.8487	13.3976	14.0223	13.9885	13.6985	14.4749	13.8427	13.3445	13.5649	14.6021	14.7411	14.085	13.2051	13.2295	12.9026	13.105	13.0334	13.7025	12.6689	13.2428	13.9952	13.0592	13.3254	13.8309	11.9106	11.4886	11.4222	13.5217	14.19	13.6496	10.2769	9.97683	10.0625	10.6483	10.5669	11.8356	11.6929	11.207	10.749	11.5182	11.0369	11.7042	10.7811	12.4733	11.7571	14.5677	13.4229
Os10g0456400	Conserved hypothetical protein.	expressed protein	8.09838	8.48115	8.70205	8.59886	8.90357	8.69729	8.54944	8.94692	8.88378	9.20422	9.45633	9.48661	9.41649	9.53417	9.162	9.27501	9.37368	9.84553	11.1241	10.966	10.9111	11.627	11.508	11.4726	10.0818	9.9093	10.2337	11.0032	10.4725	10.7153	11.1406	11.1564	11.3763	11.0962	10.8959	10.8677	10.1832	10.2392	10.8024	9.77392	10.6347	10.8021	11.9646	12.2801	12.3856	11.7145	12.1736
Os10g0463600	RNA-directed DNA polymerase (Reverse transcriptase) domain containing protein.	No Hit	8.16871	7.58658	8.93697	8.75013	8.30541	8.65499	8.07609	7.9075	7.94115	7.94485	8.53327	8.20267	7.92109	8.37904	7.69726	8.77075	8.38086	8.56158	10.1497	7.99454	10.3251	8.6478	9.66058	9.53434	7.26244	6.74202	6.74296	8.47772	8.27937	7.33413	12.723	12.2018	12.6968	12.8444	12.1112	12.5031	10.1373	10.459	11.2319	10.6899	10.7844	10.7027	5.42744	10.0943	9.58348	12.5745	10.2787
Os10g0468600	Hypothetical protein.	expressed protein	4.37903	4.39642	4.58222	4.01053	4.1629	4.76107	4.7291	3.98291	4.16648	4.28041	4.78781	5.25553	2.83655	3.26521	2.79907	2.48646	2.19765	3.81057	8.7954	8.00147	8.38854	8.68568	8.68564	8.76835	5.39682	5.22001	5.99826	5.28646	5.62403	6.42662	7.93463	8.04585	8.124	8.08349	7.70872	7.70981	6.52336	6.81714	7.255	7.18051	6.89343	7.25317	10.1694	9.94359	10.1787	8.88026	10.0135
Os10g0479500	Conserved hypothetical protein 730 family protein.	possible lysine decarboxylase domain containing protein, expressed	7.13073	7.04438	7.12965	8.11994	8.11444	7.89279	6.19533	5.80329	5.40205	8.57832	7.99195	7.64866	3.80382	4.7736	5.02852	6.10296	6.41451	6.24312	8.14525	9.16352	8.37786	9.50426	8.6813	9.1824	8.4775	7.80586	8.35943	7.88628	8.49802	8.62028	4.96546	5.28413	4.56064	4.93809	5.89169	5.61879	6.31478	6.06921	5.29104	5.33248	5.88809	5.89535	9.01095	8.84876	8.9689	8.87992	8.57641
Os10g0480200	Homeobox domain containing protein.	START domain containing protein, expressed	7.02687	7.29394	7.56214	6.91506	7.56193	7.28666	7.13432	6.68203	6.17408	6.01228	6.61206	6.22305	6.75978	6.57244	6.86402	6.593	7.17572	6.67875	7.70089	7.0712	8.10422	7.50929	8.33626	8.59929	5.53351	4.91891	5.13151	6.07547	6.46021	6.08746	5.94565	6.54054	6.68687	6.2557	6.07031	6.26888	6.90076	5.93448	6.27623	5.91377	6.03942	6.48832	9.73098	8.95696	8.70465	8.92773	9.36938
Os10g0493400	Hypothetical protein.	No Hit	4.58445	4.9404	4.92979	3.59862	3.60427	4.18082	3.8819	4.41493	6.58121	3.58118	4.21636	4.99299	4.319	4.44545	5.83686	3.71833	3.59371	4.45755	5.31259	4.52539	4.45658	5.28446	4.88124	4.93392	4.33438	4.807	5.99062	5.56819	4.83496	5.53366	4.26222	4.9465	4.9247	4.26624	5.48182	4.98904	5.51243	5.10505	5.71041	4.79478	4.66814	4.82481	5.61355	5.10502	5.18226	4.14179	5.2388
Os10g0493700	(No Hit)	hypothetical protein	5.67223	5.43279	5.83997	6.294	6.08756	5.97096	7.18371	5.28534	5.66494	7.43147	5.8649	6.76854	5.75637	4.77474	5.17692	7.20683	5.84603	5.52688	6.57724	6.44274	6.98113	6.38754	6.75311	6.86818	7.08862	7.75981	6.89613	9.22618	7.53715	6.4378	7.84707	7.50532	8.03746	8.11257	7.14639	7.61329	8.09199	7.97704	8.57104	8.23949	7.6362	8.43169	6.66459	6.57902	5.86591	7.70564	6.75243
Os10g0497700	Phytochelatin synthetase-like conserved region family protein.	COBRA, putative, expressed	7.83178	7.09062	7.67575	6.53853	6.67903	6.8389	6.76849	6.61021	6.10048	6.14169	6.20577	5.7677	5.6163	4.98836	4.71232	4.79192	5.30181	4.44786	6.08826	7.22172	7.87619	6.42237	5.57588	5.72406	6.32726	6.20553	5.60602	5.84156	6.70247	5.04895	6.17144	6.4562	6.73927	6.56492	6.28133	6.94106	6.57839	6.59108	7.92443	6.69008	6.15288	6.5687	3.39327	2.8189	2.83393	4.7029	1.80889
Os10g0498200	Epoxide hydrolase family protein.	hydrolase, alpha/beta fold family domain containing protein, expressed	6.50707	6.15475	6.76196	8.33579	8.26755	8.11888	8.40826	7.97398	7.8612	8.50923	8.26081	8.06151	7.01362	7.54688	7.62866	8.1207	8.25507	8.28527	6.38823	6.85451	6.92367	7.02051	6.70285	7.19552	7.84095	7.88091	7.97549	9.15431	9.04342	8.91305	4.62005	4.77976	4.64767	5.36545	5.04202	5.38774	4.77646	6.02915	5.61132	6.12157	5.71841	5.99785	5.3696	6.50174	6.43791	9.25361	7.103
Os10g0505000	Plant lipid transfer/seed storage/trypsin-alpha amylase inhibitor domain containing protein.	LTPL158 - Protease inhibitor/seed storage/LTP family protein precursor, expressed	2.57009	2.18516	2.74773	5.63095	2.47799	2.94162	2.56009	2.16894	0.355678	1.33251	2.36599	3.47135	2.86558	3.42372	1.44006	3.5506	2.38215	3.3156	1.69808	2.582	2.66122	2.80879	3.33134	2.78357	4.32036	4.36308	4.3849	2.87485	5.66853	5.85974	2.69	2.55095	2.14543	2.38172	2.90904	2.60859	4.19894	2.98947	2.42752	4.22007	2.57808	2.7357	2.03233	2.06596	2.17087	5.86325	3.21196
Os10g0508000	Multicopper oxidase, type 1 family protein.	monocopper oxidase, putative	2.83982	2.96943	1.41348	3.85679	2.74078	6.10991	1.72438	-0.105276	2.21472	6.33289	6.47507	5.67556	2.48713	1.57107	1.76334	5.27347	5.94952	5.35219	12.9355	12.9078	11.8947	14.0042	13.8127	13.1807	-0.330841	4.8436	5.07247	5.95721	6.51226	5.8914	8.51182	8.07118	8.14798	8.46627	7.98753	7.3115	6.16668	6.26431	7.35942	7.29025	7.69314	8.21088	14.0393	13.9216	13.9677	6.69666	13.6306
Os10g0510400	Putative methyltransferase DUF248 family protein.	dehydration response related protein, putative, expressed	10.608	10.2582	10.8862	9.97063	9.75708	9.66654	10.3908	10.2009	10.1662	10.8748	10.9499	9.90766	10.0197	10.1683	9.80408	10.1443	10.4987	10.5711	12.3835	12.1593	11.9142	12.2521	12.2119	12.0365	10.3247	10.2623	11.2012	11.933	11.6658	11.3243	11.9613	11.7806	11.739	12.0773	11.5708	11.755	12.0774	12.2433	12.2267	12.5182	12.5869	12.1277	13.3312	13.4422	13.4338	13.0232	13.1113
Os10g0524000	Conserved hypothetical protein.	expressed protein	2.75812	2.98729	3.92923	3.41649	2.36562	3.98027	2.82675	2.40995	3.22845	2.00485	2.20071	3.6133	1.5946	3.08382	3.07562	2.14014	2.77233	1.51529	8.10224	7.29756	7.51224	8.55971	8.63701	8.56557	3.61598	-0.908838	4.81987	5.27088	0.885799	-0.778954	5.64266	5.89917	5.53011	6.12503	5.91153	5.12657	4.61561	4.51619	3.67148	3.17908	4.7227	3.6944	8.80162	8.12983	8.55621	4.0495	8.55892
Os10g0531900	Basic-leucine zipper (bZIP) transcription factor domain containing protein.	bZIP family transcription factor, putative, expressed	8.74847	8.55305	9.07255	6.39004	5.83497	7.28579	4.10037	2.49797	3.32063	3.37571	2.90209	3.68246	2.7941	5.20491	3.49349	0.559004	2.94397	2.29845	8.01043	7.48623	7.09967	7.7942	7.93843	8.25338	5.90027	5.85748	6.2057	7.09204	7.63013	8.17895	7.812	7.336	8.27032	7.82775	7.32488	7.07588	6.205	5.75346	7.22426	6.49604	6.41653	6.38834	10.9091	10.6738	11.0965	7.69817	10.5185
Os10g0542700	(No Hit)	expressed protein	4.00562	4.48831	6.10963	3.84561	4.12874	9.92149	4.20338	4.5094	3.96239	3.41495	3.99184	4.33757	5.2784	4.81632	5.53916	4.43852	4.23434	5.4924	5.57894	4.83132	6.45401	6.07525	6.46005	6.52346	0.292787	4.80089	3.0414	4.11553	4.36194	3.87233	3.57355	3.50494	4.49681	3.60562	2.12903	3.98748	5.61409	4.71226	5.15661	4.96125	3.94141	4.75511	5.76981	6.88805	6.8177	5.1902	7.09986
Os10g0554100	Oxysterol-binding protein family protein.	oxysterol-binding protein, putative, expressed	7.96253	7.87887	8.27289	8.39103	8.49016	8.23583	8.31891	7.8328	8.04988	8.90078	9.09192	8.43937	8.17779	8.39494	8.07644	8.33369	8.55946	8.58434	8.38897	8.34145	8.6062	8.89048	8.99466	9.37478	8.4463	7.8682	8.23252	8.62443	9.00628	8.58515	8.66133	8.42398	8.94736	9.03639	8.60023	9.1268	7.81697	8.25161	8.66214	8.44189	8.19744	8.70317	9.0016	9.2277	9.50384	9.60705	9.49401
Os10g0558200	2OG-Fe(II) oxygenase domain containing protein.	flavonol synthase/flavanone 3-hydroxylase, putative, expressed	6.32955	6.67861	6.57454	4.50522	4.6878	5.35275	3.85779	3.96483	4.51141	1.22062	2.41723	4.09409	4.64736	4.60456	4.39899	4.04808	3.56135	3.98834	7.9123	6.69182	6.23733	7.03903	7.67801	7.71367	5.0724	3.94014	5.52013	5.40482	5.18221	4.32173	4.04702	5.35116	3.55117	5.71966	6.52381	4.99947	5.6832	6.03317	3.82428	3.7918	5.40098	3.78483	8.65256	8.23553	8.08154	1.80659	8.1348
Os10g0560700	Pathogenesis-related transcriptional factor and ERF domain containing protein.	AP2 domain containing protein, expressed	6.88305	5.81824	9.07049	5.38865	6.59681	8.21505	7.50717	6.75748	6.58777	5.99331	6.36808	7.1375	5.7913	6.13133	5.85196	7.40399	7.09756	7.34203	9.66835	9.1443	10.616	10.1476	10.3946	10.4983	7.85697	8.13953	7.91254	9.67672	9.29857	10.169	8.51255	8.85014	8.84302	9.20127	9.18168	9.27508	6.97452	7.06308	7.63816	6.89837	7.27648	7.12735	9.45825	9.96085	10.0155	10.8954	10.2906
Os10g0563900	Cyclin, N-terminal domain containing protein.	cyclin, putative, expressed	6.18755	5.75068	5.82506	4.51156	4.48269	6.83389	6.19561	4.86579	4.51402	4.56605	4.86281	4.47268	2.32261	2.61722	3.22367	3.63856	2.39248	2.51198	10.475	9.02111	9.70772	10.6797	10.8899	10.8858	3.74995	6.29604	6.5341	4.84555	4.58921	4.49879	11.0258	10.8224	10.9752	10.8373	10.5542	10.1589	8.14444	8.6962	9.79949	9.3906	9.4922	9.95269	9.55516	11.7644	11.421	10.1898	11.1308
Os10g0575000	Transcription factor MYC7E (Fragment).	transcription factor MYC7E, putative, expressed	10.2755	10.6652	11.2188	10.3081	10.6104	10.6226	10.6415	11.4341	11.5168	10.5998	11.239	11.0936	11.6687	11.4277	11.2171	11.617	11.3332	12.0423	10.2178	10.7304	11.6969	10.9186	10.9537	11.1968	11.1553	10.6862	9.79159	11.7309	11.9623	11.2955	10.3331	10.6825	11.2407	10.502	10.7515	11.2191	11.7398	11.0316	11.6657	10.7692	10.9409	11.2812	11.1289	11.0097	11.2888	11.5785	11.1579
Os11g0106900	LOB domain protein 15.	DUF260 domain containing protein, putative, expressed	8.31623	8.58631	7.29383	8.79221	9.12497	8.18466	6.73167	6.84754	6.2221	5.54276	5.86074	5.4253	7.24265	6.97379	7.14132	6.24341	7.44694	6.29243	7.60028	6.31704	8.37512	7.49246	9.23314	9.06312	3.90814	-0.529366	6.76297	4.83001	4.98783	5.14144	7.87085	7.52609	7.844	7.77578	7.39015	7.51541	5.81114	5.86805	7.4096	7.14043	7.13254	8.80163	10.201	9.30214	9.78533	8.61991	10.0826
Os11g0109000	Protein phosphatase 2C-like domain containing protein.	protein phosphatase 2c, putative, expressed	4.72395	4.58216	6.07818	4.14811	4.34755	5.30902	4.30725	4.65785	4.52978	4.10329	4.61631	4.86918	4.57856	4.63558	5.6527	4.0648	3.7717	4.45918	11.7058	11.0724	11.3275	11.7877	11.8815	11.6986	4.49675	3.14296	2.82053	4.41505	3.01371	2.82081	5.87042	6.13426	5.99961	5.25409	6.14266	5.78576	5.24845	4.83122	4.82144	5.52803	4.80566	4.4967	11.4196	10.9316	11.1758	6.50679	10.5662
Os11g0133800	Zn-finger, DHHC type domain containing protein.	zinc finger DHHC domain-containing protein, putative, expressed	4.38656	4.38615	4.82524	5.11261	4.36261	5.87758	4.01314	3.02997	5.10261	3.96254	3.97546	4.5261	5.22585	4.11217	3.61457	4.69176	4.3788	4.43429	5.19511	4.76709	6.3743	4.78714	5.55254	5.79055	5.63739	6.35887	4.75976	4.58673	4.06833	5.70823	6.5135	6.49425	6.97349	6.67992	6.71163	7.49147	6.46643	6.78853	6.38995	7.10297	6.88418	6.33545	4.25542	7.09072	7.17133	7.45319	7.89163
Os11g0141900	BTB/POZ domain containing protein.	BTBA5 - Bric-a-Brac,Tramtrack, Broad Complex BTB domain with Ankyrin repeat region, expressed	3.28872	3.6328	3.64214	3.83622	3.49992	3.79493	1.4163	2.30453	3.5502	2.61263	3.42937	3.53786	3.39778	2.3123	0.778766	2.64688	2.47019	2.80747	10.4553	11.3282	10.2306	11.4743	10.817	11.1856	11.3645	10.7587	10.7415	12.2042	12.4297	11.9221	1.79026	1.06429	1.59922	2.13921	1.7316	1.27805	4.8687	3.61615	3.83098	2.10977	2.17389	4.68194	4.20536	6.31879	7.21051	5.91023	5.80679
Os11g0149300	Hypothetical protein.	expressed protein	6.73981	7.4532	5.26958	6.96739	6.8424	5.92662	5.29282	5.39897	5.87671	6.53716	7.14381	7.70954	6.43532	6.8789	6.65305	7.4553	7.07405	6.93969	7.25256	6.81466	5.14689	8.69487	7.70243	7.88285	5.26569	5.99566	5.34239	6.7377	6.63082	5.92391	5.98983	5.86577	6.7293	6.54694	6.10525	5.82553	4.60368	3.76688	4.35446	4.33334	4.08942	5.41761	7.98849	7.32396	7.39513	5.88448	7.92735
Os11g0150300	Hypothetical protein.	No Hit	4.10847	3.7542	3.76071	3.12504	3.75307	5.79981	3.92776	3.12267	3.84861	3.20019	2.99255	3.85448	3.14484	2.96237	3.73731	3.59553	3.01622	4.0687	6.84134	5.80324	4.85411	5.9097	5.84989	6.14601	4.72881	5.7846	5.72106	4.74562	3.52736	5.12283	5.42287	5.7299	3.71254	5.1821	6.5087	5.87709	6.10859	5.75689	4.07593	4.10028	5.49086	3.82017	6.95487	7.30395	7.01555	2.43348	6.50326
Os11g0170200	Plant protein of unknown function DUF869 family protein.	myosin heavy chain-related, putative, expressed	8.88399	8.5366	8.89984	9.70092	9.54269	9.5827	9.62585	9.32051	9.097	10.2931	10.1212	9.54828	9.19149	8.75689	8.5556	9.52295	9.93841	8.94169	11.2904	10.5415	10.8249	11.6361	11.7488	11.5695	7.35203	7.31237	7.29433	8.02659	9.29947	8.45349	11.0477	10.8424	10.8367	11.04	9.97377	10.4686	9.52317	9.30428	10.4	9.33921	9.76132	10.0427	12.5672	12.3828	12.2601	13.3625	12.4548
Os11g0183700	SWIRM domain containing protein.	SWIRM domain containing protein, expressed	9.29332	9.05313	8.73545	9.33691	9.1124	8.83172	9.56832	9.24245	9.17614	9.6486	9.08773	8.55006	9.39319	9.67499	9.54966	9.3292	9.70547	10.122	8.9005	8.83938	8.62419	9.72288	9.59753	9.68466	8.54027	7.91163	8.30954	9.07403	9.01169	8.62655	8.89131	8.63942	8.65356	9.31187	8.65466	8.73433	7.67152	7.96558	8.17669	8.83237	8.30956	8.22955	9.23739	9.16532	9.03082	9.09194	9.76139
Os11g0197400	Protein of unknown function DUF803 family protein.	DUF803 domain containing, putative, expressed	12.2951	12.3293	11.8893	12.395	12.5055	11.9185	10.7813	10.564	10.5246	9.71574	9.85475	9.29758	9.76767	9.61996	9.55603	9.02033	9.10383	8.55511	10.2557	10.7597	10.9238	9.8136	10.3202	10.5778	9.75913	9.23649	9.36548	9.99117	9.82158	9.66032	9.57959	9.219	9.97255	9.85898	9.22439	9.59852	7.50399	7.80689	8.74458	8.10207	8.04535	8.33764	10.6671	10.9566	10.9539	11.1583	10.9417
Os11g0198100	Protein of unknown function DUF616 family protein.	hydrolase, acting on carbon-nitrogen, putative, expressed	5.07487	4.18369	4.94353	4.94664	4.88899	4.83823	4.83667	5.02506	5.46539	4.55443	4.77922	5.55908	4.50247	5.09011	4.88955	4.77985	4.96723	5.21368	5.82881	5.56046	6.03789	6.71034	6.89727	6.96373	5.01797	2.86534	5.72996	4.68256	5.06485	5.00838	6.77643	6.43079	6.95964	7.28295	6.49821	6.84491	5.62632	4.99448	6.11249	4.8164	5.8329	6.46247	6.76104	7.45147	7.3757	6.79788	7.24835
Os11g0217300	GHMP kinase family protein.	GHMP kinases ATP-binding protein, putative, expressed	7.36803	7.72684	6.96135	8.77142	8.93954	8.30896	8.34186	8.43833	8.8499	8.71172	9.35172	8.35435	7.21148	7.38437	7.4752	7.56558	8.47142	7.6636	7.35707	7.50159	7.8933	7.5269	7.82153	7.90027	7.83371	7.02743	7.75891	8.49655	8.75894	7.91272	7.06467	6.92198	7.43758	7.22731	6.298	7.31849	6.15502	7.15584	7.68882	7.19016	7.25719	7.62593	7.45091	7.77091	7.56946	8.88408	8.05165
Os11g0223000	Non-protein coding transcript, uncharacterized transcript.	No Hit	4.12857	3.20653	6.53149	3.09909	2.65587	2.61953	4.48314	4.49972	4.19829	3.72129	3.39777	3.29343	3.06161	3.82314	4.54592	3.60919	3.17049	4.12507	3.25697	3.72479	3.28879	2.91329	2.57786	1.31523	4.7403	5.94787	4.65195	3.8854	2.25882	2.86991	3.46815	3.71401	5.28867	3.37025	4.64826	3.1447	2.02287	3.6801	2.04516	2.46871	3.35741	2.57125	3.92853	3.98771	4.2998	4.34766	3.2382
Os11g0235000	(No Hit)	No Hit	5.46437	6.23489	6.16483	7.06336	6.42282	7.29599	6.58459	8.07404	7.26828	6.0759	4.89135	6.56784	6.45562	4.37202	5.94187	7.02325	7.38246	5.70819	4.14066	4.77915	5.62878	4.79715	4.59544	4.20541	5.59223	6.44858	5.74112	4.79102	4.55724	5.80131	5.84191	6.20539	5.30585	5.94098	6.51363	7.09273	8.82173	7.00594	6.16367	6.7141	6.53417	7.11655	6.52427	4.95909	4.58235	5.09654	4.52566
Os11g0245500	Lipid-binding START domain containing protein.	expressed protein	6.99896	4.60368	5.214	4.98857	5.06994	6.11043	6.73151	6.67977	6.8068	7.86701	7.27183	8.27087	6.45584	6.03047	6.37738	6.84689	6.53724	6.86699	10.4614	9.00546	10.1598	11.4115	11.3321	11.4235	6.18634	5.78087	5.7875	7.14333	6.43558	6.75168	10.597	10.5525	10.9283	10.4774	10.4338	10.6005	8.06379	8.20886	9.49433	8.55329	8.76347	9.93114	11.3504	11.8211	12.1436	10.1934	12.2106
Os11g0270700	Hypothetical protein.	No Hit	6.72148	6.50398	7.23476	6.99372	7.07413	7.49662	5.25917	4.93581	4.81949	7.05278	6.93408	6.20566	5.24409	5.75885	5.4548	5.91065	6.41285	5.13935	6.10561	4.41014	6.08709	4.54855	5.90101	5.67291	4.83055	2.05941	6.11223	4.1755	5.38655	5.61424	4.1007	3.88429	3.17092	3.86396	4.40456	3.57919	5.32543	4.70163	4.0166	5.06058	4.69458	4.28597	6.62458	6.27953	5.72248	7.0548	6.23878
Os11g0308800	Protein kinase-like domain containing protein.	expressed protein	3.00605	0.996535	2.14306	2.61833	2.40943	3.43131	4.33705	3.84037	4.16835	3.63381	3.88572	3.42319	4.2513	2.68108	1.51419	3.55759	2.92619	2.65376	9.8984	9.17908	8.42735	10.3424	10.1593	9.46376	4.56347	5.34779	5.35592	4.10125	4.45556	5.46932	6.77614	6.70971	6.52227	6.68003	6.31183	5.73983	4.69839	4.83491	5.59583	4.85138	5.52822	6.08268	10.7686	9.91099	9.84596	3.82859	10.1468
Os11g0461000	Peptidase S10, serine carboxypeptidase family protein.	OsSCP62 - Putative Serine Carboxypeptidase homologue, expressed	3.87072	3.9576	5.14851	3.17874	3.69443	4.91103	3.11619	2.60247	3.13144	2.5405	1.19938	1.37657	2.59977	2.0677	6.067	3.01352	2.01396	2.49383	6.41554	4.22647	8.27283	5.5808	7.31525	8.00192	1.73814	4.71632	4.44452	3.58736	2.57594	3.23239	2.19155	2.33394	2.06682	2.48811	3.72779	2.25699	2.71074	1.95311	1.98341	1.39221	2.30517	1.23843	3.73803	5.57143	5.66855	2.87597	5.60809
Os11g0481600	Hypothetical protein.	expressed protein	0.0135644	1.81564	-0.651905	0.896978	0.896532	1.41022	3.18531	2.68427	2.57687	2.19467	1.49256	1.13419	-1.00046	0.697156	2.84179	-1.08997	1.58722	0.381194	2.77927	2.28756	4.24748	3.60801	5.02522	5.44703	-1.83415	-1.17033	-1.88805	0.0167748	1.32271	2.34554	2.56909	1.00871	1.95301	3.33567	0.834439	1.79205	-1.12001	-0.340563	0.668634	2.08525	-0.66558	1.07088	5.92911	5.272	6.12393	7.48584	7.11785
Os11g0529500	Naringenin-chalcone synthase family protein.	chalcone synthase, putative, expressed	5.44691	5.30044	5.79563	5.89579	5.4262	6.00367	4.5751	4.74108	6.35801	5.7987	6.13271	7.3771	5.53893	5.67122	6.3239	6.20234	5.69504	7.09412	6.74051	5.90155	5.85846	6.87	6.77393	7.50714	6.54203	7.03945	6.53252	5.82558	5.74725	8.161	6.1095	5.99859	6.12839	6.42863	6.21269	6.22065	6.87731	6.18829	6.06718	6.51528	5.8871	6.63831	8.05278	6.87881	7.5147	4.85521	7.67429
Os11g0557000	Phytosulfokine family protein.	phytosulfokines precursor, putative	7.21437	7.32996	8.72635	7.55534	8.16432	8.21105	9.26554	9.56119	9.59889	9.50745	10.2782	10.8069	7.37175	7.75166	7.86057	9.71673	9.47309	9.29506	11.1086	10.2216	10.5603	10.89	10.749	11.376	12.4085	11.9537	12.4657	12.5583	12.4417	12.3407	11.8024	12.242	13.0211	11.4858	11.8366	12.1487	10.0414	10.6506	11.4415	11.0719	10.6099	12.0192	11.7725	12.4041	13.3088	12.7816	13.1487
Os11g0604600	Conserved hypothetical protein.	zinc finger, C3HC4 type family protein, expressed	9.88668	9.76008	9.86234	10.12	10.2336	9.93344	9.82982	9.80129	9.39771	10.1012	10.2357	10.0258	9.67197	10.2618	9.88318	10.0349	10.333	9.89741	10.0244	9.80265	9.94779	9.59989	9.75653	9.86009	9.5809	9.22857	9.67958	10.6753	9.88575	9.59473	10.3924	10.1189	10.5356	10.4156	9.79832	10.2298	8.78848	9.30249	9.84761	9.7158	9.79071	9.85964	9.31797	10.5111	10.0856	10.977	10.2653
Os11g0605500	Acyl-CoA oxidase.	acyl-coenzyme A oxidase, putative, expressed	7.64654	8.02105	8.04496	10.1684	10.6269	10.2448	10.0794	10.4662	9.98451	11.3588	11.8002	11.1557	8.30362	8.79679	8.33465	11.3979	11.6583	11.9408	10.0532	9.72148	10.7997	10.4549	10.929	11.3107	10.7191	10.4123	10.2454	12.6102	12.4457	11.7416	11.1841	11.4006	11.9698	11.3338	11.0528	11.9603	11.6954	11.5369	12.5465	12.4952	11.9948	12.5429	8.23335	10.3057	10.1277	11.8655	10.9117
Os11g0640300	Disease resistance protein family protein.	Leucine Rich Repeat family protein, expressed	7.6804	7.86601	6.71295	7.92366	8.00813	7.17085	7.70303	7.10808	7.29495	8.14237	7.9605	7.01951	7.09312	7.31462	7.19361	6.62983	7.18901	7.42625	7.28257	7.72904	7.34411	7.07534	7.36661	7.46555	6.68675	6.69951	7.47776	7.09729	7.69043	7.52432	7.41209	7.15827	7.46773	7.4042	6.46335	6.73782	6.38491	6.81568	7.15398	7.07212	6.67856	7.3497	8.89631	8.92198	8.70491	8.85399	9.11555
Os11g0644100	Leucine-rich repeat, plant specific containing protein.	leucine-rich repeat family protein, putative, expressed	0.706935	3.50537	3.54319	2.37692	3.11331	2.26995	3.20722	1.85028	3.33939	1.4882	2.75066	2.84592	4.66639	3.39009	2.90261	3.51894	3.49354	2.65242	10.9434	10.1641	10.9517	11.8287	11.9954	11.5951	-0.75949	4.44677	4.37428	3.36204	1.92731	5.44482	7.6698	7.72471	7.16732	7.94351	7.76899	6.68019	5.19213	5.3311	5.5625	5.69877	5.82333	5.59032	10.9053	11.5533	11.8459	2.34271	10.9125
Os11g0648000	Sodium/hydrogen exchanger subfamily protein.	transporter, monovalent cation:proton antiporter-2 family, putative, expressed	11.955	11.7527	11.1908	10.79	10.4094	10.1288	11.065	10.8633	10.8369	11.44	11.2489	10.696	11.8392	11.6583	11.397	11.01	11.159	10.9406	9.63301	10.0434	9.69712	10.1561	10.1303	9.9033	10.2932	9.85433	10.7606	11.7082	11.2398	10.9131	9.89397	9.37074	9.77787	10.1541	8.88909	9.59452	9.17386	9.69475	10.1493	10.722	9.94252	10.5653	10.1067	10.2855	10.261	11.5551	10.4741
Os11g0653300	Hypothetical protein.	Leucine Rich Repeat family protein, expressed	3.50027	3.31933	4.19691	3.40063	6.48967	5.42972	3.54165	3.13139	2.91463	3.16068	3.46995	3.2606	3.51576	2.66289	2.22879	3.55435	1.49684	2.05014	7.83956	5.52879	8.54056	7.45395	8.62302	8.18284	0.857119	4.35704	4.12903	2.98651	2.89885	4.49172	5.71497	5.22905	6.23861	4.54568	3.27039	2.35559	6.24297	3.43334	5.71144	2.78439	3.17445	2.76335	6.93828	8.32293	8.76154	7.7834	8.6119
Os11g0661900	Hypothetical protein.	No Hit	2.56449	3.20123	4.501	3.56096	3.63865	3.95127	3.68713	3.70181	3.64487	4.42475	4.29178	4.59744	2.7312	3.26671	2.40018	3.42861	3.53079	3.59323	10.3028	9.29619	9.87381	10.0583	10.2289	10.3723	4.91829	5.18856	4.9617	3.57054	5.31897	5.78243	9.78829	9.83629	9.9576	9.75342	9.43283	9.31785	8.28432	8.28354	9.27802	8.49254	8.39425	9.12344	11.8511	11.8381	11.8102	9.73956	12.2724
Os11g0686100	Conserved hypothetical protein.	expressed protein	14.2577	14.6995	14.3971	14.3494	14.7719	14.6411	14.3376	15.0131	14.9335	14.7938	15.2685	15.2492	14.5462	15.1472	14.8942	14.9533	14.934	15.4916	15.6549	15.1855	15.4447	15.8839	15.8232	15.9781	15.0072	14.7547	14.5407	15.8862	16.0673	15.5972	15.2954	15.6695	15.9572	15.2735	15.4952	15.6417	14.9437	14.9002	15.5333	14.9017	14.903	15.6348	16.3237	16.4221	16.6233	16.7764	16.2886
Os11g0695800	Protein kinase domain containing protein.	No Hit	3.20846	4.15672	2.57581	4.39034	4.38665	3.70578	5.65268	5.3971	5.3502	7.22332	6.86254	6.07183	5.06941	5.16129	4.91763	5.36762	5.97004	5.63414	3.19518	4.63096	3.23883	3.3686	2.99163	2.85044	5.9326	5.9146	6.21004	5.70603	5.62112	5.38393	3.59828	3.84936	3.22777	3.22438	4.49734	3.98277	5.00693	5.6219	5.66009	5.80794	5.07118	5.24998	2.02108	2.62048	3.08708	4.04123	1.63979
Os12g0132200	Serine/threonine kinase.	CAMK_KIN1/SNF1/Nim1_like	5.80197	5.79427	5.42048	6.10112	6.13111	6.52234	5.2631	5.07907	4.81445	5.18198	4.75271	5.20482	5.94752	6.49694	6.37826	4.84274	4.93315	5.66696	4.91865	3.88308	5.37199	4.80995	5.82285	6.25438	4.16133	1.16639	4.70948	5.30318	5.42349	5.08302	4.66249	4.25636	5.17378	5.25812	3.84702	4.57672	4.56496	2.42838	4.32419	4.13173	1.95751	4.15977	5.60032	6.0027	5.44019	6.71678	6.13155
Os12g0137600	Sulfotransferase family protein.	sulfotransferase domain containing protein	2.69554	3.26205	3.82327	3.47112	3.50473	4.31454	4.29222	2.61823	3.62167	2.70763	2.48364	4.24382	2.47875	2.80557	2.97375	3.41154	2.98713	2.56975	4.87524	4.86053	5.29539	4.8453	4.97285	5.14831	5.35449	4.5533	5.98449	5.48914	5.86399	6.17144	6.38053	6.36064	6.95954	6.5772	6.14652	6.52251	6.35274	5.70013	6.35802	6.13471	5.33879	6.77495	3.41561	4.3785	4.32122	4.85696	4.44639
Os12g0138500	Ankyrin repeat containing protein.	BTBA6 - Bric-a-Brac,Tramtrack, Broad Complex BTB domain with Ankyrin repeat region, expressed	4.30028	3.84394	3.87891	4.63555	4.09179	4.48631	3.63966	3.21388	3.42867	3.49952	3.51844	3.14301	3.12396	3.66983	1.87342	3.36897	3.05411	3.1148	10.7635	11.6072	10.2304	11.9956	11.2186	11.4014	10.9665	10.3442	10.7739	12.416	12.7366	11.8041	3.24767	4.53063	1.9675	3.24323	5.16589	2.76856	5.34528	5.6416	4.29928	4.32767	5.13966	4.90932	4.94128	6.40474	7.53538	6.53887	6.2193
Os12g0155200	Rac GTPase activating protein 1.	rhoGAP domain containing protein, expressed	11.985	11.8273	11.8148	10.6686	10.6646	10.6906	11.5566	11.5071	11.1475	10.7413	11.1868	10.6977	10.3348	10.6371	10.6541	9.75976	10.4188	9.75548	12.0276	11.3575	12.1093	11.8677	12.0983	12.0894	10.274	9.53621	9.84516	10.4688	10.7584	10.3167	11.1383	10.9798	11.2469	11.1165	10.4799	10.7191	9.92595	9.94302	10.4984	9.74815	10.1813	10.4146	11.676	12.0915	12.1818	11.4882	11.9407
Os12g0180100	Major facilitator superfamily protein.	transporter, major facilitator family, putative, expressed	7.65306	7.42459	7.36304	7.60179	7.38149	6.84339	7.01944	7.76092	7.43811	8.17971	8.11159	8.08976	8.13422	8.37255	7.81485	7.93289	8.01591	7.71852	8.68571	8.44512	8.05922	8.72909	8.69613	8.5723	8.55462	8.33771	8.35393	9.42217	8.39093	7.81686	8.79223	8.1896	9.01572	9.10023	7.75775	8.40793	6.71878	7.15735	8.20423	8.00685	7.39529	8.24656	8.32147	9.24111	9.27102	8.80371	8.90703
Os12g0181600	Amino acid/polyamine transporter II family protein.	amino acid transporter, putative, expressed	11.7332	12.1222	11.0178	12.2391	12.4407	12.2961	11.0609	11.5572	11.1689	11.9345	12.5191	10.8173	9.51803	9.70209	9.37805	11.1427	11.1561	11.6444	9.89737	11.3519	11.3188	12.3161	11.5648	11.5863	8.43854	8.08289	9.67652	11.2245	12.6138	10.7248	8.38862	8.72975	8.94092	8.88615	8.69175	9.26999	7.35387	7.51344	8.61075	7.1728	8.37272	8.06185	8.74859	6.8955	7.50978	9.02864	8.30699
Os12g0205500	Disease resistance protein family protein.	NB-ARC/LRR disease resistance protein, putative, expressed	5.75994	5.7067	5.75042	6.10899	5.81602	5.10528	7.12688	7.38512	7.21895	7.17732	7.51021	6.9289	7.48544	7.7105	7.70296	7.19742	7.60302	7.46941	6.62936	7.43366	6.58523	6.61985	6.2441	6.45564	7.37174	7.25357	7.96128	8.09642	8.05843	7.36862	5.89811	6.00757	5.65783	5.75553	5.94287	6.02206	7.12097	7.19433	7.2007	6.91296	7.0888	7.48171	7.75126	8.08239	8.12114	8.17033	8.04076
Os12g0235700	Protein kinase domain containing protein.	expressed protein	4.17327	4.28013	4.57548	4.34273	3.74975	4.13281	5.48514	5.5102	6.37716	5.23888	5.84301	4.42978	4.87717	5.12657	7.27813	4.27674	4.59843	5.2899	5.83927	5.72908	6.53162	6.49894	7.36857	6.99296	4.70841	5.55216	4.22119	5.67352	5.23712	5.18786	6.76662	6.19	6.36777	6.87811	6.74494	6.16805	4.92894	5.47606	5.58704	5.13151	5.47606	5.76016	5.3282	6.50512	7.31078	7.62319	7.14591
Os12g0245700	Non-protein coding transcript, unclassifiable transcript.	expressed protein	3.29696	4.17205	5.06968	3.33079	4.9225	5.06661	4.25332	4.73515	5.80894	5.96493	5.12145	5.36637	3.31766	4.51747	4.66603	3.25247	3.46736	4.40576	11.162	9.61135	9.26871	9.66329	9.75065	10.5723	7.31901	6.19041	8.18768	5.16053	5.93043	8.70106	10.4872	9.96077	11.2276	10.3325	9.72415	9.79234	7.5014	7.93546	9.39117	9.71326	9.41292	10.5918	12.4007	11.4063	11.9457	6.72516	11.715
Os12g0273700	Hypothetical protein.	expressed protein	2.51044	4.74184	2.64444	1.388	2.25185	0.0109137	1.10167	1.62006	3.27933	2.67676	2.59761	2.01763	3.8048	2.09593	2.60104	3.99062	2.359	1.82073	7.12429	6.83672	5.19217	7.63929	7.4634	7.33435	4.22613	4.64994	2.38541	2.48807	1.75619	4.24886	6.44769	6.18664	6.10577	6.51253	6.06653	5.49543	4.77601	4.6906	4.82738	4.08525	5.05612	4.99027	8.27597	8.18988	8.20283	2.16876	8.21021
Os12g0297400	Hypothetical protein.	expressed protein	10.6281	10.9711	9.68446	9.57965	9.62482	8.67192	10.4382	10.439	10.1095	9.68168	9.51387	8.69737	9.84006	9.76749	10.01	8.60207	9.78211	8.61626	7.89455	8.32022	9.10395	7.77168	8.62031	8.91334	7.70124	6.42614	8.48004	6.70539	7.65577	7.05208	7.9975	7.72952	8.26014	8.49997	7.34481	8.05136	7.32892	8.38731	8.54196	8.56447	8.14209	8.86007	10.4534	9.89363	9.40633	9.3912	9.90625
Os12g0460100	Hypothetical protein.	expressed protein	5.75194	3.77455	6.88077	2.74682	2.05515	2.12416	7.33175	6.63147	5.74099	5.1876	4.47349	5.09444	6.36276	7.12489	6.6203	5.19321	5.41282	5.91171	7.07822	7.11888	6.13158	4.09388	3.8614	3.67215	4.59045	5.17688	6.05367	6.36789	4.63146	4.9441	1.81906	0.453796	1.72285	1.95333	0.701184	3.03299	1.94782	0.357423	2.59175	4.1969	0.614168	3.0311	2.13547	4.50944	4.80086	6.5619	4.58039
Os12g0480200	Protein kinase domain containing protein.	AGC_PVPK_like_kin82y	8.53633	7.52415	8.89934	8.32127	8.06779	8.96151	8.9862	7.9175	7.82368	7.24506	7.17293	6.90857	6.66465	6.39994	6.97688	6.32794	6.64135	6.30473	10.2101	9.93204	9.94705	10.3223	10.2425	10.5511	9.40812	9.10202	8.73131	10.2744	10.1324	9.25818	10.2326	9.83458	10.1272	10.2745	9.55036	9.34958	7.824	8.10271	8.80328	8.84857	8.58126	9.01877	11.2529	11.1555	10.8475	10.9715	11.3563
Os12g0496000	(No Hit)	No Hit	8.67338	8.96053	8.7357	7.68709	8.2244	8.11537	9.46668	10.0922	9.69535	9.71964	9.78154	8.78073	7.48279	7.36729	6.57221	7.61794	8.20991	7.84171	7.77282	9.76687	9.76212	7.93401	8.06973	7.94106	8.70654	8.63269	8.94536	9.10452	11.0566	7.70776	8.10986	8.47577	8.38149	7.97114	7.81532	7.64807	10.5186	9.13145	8.56078	9.18521	8.75192	8.40733	8.13714	8.13085	7.31015	9.93007	7.44902
Os12g0507200	Eukaryotic translation initiation factor 5A-2 (eIF-5A) (eIF-4D).	eukaryotic translation initiation factor 5A, putative, expressed	11.232	11.3204	11.0401	11.0334	11.1339	10.7424	11.7001	11.9783	12.1006	10.9969	11.3391	11.2974	11.6603	11.7978	11.5799	11.2982	11.0965	11.4652	11.4433	11.687	11.2545	12.0002	11.6906	11.8327	12.2909	11.8781	12.2072	12.4528	12.1163	12.0916	11.1563	11.0755	11.2743	11.3164	11.0511	11.4509	11.3061	11.3022	11.7738	11.153	11.5799	11.9599	11.6486	12.0245	12.1176	11.9825	11.629
Os12g0528400	Glutathione synthetase GSHS1.	No Hit	10.6642	10.9098	10.2178	11.0272	11.1033	10.4456	10.7707	10.5659	10.3167	10.4766	10.4615	9.91819	10.4332	10.6714	10.5472	10.4822	10.7971	10.4487	10.2913	10.5367	10.2492	10.3851	10.3496	10.5836	10.2137	9.71004	10.7985	10.8664	10.617	10.0907	10.0638	9.73791	10.1631	10.2175	9.34035	9.89155	9.77188	10.0319	10.2029	10.1858	10.006	10.3511	10.6921	10.5614	10.4049	11.0029	10.9556
Os12g0548200	Heat shock protein DnaJ, N-terminal domain containing protein.	auxilin, putative, expressed	12.2472	12.1722	11.909	12.6931	12.8916	12.1927	12.5274	12.9323	12.7257	13.036	13.1808	12.3619	12.8057	12.8979	12.5263	12.85	13.2498	13.3461	11.6101	11.898	12.008	12.4614	12.5488	12.5357	12.29	11.7078	11.8961	12.7762	13.1435	12.4929	12.5832	12.3119	12.8148	12.7947	12.335	12.661	12.5911	12.3972	12.802	12.3548	12.8597	12.7513	12.603	13.1325	12.8569	13.0967	12.9609
Os12g0573600	Non-protein coding transcript, unclassifiable transcript.	No Hit	6.16283	4.4088	8.36554	2.36438	2.31242	4.81873	6.78969	3.48348	3.32503	2.55602	2.31777	5.01536	1.69783	2.29094	1.89186	-0.482843	1.35442	2.97664	11.9361	8.59292	13.1741	10.4237	11.8436	11.5809	4.92668	5.81727	7.11544	3.75122	5.12551	7.06146	9.27246	9.24547	9.74778	8.83641	8.45502	8.84284	6.89901	6.67192	8.15674	7.33271	8.15486	8.30862	9.14259	10.5962	10.343	12.9666	10.9512
Os12g0581300	Protein of unknown function DUF620 family protein.	expressed protein	8.12661	7.52041	7.53405	8.8381	8.37824	7.98317	9.21305	8.52991	8.18326	10.0909	9.6359	9.30562	7.99259	7.88934	7.48336	9.32017	9.21722	8.84719	11.2386	10.8165	9.58233	11.4373	11.061	10.6956	8.54146	8.9589	8.8375	10.4856	9.83	9.76128	10.4795	9.77024	9.72432	11.0399	10.1293	9.9507	8.39829	8.7331	8.81293	9.46821	9.15647	9.24209	12.4113	11.8473	11.7053	10.1833	12.199
Os12g0594000	WD40-like domain containing protein.	WD-40 repeat family protein, putative, expressed	6.43803	5.57665	6.17805	4.33878	1.80193	4.97426	5.23676	4.84428	6.16037	4.01365	3.3917	5.45125	6.37915	5.90097	7.27763	5.01729	4.8865	7.06707	3.73575	4.59468	5.11399	4.3152	4.22494	2.77307	5.69143	5.92086	3.29494	5.74501	4.3898	5.83431	3.93041	5.12319	2.66783	3.8917	6.03154	3.93337	5.17842	5.87023	3.6927	3.87587	5.64831	3.92739	1.16242	3.76493	3.92492	2.74752	5.1911
Os12g0622500	DNA topoisomerase, type II family protein.	type IIB DNA topoisomerase, putative, expressed	7.63267	5.67666	5.75891	5.32728	5.76539	5.52111	6.92974	7.19942	6.77865	5.7314	5.59472	5.81049	5.13772	6.17285	5.92812	4.73338	5.25261	5.24329	10.6381	10.2388	9.42439	11.0188	10.5772	10.7468	8.35505	8.41455	9.355	8.13866	7.82496	7.56032	9.44216	9.44286	9.69791	9.5389	8.94419	8.96777	7.77198	8.14649	8.64238	8.74042	8.55524	9.05621	12.0038	11.4698	11.5293	9.07344	11.6454
Os12g0624200	Sodium/calcium exchanger membrane region domain containing protein.	sodium/calcium exchanger protein, putative, expressed	3.47041	1.62636	4.04907	1.60726	1.78562	3.53097	6.55773	6.80592	7.16083	5.07995	5.21604	5.42423	8.88436	9.01334	8.10174	9.18924	8.99804	9.90911	7.99757	7.57492	8.05154	7.92782	7.9179	7.34464	9.44221	8.80541	8.11447	10.9551	9.78442	9.44703	6.93942	6.66021	6.61678	7.76978	7.03666	7.17245	8.08679	8.67966	8.83098	9.75337	8.92589	9.29292	8.65394	7.63123	7.92131	7.14507	8.9777
Os12g0630100	Thaumatin-like protein precursor.	thaumatin, putative, expressed	7.8041	6.75103	8.66975	7.07813	6.07795	9.01848	8.61681	6.90609	7.67921	7.02509	6.70281	8.64917	3.70941	2.93033	2.76097	4.12444	3.50659	3.74607	5.03162	5.9138	3.76982	5.26135	3.88136	3.74	6.4003	5.85713	6.66036	4.81757	5.92976	5.91817	4.64642	5.29068	4.61738	4.52382	5.95281	4.93226	5.05317	5.71966	4.85135	4.17766	5.38033	4.67085	1.69663	2.46948	2.53917	4.30618	2.31698
Os12g0630200	Antifungal protein R (Fragment).	thaumatin family domain containing protein, expressed	3.30675	3.05654	3.95911	2.81161	2.22773	3.9165	6.05179	4.30456	4.15832	4.81694	3.97455	4.88011	1.86052	2.69516	2.85582	3.29057	2.34366	3.69979	8.07265	9.05786	4.03072	7.80739	5.2224	5.80229	7.8968	6.62385	9.02097	7.18884	8.12277	7.53297	2.93058	2.94301	2.55344	2.67272	4.04863	2.6849	4.48059	3.30262	2.01343	3.59593	2.88281	2.76913	1.60957	2.10366	3.10224	4.21975	2.83342
Os12g0637400	Purple acid phosphatase (EC 3.1.3.2) (Fragment).	purple acid phosphatase precursor, putative, expressed	-0.341403	0.470621	5.16891	3.9383	2.15414	3.35847	4.44275	4.05257	3.97032	1.42729	2.06099	2.41101	1.88501	0.549188	1.49331	1.06906	1.56278	3.57858	4.45165	1.11885	4.25759	4.51957	3.9225	3.49897	3.3098	5.53032	0.746139	1.91492	1.02475	3.10773	-0.0422798	-1.3915	0.960431	-0.268209	-1.1399	-0.307503	2.9852	-1.61488	2.47483	0.0376261	-1.34306	0.345983	1.81034	0.903135	2.20938	3.54512	1.29238
[truncated: 129 more columns]
